# Supplementary material for: PRC2 loss impairs small cell lung cancer tumorigenesis and enhances sensitivity to G9a/GLP inhibition
Source: Research Square preprint supplement (doi:10.21203/rs.3.rs-5952196/v1), 2025-03-31
Supplement: Supplementary file 1 [file 4748bfbb96eb0e9f79d22b49.xlsx]

## Sheet: All proteins
Protein.Group	Protein.Ids	Protein.Names	Genes	First.Protein.Description	Symbol color	Symbol type	Symbol size	Show label	IgG_1	DMSO_E_1	DMSO_E_2	DMSO_E_3	IgG_2	GSK126_E_1	GSK126_E_2	GSK126_E_3	IgG_3	Tazemetostat_E_1	Tazemetostat_E_2	Tazemetostat_E_3
A0A075B6I1	A0A075B6I1	LV460_HUMAN	IGLV4-60	Immunoglobulin lambda variable 4-60	Color2 [A=255, R=169, G=169, B=169]	1	4		13.9138	12.3717	10.9154	9.78624	14.1178	10.6724	10.5203	11.6525	14.0352	10.343	11.6088	12.0859
A0A096LP01	A0A096LP01	SIM26_HUMAN	SMIM26	Small integral membrane protein 26	Color2 [A=255, R=169, G=169, B=169]	1	4		15.721	15.6736	14.9902	15.6741	15.4808	15.692	16.3033	15.5613	16.5782	15.987	15.7949	15.71
A0A0B4J2D5;P0DPI2	A0A0B4J2D5;P0DPI2	GAL3A_HUMAN;GAL3B_HUMAN	GATD3;GATD3B	Putative glutamine amidotransferase-like class 1 domain-containing protein 3B, mitochondrial	Color2 [A=255, R=169, G=169, B=169]	1	4		20.5665	20.4231	20.5641	20.6249	20.4901	20.2662	20.1178	20.2225	20.3959	20.1261	20.1309	19.9838
A0A0U1RRI6	A0A0U1RR11;A0A0U1RRI6;P0DPI3	CENL3_HUMAN	CENPVL3	Centromere protein V-like protein 3	Color2 [A=255, R=169, G=169, B=169]	1	4		11.5908	15.0432	10.6837	10.8603	10.2904	15.407	15.8055	10.4618	14.2433	14.9971	15.4284	9.96123
A0A1B0GTR4	A0A1B0GTR4	SPRR5_HUMAN	SPRR5	Putative small proline-rich protein 5	Color2 [A=255, R=169, G=169, B=169]	1	4		12.6211	15.1238	14.4578	14.1705	14.6638	12.7107	13.076	14.5934	14.6365	12.752	13.9164	12.5377
A0A1B0GV03	A0A1B0GV03	GG6L7_HUMAN	GOLGA6L7	Golgin subfamily A member 6-like protein 7	Color2 [A=255, R=169, G=169, B=169]	1	4		15.9251	11.6366	15.6335	14.2206	15.9903	15.4496	15.5121	15.1603	15.769	15.5628	14.6909	14.9495
A0A2R8Y7D0	A0A2R8Y7D0	TINCR_HUMAN	TINCR	Ubiquitin domain-containing protein TINCR	Color2 [A=255, R=169, G=169, B=169]	1	4		12.353	11.8796	11.1444	11.8192	10.3077	11.9446	11.5109	11.9948	10.0171	12.4892	10.8285	11.6659
A0A494C1R9;A6NKD2;P0CV98;P0CV99;P0CW00;P0CW01;Q01534	Q01534;A0A494C1R9;A6NKD2;P0CV98;P0CV99;P0CW00;P0CW01	TSPY1_HUMAN;TSPY2_HUMAN;TSPY3_HUMAN;TSPY4_HUMAN;TSPY8_HUMAN;TSPY9_HUMAN;TSPYA_HUMAN	TSPY1;TSPY10;TSPY2;TSPY3;TSPY4;TSPY8;TSPY9	Testis-specific Y-encoded protein 9	Color2 [A=255, R=169, G=169, B=169]	1	4		18.8594	19.3007	18.6312	19.3444	19.5203	18.8679	18.0435	19.1249	19.344	19.225	19.4205	19.2286
A0A6I8PU40	A0A6I8PU40	TUG1_HUMAN	TUG1	Taurine up-regulated 1 protein	Color2 [A=255, R=169, G=169, B=169]	1	4		12.6682	12.7552	11.39	13.4879	8.83945	10.9972	11.8693	12.4734	11.0965	12.1665	12.3396	12.2409
A0AVF1	A0AVF1	IFT56_HUMAN	TTC26	Intraflagellar transport protein 56	Color2 [A=255, R=169, G=169, B=169]	1	4		14.7134	14.8769	15.2596	15.1499	14.6181	15.1676	15.3074	15.1696	14.3209	15.4747	15.1362	14.9848
A0AVI4	A0AVI4	TM129_HUMAN	TMEM129	E3 ubiquitin-protein ligase TM129	Color2 [A=255, R=169, G=169, B=169]	1	4		15.7527	15.5076	14.9543	16.0491	15.4483	15.6972	15.6614	15.8848	15.9085	15.8482	15.9318	15.534
A0AVK6	A0AVK6	E2F8_HUMAN	E2F8	Transcription factor E2F8	Color2 [A=255, R=169, G=169, B=169]	1	4		10.5411	11.9344	12.9816	12.1697	13.0599	13.2178	13.1234	13.5665	12.6823	13.7565	12.5418	13.6822
A0AVT1	A0AVT1	UBA6_HUMAN	UBA6	Ubiquitin-like modifier-activating enzyme 6	Color2 [A=255, R=169, G=169, B=169]	1	4		14.2346	14.8003	14.7173	15.0747	14.5437	14.9053	15.03	15.2649	14.7165	15.7114	15.6001	15.9616
A0FGR8	A0FGR8	ESYT2_HUMAN	ESYT2	Extended synaptotagmin-2	Color2 [A=255, R=169, G=169, B=169]	1	4		18.5674	18.8608	18.8452	18.7385	18.8286	18.9226	18.9075	18.9515	19.0108	18.9046	18.9148	18.7616
A0JLT2	A0JLT2	MED19_HUMAN	MED19	Mediator of RNA polymerase II transcription subunit 19	Color2 [A=255, R=169, G=169, B=169]	1	4		14.9542	15.1351	15.6146	14.8922	15.7919	15.4286	15.4354	15.6011	15.6094	15.7071	15.949	15.277
A0MZ66	A0MZ66	SHOT1_HUMAN	SHTN1	Shootin-1	Color2 [A=255, R=169, G=169, B=169]	1	4		12.7343	13.3868	13.0927	13.0656	12.5689	13.3729	13.578	13.5574	12.6347	13.8969	13.7571	14.4008
A0PJW6	A0PJW6	TM223_HUMAN	TMEM223	Transmembrane protein 223	Color2 [A=255, R=169, G=169, B=169]	1	4		16.1166	16.5384	16.0381	16.1328	15.9399	16.0038	16.3113	15.8597	15.7992	15.9152	16.0371	16.1916
A0PJZ3	A0PJZ3	GXLT2_HUMAN	GXYLT2	Glucoside xylosyltransferase 2	Color2 [A=255, R=169, G=169, B=169]	1	4		15.7067	15.3562	15.4578	15.2928	15.4715	15.2728	15.2335	15.4593	15.4186	15.8012	15.5614	15.5232
A0PK00	A0PK00	T120B_HUMAN	TMEM120B	Transmembrane protein 120B	Color2 [A=255, R=169, G=169, B=169]	1	4		14.6607	15.4493	15.4654	14.6891	14.7572	15.7236	15.0964	16.1547	15.4203	15.0907	14.8744	14.3199
A1A4S6	A1A4S6	RHG10_HUMAN	ARHGAP10	Rho GTPase-activating protein 10	Color2 [A=255, R=169, G=169, B=169]	1	4		13.8146	14.7435	14.2437	14.7811	14.3445	15.3334	15.4941	15.4055	14.8586	15.2072	15.1445	15.2773
A1L020	A1L020	MEX3A_HUMAN	MEX3A	RNA-binding protein MEX3A	Color2 [A=255, R=169, G=169, B=169]	1	4		17.5677	17.8799	18.1655	17.8662	17.9503	17.9882	18.0807	17.7603	17.9647	18.458	18.4111	18.5534
A1L020;Q5U5Q3;Q86XN8	Q5U5Q3;Q6ZN04;Q86XN8;A1L020	MEX3A_HUMAN;MEX3C_HUMAN;MEX3D_HUMAN	MEX3A;MEX3C;MEX3D	RNA-binding protein MEX3A	Color2 [A=255, R=169, G=169, B=169]	1	4		15.6607	15.6146	16.1392	16.3294	16.1179	16.3309	16.4183	16.5068	16.2513	16.9094	16.7937	16.6629
A1L0T0	A1L0T0	HACL2_HUMAN	ILVBL	2-hydroxyacyl-CoA lyase 2	Color2 [A=255, R=169, G=169, B=169]	1	4		19.4125	19.6225	19.5707	19.539	19.672	19.6292	19.8547	19.7449	19.6744	19.6371	19.5784	19.5868
A1L170	A1L170	CA226_HUMAN	C1orf226	Uncharacterized protein C1orf226	Color2 [A=255, R=169, G=169, B=169]	1	4		14.647	14.3104	14.2568	14.5455	14.9858	15.8039	15.5113	14.6997	14.5897	15.9917	15.5023	15.5599
A1L188	A1L188	NDUF8_HUMAN	NDUFAF8	NADH dehydrogenase [ubiquinone] 1 alpha subcomplex assembly factor 8	Color2 [A=255, R=169, G=169, B=169]	1	4		14.6898	14.2425	13.53	13.6193	14.9945	14.8325	14.6507	14.6691	13.6132	14.3193	14.1494	14
A1L390	A1L390	PKHG3_HUMAN	PLEKHG3	Pleckstrin homology domain-containing family G member 3	Color2 [A=255, R=169, G=169, B=169]	1	4		12.3048	13.0955	13.5439	12.7768	14.1244	14.1284	14.2464	14.1693	13.5296	13.9712	14.4188	14.5878
A1X283	A1X283	SPD2B_HUMAN	SH3PXD2B	SH3 and PX domain-containing protein 2B	Color2 [A=255, R=169, G=169, B=169]	1	4		15.2862	15.5754	15.2447	14.7594	15.4918	15.5312	16.4198	15.714	15.8139	16.3612	16.2785	16.5652
A1X283;Q5TCZ1	A1X283;Q5TCZ1	SPD2A_HUMAN;SPD2B_HUMAN	SH3PXD2A;SH3PXD2B	SH3 and PX domain-containing protein 2B	Color2 [A=255, R=169, G=169, B=169]	1	4		15.914	16.5574	16.3704	16.7615	16.692	17.1946	16.8773	16.0055	16.7749	17.3937	17.6393	17.5794
A1YPR0	A1YPR0	ZBT7C_HUMAN	ZBTB7C	Zinc finger and BTB domain-containing protein 7C	Color2 [A=255, R=169, G=169, B=169]	1	4		11.5171	12.1615	10.7281	10.7347	12.3849	13.8702	13.9949	12.6735	9.70427	12.8708	12.8889	13.4863
A2A2Y4	A2A2Y4	FRMD3_HUMAN	FRMD3	FERM domain-containing protein 3	Color2 [A=255, R=169, G=169, B=169]	1	4		14.5369	13.4376	12.3981	12.3207	13.9539	14.7945	14.6681	14.762	14.6409	14.4679	14.7429	13.5071
A2A3K4	A2A3K4	PTPC1_HUMAN	PTPDC1	Protein tyrosine phosphatase domain-containing protein 1	Color2 [A=255, R=169, G=169, B=169]	1	4		9.16397	11.9738	10.7644	10.5779	11.6217	13.0006	10.3295	12.1098	11.0929	11.4966	11.5353	13.045
A2AJT9	A2AJT9	BCLA3_HUMAN	BCLAF3	BCLAF1 and THRAP3 family member 3	Color2 [A=255, R=169, G=169, B=169]	1	4		15.2809	15.3703	15.6947	15.6739	15.7123	16.2362	16.0103	15.7849	15.155	16.1657	16.0687	15.6665
A2RRP1	A2RRP1	NBAS_HUMAN	NBAS	NBAS subunit of NRZ tethering complex	Color2 [A=255, R=169, G=169, B=169]	1	4		18.6183	18.908	18.7942	18.6328	18.5365	18.637	18.6881	18.7045	18.6631	18.648	18.5487	18.3578
A2RTX5	A2RTX5	SYTC2_HUMAN	TARS3	Threonine--tRNA ligase 2, cytoplasmic	Color2 [A=255, R=169, G=169, B=169]	1	4		15.2623	15.4361	14.914	14.4645	15.7561	15.2701	15.2654	15.5728	15.6579	15.231	15.5719	15.289
A2RTX5;P26639	A2RTX5;P26639	SYTC2_HUMAN;SYTC_HUMAN	TARS1;TARS3	Threonine--tRNA ligase 2, cytoplasmic	Color2 [A=255, R=169, G=169, B=169]	1	4		14.7771	16.2388	15.7122	10.8962	16.0251	16.6574	14.3971	16.5318	15.8222	17.4202	17.1746	17.3329
A2RU67	A2RU67	F234B_HUMAN	FAM234B	Protein FAM234B	Color2 [A=255, R=169, G=169, B=169]	1	4		16.6789	16.5756	16.6088	16.8234	16.7027	16.0678	16.6126	16.2783	16.4206	16.4077	16.5849	16.5613
A2VDJ0	A2VDJ0	T131L_HUMAN	TMEM131L	Transmembrane protein 131-like	Color2 [A=255, R=169, G=169, B=169]	1	4		14.8507	15.0506	14.791	15.0045	15.0581	14.8597	15.0553	14.9671	14.6976	15.3422	15.1137	15.0486
A3KMH1	A3KMH1	VWA8_HUMAN	VWA8	von Willebrand factor A domain-containing protein 8	Color2 [A=255, R=169, G=169, B=169]	1	4		22.7942	22.3055	22.4201	22.4413	22.4792	22.1951	22.3608	22.366	22.561	22.0636	21.8684	21.8149
A3KN83;Q9Y2G9	Q9Y2G9;A3KN83	SBNO1_HUMAN;SBNO2_HUMAN	SBNO1;SBNO2	Protein strawberry notch homolog 1	Color2 [A=255, R=169, G=169, B=169]	1	4		10.4416	13.0603	11.8747	12.3892	13.6469	13.6662	13.4553	12.997	10.0345	13.044	12.3035	13.7361
A4D1E9	A4D1E9	GTPBA_HUMAN	GTPBP10	GTP-binding protein 10	Color2 [A=255, R=169, G=169, B=169]	1	4		22.7101	22.2036	22.2967	22.3888	22.7463	22.3811	22.6226	22.6002	22.7025	22.187	22.0335	21.9371
A4D1P6	A4D1P6	WDR91_HUMAN	WDR91	WD repeat-containing protein 91	Color2 [A=255, R=169, G=169, B=169]	1	4		11.0339	12.8911	13.6517	13.0415	12.9995	13.1066	11.594	13.3637	13.5339	13.7914	13.2841	13.7615
A4D1S0	A4D1S0	KLRG2_HUMAN	KLRG2	Killer cell lectin-like receptor subfamily G member 2	Color2 [A=255, R=169, G=169, B=169]	1	4		10.9183	11.2518	11.1235	10.7998	11.9166	8.49108	10.8085	12.5078	12.0727	12.7779	12.8968	12.9958
A4D1U4	A4D1U4	DEN11_HUMAN	DENND11	DENN domain-containing protein 11	Color2 [A=255, R=169, G=169, B=169]	1	4		14.9407	14.9462	14.9621	14.758	15.4361	16.0214	15.7614	16.0347	16.0073	15.6836	15.1827	15.2889
A4FU01	A4FU01	MTMRB_HUMAN	MTMR11	Myotubularin-related protein 11	Color2 [A=255, R=169, G=169, B=169]	1	4		18.5751	18.6016	18.3897	18.4191	18.6317	18.0568	18.6176	18.3506	18.8273	18.4787	18.6877	18.8875
A4FU28;P0CG41;Q8IX94	A4D2H0;A4FU28;P0CG41;Q86UF2;Q8IX94	CTGE4_HUMAN;CTGE8_HUMAN;CTGE9_HUMAN	CTAGE4;CTAGE8;CTAGE9	cTAGE family member 9	Color2 [A=255, R=169, G=169, B=169]	1	4		11.9962	11.7545	9.59051	11.0146	10.4102	11.16	11.2596	12.9456	10.1019	10.5998	11.3211	13.8174
A5PL33	A5PL33	KRBA1_HUMAN	KRBA1	Protein KRBA1	Color2 [A=255, R=169, G=169, B=169]	1	4		13.513	13.8086	14.4225	13.5349	13.9951	14.1727	10.6576	13.5668	9.99949	13.859	14.0549	13.9144
A5PLL7	A5PLL7	PDES1_HUMAN	PEDS1	Plasmanylethanolamine desaturase	Color2 [A=255, R=169, G=169, B=169]	1	4		14.4677	13.1558	13.0976	13.6134	13.8255	13.221	12.3913	13.7096	13.4523	13.9658	14.3393	12.9163
A5PLN9	A5PLN9	TPC13_HUMAN	TRAPPC13	Trafficking protein particle complex subunit 13	Color2 [A=255, R=169, G=169, B=169]	1	4		14.5137	15.1289	10.3322	13.9293	14.5204	14.7764	15.3438	15.0864	15.0609	15.0027	14.517	14.7366
A5YKK6	A5YKK6	CNOT1_HUMAN	CNOT1	CCR4-NOT transcription complex subunit 1	Color2 [A=255, R=169, G=169, B=169]	1	4		14.7558	15.0881	14.8215	15.024	14.5092	15.1456	14.9424	15.1438	14.7376	15.2109	15.3718	15.3486
A6H8Y1	A6H8Y1	BDP1_HUMAN	BDP1	Transcription factor TFIIIB component B'' homolog	Color2 [A=255, R=169, G=169, B=169]	1	4		12.8167	13.1536	12.7351	13.1606	12.4432	13.4501	13.0203	12.3412	11.8644	13.5506	13.6931	13.2168
A6NCE7;Q9GZQ8	Q9GZQ8;Q9H492;A6NCE7	MLP3B_HUMAN;MP3B2_HUMAN	MAP1LC3B;MAP1LC3B2	Microtubule-associated proteins 1A/1B light chain 3 beta 2	Color2 [A=255, R=169, G=169, B=169]	1	4		9.87945	13.556	11.4355	14.0309	14.1822	14.5907	14.5686	14.8561	11.9285	13.5031	13.7926	14.3398
A6NCS6	A6NCS6	CB072_HUMAN	C2orf72	Uncharacterized protein C2orf72	Color2 [A=255, R=169, G=169, B=169]	1	4		10.9243	12.1915	11.385	10.9427	11.7747	12.0693	12.7142	11.0451	13.2644	13.6278	12.2866	12.8947
A6NDB9	A6NDB9	PALM3_HUMAN	PALM3	Paralemmin-3	Color2 [A=255, R=169, G=169, B=169]	1	4		10.9201	11.0444	10.2691	11.1561	11.4695	12.3098	11.0732	13.1601	12.1426	11.4731	13.1632	13.1956
A6NDE4;A6NEQ0;P0C7P1;P0DJD3;P0DJD4;Q15415	A6NDE4;P0DJD3;Q15415;A6NEQ0;P0C7P1;P0DJD4	RBY1A_HUMAN;RBY1B_HUMAN;RBY1C_HUMAN;RBY1D_HUMAN;RBY1E_HUMAN;RBY1F_HUMAN	RBMY1A1;RBMY1B;RBMY1C;RBMY1D;RBMY1E;RBMY1J	RNA-binding motif protein, Y chromosome, family 1 member B	Color2 [A=255, R=169, G=169, B=169]	1	4		15.6575	15.5345	15.4366	15.6023	15.3397	16.0566	15.9414	16.0687	14.3387	16.2569	15.7208	15.0031
A6NDR6;O00470;O14770	O00470;O14770;Q99687;A6NDR6;A8K0S8	ME3L1_HUMAN;MEIS1_HUMAN;MEIS2_HUMAN	MEIS1;MEIS2;MEIS3P1	Putative homeobox protein Meis3-like 1	Color2 [A=255, R=169, G=169, B=169]	1	4		11.9069	13.3851	12.8633	14.2017	11.9758	13.4639	12.1424	13.6523	12.565	13.1522	12.2496	12.9787
A6NDU8	A6NDU8	RIMC1_HUMAN	RIMOC1	RAB7A-interacting MON1-CCZ1 complex subunit 1	Color2 [A=255, R=169, G=169, B=169]	1	4		14.8743	14.8925	14.5402	15.0068	15.1779	15.1101	15.2508	14.9048	15.2436	15.4049	15.6747	14.9253
A6NED2	A6NED2	RCCD1_HUMAN	RCCD1	RCC1 domain-containing protein 1	Color2 [A=255, R=169, G=169, B=169]	1	4		13.3878	12.0591	13.9175	12.8893	13.1704	13.8044	12.6755	12.1501	11.0588	14.605	14.1453	14.1454
A6NF01	A6NF01	P121B_HUMAN	POM121B	Putative nuclear envelope pore membrane protein POM 121B	Color2 [A=255, R=169, G=169, B=169]	1	4		10.6169	12.6508	10.6594	12.4723	12.5055	11.3271	12.081	8.76662	11.4386	11.4138	12.9023	12.4194
A6NF01;A8CG34	A8CG34;A6NF01	P121B_HUMAN;P121C_HUMAN	POM121B;POM121C	Putative nuclear envelope pore membrane protein POM 121B	Color2 [A=255, R=169, G=169, B=169]	1	4		15.6139	15.7068	16.034	15.6729	16.3997	15.3957	15.7697	15.1749	15.7322	15.7936	15.9009	15.181
A6NF01;A8CG34;Q96HA1	A8CG34;Q96HA1;A6NF01	P121A_HUMAN;P121B_HUMAN;P121C_HUMAN	POM121;POM121B;POM121C	Putative nuclear envelope pore membrane protein POM 121B	Color2 [A=255, R=169, G=169, B=169]	1	4		17.172	18.1126	17.5312	18.0895	17.7044	18.272	18.1953	17.4478	17.5963	18.0714	17.9042	17.8321
A6NF34	A6NF34	ANTRL_HUMAN	ANTXRL	Anthrax toxin receptor-like	Color2 [A=255, R=169, G=169, B=169]	1	4		16.6409	15.8748	16.8	17.7257	16.8143	15.452	16.4734	17.2464	16.3155	16.9289	16.7047	17.6902
A6NFI3	A6NFI3	ZN316_HUMAN	ZNF316	Zinc finger protein 316	Color2 [A=255, R=169, G=169, B=169]	1	4		15.0632	15.2126	15.6998	15.1579	15.6764	16.2921	16.4097	16.3297	15.6186	16.2221	16.5154	15.9987
A6NFN3;O43251	O43251;Q9NWB1;A6NFN3	RFOX2_HUMAN;RFOX3_HUMAN	RBFOX2;RBFOX3	RNA binding protein fox-1 homolog 3	Color2 [A=255, R=169, G=169, B=169]	1	4		16.7923	16.9554	16.7304	17.3238	16.4304	16.5376	16.8145	16.7605	16.7712	16.9009	16.7686	16.1802
A6NFY7	A6NFY7	SDHF1_HUMAN	SDHAF1	Succinate dehydrogenase assembly factor 1, mitochondrial	Color2 [A=255, R=169, G=169, B=169]	1	4		13.7341	14.7961	14.4505	14.0196	13.8266	13.3347	13.7493	13.988	14.4806	14.6161	14.281	13.9607
A6NHQ2	A6NHQ2	FBLL1_HUMAN	FBLL1	rRNA/tRNA 2'-O-methyltransferase fibrillarin-like protein 1	Color2 [A=255, R=169, G=169, B=169]	1	4		23.0559	23.3528	23.6603	23.3017	23.9181	23.8479	23.616	23.8128	23.7238	23.608	23.5829	23.5811
A6NHQ2;P22087	P22087;A6NHQ2	FBLL1_HUMAN;FBRL_HUMAN	FBL;FBLL1	rRNA/tRNA 2'-O-methyltransferase fibrillarin-like protein 1	Color2 [A=255, R=169, G=169, B=169]	1	4		22.797	22.8944	22.7504	22.548	22.8488	22.7897	22.8826	22.7809	22.68	22.6594	22.6296	22.6241
A6NHQ4	A6NHQ4	EPOP_HUMAN	EPOP	Elongin BC and Polycomb repressive complex 2-associated protein	Color2 [A=255, R=169, G=169, B=169]	1	4		13.9634	20.5111	20.6236	20.3494	14.8146	21.4104	20.9438	20.8216	13.9305	20.3727	20.4598	19.9866
A6NHR9	A6NHR9	SMHD1_HUMAN	SMCHD1	Structural maintenance of chromosomes flexible hinge domain-containing protein 1	Color2 [A=255, R=169, G=169, B=169]	1	4		16.5419	18.6256	18.5187	18.5331	17.3105	18.967	18.5685	18.6025	17.2516	18.7726	18.7945	18.6969
A6NI47;Q6S545;Q6S5H5	Q6S545;Q6S5H5;A6NI47	POTEG_HUMAN;POTEH_HUMAN;POTEM_HUMAN	POTEG;POTEH;POTEM	Putative POTE ankyrin domain family member M	Color2 [A=255, R=169, G=169, B=169]	1	4		13.6712	14.5208	11.5714	15.1022	14.0702	14.5128	14.6077	14.5111	12.1414	14.4827	14.0104	13.1048
A6NI72;P14598	P14598;A6NI72	NCF1B_HUMAN;NCF1_HUMAN	NCF1;NCF1B	Putative neutrophil cytosol factor 1B	Color2 [A=255, R=169, G=169, B=169]	1	4		10.1827	11.6783	10.1907	11.6443	11.9384	10.5741	12.0375	10.3779	12.1646	10.4607	11.0679	10.7462
A6NJ78	A6NJ78	MET15_HUMAN	METTL15	12S rRNA N4-methylcytidine (m4C) methyltransferase	Color2 [A=255, R=169, G=169, B=169]	1	4		20.1618	19.6735	19.7945	19.8933	19.8919	19.5175	19.8106	19.7977	19.9042	19.5027	19.3466	19.3931
A6NJT0	A6NJT0	UNC4_HUMAN	UNCX	Homeobox protein unc-4 homolog	Color2 [A=255, R=169, G=169, B=169]	1	4		13.7774	14.2649	13.9988	14.7351	14.7408	14.8405	11.708	14.2904	14.2535	15.1231	13.954	14.6552
A6NJT0;P54821;Q15699;Q9H161	O14813;O15266;O60902;P54821;Q15699;Q5XKR4;Q8N693;Q96IS3;Q96QS3;Q99453;Q9H161;Q9Y2V3;A6NJT0;A6NNA5;O95076;Q99811	ALX1_HUMAN;ALX4_HUMAN;PRRX1_HUMAN;UNC4_HUMAN	ALX1;ALX4;PRRX1;UNCX	Homeobox protein unc-4 homolog	Color2 [A=255, R=169, G=169, B=169]	1	4		11.4105	13.9701	11.7484	13.2768	13.5453	15.0523	14.2169	14.2522	10.8687	14.3264	14.116	15.194
A6NK58	A6NK58	LIPT2_HUMAN	LIPT2	Putative lipoyltransferase 2, mitochondrial	Color2 [A=255, R=169, G=169, B=169]	1	4		15.422	14.9623	14.5879	15.1381	15.0408	15.4289	13.9134	14.7946	14.9589	15.1157	14.3401	14.7235
A6NKD9	A6NKD9	CC85C_HUMAN	CCDC85C	Coiled-coil domain-containing protein 85C	Color2 [A=255, R=169, G=169, B=169]	1	4		11.7689	13.1129	14.2182	13.7285	13.0312	13.8558	13.8095	13.4464	11.8161	14.3151	14.2109	14.2157
A6NL88	A6NL88	SHSA7_HUMAN	SHISA7	Protein shisa-7	Color2 [A=255, R=169, G=169, B=169]	1	4		14.2044	14.5828	15.0441	14.5909	14.3842	13.9733	13.9763	13.3036	14.1321	14.668	14.1908	13.9924
A6NMD2;P0CJ92	A6NC78;H3BSY2;A6NMD2;D6RF30;H3BQL2;P0CJ92	GOG8H_HUMAN;GOG8J_HUMAN	GOLGA8H;GOLGA8J	Golgin subfamily A member 8J	Color2 [A=255, R=169, G=169, B=169]	1	4		10.987	13.2379	14.3318	10.9876	13.4055	13.1438	13.4432	13.1831	11.4508	13.1201	12.0128	12.843
A6NMK7;O95639	O95639;A6NMK7	CPS4L_HUMAN;CPSF4_HUMAN	CPSF4;CPSF4L	Putative cleavage and polyadenylation specificity factor subunit 4-like protein	Color2 [A=255, R=169, G=169, B=169]	1	4		16.2527	15.3702	14.652	16.8078	16.1432	16.2848	16.4714	16.3526	16.0311	16.0824	15.8033	15.7829
A6NNA2	A6NNA2	SRRM3_HUMAN	SRRM3	Serine/arginine repetitive matrix protein 3	Color2 [A=255, R=169, G=169, B=169]	1	4		14.662	14.9029	15.5454	15.0918	16.153	15.7132	15.574	15.2196	15.7019	16.3053	16.4173	16.3212
A6NNC1	A6NNC1	P12LL_HUMAN		Putative POM121-like protein 1-like	Color2 [A=255, R=169, G=169, B=169]	1	4		13.6844	14.2735	14.3243	12.8647	13.9788	14.4259	13.6226	14.3832	13.2708	13.668	13.1906	12.9737
A6NNH2	A6NNH2	F90AR_HUMAN	FAM90A27P	Protein FAM90A27P	Color2 [A=255, R=169, G=169, B=169]	1	4		12.7105	12.1271	11.2542	9.50084	12.2058	7.51986	14.1382	13.1723	11.7622	11.1522	12.2197	11.4521
A6NNL5	A6NNL5	CO061_HUMAN	C15orf61	Uncharacterized protein C15orf61	Color2 [A=255, R=169, G=169, B=169]	1	4		18.0351	17.8437	17.4286	17.9222	18.0342	18.0418	18.4104	18.5103	17.7745	17.8188	17.6034	17.2051
A6NNY8	A6NNY8	UBP27_HUMAN	USP27X	Ubiquitin carboxyl-terminal hydrolase 27	Color2 [A=255, R=169, G=169, B=169]	1	4		10.7194	9.63823	9.53553	10.2826	11.0746	11.1578	10.7718	11.23	10.5689	10.8888	11.0232	10.3228
A6NNY8;Q9UPT9	A6NNY8;Q9UPT9	UBP22_HUMAN;UBP27_HUMAN	USP22;USP27X	Ubiquitin carboxyl-terminal hydrolase 27	Color2 [A=255, R=169, G=169, B=169]	1	4		13.9767	15.0837	14.8116	14.5566	14.9466	15.5557	15.1874	15.3355	14.2345	15.8946	15.7815	16.0764
A6ZKI3	A6ZKI3;Q17RB0	RTL8C_HUMAN	RTL8C	Retrotransposon Gag-like protein 8C	Color2 [A=255, R=169, G=169, B=169]	1	4		16.7496	18.8443	18.3912	18.6825	17.7247	18.3818	18.7425	18.9059	18.2295	18.3897	18.9245	18.6306
A6ZKI3;Q9BWD3	A6ZKI3;Q17RB0;Q9BWD3	RTL8A_HUMAN;RTL8C_HUMAN	RTL8A;RTL8C	Retrotransposon Gag-like protein 8C	Color2 [A=255, R=169, G=169, B=169]	1	4		16.6686	16.2258	16.3977	17.1366	16.7131	16.5965	17.1493	17.3795	16.3504	16.9045	16.9604	16.4635
A7E2V4	A7E2V4	ZSWM8_HUMAN	ZSWIM8	Zinc finger SWIM domain-containing protein 8	Color2 [A=255, R=169, G=169, B=169]	1	4		12.8373	11.8192	12.6409	12.4685	12.4707	13.4319	13.8085	13.5066	12.1324	13.8136	13.169	13.5849
A7KAX9	A7KAX9	RHG32_HUMAN	ARHGAP32	Rho GTPase-activating protein 32	Color2 [A=255, R=169, G=169, B=169]	1	4		16.2812	16.2349	16.5117	16.4472	16.4743	16.4757	16.5148	16.3184	15.6416	16.6506	16.5996	16.5732
A7KAX9;O14559	A7KAX9;O14559	RHG32_HUMAN;RHG33_HUMAN	ARHGAP32;ARHGAP33	Rho GTPase-activating protein 32	Color2 [A=255, R=169, G=169, B=169]	1	4		13.193	14.1057	13.7556	12.9967	12.1691	13.7692	13.3175	11.611	11.8411	13.5484	12.9584	13.2268
A7MBM2	A7MBM2	DISP2_HUMAN	DISP2	Protein dispatched homolog 2	Color2 [A=255, R=169, G=169, B=169]	1	4		14.9806	14.9081	15.1519	15.3097	14.6253	15.2125	15.0002	15.1879	15.1457	15.5436	15.5624	15.4691
A7MCY6	A7MCY6	TBKB1_HUMAN	TBKBP1	TANK-binding kinase 1-binding protein 1	Color2 [A=255, R=169, G=169, B=169]	1	4		9.64634	11.3033	11.7137	11.4866	12.9345	11.8361	12.3933	12.5674	10.1813	12.5379	12.8558	12.1651
A7MD48	A7MD48	SRRM4_HUMAN	SRRM4	Serine/arginine repetitive matrix protein 4	Color2 [A=255, R=169, G=169, B=169]	1	4		11.7944	12.1392	13.7873	12.7524	12.241	11.9793	13.8746	12.8234	11.9872	13.4746	12.4233	12.9213
A7XYQ1	A7XYQ1	SOBP_HUMAN	SOBP	Sine oculis-binding protein homolog	Color2 [A=255, R=169, G=169, B=169]	1	4		9.97799	13.8223	14.0281	14.0075	13.339	13.9101	12.3213	13.1845	11.7144	13.7766	13.5023	12.6008
A8CG34	A8CG34	P121C_HUMAN	POM121C	Nuclear envelope pore membrane protein POM 121C	Color2 [A=255, R=169, G=169, B=169]	1	4		15.1545	16.7786	16.6611	17.2495	16.8621	17.1504	16.7729	16.8594	15.9543	17.1765	16.7563	17.144
A8CG34;Q96HA1	A8CG34;Q96HA1;Q6PJE2	P121A_HUMAN;P121C_HUMAN	POM121;POM121C	Nuclear envelope pore membrane protein POM 121C	Color2 [A=255, R=169, G=169, B=169]	1	4		17.9246	18.7552	18.5051	18.8033	18.4494	18.6509	18.4897	18.3429	17.9787	18.6733	18.5769	18.4828
A8K0Z3;A8MWX3;C4AMC7;Q6VEQ5;Q9NQA3	A8K0Z3;A8MWX3;C4AMC7;Q6VEQ5;Q9NQA3	WASH1_HUMAN;WASH2_HUMAN;WASH3_HUMAN;WASH4_HUMAN;WASH6_HUMAN	WASH2P;WASH3P;WASH4P;WASH6P;WASHC1	WASH complex subunit 1	Color2 [A=255, R=169, G=169, B=169]	1	4		10.6767	11.759	15.0478	13.3363	10.3112	12.578	13.3064	12.7209	13.9493	13.4519	10.9935	13.0235
A8K2U0	A8K2U0	A2ML1_HUMAN	A2ML1	Alpha-2-macroglobulin-like protein 1	Color2 [A=255, R=169, G=169, B=169]	1	4		16.8956	17.0743	16.8939	16.4939	16.7581	16.1211	16.7199	16.2745	17.0699	16.0149	16.9796	16.125
A8MQ14	A8MQ14	ZN850_HUMAN	ZNF850	Zinc finger protein 850	Color2 [A=255, R=169, G=169, B=169]	1	4		10.5898	14.4765	14.3399	13.4622	14.04	14.7283	14.4752	13.5481	11.2323	14.5762	14.4456	14.2824
A8MQ14;C9JN71;P58317;Q32M78;Q3KP31;Q3ZCT1;Q6P280;Q6PG37;Q8N587;Q8NB42;Q8NEP9;Q8TAQ5;Q969W8;Q96LW9;Q96MU6;Q9HCL3;Q9NQX6;Q9UC07;Q9UJL9;Q9ULM2;Q9Y2G7	Q14585;Q3KNS6;Q6ZNG0;Q8NA42;Q8NDP4;Q8NDQ6;Q96BR6;Q9BUY5;Q9UC07;Q9UJL9;Q9ULM2;P15621;P17039;P58317;Q32M78;Q3ZCT1;Q3ZCX4;Q6ECI4;Q86UE3;Q8N7M2;Q8NEP9;Q8NHY6;Q8TAF7;Q8TAQ5;Q969W8;Q96LW9;Q96SK3;Q9BX82;Q9H7R0;Q147U1;Q3KP31;Q494X3;Q6P280;Q6PG37;Q6ZSS3;Q7Z3V5;Q8N141;Q8N2I2;Q8N587;Q8N972;Q8N9F8;Q8N9K5;Q8NB42;Q8TA94;Q96MU6;Q96ND8;Q96NG8;Q96NI8;Q9H0M5;Q9HCL3;Q9NQX6;Q9Y2G7;A8MQ14;C9JN71;Q6PDB4	ZF69B_HUMAN;ZFP14_HUMAN;ZFP30_HUMAN;ZN121_HUMAN;ZN260_HUMAN;ZN331_HUMAN;ZN420_HUMAN;ZN490_HUMAN;ZN527_HUMAN;ZN529_HUMAN;ZN555_HUMAN;ZN561_HUMAN;ZN566_HUMAN;ZN699_HUMAN;ZN778_HUMAN;ZN790_HUMAN;ZN791_HUMAN;ZN850_HUMAN;ZN878_HUMAN;ZNF69_HUMAN;ZSC31_HUMAN	ZFP14;ZFP30;ZFP69B;ZNF121;ZNF260;ZNF331;ZNF420;ZNF490;ZNF527;ZNF529;ZNF555;ZNF561;ZNF566;ZNF69;ZNF699;ZNF778;ZNF790;ZNF791;ZNF850;ZNF878;ZSCAN31	Zinc finger protein 850	Color2 [A=255, R=169, G=169, B=169]	1	4		10.4503	10.6764	11.3742	10.5264	11.1898	11.8585	10.9796	11.4191	10.5542	11.4957	9.77195	11.5645
A8MQ14;O60765;O75346;P17097;P51523;Q15937;Q63HK3;Q8TF47;Q96IR2;Q96LW1;Q9H8G1;Q9NQZ8	Q8TF47;Q9NQZ8;O60765;O75346;P17097;Q15937;Q63HK3;Q8IYX0;Q8N4W9;Q8N823;Q9HCG1;A6NP11;P51523;Q8N9F8;Q96LW1;Q9H7R5;Q9H8G1;A0A1W2PQL4;A8MQ14;B4DXR9;Q6PDB4;Q96IR2	Z354A_HUMAN;Z354B_HUMAN;ZFP90_HUMAN;ZKSC2_HUMAN;ZN253_HUMAN;ZN430_HUMAN;ZN845_HUMAN;ZN850_HUMAN;ZNF71_HUMAN;ZNF79_HUMAN;ZNF7_HUMAN;ZNF84_HUMAN	ZFP90;ZKSCAN2;ZNF253;ZNF354A;ZNF354B;ZNF430;ZNF7;ZNF71;ZNF79;ZNF84;ZNF845;ZNF850	Zinc finger protein 850	Color2 [A=255, R=169, G=169, B=169]	1	4		11.5817	9.16766	13.6932	10.7325	11.2421	11.0805	11.7311	13.4947	11.4865	13.1399	11.7669	10.69
A8MQ14;Q9Y2G7	Q3KNS6;Q8NA42;Q8N972;Q8N9K5;Q9Y2G7;A8MQ14	ZFP30_HUMAN;ZN850_HUMAN	ZFP30;ZNF850	Zinc finger protein 850	Color2 [A=255, R=169, G=169, B=169]	1	4		11.8562	12.2023	11.3825	11.7627	12.2327	13.6555	12.708	13.9064	10.1487	14.3287	14.2049	12.7927
A8MQ27	A8MQ27	NEU1B_HUMAN	NEURL1B	E3 ubiquitin-protein ligase NEURL1B	Color2 [A=255, R=169, G=169, B=169]	1	4		10.311	11.7748	12.4743	11.1729	14.255	14.2787	14.5025	14.3562	14.381	14.2145	13.8647	14.2796
A8MTL9	A8MTL9	HMSD_HUMAN	HMSD	Serpin-like protein HMSD	Color2 [A=255, R=169, G=169, B=169]	1	4		11.6834	10.1438	11.1133	11.3771	9.68233	9.83087	11.2706	10.3533	9.0472	12.2155	11.1887	12.1208
A8MTY0	A8MTY0	ZN724_HUMAN	ZNF724	Zinc finger protein 724	Color2 [A=255, R=169, G=169, B=169]	1	4		11.5191	14.6525	13.9625	14.0731	13.3256	14.2931	13.6685	13.9808	13.3058	14.4591	14.6036	13.8282
A8MTY0;O43309;O75373;P17019;P17038;Q03936;Q05481;Q14593;Q15928;Q5JVG8;Q6ZN08;Q6ZR52;Q8IYN0;Q8TD23;Q8TF32;Q96H40;Q96N58;Q9H8G1;Q9UII5	O43309;Q03923;Q05481;Q15928;Q8TD23;Q96N58;A2RRD8;O75437;P17019;P17038;Q03936;Q14593;Q68DY1;Q6ZR52;Q8IYX0;Q8N4W9;Q96JC4;Q96N38;Q9UII5;Q9Y2Q1;A6NK75;A6NN14;A6NNF4;O75373;P0CB33;Q5JVG8;Q6ZN08;Q6ZNG1;Q8IYN0;Q8N7Q3;Q8NE65;Q8TF32;Q96H40;Q96N22;Q9BRH9;Q9H8G1;Q9P255;A0A1W2PQL4;A8MTY0;B4DXR9;P0DKX0	ZN100_HUMAN;ZN107_HUMAN;ZN141_HUMAN;ZN273_HUMAN;ZN430_HUMAN;ZN431_HUMAN;ZN486_HUMAN;ZN493_HUMAN;ZN506_HUMAN;ZN578_HUMAN;ZN675_HUMAN;ZN708_HUMAN;ZN724_HUMAN;ZN737_HUMAN;ZNF43_HUMAN;ZNF66_HUMAN;ZNF91_HUMAN;ZNF92_HUMAN;ZSC12_HUMAN	ZNF100;ZNF107;ZNF141;ZNF273;ZNF43;ZNF430;ZNF431;ZNF486;ZNF493;ZNF506;ZNF578;ZNF66;ZNF675;ZNF708;ZNF724;ZNF737;ZNF91;ZNF92;ZSCAN12	Zinc finger protein 724	Color2 [A=255, R=169, G=169, B=169]	1	4		15.9978	16.5424	17.1561	16.7344	16.135	16.9085	16.479	17.0018	16.337	16.7295	16.8049	16.8477
A8MTY0;O75373;P17019;P17038;Q05481	Q03923;Q05481;O43345;O75437;P17019;P17038;A6NK75;A6NNF4;A8MXY4;O75373;Q86V71;Q96N22;A8MTY0;P0DKX0	ZN708_HUMAN;ZN724_HUMAN;ZN737_HUMAN;ZNF43_HUMAN;ZNF91_HUMAN	ZNF43;ZNF708;ZNF724;ZNF737;ZNF91	Zinc finger protein 724	Color2 [A=255, R=169, G=169, B=169]	1	4		11.1431	10.8212	11.5242	11.2309	11.143	10.5199	12.4896	13.1222	11.4876	11.3581	11.6469	10.3087
A8MTY0;P17019	O43345;P17019;Q9HCG1;A6NK75;A6NN14;Q03924;Q86V71;Q8N7Q3;Q9P255;A8MTY0;P0DKX0	ZN708_HUMAN;ZN724_HUMAN	ZNF708;ZNF724	Zinc finger protein 724	Color2 [A=255, R=169, G=169, B=169]	1	4		12.1169	14.0002	13.6088	10.3704	10.3502	14.8714	14.4627	13.8096	9.78428	14.0167	13.4537	13.0522
A8MTY0;P17019;Q05481	Q03923;Q05481;O43345;O75437;P17019;P17038;A6NK75;A6NNF4;A8MXY4;O75373;Q86V71;Q96N22;A8MTY0;P0DKX0	ZN708_HUMAN;ZN724_HUMAN;ZNF91_HUMAN	ZNF708;ZNF724;ZNF91	Zinc finger protein 724	Color2 [A=255, R=169, G=169, B=169]	1	4		10.7185	11.2959	12.6307	11.0234	10.3861	9.44196	10.3923	11.0217	11.5018	11.7488	13.1939	11.7779
A8MTY0;P17019;Q14593	P17019;Q14593;A8MTY0	ZN273_HUMAN;ZN708_HUMAN;ZN724_HUMAN	ZNF273;ZNF708;ZNF724	Zinc finger protein 724	Color2 [A=255, R=169, G=169, B=169]	1	4		10.1197	11.6432	13.4599	13.6915	10.8835	10.1163	14.0566	11.2348	10.1549	13.9598	11.6943	12.7065
A8MTY0;Q03936;Q14593	Q03923;O75437;Q03936;Q14593;Q86V71;A8MTY0	ZN273_HUMAN;ZN724_HUMAN;ZNF92_HUMAN	ZNF273;ZNF724;ZNF92	Zinc finger protein 724	Color2 [A=255, R=169, G=169, B=169]	1	4		13.9119	15.1254	14.9346	14.927	14.1766	15.3959	15.2576	15.0482	13.0054	14.9222	15.4163	14.9236
A8MTY0;Q9H8G1	A6NK75;Q9H8G1;Q9P255;A8MTY0	ZN430_HUMAN;ZN724_HUMAN	ZNF430;ZNF724	Zinc finger protein 724	Color2 [A=255, R=169, G=169, B=169]	1	4		9.70019	12.3143	11.1493	14.8911	14.4214	13.9346	13.8251	13.0955	9.64119	14.3767	10.7039	11.6141
A8MUP2	A8MUP2	CSKMT_HUMAN	CSKMT	Citrate synthase-lysine N-methyltransferase CSKMT, mitochondrial	Color2 [A=255, R=169, G=169, B=169]	1	4		17.8181	16.9405	17.5593	17.5614	17.3993	17.2967	17.4602	17.1428	17.6027	16.9365	16.8153	16.7348
A8MVM7	A8MVM7	YD021_HUMAN		Putative uncharacterized protein ENSP00000382790	Color2 [A=255, R=169, G=169, B=169]	1	4		11.6394	14.6897	14.503	14.2348	11.5844	15.1329	15.006	14.8057	11.7025	14.9662	14.9192	14.8385
A8MVW0	A8MVW0	F1712_HUMAN	FAM171A2	Protein FAM171A2	Color2 [A=255, R=169, G=169, B=169]	1	4		15.3821	14.4978	15.3906	15.2674	15.4787	15.6341	15.7001	15.7587	16.1271	16.5409	16.4084	16.223
A8MVW0;Q5VUB5	Q5VUB5;A8MVW0	F1711_HUMAN;F1712_HUMAN	FAM171A1;FAM171A2	Protein FAM171A2	Color2 [A=255, R=169, G=169, B=169]	1	4		14.7097	15.3322	15.1578	15.0909	15.1206	15.5453	15.405	15.2994	15.3309	15.5114	15.5252	14.7538
A8MW92	A8MW92	P20L1_HUMAN	PHF20L1	PHD finger protein 20-like protein 1	Color2 [A=255, R=169, G=169, B=169]	1	4		13.2859	15.5561	15.8772	15.4419	14.7962	16.1695	15.8684	15.9398	14.99	16.248	16.1911	15.9512
A8MWD9;P62308	P62308;A8MWD9	RUXGL_HUMAN;RUXG_HUMAN	SNRPG;SNRPGP15	Putative small nuclear ribonucleoprotein G-like protein 15	Color2 [A=255, R=169, G=169, B=169]	1	4		18.8143	19.0769	18.9093	19.137	19.1882	18.9077	18.9459	18.9785	18.8725	19.2155	18.948	18.4356
A8MWL7;Q9NUH8	Q9NUH8;A8MWL7	TM14B_HUMAN;TM14D_HUMAN	TMEM14B;TMEM14DP	Transmembrane protein 14DP	Color2 [A=255, R=169, G=169, B=169]	1	4		12.7163	12.6884	12.8433	13.6759	13.0041	13.221	13.2777	12.766	13.8637	12.3886	13.0371	10.8718
A8MWY0	A8MWY0	ELAP2_HUMAN	ELAPOR2	Endosome/lysosome-associated apoptosis and autophagy regulator family member 2	Color2 [A=255, R=169, G=169, B=169]	1	4		14.2659	13.7742	14.0652	14.3666	14.1767	14.164	14.9606	14.8508	14.4981	14.668	14.7913	15.0824
A8MXV4	A8MXV4	NUD19_HUMAN	NUDT19	Acyl-coenzyme A diphosphatase NUDT19	Color2 [A=255, R=169, G=169, B=169]	1	4		18.5295	18.1579	18.3361	18.1281	17.8133	17.259	17.6208	17.8569	17.8028	17.5725	17.5003	17.6627
A8MYA2	A8MYA2	CX049_HUMAN	CXorf49B	Uncharacterized protein CXorf49	Color2 [A=255, R=169, G=169, B=169]	1	4		10.5088	11.248	11.3102	10.7295	12.6838	11.5292	11.1786	10.578	11.2225	11.5315	11.356	11.3213
A8MYB1	A8MYB1	TMC5B_HUMAN	TMCO5B	Transmembrane and coiled-coil domain-containing protein 5B	Color2 [A=255, R=169, G=169, B=169]	1	4		15.752	16.0999	10.964	15.7339	15.5171	15.795	15.2121	15.599	15.2923	15.5058	15.4104	11.4092
A8MYX2	B3EWG5;A8MYX2;B3EWG3;B3EWG6	FM25E_HUMAN	FAM25E	Protein FAM25E	Color2 [A=255, R=169, G=169, B=169]	1	4		10.7237	12.2845	10.495	12.9294	12.3344	14.2338	12.0112	12.4532	14.0729	13.0762	11.598	14.253
A9YTQ3	A9YTQ3	AHRR_HUMAN	AHRR	Aryl hydrocarbon receptor repressor	Color2 [A=255, R=169, G=169, B=169]	1	4		12.3036	13.9991	13.0168	11.7742	12.6958	14.1964	13.5369	13.7807	13.247	14.1122	14.5091	14.1455
A9YTQ3;P35869	A9YTQ3;P35869	AHRR_HUMAN;AHR_HUMAN	AHR;AHRR	Aryl hydrocarbon receptor repressor	Color2 [A=255, R=169, G=169, B=169]	1	4		10.6561	9.80226	11.7838	9.37527	13.908	15.5832	15.4215	15.478	14.4888	15.9118	16.0541	15.8283
B0YJ81	B0YJ81	HACD1_HUMAN	HACD1	Very-long-chain (3R)-3-hydroxyacyl-CoA dehydratase 1	Color2 [A=255, R=169, G=169, B=169]	1	4		13.6953	14.0445	13.162	8.89295	14.831	14.0482	14.5952	14.6556	14.5112	14.8383	14.1629	14.4064
B1APH4	B1APH4	ZN487_HUMAN	ZNF487	Putative zinc finger protein 487	Color2 [A=255, R=169, G=169, B=169]	1	4		10.1676	12.3982	11.8396	12.4998	10.7208	13.1639	13.0779	12.3216	12.1414	13.7407	12.0641	14.2137
B2CW77	B2CW77	KILIN_HUMAN	KLLN	Killin	Color2 [A=255, R=169, G=169, B=169]	1	4		13.4966	14.6234	13.6476	13.9805	14.2388	11.1203	14.5857	13.7564	14.422	14.2126	14.7696	13.6949
B2RTY4	B2RTY4	MYO9A_HUMAN	MYO9A	Unconventional myosin-IXa	Color2 [A=255, R=169, G=169, B=169]	1	4		14.6408	14.49	14.4226	13.5375	14.4004	12.7715	14.4654	15.3468	15.7961	14.7281	14.2394	14.9411
B2RXF0	B2RXF0	T229A_HUMAN	TMEM229A	Transmembrane protein 229A	Color2 [A=255, R=169, G=169, B=169]	1	4		12.5663	13.2672	12.415	9.18219	13.4748	11.4316	12.6953	13.2087	12.9483	11.9365	12.3971	12.1837
B5ME19;Q99613	Q99613;B5ME19	EIF3C_HUMAN;EIFCL_HUMAN	EIF3C;EIF3CL	Eukaryotic translation initiation factor 3 subunit C-like protein	Color2 [A=255, R=169, G=169, B=169]	1	4		14.4718	14.5885	15.2358	14.8368	14.9773	15.2686	14.9582	14.6759	14.6133	15.2372	15.206	15.3926
B7ZAP0;Q9Y3P9	Q9Y3P9;B7ZAP0	RBG10_HUMAN;RBGP1_HUMAN	RABGAP1;RABGAP1L	Rab GTPase-activating protein 1-like, isoform 10	Color2 [A=255, R=169, G=169, B=169]	1	4		11.628	13.0048	12.4446	13.6253	13.0812	14.5698	13.3513	13.4091	10.5593	13.0864	13.1991	13.2623
B7ZAQ6;P0CG08	B7ZAQ6;P0CG08	GPHRA_HUMAN;GPHRB_HUMAN	GPR89A;GPR89B	Golgi pH regulator A	Color2 [A=255, R=169, G=169, B=169]	1	4		16.5459	17.0616	16.5616	16.8774	16.8167	17.041	17.0599	17.2619	16.5322	16.5307	16.651	16.2392
C9JH25	C9JH25	PRRT4_HUMAN	PRRT4	Proline-rich transmembrane protein 4	Color2 [A=255, R=169, G=169, B=169]	1	4		10.5412	13.9215	13.6613	14.209	15.3257	15.2795	15.4372	15.3166	15.2926	15.5281	15.2573	15.5271
C9JLR9	C9JLR9	ZFTA_HUMAN	ZFTA	Zinc finger translocation-associated protein	Color2 [A=255, R=169, G=169, B=169]	1	4		13.0242	13.8225	13.6891	13.2733	13.7771	14.4074	14.4156	14.5004	13.1714	14.7238	14.4981	14.5528
C9JN71	C9JN71	ZN878_HUMAN	ZNF878	Zinc finger protein 878	Color2 [A=255, R=169, G=169, B=169]	1	4		11.0291	12.622	12.7889	13.3688	11.764	12.7088	13.5802	12.0253	11.5514	12.1523	13.6821	12.2129
C9JTQ0	C9JTQ0	ANR63_HUMAN	ANKRD63	Ankyrin repeat domain-containing protein 63	Color2 [A=255, R=169, G=169, B=169]	1	4		11.4181	12.6565	12.224	12.0316	13.6698	13.9925	13.3925	13.147	13.4584	13.6968	13.7684	13.5046
D6RIA3	D6RIA3	CD054_HUMAN	C4orf54	Uncharacterized protein C4orf54	Color2 [A=255, R=169, G=169, B=169]	1	4		14.1141	14.7202	14.6153	14.6364	15.0946	15.4027	15.3073	15.0098	14.2559	15.1528	15.0287	14.7903
E9PAV3	Q13765;E9PAV3	NACAM_HUMAN	NACA	Nascent polypeptide-associated complex subunit alpha, muscle-specific form	Color2 [A=255, R=169, G=169, B=169]	1	4		13.8119	13.6543	14.4993	14.2606	13.8054	14.0082	13.6574	14.4094	14.2414	14.626	14.6623	14.9309
E9PRG8	E9PRG8	CK098_HUMAN	C11orf98	Uncharacterized protein C11orf98	Color2 [A=255, R=169, G=169, B=169]	1	4		17.2193	17.9859	16.7204	17.0221	16.6122	16.2565	16.0574	16.1878	16.8182	16.3296	16.7022	16.5244
F2Z333	F2Z333	FND10_HUMAN	FNDC10	Fibronectin type III domain-containing protein 10	Color2 [A=255, R=169, G=169, B=169]	1	4		15.7483	15.6366	15.9786	15.8753	16.658	16.7497	16.7094	16.3727	16.0791	16.4511	16.1796	16.5008
H0YL14	H0YL14	TM250_HUMAN	TMEM250	Transmembrane protein 250	Color2 [A=255, R=169, G=169, B=169]	1	4		11.4989	9.77686	10.6866	10.689	11.7967	10.9723	9.84165	10.5137	10.9117	11.9547	11.0007	12.1871
H3BS89	H3BS89	T178B_HUMAN	TMEM178B	Transmembrane protein 178B	Color2 [A=255, R=169, G=169, B=169]	1	4		13.6331	11.6784	13.589	13.3866	12.7072	13.3001	13.9948	14.6715	14.6041	14.3843	13.2713	13.6366
I6L899	I6L899	GOG8R_HUMAN	GOLGA8R	Golgin subfamily A member 8R	Color2 [A=255, R=169, G=169, B=169]	1	4		10.853	11.7525	14.2319	10.2767	11.9486	11.6334	13.2146	12.7978	12.6715	13.7982	11.9394	15.1157
L0R6Q1	L0R6Q1	S35U4_HUMAN	SLC35A4	SLC35A4 upstream open reading frame protein	Color2 [A=255, R=169, G=169, B=169]	1	4		17.0313	17.0101	17.2162	17.1297	16.9668	16.8285	16.9658	16.877	17.2158	17.0378	16.8351	17.2172
L0R8F8	L0R8F8	MIDUO_HUMAN	MIEF1	MIEF1 upstream open reading frame protein	Color2 [A=255, R=169, G=169, B=169]	1	4		18.2277	18.0715	18.2658	18.3468	18.0921	18.1022	17.987	18.1083	18.4793	17.934	17.9074	17.9037
M5A8F1	M5A8F1	SUPYN_HUMAN	ERVH48-1	Suppressyn	Color2 [A=255, R=169, G=169, B=169]	1	4		18.6123	9.53438	18.1551	17.9415	18.3912	11.7621	11.4056	18.3954	18.0229	11.1604	12.0783	16.5482
O00116	O00116	ADAS_HUMAN	AGPS	Alkyldihydroxyacetonephosphate synthase, peroxisomal	Color2 [A=255, R=169, G=169, B=169]	1	4		19.8297	19.8573	19.8015	19.9172	20.3804	20.1798	20.234	20.1369	20.3628	20.3029	20.2374	20.231
O00124	O00124	UBXN8_HUMAN	UBXN8	UBX domain-containing protein 8	Color2 [A=255, R=169, G=169, B=169]	1	4		12.6444	11.0134	12.888	13.184	12.687	12.2519	14.1318	12.4035	12.4785	11.9762	12.6849	13.0333
O00139	O00139	KIF2A_HUMAN	KIF2A	Kinesin-like protein KIF2A	Color2 [A=255, R=169, G=169, B=169]	1	4		17.0444	17.3002	17.2559	17.3659	18.0662	18.7503	18.6787	18.4705	17.7213	18.6868	18.5501	18.5141
O00139;Q99661	O00139;Q99661	KIF2A_HUMAN;KIF2C_HUMAN	KIF2A;KIF2C	Kinesin-like protein KIF2A	Color2 [A=255, R=169, G=169, B=169]	1	4		16.0885	15.4563	16.8	16.4774	16.8325	17.6096	17.904	17.4906	17.3332	17.2758	17.7224	17.6174
O00142	O00142	KITM_HUMAN	TK2	Thymidine kinase 2, mitochondrial	Color2 [A=255, R=169, G=169, B=169]	1	4		17.8979	17.8598	17.5968	17.7329	17.5206	17.3951	17.317	17.619	17.1916	16.9086	16.7961	16.6474
O00144	O00144	FZD9_HUMAN	FZD9	Frizzled-9	Color2 [A=255, R=169, G=169, B=169]	1	4		12.9623	12.3595	12.7007	11.5358	11.4979	12.2337	10.7022	9.63575	12.2016	12.399	10.726	11.976
O00148	O00148	DX39A_HUMAN	DDX39A	ATP-dependent RNA helicase DDX39A	Color2 [A=255, R=169, G=169, B=169]	1	4		16.4829	16.5348	16.5654	16.6242	16.9498	16.6526	17.0132	17.1019	16.4627	16.9861	16.8379	17.3864
O00148;Q13838	O00148;Q13838	DX39A_HUMAN;DX39B_HUMAN	DDX39A;DDX39B	ATP-dependent RNA helicase DDX39A	Color2 [A=255, R=169, G=169, B=169]	1	4		19.8864	19.7729	20.0055	19.9882	20.0999	20.043	20.0314	19.9324	20.1192	20.3532	20.2523	20.5476
O00151	O00151	PDLI1_HUMAN	PDLIM1	PDZ and LIM domain protein 1	Color2 [A=255, R=169, G=169, B=169]	1	4		11.0802	11.6993	12.4603	12.2222	12.7921	12.4728	12.251	11.8586	12.7102	12.543	12.7582	13.4036
O00154	O00154	BACH_HUMAN	ACOT7	Cytosolic acyl coenzyme A thioester hydrolase	Color2 [A=255, R=169, G=169, B=169]	1	4		18.132	17.8535	17.528	17.4699	17.595	17.6979	17.7831	17.7397	17.9306	17.9046	17.8072	18.0949
O00159	O00159	MYO1C_HUMAN	MYO1C	Unconventional myosin-Ic	Color2 [A=255, R=169, G=169, B=169]	1	4		16.6153	17.168	16.9759	16.9795	17.7675	17.9692	17.9335	17.7133	16.9748	17.7911	17.8028	17.6935
O00161	O00161	SNP23_HUMAN	SNAP23	Synaptosomal-associated protein 23	Color2 [A=255, R=169, G=169, B=169]	1	4		15.5748	15.4082	15.5092	15.489	15.6191	15.8968	15.445	15.3395	15.6739	16.4664	16.0946	16.3543
O00165	O00165	HAX1_HUMAN	HAX1	HCLS1-associated protein X-1	Color2 [A=255, R=169, G=169, B=169]	1	4		20.7941	20.7554	20.6769	20.6458	20.6865	20.54	20.5987	20.5911	20.6892	20.2927	20.2134	20.0924
O00170	O00170	AIP_HUMAN	AIP	AH receptor-interacting protein	Color2 [A=255, R=169, G=169, B=169]	1	4		14.4722	13.8394	16.0205	14.7418	13.6408	13.9308	14.7011	12.473	13.3113	13.843	14.7889	14.4648
O00178	O00178	GTPB1_HUMAN	GTPBP1	GTP-binding protein 1	Color2 [A=255, R=169, G=169, B=169]	1	4		14.5762	15.1534	15.1763	15.0624	15.6691	15.5451	15.568	15.6667	15.5014	16.1599	16.5769	16.6872
O00186	O00186	STXB3_HUMAN	STXBP3	Syntaxin-binding protein 3	Color2 [A=255, R=169, G=169, B=169]	1	4		17.2729	17.1602	17.5363	17.5131	17.4126	17.7065	17.3992	17.55	17.3419	17.5279	17.6289	17.5611
O00189	O00189	AP4M1_HUMAN	AP4M1	AP-4 complex subunit mu-1	Color2 [A=255, R=169, G=169, B=169]	1	4		12.3727	11.0209	11.3412	11.5793	11.1161	11.3428	11.7965	12.2306	11.2182	11.7548	10.9777	11.8342
O00192	O00192	ARVC_HUMAN	ARVCF	Splicing regulator ARVCF	Color2 [A=255, R=169, G=169, B=169]	1	4		16.3628	16.5994	16.669	16.8174	16.748	17.1126	16.9887	16.9415	16.4614	17.3067	17.1297	17.1828
O00203	O00203	AP3B1_HUMAN	AP3B1	AP-3 complex subunit beta-1	Color2 [A=255, R=169, G=169, B=169]	1	4		13.5117	14.1227	13.9255	14.219	13.8677	14.2028	14.4425	14.7268	13.6427	14.0379	14.4706	14.7389
O00203;Q13367	O00203;Q13367	AP3B1_HUMAN;AP3B2_HUMAN	AP3B1;AP3B2	AP-3 complex subunit beta-1	Color2 [A=255, R=169, G=169, B=169]	1	4		14.844	14.8905	14.9771	14.9478	15.0795	14.7254	14.7669	14.8575	14.9969	15.4487	14.7386	15.4921
O00213	O00213	APBB1_HUMAN	APBB1	Amyloid beta precursor protein binding family B member 1	Color2 [A=255, R=169, G=169, B=169]	1	4		12.8716	12.9416	13.3303	13.6569	13.1176	14.1031	15.2093	13.2148	13.742	13.9732	14.1943	14.948
O00217	O00217	NDUS8_HUMAN	NDUFS8	NADH dehydrogenase [ubiquinone] iron-sulfur protein 8, mitochondrial	Color2 [A=255, R=169, G=169, B=169]	1	4		22.0996	21.6742	21.8465	21.8781	21.7497	21.5923	21.7412	21.7358	22.1943	21.5492	21.1176	21.1152
O00220	O00220	TR10A_HUMAN	TNFRSF10A	Tumor necrosis factor receptor superfamily member 10A	Color2 [A=255, R=169, G=169, B=169]	1	4		11.4711	12.5348	10.8774	10.1451	9.50474	11.7463	11.6479	10.5742	14.2266	13.0755	12.5517	13.44
O00231	O00231	PSD11_HUMAN	PSMD11	26S proteasome non-ATPase regulatory subunit 11	Color2 [A=255, R=169, G=169, B=169]	1	4		15.1637	15.3298	15.2499	15.1747	15.6816	15.8027	15.5656	15.8669	15.5776	15.9397	16.169	16.6783
O00232	O00232	PSD12_HUMAN	PSMD12	26S proteasome non-ATPase regulatory subunit 12	Color2 [A=255, R=169, G=169, B=169]	1	4		15.7003	15.6023	15.795	15.9123	15.9252	16.0869	16.335	16.2277	15.9885	16.5054	16.6574	16.5898
O00233	O00233	PSMD9_HUMAN	PSMD9	26S proteasome non-ATPase regulatory subunit 9	Color2 [A=255, R=169, G=169, B=169]	1	4		13.6248	11.8865	10.825	13.1659	13.6224	14.5694	13.2408	13.4711	14.3022	14.7243	14.8386	14.841
O00238	O00238	BMR1B_HUMAN	BMPR1B	Bone morphogenetic protein receptor type-1B	Color2 [A=255, R=169, G=169, B=169]	1	4		11.2024	12.4645	12.5533	12.7941	11.734	11.3958	12.2486	12.4519	11.1497	12.6401	12.5266	11.6273
O00255	O00255	MEN1_HUMAN	MEN1	Menin	Color2 [A=255, R=169, G=169, B=169]	1	4		18.4687	18.5887	18.6679	18.6156	18.2913	18.3693	18.4009	18.5399	18.3661	18.3515	18.2479	17.9102
O00257	O00257	CBX4_HUMAN	CBX4	E3 SUMO-protein ligase CBX4	Color2 [A=255, R=169, G=169, B=169]	1	4		17.5819	19.6505	19.5665	19.5723	17.721	20.6987	20.3229	20.2189	17.6208	19.2775	19.2134	18.8106
O00258	O00258	GET1_HUMAN	GET1	Guided entry of tail-anchored proteins factor 1	Color2 [A=255, R=169, G=169, B=169]	1	4		17.8039	18.1057	18.073	18.0603	17.8988	18.042	18.1568	18.4057	17.8376	17.808	17.7899	17.5527
O00264	O00264	PGRC1_HUMAN	PGRMC1	Membrane-associated progesterone receptor component 1	Color2 [A=255, R=169, G=169, B=169]	1	4		18.6733	18.8705	18.9147	18.8028	19.9636	19.7947	19.869	20.1857	20.0028	19.9231	19.7759	19.5074
O00264;O15173	O00264;O15173	PGRC1_HUMAN;PGRC2_HUMAN	PGRMC1;PGRMC2	Membrane-associated progesterone receptor component 1	Color2 [A=255, R=169, G=169, B=169]	1	4		14.7332	14.4153	12.1508	14.7763	11.1333	15.2089	15.1688	15.6588	15.1805	14.2339	16.3553	15.7214
O00267	O00267	SPT5H_HUMAN	SUPT5H	Transcription elongation factor SPT5	Color2 [A=255, R=169, G=169, B=169]	1	4		16.4797	16.7233	16.6496	16.7802	16.3614	16.4384	16.5516	16.3928	16.56	16.5831	16.5366	16.583
O00268	O00268	TAF4_HUMAN	TAF4	Transcription initiation factor TFIID subunit 4	Color2 [A=255, R=169, G=169, B=169]	1	4		16.9464	17.0076	17.2176	17.0272	17.5082	17.3683	16.9949	17.0317	17.6111	17.5803	17.7626	17.6341
O00268;Q92750	O00268;Q92750	TAF4B_HUMAN;TAF4_HUMAN	TAF4;TAF4B	Transcription initiation factor TFIID subunit 4	Color2 [A=255, R=169, G=169, B=169]	1	4		16.5478	10.0714	16.2893	16.19	16.2543	9.82487	14.2212	12.2118	16.757	16.7557	17.187	16.9731
O00273	O00273	DFFA_HUMAN	DFFA	DNA fragmentation factor subunit alpha	Color2 [A=255, R=169, G=169, B=169]	1	4		10.8796	11.1802	11.0794	13.6784	13.3901	12.773	13.0507	12.2164	11.0301	10.9136	12.5394	13.1304
O00287	O00287	RFXAP_HUMAN	RFXAP	Regulatory factor X-associated protein	Color2 [A=255, R=169, G=169, B=169]	1	4		11.8564	13.0963	12.5559	13.8153	11.774	13.6699	13.8961	12.4937	13.2516	14.1128	13.6066	14.6999
O00291	O00291	HIP1_HUMAN	HIP1	Huntingtin-interacting protein 1	Color2 [A=255, R=169, G=169, B=169]	1	4		15.1322	12.922	14.7091	14.3771	14.6822	15.0745	14.6031	14.5179	14.4093	15.7996	15.3545	15.1693
O00299	O00299	CLIC1_HUMAN	CLIC1	Chloride intracellular channel protein 1	Color2 [A=255, R=169, G=169, B=169]	1	4		15.7709	15.6604	15.9568	16.213	15.9573	16.4345	16.6482	16.5378	16.4625	16.8093	17.1669	17.773
O00303	O00303	EIF3F_HUMAN	EIF3F	Eukaryotic translation initiation factor 3 subunit F	Color2 [A=255, R=169, G=169, B=169]	1	4		14.3832	14.4196	14.5097	13.862	14.7054	14.4704	14.9586	14.7543	14.4986	14.3891	15.1901	15.3469
O00305	O00305	CACB4_HUMAN	CACNB4	Voltage-dependent L-type calcium channel subunit beta-4	Color2 [A=255, R=169, G=169, B=169]	1	4		14.1581	14.9011	15.18	14.3777	14.5365	14.5853	15.0978	14.4327	13.8833	14.9021	14.8174	13.6832
O00308	O00308	WWP2_HUMAN	WWP2	NEDD4-like E3 ubiquitin-protein ligase WWP2	Color2 [A=255, R=169, G=169, B=169]	1	4		13.7771	14.2299	13.0341	14.1166	14.4339	13.969	14.4163	14.1453	15.4143	15.0235	14.6856	14.9702
O00308;Q96J02;Q9H0M0	O00308;Q96J02;Q9H0M0	ITCH_HUMAN;WWP1_HUMAN;WWP2_HUMAN	ITCH;WWP1;WWP2	NEDD4-like E3 ubiquitin-protein ligase WWP2	Color2 [A=255, R=169, G=169, B=169]	1	4		13.0236	13.5374	10.189	14.6928	15.0387	13.7472	15.0288	15.3479	14.2227	14.6556	15.4691	14.3167
O00311	O00311	CDC7_HUMAN	CDC7	Cell division cycle 7-related protein kinase	Color2 [A=255, R=169, G=169, B=169]	1	4		15.3872	15.9646	16.0232	16.0973	15.5905	16.5203	16.29	16.2918	15.517	16.4791	16.467	16.5894
O00327	O00327	BMAL1_HUMAN	ARNTL	Aryl hydrocarbon receptor nuclear translocator-like protein 1	Color2 [A=255, R=169, G=169, B=169]	1	4		14.6367	14.6357	14.3062	10.4052	14.1936	14.6874	14.9784	14.5065	14.4091	14.7698	15.5082	14.7213
O00330	O00330	ODPX_HUMAN	PDHX	Pyruvate dehydrogenase protein X component, mitochondrial	Color2 [A=255, R=169, G=169, B=169]	1	4		19.506	19.2891	19.4172	19.4451	19.6108	19.4191	19.3831	19.4241	19.5913	19.1781	19.0837	18.9354
O00370	O00370	LORF2_HUMAN		LINE-1 retrotransposable element ORF2 protein	Color2 [A=255, R=169, G=169, B=169]	1	4		12.9923	13.5874	12.2446	14.1647	13.6764	12.5449	13.8409	13.781	12.6953	13.6031	13.2413	10.2808
O00391	O00391	QSOX1_HUMAN	QSOX1	Sulfhydryl oxidase 1	Color2 [A=255, R=169, G=169, B=169]	1	4		15.0475	14.9097	14.9297	15.4064	15.2612	15.414	15.4211	15.0844	15.2462	14.804	15.4395	15.2669
O00399	O00399	DCTN6_HUMAN	DCTN6	Dynactin subunit 6	Color2 [A=255, R=169, G=169, B=169]	1	4		13.7395	11.433	12.8025	13.6903	14.0347	12.1707	13.5065	13.4511	12.3574	13.0499	13.6285	14.3418
O00400	O00400	ACATN_HUMAN	SLC33A1	Acetyl-coenzyme A transporter 1	Color2 [A=255, R=169, G=169, B=169]	1	4		15.3615	15.3214	15.5077	15.2425	15.2484	15.4666	15.6815	15.7731	15.2766	15.1414	15.1089	14.6073
O00401	O00401	WASL_HUMAN	WASL	Actin nucleation-promoting factor WASL	Color2 [A=255, R=169, G=169, B=169]	1	4		11.2248	10.421	12.2514	10.9695	12.1796	12.86	11.5764	10.4646	10.9232	11.5884	10.3177	12.5111
O00408	O00408	PDE2A_HUMAN	PDE2A	cGMP-dependent 3',5'-cyclic phosphodiesterase	Color2 [A=255, R=169, G=169, B=169]	1	4		15.6126	15.9694	15.81	15.8564	15.6056	15.9494	15.885	15.8502	15.5017	15.7234	15.8273	15.7233
O00410	O00410	IPO5_HUMAN	IPO5	Importin-5	Color2 [A=255, R=169, G=169, B=169]	1	4		14.3549	14.8539	14.2357	14.8206	14.9963	15.3927	15.2484	15.3694	14.6667	14.9231	14.859	15.4008
O00410;O60518	O00410;O60518	IPO5_HUMAN;RNBP6_HUMAN	IPO5;RANBP6	Importin-5	Color2 [A=255, R=169, G=169, B=169]	1	4		14.3905	15.2374	13.8309	15.2892	15.6965	15.5311	16.3407	16.2322	14.6373	15.493	16.0194	14.7414
O00411	O00411	RPOM_HUMAN	POLRMT	DNA-directed RNA polymerase, mitochondrial	Color2 [A=255, R=169, G=169, B=169]	1	4		20.7902	20.4295	20.5146	20.5614	21.0053	20.7544	20.9377	20.9293	21.215	20.7789	20.5889	20.5453
O00418	O00418	EF2K_HUMAN	EEF2K	Eukaryotic elongation factor 2 kinase	Color2 [A=255, R=169, G=169, B=169]	1	4		13.1416	13.4269	10.8344	10.91	12.9339	13.7533	10.5381	12.9708	12.5358	13.4114	14.2325	13.6222
O00422	O00422	SAP18_HUMAN	SAP18	Histone deacetylase complex subunit SAP18	Color2 [A=255, R=169, G=169, B=169]	1	4		21.5176	21.5125	21.5298	21.4867	21.6641	21.7013	21.4009	21.4424	21.5863	21.5875	21.5746	21.6429
O00425	O00425	IF2B3_HUMAN	IGF2BP3	Insulin-like growth factor 2 mRNA-binding protein 3	Color2 [A=255, R=169, G=169, B=169]	1	4		18.3175	18.3686	18.5138	18.6598	18.2579	18.0651	18.2774	18.264	18.1331	18.6529	18.6238	18.7781
O00425;Q9NZI8;Q9Y6M1	O00425;Q9NZI8;Q9Y6M1	IF2B1_HUMAN;IF2B2_HUMAN;IF2B3_HUMAN	IGF2BP1;IGF2BP2;IGF2BP3	Insulin-like growth factor 2 mRNA-binding protein 3	Color2 [A=255, R=169, G=169, B=169]	1	4		16.5524	15.7923	16.3439	16.7662	16.4003	16.4503	16.3357	16.3066	16.7183	17.5862	17.2951	17.3438
O00429	O00429	DNM1L_HUMAN	DNM1L	Dynamin-1-like protein	Color2 [A=255, R=169, G=169, B=169]	1	4		14.5236	15.049	14.8159	15.2162	15.2543	15.0779	15.2435	15.2294	14.5949	15.2131	15.3255	15.9071
O00442	O00442	RTCA_HUMAN	RTCA	RNA 3'-terminal phosphate cyclase	Color2 [A=255, R=169, G=169, B=169]	1	4		14.268	14.1481	14.5632	14.751	14.7851	15.2475	15.1902	14.9678	14.7388	15.5698	15.4463	15.6555
O00443	O00443	P3C2A_HUMAN	PIK3C2A	Phosphatidylinositol 4-phosphate 3-kinase C2 domain-containing subunit alpha	Color2 [A=255, R=169, G=169, B=169]	1	4		14.9669	15.1759	14.5422	15.2386	15.5341	15.8973	16.018	15.7921	15.4271	15.9277	15.9766	16.1179
O00445	O00445	SYT5_HUMAN	SYT5	Synaptotagmin-5	Color2 [A=255, R=169, G=169, B=169]	1	4		12.3881	13.4632	14.4092	14.5063	14.377	13.8764	14.527	14.8997	14.5739	14.7462	14.7852	15.1261
O00445;P21579	O00445;P21579	SYT1_HUMAN;SYT5_HUMAN	SYT1;SYT5	Synaptotagmin-5	Color2 [A=255, R=169, G=169, B=169]	1	4		13.1207	12.9691	13.7606	13.5671	12.5672	13.3735	12.2572	12.5436	12.6394	12.9769	10.0868	13.8966
O00445;P21579;Q8N9I0	O00445;P21579;Q8N9I0	SYT1_HUMAN;SYT2_HUMAN;SYT5_HUMAN	SYT1;SYT2;SYT5	Synaptotagmin-5	Color2 [A=255, R=169, G=169, B=169]	1	4		14.3856	14.0625	14.4459	14.6424	15.3279	14.9757	15.4162	14.8508	15.535	15.2269	15.1422	15.0387
O00459	O00459;P27986;Q92569	P85B_HUMAN	PIK3R2	Phosphatidylinositol 3-kinase regulatory subunit beta	Color2 [A=255, R=169, G=169, B=169]	1	4		12.716	12.9291	12.7658	12.5774	13.2032	11.7425	12.6384	12.0278	10.0016	12.8515	13.7406	12.9738
O00461	O00461	GOLI4_HUMAN	GOLIM4	Golgi integral membrane protein 4	Color2 [A=255, R=169, G=169, B=169]	1	4		13.5989	12.5241	12.3063	13.4198	13.4978	13.3819	13.7642	13.8944	13.0905	14.0696	13.672	13.6629
O00462	O00462	MANBA_HUMAN	MANBA	Beta-mannosidase	Color2 [A=255, R=169, G=169, B=169]	1	4		15.4701	14.355	14.93	14.8474	14.9315	12.8919	15.1485	14.7717	14.3256	13.6659	13.5643	14.0001
O00468	O00468	AGRIN_HUMAN	AGRN	Agrin	Color2 [A=255, R=169, G=169, B=169]	1	4		16.1143	16.2018	16.1367	16.5428	18.235	18.2768	18.4179	18.1595	18.0309	18.8795	18.884	18.8099
O00469	O00469	PLOD2_HUMAN	PLOD2	Procollagen-lysine,2-oxoglutarate 5-dioxygenase 2	Color2 [A=255, R=169, G=169, B=169]	1	4		14.3092	14.8089	14.4982	14.3515	15.421	15.4755	16.2285	15.1998	15.2715	16.5861	16.3933	16.7744
O00470;O14770	O00470;O14770	MEIS1_HUMAN;MEIS2_HUMAN	MEIS1;MEIS2	Homeobox protein Meis1	Color2 [A=255, R=169, G=169, B=169]	1	4		11.8744	12.0157	12.845	11.806	11.87	12.047	11.4041	11.8689	12.2588	10.8095	12.0187	12.4317
O00471	O00471	EXOC5_HUMAN	EXOC5	Exocyst complex component 5	Color2 [A=255, R=169, G=169, B=169]	1	4		14.0872	14.7243	13.9107	14.434	15.0077	14.9706	14.7884	15.2332	14.5054	14.749	15.1862	15.051
O00472	O00472	ELL2_HUMAN	ELL2	RNA polymerase II elongation factor ELL2	Color2 [A=255, R=169, G=169, B=169]	1	4		12.2068	12.1577	11.1583	12.179	11.5821	9.84549	10.2067	10.5916	12.6918	12.0501	12.0431	11.4271
O00478	O00478	BT3A3_HUMAN	BTN3A3	Butyrophilin subfamily 3 member A3	Color2 [A=255, R=169, G=169, B=169]	1	4		14.1692	13.0331	13.2778	14.3881	13.8452	13.9302	14.3024	14.4001	13.2427	13.2988	13.9912	13.853
O00479	O00479	HMGN4_HUMAN	HMGN4	High mobility group nucleosome-binding domain-containing protein 4	Color2 [A=255, R=169, G=169, B=169]	1	4		16.8653	15.0684	15.952	15.4994	15.0214	14.7349	15.6572	16.9775	15.439	15.132	15.1881	15.7998
O00483	O00483	NDUA4_HUMAN	NDUFA4	Cytochrome c oxidase subunit NDUFA4	Color2 [A=255, R=169, G=169, B=169]	1	4		21.4098	21.573	21.4117	21.2512	21.2717	21.424	21.4159	21.457	21.3726	21.282	21.1133	21.0336
O00487	O00487	PSDE_HUMAN	PSMD14	26S proteasome non-ATPase regulatory subunit 14	Color2 [A=255, R=169, G=169, B=169]	1	4		16.8268	16.969	16.8442	17.1461	17.4438	17.0909	17.2402	17.3826	17.2706	17.5375	17.614	17.6741
O00488	O00488	ZN593_HUMAN	ZNF593	Zinc finger protein 593	Color2 [A=255, R=169, G=169, B=169]	1	4		14.4829	14.0705	14.8959	14.9606	13.6522	13.482	14.5153	13.7771	10.535	12.9422	13.645	14.4718
O00505	O00505	IMA4_HUMAN	KPNA3	Importin subunit alpha-4	Color2 [A=255, R=169, G=169, B=169]	1	4		17.0727	17.1773	17.469	17.5223	17.2796	17.6691	17.3681	17.0172	17.4247	17.891	17.7259	17.0725
O00505;O00629	O00505;O00629	IMA3_HUMAN;IMA4_HUMAN	KPNA3;KPNA4	Importin subunit alpha-4	Color2 [A=255, R=169, G=169, B=169]	1	4		16.5641	16.6335	17.1504	17.1815	16.6825	16.4778	16.6617	16.7784	16.5996	17.2527	17.0337	15.8853
O00507	O00507	USP9Y_HUMAN	USP9Y	Probable ubiquitin carboxyl-terminal hydrolase FAF-Y	Color2 [A=255, R=169, G=169, B=169]	1	4		13.3001	14.8667	9.97966	14.2862	11.5987	14.683	14.1943	13.6646	13.7482	14.3597	14.6681	13.9799
O00507;Q93008	O00507;Q93008	USP9X_HUMAN;USP9Y_HUMAN	USP9X;USP9Y	Probable ubiquitin carboxyl-terminal hydrolase FAF-Y	Color2 [A=255, R=169, G=169, B=169]	1	4		13.7206	14.4353	14.8861	14.6041	14.5997	14.7857	14.4881	14.5431	13.858	14.8784	14.7937	14.9725
O00519	O00519	FAAH1_HUMAN	FAAH	Fatty-acid amide hydrolase 1	Color2 [A=255, R=169, G=169, B=169]	1	4		15.98	16.1254	15.7963	15.9257	16.6627	16.5895	16.5221	16.2699	16.8261	16.6009	16.7295	16.6979
O00522	O00522	KRIT1_HUMAN	KRIT1	Krev interaction trapped protein 1	Color2 [A=255, R=169, G=169, B=169]	1	4		14.8772	14.4481	14.9782	14.8456	14.6014	15.1536	15.0039	15.1067	14.5071	14.9326	14.789	14.874
O00541	O00541	PESC_HUMAN	PES1	Pescadillo homolog	Color2 [A=255, R=169, G=169, B=169]	1	4		18.453	19.4028	19.1246	19.3925	19.2566	19.4764	19.3879	19.5464	18.6132	19.5561	19.6685	19.726
O00560	O00560	SDCB1_HUMAN	SDCBP	Syntenin-1	Color2 [A=255, R=169, G=169, B=169]	1	4		15.1028	14.4696	15.611	14.9629	15.5424	15.8508	15.5712	15.7416	16.2284	16.4542	16.5841	16.4732
O00566	O00566	MPP10_HUMAN	MPHOSPH10	U3 small nucleolar ribonucleoprotein protein MPP10	Color2 [A=255, R=169, G=169, B=169]	1	4		15.8528	16.6	16.5676	17.0112	16.0916	16.4391	16.4416	16.6301	15.9828	16.3691	16.335	16.5673
O00567	O00567	NOP56_HUMAN	NOP56	Nucleolar protein 56	Color2 [A=255, R=169, G=169, B=169]	1	4		20.2853	20.7647	20.8032	20.8427	20.6144	20.9139	20.8677	21.0117	20.5782	21.0178	21.0586	21.1778
O00571	O00571;O15523	DDX3X_HUMAN	DDX3X	ATP-dependent RNA helicase DDX3X	Color2 [A=255, R=169, G=169, B=169]	1	4		21.1355	21.0676	21.0919	21.0354	20.8924	20.6972	20.8745	20.7176	20.9996	21.1719	21.0438	20.9241
O00571;P17844;Q92841	O00571;O15523;P17844;Q92841	DDX17_HUMAN;DDX3X_HUMAN;DDX5_HUMAN	DDX17;DDX3X;DDX5	ATP-dependent RNA helicase DDX3X	Color2 [A=255, R=169, G=169, B=169]	1	4		19.6676	19.5077	19.6497	19.7363	19.2642	19.4531	19.631	19.4744	19.6542	19.8358	19.6387	19.1741
O00584	O00584	RNT2_HUMAN	RNASET2	Ribonuclease T2	Color2 [A=255, R=169, G=169, B=169]	1	4		11.7252	11.2344	10.8851	11.6026	11.1797	10.9287	11.3649	11.6007	10.4721	11.644	12.8557	12.1597
O00592	O00592	PODXL_HUMAN	PODXL	Podocalyxin	Color2 [A=255, R=169, G=169, B=169]	1	4		18.574	18.7	18.7838	18.8285	19.7921	19.9403	19.7857	19.9902	19.8255	20.2856	20.1838	20.1645
O00623	O00623	PEX12_HUMAN	PEX12	Peroxisome assembly protein 12	Color2 [A=255, R=169, G=169, B=169]	1	4		15.4489	15.6847	15.031	15.3322	15.025	15.0312	15.2873	15.2046	15.8033	14.9529	15.509	15.3894
O00628	O00628	PEX7_HUMAN	PEX7	Peroxisomal targeting signal 2 receptor	Color2 [A=255, R=169, G=169, B=169]	1	4		10.5724	13.5848	12.982	12.5202	12.7163	12.5279	12.2442	12.5798	13.0202	13.0793	13.0863	13.857
O00629	O00629	IMA3_HUMAN	KPNA4	Importin subunit alpha-3	Color2 [A=255, R=169, G=169, B=169]	1	4		14.3663	14.4411	14.1859	14.4975	15.039	14.5196	13.6424	13.6953	14.2986	14.827	13.7335	14.2573
O00634	O00634	NET3_HUMAN	NTN3	Netrin-3	Color2 [A=255, R=169, G=169, B=169]	1	4		12.3285	10.9116	11.2459	11.5784	12.1968	11.3211	12.9039	12.1702	11.687	12.5259	12.5884	12.245
O00712	O00712	NFIB_HUMAN	NFIB	Nuclear factor 1 B-type	Color2 [A=255, R=169, G=169, B=169]	1	4		18.2246	18.7501	19.0784	18.8411	18.3002	18.6848	18.5882	18.687	17.9229	18.5624	18.6404	18.376
O00712;P08651;Q12857;Q14938	O00712;P08651;Q12857;Q14938	NFIA_HUMAN;NFIB_HUMAN;NFIC_HUMAN;NFIX_HUMAN	NFIA;NFIB;NFIC;NFIX	Nuclear factor 1 B-type	Color2 [A=255, R=169, G=169, B=169]	1	4		20.8168	21.9707	22.0911	21.5646	20.8653	21.6753	21.1986	21.2929	20.6877	20.9496	21.4997	20.9778
O00712;Q12857	O00712;Q12857	NFIA_HUMAN;NFIB_HUMAN	NFIA;NFIB	Nuclear factor 1 B-type	Color2 [A=255, R=169, G=169, B=169]	1	4		16.2252	16.2073	16.4906	16.6905	16.4271	16.1166	16.5408	15.3509	15.6238	15.7878	15.8949	16.2373
O00716	O00716	E2F3_HUMAN	E2F3	Transcription factor E2F3	Color2 [A=255, R=169, G=169, B=169]	1	4		13.8761	14.4984	14.882	14.8016	14.5049	15.2979	14.7206	14.4136	14.1187	15.3619	15.5435	15.5003
O00716;Q14209	O00716;Q14209	E2F2_HUMAN;E2F3_HUMAN	E2F2;E2F3	Transcription factor E2F3	Color2 [A=255, R=169, G=169, B=169]	1	4		15.1026	15.5904	15.6989	15.6303	14.6071	15.7255	15.6363	15.6332	14.7842	15.7327	16.09	16.0927
O00743	O00743	PPP6_HUMAN	PPP6C	Serine/threonine-protein phosphatase 6 catalytic subunit	Color2 [A=255, R=169, G=169, B=169]	1	4		15.1395	15.5821	14.999	15.861	15.1089	16.0064	15.6582	16.039	14.9333	16.1172	16.0192	16.4352
O00746	O00746	NDKM_HUMAN	NME4	Nucleoside diphosphate kinase, mitochondrial	Color2 [A=255, R=169, G=169, B=169]	1	4		18.1147	18.0958	17.7878	18.1445	17.621	17.5224	17.608	17.8134	17.6614	17.6836	17.2435	17.2528
O00750	O00750	P3C2B_HUMAN	PIK3C2B	Phosphatidylinositol 4-phosphate 3-kinase C2 domain-containing subunit beta	Color2 [A=255, R=169, G=169, B=169]	1	4		13.0938	14.1721	14.0743	13.8932	14.2814	14.1679	14.938	14.7912	14.9854	15.4445	15.0144	15.0012
O00762	O00762	UBE2C_HUMAN	UBE2C	Ubiquitin-conjugating enzyme E2 C	Color2 [A=255, R=169, G=169, B=169]	1	4		11.3067	13.3539	13.2717	12.8524	14.292	13.9142	14.2443	14.6138	12.6198	14.2082	14.7517	14.5954
O00763	O00763	ACACB_HUMAN	ACACB	Acetyl-CoA carboxylase 2	Color2 [A=255, R=169, G=169, B=169]	1	4		15.5554	15.5689	15.6205	15.6036	15.9038	16.0543	15.7932	15.5895	16.0006	15.6386	15.595	15.487
O00763;Q13085	O00763;Q13085	ACACA_HUMAN;ACACB_HUMAN	ACACA;ACACB	Acetyl-CoA carboxylase 2	Color2 [A=255, R=169, G=169, B=169]	1	4		20.0766	20.103	20.0835	19.8966	19.924	19.8476	19.676	19.6861	20.1424	19.5493	19.4858	19.3958
O00764	O00764	PDXK_HUMAN	PDXK	Pyridoxal kinase	Color2 [A=255, R=169, G=169, B=169]	1	4		10.9979	12.1383	10.2024	11.1658	13.8764	13.1161	12.9217	14.2795	13.3646	13.4472	14.4628	14.8511
O00767	O00767	SCD_HUMAN	SCD	Stearoyl-CoA desaturase	Color2 [A=255, R=169, G=169, B=169]	1	4		18.5498	18.7047	18.5432	18.1828	18.4993	18.1203	18.4867	18.8516	18.595	17.9998	18.2879	17.8024
O14490	O14490	DLGP1_HUMAN	DLGAP1	Disks large-associated protein 1	Color2 [A=255, R=169, G=169, B=169]	1	4		11.1548	8.57308	12.4148	11.4309	12.8288	13.0995	14.013	12.6346	11.2278	11.7979	12.5753	13.4239
O14492	O14492	SH2B2_HUMAN	SH2B2	SH2B adapter protein 2	Color2 [A=255, R=169, G=169, B=169]	1	4		10.5238	9.9346	11.2751	12.1039	12.2719	11.368	11.4312	11.689	10.7066	12.1874	11.7575	11.7406
O14495	O14495	PLPP3_HUMAN	PLPP3	Phospholipid phosphatase 3	Color2 [A=255, R=169, G=169, B=169]	1	4		13.5723	13.2367	13.2158	13.7472	14.1861	13.3761	13.6679	13.9036	13.0177	14.2651	13.0842	14.2741
O14497	O14497	ARI1A_HUMAN	ARID1A	AT-rich interactive domain-containing protein 1A	Color2 [A=255, R=169, G=169, B=169]	1	4		16.939	17.1449	17.3329	17.179	17.5968	18.1332	17.6655	17.6193	17.9789	18.3927	18.231	18.1712
O14497;Q8NFD5	O14497;Q8NFD5	ARI1A_HUMAN;ARI1B_HUMAN	ARID1A;ARID1B	AT-rich interactive domain-containing protein 1A	Color2 [A=255, R=169, G=169, B=169]	1	4		15.0727	15.6148	16.246	14.8167	15.8602	16.2884	15.1121	15.6164	16.2383	16.248	16.6561	16.4054
O14519	O14519	CDKA1_HUMAN	CDK2AP1	Cyclin-dependent kinase 2-associated protein 1	Color2 [A=255, R=169, G=169, B=169]	1	4		15.1811	15.0557	15.535	14.8624	15.1997	15.8401	15.2823	15.5491	15.2281	15.823	16.0443	15.7676
O14521	O14521	DHSD_HUMAN	SDHD	Succinate dehydrogenase [ubiquinone] cytochrome b small subunit, mitochondrial	Color2 [A=255, R=169, G=169, B=169]	1	4		16.7268	17.1309	16.9229	17.1497	17.1682	16.4888	17.2434	17.3112	17.3912	17.0105	16.9953	16.432
O14523	O14523	C2C2L_HUMAN	C2CD2L	Phospholipid transfer protein C2CD2L	Color2 [A=255, R=169, G=169, B=169]	1	4		16.7731	16.7365	16.7999	16.6717	17.0482	17.0645	16.9475	17.0291	17.0513	17.2759	17.2275	17.1377
O14524	O14524	NEMP1_HUMAN	NEMP1	Nuclear envelope integral membrane protein 1	Color2 [A=255, R=169, G=169, B=169]	1	4		17.0673	17.4334	17.516	17.4657	17.4298	17.7687	17.8318	17.7674	17.0186	17.3855	17.2212	16.8456
O14529	O14529	CUX2_HUMAN	CUX2	Homeobox protein cut-like 2	Color2 [A=255, R=169, G=169, B=169]	1	4		15.7248	14.7777	14.7418	13.9936	12.4024	14.1555	14.4942	14.2215	13.2061	14.6773	14.3689	15.5166
O14529;P39880	O14529;P39880	CUX1_HUMAN;CUX2_HUMAN	CUX1;CUX2	Homeobox protein cut-like 2	Color2 [A=255, R=169, G=169, B=169]	1	4		11.7141	13.6976	12.4091	13.8463	14.1684	13.9593	13.6017	14.2687	13.5731	14.7624	14.8376	14.8023
O14531	O14531	DPYL4_HUMAN	DPYSL4	Dihydropyrimidinase-related protein 4	Color2 [A=255, R=169, G=169, B=169]	1	4		17.3881	16.705	17.3216	15.7526	17.4466	17.7331	17.2846	17.555	18.2681	18.461	18.0704	18.6022
O14545	O14545	TRAD1_HUMAN	TRAFD1	TRAF-type zinc finger domain-containing protein 1	Color2 [A=255, R=169, G=169, B=169]	1	4		13.438	13.0031	13.5408	13.9563	13.9736	13.6206	13.3611	13.3584	13.0728	14.6016	13.3505	14.0279
O14548	O14548	COX7R_HUMAN	COX7A2L	Cytochrome c oxidase subunit 7A-related protein, mitochondrial	Color2 [A=255, R=169, G=169, B=169]	1	4		17.3409	17.3391	17.3365	17.6522	17.6471	17.4863	17.9935	17.8718	17.6052	17.2809	17.5278	17.357
O14556	O14556	G3PT_HUMAN	GAPDHS	Glyceraldehyde-3-phosphate dehydrogenase, testis-specific	Color2 [A=255, R=169, G=169, B=169]	1	4		15.4329	14.7636	15.5193	15.2092	15.518	15.7986	14.8269	15.162	16.0696	15.6047	16.0331	15.9719
O14556;P04406	O14556;P04406	G3PT_HUMAN;G3P_HUMAN	GAPDH;GAPDHS	Glyceraldehyde-3-phosphate dehydrogenase, testis-specific	Color2 [A=255, R=169, G=169, B=169]	1	4		17.5056	17.6806	18.9541	19.6837	19.4819	18.3848	18.4054	19.054	18.0288	18.6844	19.2	18.5068
O14559	O14559	RHG33_HUMAN	ARHGAP33	Rho GTPase-activating protein 33	Color2 [A=255, R=169, G=169, B=169]	1	4		11.2071	12.3846	12.9962	10.83	13.6211	13.6503	13.136	12.2602	13.8811	14.4122	13.5599	13.5029
O14561	O14561	ACPM_HUMAN	NDUFAB1	Acyl carrier protein, mitochondrial	Color2 [A=255, R=169, G=169, B=169]	1	4		16.0251	16.1749	15.6115	16.3354	16.2038	16.4997	16.4069	17.1786	17.0216	16.3112	16.0502	15.7583
O14578	O14578	CTRO_HUMAN	CIT	Citron Rho-interacting kinase	Color2 [A=255, R=169, G=169, B=169]	1	4		15.1666	15.8414	15.3541	15.9558	15.2718	15.6972	15.7353	15.2957	15.275	16.6344	16.4145	16.4337
O14579	O14579	COPE_HUMAN	COPE	Coatomer subunit epsilon	Color2 [A=255, R=169, G=169, B=169]	1	4		16.2964	16.1285	16.6022	16.017	16.194	15.9946	15.9651	15.6132	16.1299	15.4055	15.6474	15.7049
O14593	O14593	RFXK_HUMAN	RFXANK	DNA-binding protein RFXANK	Color2 [A=255, R=169, G=169, B=169]	1	4		10.6875	11.968	11.3077	11.9392	9.88355	12.0457	11.8918	10.9855	10.4696	10.9901	12.0171	11.9361
O14594	O14594	NCAN_HUMAN	NCAN	Neurocan core protein	Color2 [A=255, R=169, G=169, B=169]	1	4		10.9998	10.6649	11.8321	12.1843	13.2867	13.5356	13.1049	11.3811	12.026	14.4264	14.1925	14.0561
O14599	O14599	VCY2_HUMAN	BPY2C	Testis-specific basic protein Y 2	Color2 [A=255, R=169, G=169, B=169]	1	4		21.8786	21.5291	21.4244	20.2006	21.5716	20.7677	21.7222	22.1895	21.1729	19.9111	19.9324	19.8848
O14617	O14617	AP3D1_HUMAN	AP3D1	AP-3 complex subunit delta-1	Color2 [A=255, R=169, G=169, B=169]	1	4		15.2146	14.9965	15.2631	15.339	15.1254	15.4406	15.3994	15.3727	14.9357	15.1793	15.1929	15.5753
O14618	O14618	CCS_HUMAN	CCS	Copper chaperone for superoxide dismutase	Color2 [A=255, R=169, G=169, B=169]	1	4		11.2268	12.8735	10.4824	12.8237	12.8489	9.78185	11.091	12.3357	12.652	13.3221	13.6393	14.0488
O14628	O14628	ZN195_HUMAN	ZNF195	Zinc finger protein 195	Color2 [A=255, R=169, G=169, B=169]	1	4		13.6333	15.0722	15.4995	15.1197	14.6319	16.1629	15.8793	15.6852	14.2457	16.1441	16.1438	16.0032
O14628;O60765;O75346;P0DPD5;P59923;Q03936;Q08AN1;Q15928;Q5HY98;Q5JVG8;Q5VIY5;Q6ZN08;Q7L2R6;Q8IW36;Q8N782;Q8NB42;Q8WV37;Q96H40;Q96IR2;Q96JL9;Q96LW1;Q96SE7;Q9HBT8;Q9P2J8	O14628;P59923;Q15928;Q7L2R6;Q8WV37;Q96JL9;Q9HBT8;A2RRD8;O60765;O75346;P17035;P17039;Q03936;Q5FWF6;Q86YE8;Q8IW36;Q8IYX0;Q8N859;Q8N9Z0;Q96JC4;Q96SE7;Q9NV72;Q9P2J8;Q9Y2Q1;A6NN14;A6NP11;A8MT65;P0CB33;Q03938;Q08AN1;Q3MIS6;Q3SXZ3;Q5HY98;Q5JVG8;Q5VIY5;Q6ZN06;Q6ZN08;Q76KX8;Q86XN6;Q86XU0;Q8IYB9;Q8N782;Q8NB42;Q8TB69;Q96H40;Q96LW1;Q9H7R5;A0A1W2PQL4;B4DXR9;P0CJ79;P0DPD5;Q96IR2	Z286A_HUMAN;Z354A_HUMAN;Z354B_HUMAN;ZN141_HUMAN;ZN195_HUMAN;ZN253_HUMAN;ZN333_HUMAN;ZN347_HUMAN;ZN445_HUMAN;ZN468_HUMAN;ZN480_HUMAN;ZN486_HUMAN;ZN506_HUMAN;ZN525_HUMAN;ZN527_HUMAN;ZN616_HUMAN;ZN624_HUMAN;ZN695_HUMAN;ZN723_HUMAN;ZN765_HUMAN;ZN766_HUMAN;ZN845_HUMAN;ZNF66_HUMAN;ZNF92_HUMAN	ZNF141;ZNF195;ZNF253;ZNF286A;ZNF333;ZNF347;ZNF354A;ZNF354B;ZNF445;ZNF468;ZNF480;ZNF486;ZNF506;ZNF525;ZNF527;ZNF616;ZNF624;ZNF66;ZNF695;ZNF723;ZNF765;ZNF766;ZNF845;ZNF92	Zinc finger protein 195	Color2 [A=255, R=169, G=169, B=169]	1	4		12.3281	14.6786	15.2203	15.4687	11.5354	16.4056	15.8356	15.2718	14.0977	16.0528	15.6355	14.2852
O14633;Q5TA81	O14633;Q5TA81	LCE2B_HUMAN;LCE2C_HUMAN	LCE2B;LCE2C	Late cornified envelope protein 2B	Color2 [A=255, R=169, G=169, B=169]	1	4		15.0908	15.2796	15.3138	18.1185	15.8653	14.7481	14.1446	14.0082	15.4077	14.2545	15.5951	15.246
O14639	O14639	ABLM1_HUMAN	ABLIM1	Actin-binding LIM protein 1	Color2 [A=255, R=169, G=169, B=169]	1	4		13.0329	11.2084	11.1664	12.526	13.6586	13.6145	13.069	12.1591	13.9008	14.3177	14.4255	14.4701
O14640	O14640	DVL1_HUMAN	DVL1	Segment polarity protein dishevelled homolog DVL-1	Color2 [A=255, R=169, G=169, B=169]	1	4		13.8827	12.6007	13.2839	13.3043	12.0707	13.7993	13.6825	13.4307	14.028	14.7279	14.6037	14.2549
O14640;O14641	O14640;O14641;Q92997;P54792	DVL1_HUMAN;DVL2_HUMAN	DVL1;DVL2	Segment polarity protein dishevelled homolog DVL-1	Color2 [A=255, R=169, G=169, B=169]	1	4		12.9233	12.1888	10.4911	12.5851	10.5191	12.3192	12.8205	12.2456	11.9433	12.5062	13.6635	12.4411
O14641	O14641	DVL2_HUMAN	DVL2	Segment polarity protein dishevelled homolog DVL-2	Color2 [A=255, R=169, G=169, B=169]	1	4		10.8994	13.0521	12.647	12.8363	12.6577	12.7035	13.1979	12.8169	12.6548	13.2704	13.4952	14.2235
O14646	O14646	CHD1_HUMAN	CHD1	Chromodomain-helicase-DNA-binding protein 1	Color2 [A=255, R=169, G=169, B=169]	1	4		15.2786	15.4631	15.8124	15.6105	15.3971	15.6779	15.6992	16.0432	15.2834	15.9689	16.3381	16.2471
O14646;O14647	O14646;O14647	CHD1_HUMAN;CHD2_HUMAN	CHD1;CHD2	Chromodomain-helicase-DNA-binding protein 1	Color2 [A=255, R=169, G=169, B=169]	1	4		14.8501	15.656	15.6672	15.953	15.075	16.0776	15.8736	15.8723	14.9277	16.3681	16.3646	16.0331
O14646;O14647;Q3L8U1;Q8TD26;Q9HCK8;Q9P2D1	O14646;O14647;Q3L8U1;Q8TD26;Q9HCK8;Q9P2D1	CHD1_HUMAN;CHD2_HUMAN;CHD6_HUMAN;CHD7_HUMAN;CHD8_HUMAN;CHD9_HUMAN	CHD1;CHD2;CHD6;CHD7;CHD8;CHD9	Chromodomain-helicase-DNA-binding protein 1	Color2 [A=255, R=169, G=169, B=169]	1	4		16.0936	15.9219	17.0661	16.142	15.2148	17.2037	17.0199	15.7825	16.1015	16.8458	17.1498	17.2335
O14647	O14647	CHD2_HUMAN	CHD2	Chromodomain-helicase-DNA-binding protein 2	Color2 [A=255, R=169, G=169, B=169]	1	4		16.2234	16.8003	16.7954	16.8099	16.6792	16.9646	16.9327	16.8251	16.1907	17.1181	17.1526	17.0237
O14653	O14653	GOSR2_HUMAN	GOSR2	Golgi SNAP receptor complex member 2	Color2 [A=255, R=169, G=169, B=169]	1	4		18.8297	19.0988	19.6317	19.5381	19.6028	20.0589	19.4822	19.5813	20.2548	20.2917	20.1566	19.9931
O14654	O14654	IRS4_HUMAN	IRS4	Insulin receptor substrate 4	Color2 [A=255, R=169, G=169, B=169]	1	4		12.1858	12.1986	10.7461	11.7654	11.2111	12.0383	11.4199	9.73986	11.5196	9.78665	10.1339	12.1416
O14656	O14656	TOR1A_HUMAN	TOR1A	Torsin-1A	Color2 [A=255, R=169, G=169, B=169]	1	4		17.1605	17.2796	17.3428	17.3042	17.1132	17.1497	17.1989	17.2167	17.4963	17.1951	17.2431	17.1093
O14657	O14657	TOR1B_HUMAN	TOR1B	Torsin-1B	Color2 [A=255, R=169, G=169, B=169]	1	4		13.4429	14.9664	13.6677	14.9373	14.8028	14.9032	15.2716	15.3687	15.1973	15.8375	15.3594	15.3683
O14662	O14662	STX16_HUMAN	STX16	Syntaxin-16	Color2 [A=255, R=169, G=169, B=169]	1	4		14.895	14.2722	13.9764	14.3063	15.0149	14.9879	14.8609	14.6728	15.0657	15.2594	15.2549	15.1554
O14672	O14672	ADA10_HUMAN	ADAM10	Disintegrin and metalloproteinase domain-containing protein 10	Color2 [A=255, R=169, G=169, B=169]	1	4		15.8131	15.8443	15.9279	16.2474	15.9173	16.0629	16.2382	15.9582	15.7057	16.2793	16.5319	16.3978
O14678	O14678	ABCD4_HUMAN	ABCD4	Lysosomal cobalamin transporter ABCD4	Color2 [A=255, R=169, G=169, B=169]	1	4		16.471	16.7398	16.6144	16.4483	16.7793	17.1427	17.0696	17.2383	16.5166	16.6197	16.6958	16.1582
O14681	O14681	EI24_HUMAN	EI24	Etoposide-induced protein 2.4 homolog	Color2 [A=255, R=169, G=169, B=169]	1	4		19.39	19.8637	19.7166	19.5966	19.7936	19.9703	20.0061	20.1444	19.7614	19.8728	19.8154	19.4008
O14683	O14683	P5I11_HUMAN	TP53I11	Tumor protein p53-inducible protein 11	Color2 [A=255, R=169, G=169, B=169]	1	4		17.8172	17.9881	17.9818	18.0427	18.9087	18.7226	18.9003	18.8859	19.3709	18.8741	18.9442	18.8417
O14686	O14686	KMT2D_HUMAN	KMT2D	Histone-lysine N-methyltransferase 2D	Color2 [A=255, R=169, G=169, B=169]	1	4		14.6532	14.5696	14.8628	14.7936	15.1998	15.3743	14.9999	15.2595	15.2463	15.4497	15.7158	15.721
O14686;Q8NEZ4	O14686;Q8NEZ4	KMT2C_HUMAN;KMT2D_HUMAN	KMT2C;KMT2D	Histone-lysine N-methyltransferase 2D	Color2 [A=255, R=169, G=169, B=169]	1	4		11.8158	11.2273	13.7277	12.1627	13.1199	11.9652	13.2448	11.7093	11.021	12.4079	10.8816	11.9039
O14709	O14709	ZN197_HUMAN	ZNF197	Zinc finger protein 197	Color2 [A=255, R=169, G=169, B=169]	1	4		11.3185	13.1371	14.0206	13.7132	13.6616	13.8105	13.1659	13.2978	12.8886	13.7703	13.1745	13.41
O14713	O14713	ITBP1_HUMAN	ITGB1BP1	Integrin beta-1-binding protein 1	Color2 [A=255, R=169, G=169, B=169]	1	4		11.1031	12.7769	11.1205	11.607	11.1224	9.25093	12.1032	11.0038	10.721	12.6832	10.8499	10.9062
O14727	O14727	APAF_HUMAN	APAF1	Apoptotic protease-activating factor 1	Color2 [A=255, R=169, G=169, B=169]	1	4		10.9924	12.5503	12.8216	12.0187	13.5027	13.6824	14.1279	14.7777	14.2485	14.6611	14.6257	15.0506
O14730	O14730	RIOK3_HUMAN	RIOK3	Serine/threonine-protein kinase RIO3	Color2 [A=255, R=169, G=169, B=169]	1	4		10.0223	10.389	11.4834	11.677	9.52166	8.85789	10.8059	12.2694	11.7131	12.4597	13.0968	12.7623
O14732	O14732	IMPA2_HUMAN	IMPA2	Inositol monophosphatase 2	Color2 [A=255, R=169, G=169, B=169]	1	4		14.2796	15.1723	14.8978	16.4603	14.9792	13.6178	14.6963	14.5685	14.6651	13.4927	14.8863	14.5705
O14733	O14733	MP2K7_HUMAN	MAP2K7	Dual specificity mitogen-activated protein kinase kinase 7	Color2 [A=255, R=169, G=169, B=169]	1	4		13.6331	13.7661	14.2235	13.9739	14.2952	14.509	14.4854	14.6011	14.2103	14.6951	14.655	15.4063
O14734	O14734	ACOT8_HUMAN	ACOT8	Acyl-coenzyme A thioesterase 8	Color2 [A=255, R=169, G=169, B=169]	1	4		18.2692	18.6141	18.4167	18.3285	19.1544	19.0744	19.0219	18.9796	18.8449	19.2649	19.2614	19.2563
O14735	O14735	CDIPT_HUMAN	CDIPT	CDP-diacylglycerol--inositol 3-phosphatidyltransferase	Color2 [A=255, R=169, G=169, B=169]	1	4		17.965	18.1966	18.1772	18.0427	17.9134	18.2382	18.4331	18.3314	17.9697	17.8986	17.5065	17.2706
O14744	O14744	ANM5_HUMAN	PRMT5	Protein arginine N-methyltransferase 5	Color2 [A=255, R=169, G=169, B=169]	1	4		15.0872	15.6858	15.7948	15.7263	15.8099	15.6769	15.832	15.8899	15.8202	16.351	16.4495	16.4891
O14745	O14745	NHRF1_HUMAN	SLC9A3R1	Na(+)/H(+) exchange regulatory cofactor NHE-RF1	Color2 [A=255, R=169, G=169, B=169]	1	4		11.2689	12.2507	13.9042	13.4004	13.5549	14.0013	12.937	13.1093	13.1533	14.2535	14.1175	13.9972
O14757	O14757	CHK1_HUMAN	CHEK1	Serine/threonine-protein kinase Chk1	Color2 [A=255, R=169, G=169, B=169]	1	4		15.2267	15.7711	15.2445	15.5975	15.8177	16.0239	15.8366	15.7477	15.3269	16.2667	16.1417	16.2608
O14764	O14764	GBRD_HUMAN	GABRD	Gamma-aminobutyric acid receptor subunit delta	Color2 [A=255, R=169, G=169, B=169]	1	4		9.76981	10.4474	10.4381	10.9932	13.5411	13.5537	12.8699	12.2185	13.0674	10.5465	13.1204	11.843
O14773	O14773	TPP1_HUMAN	TPP1	Tripeptidyl-peptidase 1	Color2 [A=255, R=169, G=169, B=169]	1	4		17.4382	17.9471	17.7191	18.3308	18.1933	17.2331	18.2256	18.3485	17.6558	17.8746	18.2087	18.0625
O14776	O14776	TCRG1_HUMAN	TCERG1	Transcription elongation regulator 1	Color2 [A=255, R=169, G=169, B=169]	1	4		17.0846	17.0892	17.1673	17.2327	17.3818	17.635	17.2474	16.9031	17.2072	17.5253	17.6553	17.6138
O14777	O14777	NDC80_HUMAN	NDC80	Kinetochore protein NDC80 homolog	Color2 [A=255, R=169, G=169, B=169]	1	4		14.3277	13.715	13.5051	13.9372	13.8383	14.5621	13.9533	14.3384	13.9146	14.292	14.4244	14.5607
O14782	O14782	KIF3C_HUMAN	KIF3C	Kinesin-like protein KIF3C	Color2 [A=255, R=169, G=169, B=169]	1	4		13.7461	10.4425	10.5227	10.3118	11.8462	9.98196	13.8003	10.6272	12.0074	13.3478	13.5096	14.5354
O14782;O15066	O14782;O15066	KIF3B_HUMAN;KIF3C_HUMAN	KIF3B;KIF3C	Kinesin-like protein KIF3C	Color2 [A=255, R=169, G=169, B=169]	1	4		11.8409	11.372	11.6646	11.0321	9.34843	13.0291	13.3896	11.381	10.9122	13.343	13.2819	13.6593
O14782;Q9BVG8	O14782;O15066;Q9BVG8;Q9P2E2	KIF3C_HUMAN;KIFC3_HUMAN	KIF3C;KIFC3	Kinesin-like protein KIF3C	Color2 [A=255, R=169, G=169, B=169]	1	4		13.4021	10.5844	9.58685	13.2878	15.1674	13.9894	15.6225	9.98509	15.6393	10.2463	11.5709	12.0987
O14787	O14787	TNPO2_HUMAN	TNPO2	Transportin-2	Color2 [A=255, R=169, G=169, B=169]	1	4		10.8997	13.7493	13.3943	12.2549	13.6566	13.7331	13.2575	13.1546	13.0883	14.3965	14.6911	14.7555
O14787;Q92973	O14787;Q92973	TNPO1_HUMAN;TNPO2_HUMAN	TNPO1;TNPO2	Transportin-2	Color2 [A=255, R=169, G=169, B=169]	1	4		16.4198	17.5566	16.1643	17.506	17.135	17.0613	17.3753	17.4551	15.8235	17.1934	17.3829	17.8279
O14795	O14795	UN13B_HUMAN	UNC13B	Protein unc-13 homolog B	Color2 [A=255, R=169, G=169, B=169]	1	4		10.2955	9.94455	10.9402	12.7173	12.7665	12.6337	11.3622	13.4701	12.311	12.1328	11.8544	11.1632
O14795;Q8NB66;Q9UPW8	O14795;Q8NB66;Q9UPW8	UN13A_HUMAN;UN13B_HUMAN;UN13C_HUMAN	UNC13A;UNC13B;UNC13C	Protein unc-13 homolog B	Color2 [A=255, R=169, G=169, B=169]	1	4		13.4441	13.9681	14.5221	12.6513	14.3729	14.2441	15.133	14.1598	14.0228	15.022	14.7784	14.3347
O14802	O14802	RPC1_HUMAN	POLR3A	DNA-directed RNA polymerase III subunit RPC1	Color2 [A=255, R=169, G=169, B=169]	1	4		14.6511	14.629	14.9491	14.9775	14.9927	14.9491	15.0797	14.8939	14.5773	14.8921	15.3425	15.3164
O14802;O95602	O14802;O95602	RPA1_HUMAN;RPC1_HUMAN	POLR1A;POLR3A	DNA-directed RNA polymerase III subunit RPC1	Color2 [A=255, R=169, G=169, B=169]	1	4		15.3573	17.0296	14.0752	16.4338	17.0507	16.5015	14.1377	17.2612	15.6874	16.908	17.264	16.8999
O14818	O14818	PSA7_HUMAN	PSMA7	Proteasome subunit alpha type-7	Color2 [A=255, R=169, G=169, B=169]	1	4		16.5103	17.0793	16.6167	17.7213	16.8809	16.2389	16.4807	16.6178	16.7419	16.6554	17.0018	17.1536
O14828	O14828	SCAM3_HUMAN	SCAMP3	Secretory carrier-associated membrane protein 3	Color2 [A=255, R=169, G=169, B=169]	1	4		20.1121	20.346	20.1417	19.8967	19.8136	19.8485	19.7544	19.803	20.0121	19.5375	19.6179	19.499
O14832	O14832	PAHX_HUMAN	PHYH	Phytanoyl-CoA dioxygenase, peroxisomal	Color2 [A=255, R=169, G=169, B=169]	1	4		14.5397	14.6066	14.8704	15.2008	16.7063	17.0236	17.041	16.4957	15.665	17.4595	17.7179	17.7573
O14863	O14863	ZNT4_HUMAN	SLC30A4	Zinc transporter 4	Color2 [A=255, R=169, G=169, B=169]	1	4		13.5542	13.1842	13.5267	10.8272	12.9506	14.4754	12.873	12.8075	12.9835	11.4039	10.577	12.3711
O14867	O14867	BACH1_HUMAN	BACH1	Transcription regulator protein BACH1	Color2 [A=255, R=169, G=169, B=169]	1	4		9.9015	11.4534	10.1848	9.23772	11.8285	14.2775	13.926	13.1248	9.93737	13.8809	13.5199	13.6211
O14874	O14874	BCKD_HUMAN	BCKDK	[3-methyl-2-oxobutanoate dehydrogenase [lipoamide]] kinase, mitochondrial	Color2 [A=255, R=169, G=169, B=169]	1	4		19.1724	19.0559	19.1507	19.2675	19.1677	19.1547	19.2861	19.3522	18.947	18.7676	18.6883	18.518
O14880	O14880	MGST3_HUMAN	MGST3	Microsomal glutathione S-transferase 3	Color2 [A=255, R=169, G=169, B=169]	1	4		20.1872	20.3578	20.198	19.9524	20.4837	20.3165	20.6418	20.524	20.2928	20.1582	19.8722	19.4504
O14908	O14908	GIPC1_HUMAN	GIPC1	PDZ domain-containing protein GIPC1	Color2 [A=255, R=169, G=169, B=169]	1	4		14.4169	14.5739	14.7698	14.7241	14.7057	14.6243	15.0553	14.8922	14.1017	15.1283	15.1716	15.3261
O14910	O14910	LIN7A_HUMAN	LIN7A	Protein lin-7 homolog A	Color2 [A=255, R=169, G=169, B=169]	1	4		12.973	13.4763	12.9364	11.4846	14.0982	14.5093	14.4737	14.3717	14.5489	14.6854	15.6342	15.6913
O14910;Q9NUP9	O14910;Q9NUP9	LIN7A_HUMAN;LIN7C_HUMAN	LIN7A;LIN7C	Protein lin-7 homolog A	Color2 [A=255, R=169, G=169, B=169]	1	4		15.6386	16.5811	16.0788	16.3739	16.6226	17.2375	16.9419	17.2404	17.1783	17.3831	17.4569	17.2779
O14920	O14920	IKKB_HUMAN	IKBKB	Inhibitor of nuclear factor kappa-B kinase subunit beta	Color2 [A=255, R=169, G=169, B=169]	1	4		13.3841	13.8922	13.2779	13.1144	12.4139	13.583	13.2283	13.4168	12.1902	12.9697	13.4199	14.0852
O14924	O14924	RGS12_HUMAN	RGS12	Regulator of G-protein signaling 12	Color2 [A=255, R=169, G=169, B=169]	1	4		13.3903	13.8117	13.9823	13.8354	14.4272	13.9169	14.7551	14.3868	13.5116	14.3856	14.6193	14.3527
O14925	O14925;Q5SRD1	TIM23_HUMAN	TIMM23	Mitochondrial import inner membrane translocase subunit Tim23	Color2 [A=255, R=169, G=169, B=169]	1	4		19.7504	19.5562	19.7384	19.6682	19.554	19.6116	19.5805	19.3837	19.7845	19.3494	19.4277	19.2846
O14929	O14929	HAT1_HUMAN	HAT1	Histone acetyltransferase type B catalytic subunit	Color2 [A=255, R=169, G=169, B=169]	1	4		13.8527	14.4136	15.2077	14.9312	15.0655	14.0981	13.9389	14.6674	14.5235	14.1358	15.1657	15.3481
O14936	O14936	CSKP_HUMAN	CASK	Peripheral plasma membrane protein CASK	Color2 [A=255, R=169, G=169, B=169]	1	4		19.4074	19.7336	19.6475	19.8863	20.3385	20.4528	20.3314	20.4189	19.7066	20.3981	20.3333	20.2276
O14939	O14939	PLD2_HUMAN	PLD2	Phospholipase D2	Color2 [A=255, R=169, G=169, B=169]	1	4		15.159	15.7585	15.6613	15.7242	15.7158	15.9011	16.0324	15.9147	15.5295	15.8869	16.0058	15.6908
O14949	O14949	QCR8_HUMAN	UQCRQ	Cytochrome b-c1 complex subunit 8	Color2 [A=255, R=169, G=169, B=169]	1	4		21.2352	21.2544	21.3056	21.0833	21.0795	21.0064	21.2738	21.196	21.1861	20.9091	20.7737	20.7189
O14950;P19105	O14950;P19105;P24844	ML12A_HUMAN;ML12B_HUMAN	MYL12A;MYL12B	Myosin regulatory light chain 12B	Color2 [A=255, R=169, G=169, B=169]	1	4		16.4569	16.4808	17.1854	16.4834	17.5403	18.1476	17.4459	17.7853	17.7302	18.4198	18.6373	18.4382
O14957	O14957	QCR10_HUMAN	UQCR11	Cytochrome b-c1 complex subunit 10	Color2 [A=255, R=169, G=169, B=169]	1	4		18.1058	18.505	18.0956	18.2143	18.3588	18.4155	18.5389	18.5954	18.251	18.1455	18.1452	17.9083
O14965	O14965	AURKA_HUMAN	AURKA	Aurora kinase A	Color2 [A=255, R=169, G=169, B=169]	1	4		17.2636	17.4092	17.2846	17.2163	17.6218	17.6642	17.4325	17.3122	17.3325	18.0294	18.1037	18.2033
O14965;Q96GD4	O14965;Q96GD4;Q9UQB9	AURKA_HUMAN;AURKB_HUMAN	AURKA;AURKB	Aurora kinase A	Color2 [A=255, R=169, G=169, B=169]	1	4		16.3204	17.0397	17.245	17.821	17.0464	17.9429	16.9765	17.5239	16.8315	17.599	17.4711	17.4477
O14966	O14966	RAB7L_HUMAN	RAB29	Ras-related protein Rab-7L1	Color2 [A=255, R=169, G=169, B=169]	1	4		17.7722	17.8468	17.596	17.6982	18.779	18.654	18.9064	18.7382	18.2603	18.1837	18.0004	17.9984
O14966;Q13637	O14966;P57729;Q13637	RAB32_HUMAN;RAB7L_HUMAN	RAB29;RAB32	Ras-related protein Rab-7L1	Color2 [A=255, R=169, G=169, B=169]	1	4		15.5863	15.1986	11.3043	15.3807	16.156	16.1298	16.3622	16.7742	15.8026	15.9199	15.781	11.7389
O14967	O14967	CLGN_HUMAN	CLGN	Calmegin	Color2 [A=255, R=169, G=169, B=169]	1	4		15.9128	16.4712	15.9736	15.6741	16.5559	16.462	16.3689	16.4561	16.4056	16.7368	16.5862	16.4999
O14967;P27824	O14967;P27824	CALX_HUMAN;CLGN_HUMAN	CANX;CLGN	Calmegin	Color2 [A=255, R=169, G=169, B=169]	1	4		16.2639	16.8275	16.6507	16.156	16.3091	16.0324	16.6905	16.6031	15.5074	16.0147	16.4617	15.9498
O14972	O14972	VP26C_HUMAN	VPS26C	Vacuolar protein sorting-associated protein 26C	Color2 [A=255, R=169, G=169, B=169]	1	4		13.2112	11.2147	13.407	12.2323	13.6712	14.0759	13.381	13.2787	13.679	11.8367	13.1973	14.0238
O14974	O14974	MYPT1_HUMAN	PPP1R12A	Protein phosphatase 1 regulatory subunit 12A	Color2 [A=255, R=169, G=169, B=169]	1	4		10.7297	13.1168	12.3194	11.6418	13.0384	13.6523	13.1657	13.698	13.7416	14.6561	14.3093	14.4787
O14975	O14975	S27A2_HUMAN	SLC27A2	Long-chain fatty acid transport protein 2	Color2 [A=255, R=169, G=169, B=169]	1	4		14.9207	14.8052	14.8364	15.0343	16.5919	16.4426	16.7083	16.7466	16.4283	16.4416	16.4108	16.3339
O14976	O14976	GAK_HUMAN	GAK	Cyclin-G-associated kinase	Color2 [A=255, R=169, G=169, B=169]	1	4		10.3168	12.5006	13.8462	13.8819	13.7379	14.2248	13.0218	14.2273	10.255	14.2782	14.2299	14.4288
O14978	O14978	ZN263_HUMAN	ZNF263	Zinc finger protein 263	Color2 [A=255, R=169, G=169, B=169]	1	4		11.6925	13.9329	14.8637	14.5733	9.19686	14.8999	14.1884	14.0634	13.2385	13.8075	14.4536	14.8349
O14979	O14979	HNRDL_HUMAN	HNRNPDL	Heterogeneous nuclear ribonucleoprotein D-like	Color2 [A=255, R=169, G=169, B=169]	1	4		19.7392	19.835	19.7819	19.7891	19.2192	18.7599	19.2089	18.9525	19.3534	19.9237	19.9001	19.9187
O14979;Q14103	O14979;Q14103	HNRDL_HUMAN;HNRPD_HUMAN	HNRNPD;HNRNPDL	Heterogeneous nuclear ribonucleoprotein D-like	Color2 [A=255, R=169, G=169, B=169]	1	4		22.0133	22.2386	22.1416	22.1661	21.551	20.8432	21.5868	20.7793	21.0181	21.8803	21.9886	21.7949
O14979;Q99729	O14979;Q99729	HNRDL_HUMAN;ROAA_HUMAN	HNRNPAB;HNRNPDL	Heterogeneous nuclear ribonucleoprotein D-like	Color2 [A=255, R=169, G=169, B=169]	1	4		20.0805	20.1518	19.5337	20.3949	19.7587	18.8407	19.2277	19.0179	19.3421	19.9632	20.0301	20.0953
O14980	O14980	XPO1_HUMAN	XPO1	Exportin-1	Color2 [A=255, R=169, G=169, B=169]	1	4		17.1504	17.7671	17.694	17.9337	17.5949	18.0586	18.1123	18.0472	17.5098	18.2936	18.0738	18.1132
O14981	O14981	BTAF1_HUMAN	BTAF1	TATA-binding protein-associated factor 172	Color2 [A=255, R=169, G=169, B=169]	1	4		14.2583	14.5059	14.2559	14.7022	14.6666	15.2693	15.1076	15.3941	14.6037	15.1348	15.23	15.452
O15013	O15013	ARHGA_HUMAN	ARHGEF10	Rho guanine nucleotide exchange factor 10	Color2 [A=255, R=169, G=169, B=169]	1	4		12.3853	12.288	11.6538	12.8393	11.7861	12.8312	14.0933	13.0338	11.8249	13.0659	13.5511	13.9059
O15014	O15014	ZN609_HUMAN	ZNF609	Zinc finger protein 609	Color2 [A=255, R=169, G=169, B=169]	1	4		14.8145	15.6895	15.7739	15.7456	15.6601	16.3519	15.8875	15.7845	15.6583	16.3622	16.401	16.4646
O15015	O15015	ZN646_HUMAN	ZNF646	Zinc finger protein 646	Color2 [A=255, R=169, G=169, B=169]	1	4		14.7975	16.4045	16.541	16.539	15.1984	16.9629	16.4809	16.4321	14.9402	16.6214	16.7271	16.607
O15020	O15020	SPTN2_HUMAN	SPTBN2	Spectrin beta chain, non-erythrocytic 2	Color2 [A=255, R=169, G=169, B=169]	1	4		14.8575	14.5582	15.1801	14.9225	15.7478	15.765	15.6356	15.7961	15.6266	16.4315	16.5126	16.6892
O15020;Q01082	O15020;P11277;Q01082	SPTB2_HUMAN;SPTN2_HUMAN	SPTBN1;SPTBN2	Spectrin beta chain, non-erythrocytic 2	Color2 [A=255, R=169, G=169, B=169]	1	4		11.4869	13.7004	14.5179	10.4654	11.6819	12.2204	13.1514	13.3819	13.4927	13.8542	14.5019	13.6495
O15021;O60307;P51812;Q15418;Q6P0Q8;Q96GX5;Q9Y2H9	O15021;O60307;P51812;Q15418;Q6P0Q8;Q96GX5;Q9UK32;Q9Y2H9	GWL_HUMAN;KS6A1_HUMAN;KS6A3_HUMAN;MAST1_HUMAN;MAST2_HUMAN;MAST3_HUMAN;MAST4_HUMAN	MAST1;MAST2;MAST3;MAST4;MASTL;RPS6KA1;RPS6KA3	Microtubule-associated serine/threonine-protein kinase 4	Color2 [A=255, R=169, G=169, B=169]	1	4		15.2505	14.4292	12.5796	15.7009	11.8017	11.2251	12.2606	16.7554	15.024	16.5722	11.4303	12.1099
O15021;Q6P0Q8;Q9Y2H9	O15021;Q6P0Q8;Q9Y2H9	MAST1_HUMAN;MAST2_HUMAN;MAST4_HUMAN	MAST1;MAST2;MAST4	Microtubule-associated serine/threonine-protein kinase 4	Color2 [A=255, R=169, G=169, B=169]	1	4		10.1373	12.2105	12.5363	10.9155	11.1227	11.2781	11.5176	11.4989	10.9232	12.3035	12.5691	11.9731
O15027	O15027	SC16A_HUMAN	SEC16A	Protein transport protein Sec16A	Color2 [A=255, R=169, G=169, B=169]	1	4		16.2721	16.3654	15.8569	16.3458	16.6828	16.7442	16.6243	16.4089	16.982	17.2629	17.1875	17.201
O15031	O15031	PLXB2_HUMAN	PLXNB2	Plexin-B2	Color2 [A=255, R=169, G=169, B=169]	1	4		17.6684	17.8872	17.7719	17.9214	17.9577	17.8883	17.9557	18.0418	17.8632	18.1443	18.1796	18.0938
O15031;Q9Y4D7	O15031;O60486;Q9Y4D7	PLXB2_HUMAN;PLXD1_HUMAN	PLXNB2;PLXND1	Plexin-B2	Color2 [A=255, R=169, G=169, B=169]	1	4		12.3604	13.9471	12.5082	13.9275	13.8533	13.2002	13.1327	13.7832	12.1383	11.4469	10.1802	13.8082
O15033	O15033	AREL1_HUMAN	AREL1	Apoptosis-resistant E3 ubiquitin protein ligase 1	Color2 [A=255, R=169, G=169, B=169]	1	4		14.9938	15.4236	14.9861	15.2906	15.6705	15.5023	15.4486	15.7065	15.1708	15.5354	15.7077	15.2002
O15034	O15034	RIMB2_HUMAN	RIMBP2	RIMS-binding protein 2	Color2 [A=255, R=169, G=169, B=169]	1	4		11.5403	10.9418	11.166	11.1437	11.6556	14.2313	13.7561	13.3723	11.5223	14.1723	13.5411	12.5742
O15040	O15040	TCPR2_HUMAN	TECPR2	Tectonin beta-propeller repeat-containing protein 2	Color2 [A=255, R=169, G=169, B=169]	1	4		9.74158	11.3575	10.9947	12.1385	12.2595	12.2156	10.356	11.1594	11.76	11.4524	11.7962	11.7543
O15042	O15042	SR140_HUMAN	U2SURP	U2 snRNP-associated SURP motif-containing protein	Color2 [A=255, R=169, G=169, B=169]	1	4		19.0093	18.8746	18.6758	18.8451	19.0717	19.0613	18.8818	18.6429	18.8806	19.0472	18.9421	18.5873
O15047	O15047	SET1A_HUMAN	SETD1A	Histone-lysine N-methyltransferase SETD1A	Color2 [A=255, R=169, G=169, B=169]	1	4		14.4035	14.5816	15.0453	14.5758	13.6355	14.7095	15.0835	14.4912	15.2348	15.0036	15.1805	14.55
O15049	O15049	N4BP3_HUMAN	N4BP3	NEDD4-binding protein 3	Color2 [A=255, R=169, G=169, B=169]	1	4		9.98936	9.70574	13.6719	11.454	13.883	14.3895	14.4775	13.6416	14.1877	14.3329	14.1279	14.5262
O15054	O15054	KDM6B_HUMAN	KDM6B	Lysine-specific demethylase 6B	Color2 [A=255, R=169, G=169, B=169]	1	4		13.4945	16.0625	15.846	15.8892	14.7213	16.2508	15.9816	15.9762	14.57	16.3982	16.2961	16.246
O15060	O15060	ZBT39_HUMAN	ZBTB39	Zinc finger and BTB domain-containing protein 39	Color2 [A=255, R=169, G=169, B=169]	1	4		13.7199	12.6093	14.1433	13.6611	14.1164	13.5088	13.6052	14.0879	13.7335	14.5738	14.7465	14.5864
O15060;P17041;P58317;Q8TAQ5	O15060;P17027;P17041;P58317;Q86UE3;Q8N8L2;Q8TAQ5;Q6ZSS3;Q96NG8	ZBT39_HUMAN;ZN121_HUMAN;ZN420_HUMAN;ZNF32_HUMAN	ZBTB39;ZNF121;ZNF32;ZNF420	Zinc finger and BTB domain-containing protein 39	Color2 [A=255, R=169, G=169, B=169]	1	4		10.6719	15.8877	14.4998	13.9197	15.2497	15.8109	14.8639	16.1963	15.1845	15.5899	15.3192	14.4871
O15061	O15061	SYNEM_HUMAN	SYNM	Synemin	Color2 [A=255, R=169, G=169, B=169]	1	4		17.9137	17.5883	17.4408	17.3981	17.9648	18.0835	17.8531	17.6377	17.7406	17.9814	17.8355	17.4554
O15062	O15062	ZBTB5_HUMAN	ZBTB5	Zinc finger and BTB domain-containing protein 5	Color2 [A=255, R=169, G=169, B=169]	1	4		10.6324	14.274	14.0407	13.7994	13.4316	13.5798	13.8781	13.8906	13.8251	14.4876	14.441	13.9009
O15067	O15067	PUR4_HUMAN	PFAS	Phosphoribosylformylglycinamidine synthase	Color2 [A=255, R=169, G=169, B=169]	1	4		14.6789	14.7087	14.9333	15.0062	14.7575	14.9221	15.1874	15.3122	14.6495	15.4066	15.6167	15.9313
O15068	O15068	MCF2L_HUMAN	MCF2L	Guanine nucleotide exchange factor DBS	Color2 [A=255, R=169, G=169, B=169]	1	4		11.6223	10.5114	11.4044	12.3836	13.005	13.4386	13.9085	13.0692	13.9014	14.8423	13.8428	14.2932
O15069	O15069	NACAD_HUMAN	NACAD	NAC-alpha domain-containing protein 1	Color2 [A=255, R=169, G=169, B=169]	1	4		13.9831	15.0947	14.6304	15.1062	15.7106	16.5228	15.9442	16.0805	15.4443	16.903	16.3877	16.5582
O15075	O15075	DCLK1_HUMAN	DCLK1	Serine/threonine-protein kinase DCLK1	Color2 [A=255, R=169, G=169, B=169]	1	4		14.054	13.9332	12.8229	14.3335	17.4493	18.1662	18.0691	17.9291	17.6771	18.5138	18.5178	18.4679
O15075;O43602	O15075;O43602	DCLK1_HUMAN;DCX_HUMAN	DCLK1;DCX	Serine/threonine-protein kinase DCLK1	Color2 [A=255, R=169, G=169, B=169]	1	4		10.0148	11.2229	11.0944	11.8615	16.2707	16.4642	16.5113	16.6473	15.7777	16.9803	16.9119	16.6912
O15075;Q8N568	O15075;Q8N568	DCLK1_HUMAN;DCLK2_HUMAN	DCLK1;DCLK2	Serine/threonine-protein kinase DCLK1	Color2 [A=255, R=169, G=169, B=169]	1	4		9.50107	10.9314	11.1859	10.3567	12.1051	12.4606	12.3621	12.18	12.6498	12.2734	12.5744	12.4325
O15078	O15078	CE290_HUMAN	CEP290	Centrosomal protein of 290 kDa	Color2 [A=255, R=169, G=169, B=169]	1	4		10.3116	18.259	18.3957	18.1535	18.7125	12.0442	18.6683	9.72148	18.7976	18.964	17.8469	11.6189
O15084	O15084	ANR28_HUMAN	ANKRD28	Serine/threonine-protein phosphatase 6 regulatory ankyrin repeat subunit A	Color2 [A=255, R=169, G=169, B=169]	1	4		12.3209	12.9445	12.5848	13.4418	14.7771	13.1583	14.0845	13.1302	12.9211	12.8712	13.9247	13.6048
O15085	O15085	ARHGB_HUMAN	ARHGEF11	Rho guanine nucleotide exchange factor 11	Color2 [A=255, R=169, G=169, B=169]	1	4		13.2975	12.6185	12.7475	12.7476	13.5192	13.4877	13.9141	13.4788	13.5078	14.5015	14.3113	13.621
O15090	O15090	ZN536_HUMAN	ZNF536	Zinc finger protein 536	Color2 [A=255, R=169, G=169, B=169]	1	4		15.2548	16.4303	16.8715	16.5978	16.3023	17.3896	17.1203	16.9061	15.8628	17.1625	17.2759	17.2
O15090;O75362;Q92618	O75362;Q92618;O15090	ZN217_HUMAN;ZN516_HUMAN;ZN536_HUMAN	ZNF217;ZNF516;ZNF536	Zinc finger protein 536	Color2 [A=255, R=169, G=169, B=169]	1	4		9.9078	14.4511	15.5137	14.8863	14.269	16.2305	12.1794	15.9283	13.6068	16.2928	14.9	15.9073
O15091	O15091	MRPP3_HUMAN	PRORP	Mitochondrial ribonuclease P catalytic subunit	Color2 [A=255, R=169, G=169, B=169]	1	4		22.3285	21.8012	21.8093	21.9865	22.0662	21.8061	22.0391	22.0232	21.8994	21.4024	21.222	21.0922
O15111	O15111	IKKA_HUMAN	CHUK	Inhibitor of nuclear factor kappa-B kinase subunit alpha	Color2 [A=255, R=169, G=169, B=169]	1	4		11.8912	10.7804	13.3638	14.137	12.9674	12.9767	13.3321	13.1261	13.5509	12.7451	13.3213	13.5856
O15118	O15118	NPC1_HUMAN	NPC1	NPC intracellular cholesterol transporter 1	Color2 [A=255, R=169, G=169, B=169]	1	4		15.5466	15.6756	15.3834	15.3302	15.5217	15.3627	15.5588	15.9367	15.4117	15.4549	15.4057	15.0936
O15119	O15119	TBX3_HUMAN	TBX3	T-box transcription factor TBX3	Color2 [A=255, R=169, G=169, B=169]	1	4		11.5921	11.1654	12.0896	10.454	14.7903	15.3694	14.8099	14.5485	14.5095	16.5033	16.4579	16.375
O15119;Q13207	O15119;Q13207	TBX2_HUMAN;TBX3_HUMAN	TBX2;TBX3	T-box transcription factor TBX3	Color2 [A=255, R=169, G=169, B=169]	1	4		13.1179	14.3832	15.0439	8.69466	13.8427	15.5071	16.2746	15.234	13.4949	14.9098	15.9117	15.4116
O15120	O15120	PLCB_HUMAN	AGPAT2	1-acyl-sn-glycerol-3-phosphate acyltransferase beta	Color2 [A=255, R=169, G=169, B=169]	1	4		15.913	16.3497	16.4391	16.2566	17.0591	16.8911	17.1194	17.5345	17.3718	17.2224	17.0074	16.6892
O15121	O15121	DEGS1_HUMAN	DEGS1	Sphingolipid delta(4)-desaturase DES1	Color2 [A=255, R=169, G=169, B=169]	1	4		16.158	16.381	16.0706	16.1514	16.0223	15.7796	15.9132	16.0571	15.8987	15.803	15.8656	15.4051
O15126	O15126	SCAM1_HUMAN	SCAMP1	Secretory carrier-associated membrane protein 1	Color2 [A=255, R=169, G=169, B=169]	1	4		16.2629	16.3643	16.2206	16.1451	15.9836	16.0835	16.3728	16.3349	16.7422	16.2038	16.3363	16.0945
O15127	O15127	SCAM2_HUMAN	SCAMP2	Secretory carrier-associated membrane protein 2	Color2 [A=255, R=169, G=169, B=169]	1	4		15.7293	15.6144	16.0609	15.2212	15.85	14.9467	12.995	16.5013	16.6289	16.4965	15.5578	15.677
O15131	O15131	IMA6_HUMAN	KPNA5	Importin subunit alpha-6	Color2 [A=255, R=169, G=169, B=169]	1	4		13.8905	15.9875	16.1814	16.3375	16.6067	16.8575	16.7193	16.4791	15.9913	16.9324	16.3983	16.9036
O15131;O60684	O15131;O60684	IMA6_HUMAN;IMA7_HUMAN	KPNA5;KPNA6	Importin subunit alpha-6	Color2 [A=255, R=169, G=169, B=169]	1	4		15.4834	16.2238	16.0303	16.271	16.5236	16.8974	16.9193	16.6596	16.7901	16.7884	17.1099	16.8831
O15131;O60684;P52294	O15131;O60684;P52294	IMA5_HUMAN;IMA6_HUMAN;IMA7_HUMAN	KPNA1;KPNA5;KPNA6	Importin subunit alpha-6	Color2 [A=255, R=169, G=169, B=169]	1	4		16.2574	16.7117	16.5871	16.7133	16.6679	16.8957	16.6515	16.933	16.6758	17.2207	17.1308	16.8151
O15143	O15143	ARC1B_HUMAN	ARPC1B	Actin-related protein 2/3 complex subunit 1B	Color2 [A=255, R=169, G=169, B=169]	1	4		14.3486	14.7669	14.1621	14.5562	15.5834	15.2705	15.4815	15.7888	15.0861	15.6684	15.4777	15.7143
O15143;Q92747	O15143;Q92747	ARC1A_HUMAN;ARC1B_HUMAN	ARPC1A;ARPC1B	Actin-related protein 2/3 complex subunit 1B	Color2 [A=255, R=169, G=169, B=169]	1	4		13.3039	13.9613	13.1979	13.2505	14.265	14.3252	14.726	14.0592	12.9013	13.1548	12.5222	14.759
O15144	O15144	ARPC2_HUMAN	ARPC2	Actin-related protein 2/3 complex subunit 2	Color2 [A=255, R=169, G=169, B=169]	1	4		13.8704	14.3531	13.8102	14.5503	14.9094	15.4217	15.2941	14.5863	15.1665	15.9329	15.7093	15.8126
O15145	O15145	ARPC3_HUMAN	ARPC3	Actin-related protein 2/3 complex subunit 3	Color2 [A=255, R=169, G=169, B=169]	1	4		15.6886	15.692	16.4886	16.4616	17.2002	17.2517	17.0642	17.1007	17.1117	17.7254	17.8505	17.6632
O15155	O15155	BET1_HUMAN	BET1	BET1 homolog	Color2 [A=255, R=169, G=169, B=169]	1	4		18.2994	18.2269	18.773	18.564	19.0571	19.3101	18.8425	18.7877	19.1556	19.5271	19.4892	19.8457
O15156	O15156	ZBT7B_HUMAN	ZBTB7B	Zinc finger and BTB domain-containing protein 7B	Color2 [A=255, R=169, G=169, B=169]	1	4		13.8372	13.4164	12.8044	13.0308	14.0299	14.4591	14.025	13.1999	13.8152	14.3158	14.2456	14.5616
O15160	O15160	RPAC1_HUMAN	POLR1C	DNA-directed RNA polymerases I and III subunit RPAC1	Color2 [A=255, R=169, G=169, B=169]	1	4		17.8242	18.0741	18.2553	18.1983	18.7019	18.5964	18.4462	18.3778	18.302	18.6386	18.8192	18.9359
O15164	O15164	TIF1A_HUMAN	TRIM24	Transcription intermediary factor 1-alpha	Color2 [A=255, R=169, G=169, B=169]	1	4		16.253	17.5865	17.634	17.4997	16.6658	17.1401	16.898	16.7525	16.5569	17.3051	17.2229	17.2573
O15173	O15173	PGRC2_HUMAN	PGRMC2	Membrane-associated progesterone receptor component 2	Color2 [A=255, R=169, G=169, B=169]	1	4		18.022	18.4083	18.2503	18.3006	18.3528	18.2636	18.3546	18.3856	17.6103	17.9818	17.9299	17.8286
O15182	O15182	CETN3_HUMAN	CETN3	Centrin-3	Color2 [A=255, R=169, G=169, B=169]	1	4		10.7828	10.163	11.6421	11.0942	10.7006	10.423	12.8086	12.6145	11.2577	11.4732	12.5067	10.9511
O15194	O15194	CTDSL_HUMAN	CTDSPL	CTD small phosphatase-like protein	Color2 [A=255, R=169, G=169, B=169]	1	4		12.1134	12.8576	13.1728	11.0977	9.70318	14.6522	9.63541	10.2582	10.884	11.0811	11.6469	12.6472
O15198	O15198	SMAD9_HUMAN	SMAD9	Mothers against decapentaplegic homolog 9	Color2 [A=255, R=169, G=169, B=169]	1	4		14.2544	13.719	13.5657	13.3308	13.2638	13.2733	13.6916	13.1099	12.6545	12.9129	13.388	10.9148
O15198;P84022;Q15796	O15198;P84022;Q15796	SMAD2_HUMAN;SMAD3_HUMAN;SMAD9_HUMAN	SMAD2;SMAD3;SMAD9	Mothers against decapentaplegic homolog 9	Color2 [A=255, R=169, G=169, B=169]	1	4		12.1244	13.0515	14.0746	13.9058	14.675	14.2311	14.8143	13.9486	13.4504	14.4628	16.1433	15.2143
O15198;P84022;Q15796;Q15797;Q99717	O15198;P84022;Q15796;Q15797;Q99717	SMAD1_HUMAN;SMAD2_HUMAN;SMAD3_HUMAN;SMAD5_HUMAN;SMAD9_HUMAN	SMAD1;SMAD2;SMAD3;SMAD5;SMAD9	Mothers against decapentaplegic homolog 9	Color2 [A=255, R=169, G=169, B=169]	1	4		15.1658	16.1158	16.2587	16.0879	15.1729	16.1923	16.6282	16.5136	16.0076	16.0727	16.9107	16.6291
O15212	O15212	PFD6_HUMAN	PFDN6	Prefoldin subunit 6	Color2 [A=255, R=169, G=169, B=169]	1	4		11.6922	10.4601	11.7522	11.2263	10.5295	12.2484	11.0923	12.2464	12.4373	13.603	13.1222	14.0842
O15213	O15213	WDR46_HUMAN	WDR46	WD repeat-containing protein 46	Color2 [A=255, R=169, G=169, B=169]	1	4		17.5807	18.5324	18.2585	18.2312	18.2818	18.5583	18.4112	18.7067	18.0331	18.7283	18.5666	18.7212
O15226	O15226	NKRF_HUMAN	NKRF	NF-kappa-B-repressing factor	Color2 [A=255, R=169, G=169, B=169]	1	4		19.2819	19.798	19.6473	19.7943	19.5387	19.7067	19.6969	19.6072	19.3387	19.9457	19.8039	19.778
O15228	O15228	GNPAT_HUMAN	GNPAT	Dihydroxyacetone phosphate acyltransferase	Color2 [A=255, R=169, G=169, B=169]	1	4		16.4325	16.6138	16.654	16.7731	16.809	16.6519	16.7269	16.9365	16.8979	17.0284	17.0915	16.9922
O15230	O15230	LAMA5_HUMAN	LAMA5	Laminin subunit alpha-5	Color2 [A=255, R=169, G=169, B=169]	1	4		15.9216	15.7457	15.8609	15.6925	17.4244	17.4433	17.5352	17.4738	17.4827	17.6898	17.491	17.434
O15234	O15234	CASC3_HUMAN	CASC3	Protein CASC3	Color2 [A=255, R=169, G=169, B=169]	1	4		9.70339	11.6697	11.3901	11.8114	10.7246	12.4492	9.82578	15.4122	15.1299	11.7668	9.89145	11.3432
O15235	O15235	RT12_HUMAN	MRPS12	28S ribosomal protein S12, mitochondrial	Color2 [A=255, R=169, G=169, B=169]	1	4		21.904	21.4783	21.615	21.6687	21.9496	21.5121	21.6845	21.8116	21.8643	21.3695	21.2142	21.3721
O15239	O15239	NDUA1_HUMAN	NDUFA1	NADH dehydrogenase [ubiquinone] 1 alpha subcomplex subunit 1	Color2 [A=255, R=169, G=169, B=169]	1	4		14.9398	14.7597	14.7983	14.9956	13.9627	14.029	14.6408	15.4133	14.2711	14.1375	14.0039	12.8883
O15240	O15240	VGF_HUMAN	VGF	Neurosecretory protein VGF	Color2 [A=255, R=169, G=169, B=169]	1	4		13.5538	13.161	15.2112	14.5005	16.5081	16.75	16.5953	16.8291	16.9044	16.8977	16.9503	17.0046
O15243	O15243	OBRG_HUMAN	LEPROT	Leptin receptor gene-related protein	Color2 [A=255, R=169, G=169, B=169]	1	4		13.5039	14.0368	12.8421	13.5386	12.2581	13.5984	14.1929	13.8855	13.6661	13.2357	13.3548	12.6235
O15254	O15254	ACOX3_HUMAN	ACOX3	Peroxisomal acyl-coenzyme A oxidase 3	Color2 [A=255, R=169, G=169, B=169]	1	4		16.5643	17.0323	17.0461	17.3435	18.217	18.3408	18.0854	18.0872	18.1011	18.6625	18.4333	18.4527
O15258	O15258	RER1_HUMAN	RER1	Protein RER1	Color2 [A=255, R=169, G=169, B=169]	1	4		19.1609	19.6206	19.1967	19.2262	19.7686	19.7166	19.8843	19.5461	19.5993	19.3419	19.5	18.8545
O15260	O15260	SURF4_HUMAN	SURF4	Surfeit locus protein 4	Color2 [A=255, R=169, G=169, B=169]	1	4		19.191	19.4456	19.2133	19.3509	19.4517	19.5941	19.6334	19.7002	19.5254	19.4625	19.4805	18.6303
O15265	O15265	ATX7_HUMAN	ATXN7	Ataxin-7	Color2 [A=255, R=169, G=169, B=169]	1	4		12.8646	13.7806	13.802	15.0334	14.1296	14.971	14.9528	14.2772	14.805	15.1934	14.9332	14.9184
O15269	O15269	SPTC1_HUMAN	SPTLC1	Serine palmitoyltransferase 1	Color2 [A=255, R=169, G=169, B=169]	1	4		18.3873	18.5498	18.1132	18.28	18.483	18.419	18.5998	18.406	18.5814	18.4277	18.5017	18.3988
O15270	O15270	SPTC2_HUMAN	SPTLC2	Serine palmitoyltransferase 2	Color2 [A=255, R=169, G=169, B=169]	1	4		18.0286	18.2052	18.1212	18.3217	18.673	18.5191	18.6681	18.8027	18.6478	18.7154	18.593	18.4494
O15287	O15287	FANCG_HUMAN	FANCG	Fanconi anemia group G protein	Color2 [A=255, R=169, G=169, B=169]	1	4		12.307	13.6896	13.5946	14.1307	13.5453	13.9812	13.9364	13.5675	13.0579	13.2744	13.3839	13.3514
O15294	O15294	OGT1_HUMAN	OGT	UDP-N-acetylglucosamine--peptide N-acetylglucosaminyltransferase 110 kDa subunit	Color2 [A=255, R=169, G=169, B=169]	1	4		17.8307	18.768	18.8774	18.6251	18.0909	19.2638	18.916	18.884	18.163	19.1108	19.134	18.8767
O15297	O15297	PPM1D_HUMAN	PPM1D	Protein phosphatase 1D	Color2 [A=255, R=169, G=169, B=169]	1	4		16.7975	17.3207	17.1337	17.3728	16.0479	16.636	16.119	16.1798	16.2057	16.5951	16.4235	16.1519
O15305	O15305	PMM2_HUMAN	PMM2	Phosphomannomutase 2	Color2 [A=255, R=169, G=169, B=169]	1	4		11.1169	10.7973	10.8812	11.8753	12.1309	11.6448	11.5669	10.7602	10.8193	13.0421	12.5169	12.0675
O15305;Q92871	O15305;Q92871	PMM1_HUMAN;PMM2_HUMAN	PMM1;PMM2	Phosphomannomutase 2	Color2 [A=255, R=169, G=169, B=169]	1	4		11.9147	10.2904	10.5297	12.7701	12.0626	11.4952	12.6676	13.1856	8.99595	11.6276	13.6595	12.6162
O15315	O15315	RA51B_HUMAN	RAD51B	DNA repair protein RAD51 homolog 2	Color2 [A=255, R=169, G=169, B=169]	1	4		14.496	13.2121	11.8666	13.9574	13.7826	13.9274	14.139	12.7224	14.0969	14.3852	14.6349	14.1498
O15321	O15321	TM9S1_HUMAN	TM9SF1	Transmembrane 9 superfamily member 1	Color2 [A=255, R=169, G=169, B=169]	1	4		16.6844	17.2331	16.6886	17.1094	17.3372	16.9175	17.3557	17.1729	16.5047	17.1659	17.1843	16.29
O15344	O15344	TRI18_HUMAN	MID1	E3 ubiquitin-protein ligase Midline-1	Color2 [A=255, R=169, G=169, B=169]	1	4		9.41911	10.2098	11.5613	10.6906	10.5633	12.645	12.9793	11.9284	11.4406	13.5288	13.0074	13.027
O15347	O15347	HMGB3_HUMAN	HMGB3	High mobility group protein B3	Color2 [A=255, R=169, G=169, B=169]	1	4		15.8037	14.7353	14.7598	15.4518	16.6388	16.2757	16.8644	17.0757	16.9364	17.171	17.6575	17.9973
O15350	O15350	P73_HUMAN	TP73	Tumor protein p73	Color2 [A=255, R=169, G=169, B=169]	1	4		18.5184	20.1367	20.1744	19.9899	19.1193	20.4346	20.0898	20.0578	18.8835	20.3289	20.3984	20.1898
O15355	O15355	PPM1G_HUMAN	PPM1G	Protein phosphatase 1G	Color2 [A=255, R=169, G=169, B=169]	1	4		13.772	13.9441	14.1247	13.8464	13.88	14.6259	14.2248	13.8934	14.1043	14.6306	14.44	14.7021
O15357	O15357	SHIP2_HUMAN	INPPL1	Phosphatidylinositol 3,4,5-trisphosphate 5-phosphatase 2	Color2 [A=255, R=169, G=169, B=169]	1	4		11.1821	12.9515	12.6827	12.3711	12.6955	13.4385	13.1157	12.8073	13.3095	13.6899	13.8049	14.0151
O15360	O15360	FANCA_HUMAN	FANCA	Fanconi anemia group A protein	Color2 [A=255, R=169, G=169, B=169]	1	4		14.8249	16.0181	16.2027	16.1249	15.2316	15.9798	15.9948	16.1374	14.7005	16.0792	16.0209	16.0543
O15371	O15371	EIF3D_HUMAN	EIF3D	Eukaryotic translation initiation factor 3 subunit D	Color2 [A=255, R=169, G=169, B=169]	1	4		14.2983	14.7996	15.4595	15.3449	15.47	15.4348	15.1147	15.9157	15.565	15.8007	15.9453	16.0404
O15372	O15372	EIF3H_HUMAN	EIF3H	Eukaryotic translation initiation factor 3 subunit H	Color2 [A=255, R=169, G=169, B=169]	1	4		13.3476	13.2016	13.3659	12.4837	12.7973	12.6651	13.2154	12.9543	13.2417	13.6043	14.1547	13.6353
O15379	O15379	HDAC3_HUMAN	HDAC3	Histone deacetylase 3	Color2 [A=255, R=169, G=169, B=169]	1	4		16.3564	16.7249	16.6188	16.8259	16.6584	17.0532	16.843	16.4379	16.2559	16.6909	16.9071	16.5084
O15379;Q13547;Q92769	O15379;Q13547;Q92769	HDAC1_HUMAN;HDAC2_HUMAN;HDAC3_HUMAN	HDAC1;HDAC2;HDAC3	Histone deacetylase 3	Color2 [A=255, R=169, G=169, B=169]	1	4		15.8789	16.7498	16.4913	16.5429	15.6608	16.7797	16.6657	16.6274	15.7757	16.7601	15.8898	15.8544
O15381	O15381	NVL_HUMAN	NVL	Nuclear valosin-containing protein-like	Color2 [A=255, R=169, G=169, B=169]	1	4		18.0068	18.6695	18.646	18.8023	17.6929	18.1357	18.4196	18.5321	18.0319	19.2114	19.0746	19.3931
O15382	O15382	BCAT2_HUMAN	BCAT2	Branched-chain-amino-acid aminotransferase, mitochondrial	Color2 [A=255, R=169, G=169, B=169]	1	4		18.3495	18.2024	18.151	18.28	18.2318	17.9437	17.8989	18.2078	18.1545	17.886	17.6893	17.5682
O15391	O15391	TYY2_HUMAN	YY2	Transcription factor YY2	Color2 [A=255, R=169, G=169, B=169]	1	4		12.3256	12.3352	9.94719	9.46031	10.7701	11.6705	10.3323	11.5164	11.1016	15.0078	11.203	11.7188
O15391;P25490	O15391;P25490	TYY1_HUMAN;TYY2_HUMAN	YY1;YY2	Transcription factor YY2	Color2 [A=255, R=169, G=169, B=169]	1	4		14.1786	15.5558	14.9695	14.8756	15.2472	15.4341	15.303	15.6979	14.1516	14.4985	14.964	15.0447
O15392	O15392	BIRC5_HUMAN	BIRC5	Baculoviral IAP repeat-containing protein 5	Color2 [A=255, R=169, G=169, B=169]	1	4		15.2644	15.5854	16.3473	15.7652	16.0721	16.525	15.7051	15.8814	16.0795	16.0165	16.0849	16.3196
O15394	O15394	NCAM2_HUMAN	NCAM2	Neural cell adhesion molecule 2	Color2 [A=255, R=169, G=169, B=169]	1	4		13.9783	14.2131	14.7244	14.7222	13.6824	13.4796	14.5666	13.3582	12.9757	13.4743	14.2059	14.1465
O15397	O15397	IPO8_HUMAN	IPO8	Importin-8	Color2 [A=255, R=169, G=169, B=169]	1	4		15.2649	15.6951	14.5301	15.3253	15.4997	14.2225	14.9237	15.5201	12.939	14.9137	14.7354	15.3247
O15397;O95373	O15397;O95373	IPO7_HUMAN;IPO8_HUMAN	IPO7;IPO8	Importin-8	Color2 [A=255, R=169, G=169, B=169]	1	4		12.946	13.8459	13.224	14.5021	14.0935	14.7339	14.8655	14.2184	13.7362	13.8553	15.2122	14.4163
O15400	O15400	STX7_HUMAN	STX7	Syntaxin-7	Color2 [A=255, R=169, G=169, B=169]	1	4		15.8482	16.1138	15.8022	16.1754	16.8776	16.2254	16.5224	16.8685	15.9862	16.4604	16.6908	15.7655
O15417	O15417	TNC18_HUMAN	TNRC18	Trinucleotide repeat-containing gene 18 protein	Color2 [A=255, R=169, G=169, B=169]	1	4		15.6236	15.9402	15.9091	16.0566	15.46	16.2929	16.1348	15.8227	15.3628	16.4031	16.567	16.3501
O15431	O15431	COPT1_HUMAN	SLC31A1	High affinity copper uptake protein 1	Color2 [A=255, R=169, G=169, B=169]	1	4		14.9974	16.1598	15.7019	14.8136	15.6658	16.008	16.4182	16.6548	14.8949	15.3013	15.6937	15.3857
O15439	O15439	MRP4_HUMAN	ABCC4	ATP-binding cassette sub-family C member 4	Color2 [A=255, R=169, G=169, B=169]	1	4		17.6831	18.0255	17.7591	17.9234	18.0815	18.1857	18.2011	18.2257	18.1032	18.2143	18.2824	17.9625
O15439;P33527	O15438;O15439;P33527	MRP1_HUMAN;MRP4_HUMAN	ABCC1;ABCC4	ATP-binding cassette sub-family C member 4	Color2 [A=255, R=169, G=169, B=169]	1	4		15.3296	16.1695	16.2767	16.2071	16.1081	16.1897	16.1129	16.4624	16.5219	16.732	16.6547	16.2724
O15440	O15440	MRP5_HUMAN	ABCC5	ATP-binding cassette sub-family C member 5	Color2 [A=255, R=169, G=169, B=169]	1	4		13.1085	12.754	13.5255	11.8853	12.0208	12.2528	13.1486	13.0226	12.974	14.0765	12.6211	12.5965
O15446	O15446	RPA34_HUMAN	POLR1G	DNA-directed RNA polymerase I subunit RPA34	Color2 [A=255, R=169, G=169, B=169]	1	4		17.2003	17.9613	18.1365	17.9282	18.251	18.6238	18.0068	18.1276	18.1185	18.5442	18.4946	18.7641
O15460	O15460	P4HA2_HUMAN	P4HA2	Prolyl 4-hydroxylase subunit alpha-2	Color2 [A=255, R=169, G=169, B=169]	1	4		15.1621	15.6553	15.3288	15.2098	16.8128	16.9066	17.2094	16.7337	15.611	17.3098	17.2525	17.4215
O15484	O15484	CAN5_HUMAN	CAPN5	Calpain-5	Color2 [A=255, R=169, G=169, B=169]	1	4		15.4107	15.6144	15.1775	15.8037	16.6467	16.5131	16.7244	16.6398	16.6584	16.6101	16.6541	16.6487
O15492	O15492	RGS16_HUMAN	RGS16	Regulator of G-protein signaling 16	Color2 [A=255, R=169, G=169, B=169]	1	4		12.6306	12.8263	12.9863	13.487	12.4592	12.2958	12.4452	13.845	13.3849	13.4302	12.8331	13.7751
O15498	O15498	YKT6_HUMAN	YKT6	Synaptobrevin homolog YKT6	Color2 [A=255, R=169, G=169, B=169]	1	4		14.767	15.3402	15.0188	15.8451	15.194	15.4505	15.9373	15.9132	14.611	15.8559	15.8521	15.7272
O15503	O15503	INSI1_HUMAN	INSIG1	Insulin-induced gene 1 protein	Color2 [A=255, R=169, G=169, B=169]	1	4		13.3818	11.5596	13.7083	10.4845	14.2461	12.1972	12.6981	13.281	10.8776	13.2967	13.6207	13.978
O15504	O15504	NUP42_HUMAN	NUP42	Nucleoporin NUP42	Color2 [A=255, R=169, G=169, B=169]	1	4		18.5025	18.2429	18.4329	18.3469	18.3373	18.2746	18.116	18.0433	18.3827	18.2295	18.0547	17.8403
O15511	O15511	ARPC5_HUMAN	ARPC5	Actin-related protein 2/3 complex subunit 5	Color2 [A=255, R=169, G=169, B=169]	1	4		13.2069	14.3583	13.4239	14.3917	15.703	15.3408	15.0715	14.8602	16.0314	16.0192	15.5265	16.223
O15516	O15516	CLOCK_HUMAN	CLOCK	Circadian locomoter output cycles protein kaput	Color2 [A=255, R=169, G=169, B=169]	1	4		11.1939	12.9848	13.5278	13.6706	13.0466	13.9487	13.5687	13.547	13.6697	14.0657	13.7005	13.8934
O15522	O15522	NKX28_HUMAN	NKX2-8	Homeobox protein Nkx-2.8	Color2 [A=255, R=169, G=169, B=169]	1	4		21.4429	20.943	21.0292	20.4982	20.3165	20.3299	20.6562	20.8627	21.0113	19.8728	19.4879	19.1338
O15525	O15525	MAFG_HUMAN	MAFG	Transcription factor MafG	Color2 [A=255, R=169, G=169, B=169]	1	4		14.4751	14.8049	14.8816	15.0489	14.2063	14.6074	15.0987	15.3572	14.7735	14.8709	15.297	14.4376
O15525;O60675	O15525;O60675	MAFG_HUMAN;MAFK_HUMAN	MAFG;MAFK	Transcription factor MafG	Color2 [A=255, R=169, G=169, B=169]	1	4		13.3191	12.0263	11.1462	12.3682	9.8899	11.3448	13.4275	13.0713	12.0147	14.3546	12.5243	13.7494
O15525;O60675;Q9ULX9	O15525;O60675;Q9ULX9	MAFF_HUMAN;MAFG_HUMAN;MAFK_HUMAN	MAFF;MAFG;MAFK	Transcription factor MafG	Color2 [A=255, R=169, G=169, B=169]	1	4		15.2008	15.4186	15.0583	15.5986	15.3547	16.096	14.5109	15.1373	15.4061	15.8057	16.2105	15.8589
O15527	O15527	OGG1_HUMAN	OGG1	N-glycosylase/DNA lyase	Color2 [A=255, R=169, G=169, B=169]	1	4		13.5936	15.3177	13.5702	14.787	13.0598	14.56	14.0394	13.6873	14.3353	14.2558	14.4899	13.7876
O15528	O15528	CP27B_HUMAN	CYP27B1	25-hydroxyvitamin D-1 alpha hydroxylase, mitochondrial	Color2 [A=255, R=169, G=169, B=169]	1	4		12.2539	11.6006	12.394	10.6429	13.9629	13.766	13.8817	13.3875	14.2328	14.2178	14.0988	13.6134
O15530	O15530;Q6A1A2	PDPK1_HUMAN	PDPK1	3-phosphoinositide-dependent protein kinase 1	Color2 [A=255, R=169, G=169, B=169]	1	4		12.0027	12.1755	12.1356	10.1885	11.1459	10.7088	11.1626	12.6003	12.1608	12.3699	11.6774	12.4251
O15533	O15533	TPSN_HUMAN	TAPBP	Tapasin	Color2 [A=255, R=169, G=169, B=169]	1	4		15.1472	15.945	16.2067	16.2075	18.5732	18.5597	18.4998	18.7022	18.5905	19.1768	18.6581	18.3207
O15534	O15534	PER1_HUMAN	PER1	Period circadian protein homolog 1	Color2 [A=255, R=169, G=169, B=169]	1	4		11.2646	12.917	11.7665	12.8828	12.7385	13.8276	13.1602	13.3071	13.8045	12.7021	12.7724	14.2144
O15535	O15535	ZSC9_HUMAN	ZSCAN9	Zinc finger and SCAN domain-containing protein 9	Color2 [A=255, R=169, G=169, B=169]	1	4		9.71416	12.0925	11.3302	10.9962	10.4164	11.6397	12.3527	9.08537	12.1786	13.2249	13.2271	12.6032
O15535;O75123;Q8NF99;Q8TAU3	O15535;Q8NF99;Q8TAU3;O75123;Q8TAW3	ZN397_HUMAN;ZN417_HUMAN;ZN623_HUMAN;ZSC9_HUMAN	ZNF397;ZNF417;ZNF623;ZSCAN9	Zinc finger and SCAN domain-containing protein 9	Color2 [A=255, R=169, G=169, B=169]	1	4		13.9904	11.9249	13.8126	10.5891	12.4468	13.6389	13.1674	11.3664	13.4071	14.083	11.4284	14.4791
O15541	O15541	R113A_HUMAN	RNF113A	E3 ubiquitin-protein ligase RNF113A	Color2 [A=255, R=169, G=169, B=169]	1	4		16.4821	15.8173	16.3433	15.9885	16.1745	15.8756	16.5703	15.4743	16.6898	15.6338	16.4557	15.8729
O15550	O15550	KDM6A_HUMAN	KDM6A	Lysine-specific demethylase 6A	Color2 [A=255, R=169, G=169, B=169]	1	4		15.0421	15.8458	15.7862	15.6702	15.6185	16.2305	15.8293	15.7379	15.8091	16.2147	16.2445	15.9427
O43143	O43143	DHX15_HUMAN	DHX15	ATP-dependent RNA helicase DHX15	Color2 [A=255, R=169, G=169, B=169]	1	4		20.5018	20.7921	20.8299	20.8396	20.8697	20.9315	20.8571	20.8497	20.5621	21.0696	20.9969	20.8208
O43143;O60231;Q14562	O43143;O60231;Q14562	DHX15_HUMAN;DHX16_HUMAN;DHX8_HUMAN	DHX15;DHX16;DHX8	ATP-dependent RNA helicase DHX15	Color2 [A=255, R=169, G=169, B=169]	1	4		17.3732	17.8986	17.5658	17.6404	17.0461	17.8693	17.7162	18.1382	16.97	18.1153	17.4948	17.466
O43148	O43148	MCES_HUMAN	RNMT	mRNA cap guanine-N7 methyltransferase	Color2 [A=255, R=169, G=169, B=169]	1	4		16.9246	16.5164	16.3699	16.7958	16.5478	15.8502	15.9866	16.0662	16.8215	16.6548	16.2894	16.9259
O43149	O43149	ZZEF1_HUMAN	ZZEF1	Zinc finger ZZ-type and EF-hand domain-containing protein 1	Color2 [A=255, R=169, G=169, B=169]	1	4		13.9545	14.5201	13.2946	13.8164	14.3715	13.6726	14.0129	13.9633	14.2297	14.2647	14.1958	14.4187
O43151	O43151	TET3_HUMAN	TET3	Methylcytosine dioxygenase TET3	Color2 [A=255, R=169, G=169, B=169]	1	4		13.5477	12.9733	12.74	12.9991	12.7836	12.8322	11.8625	12.3225	14.0164	13.3271	13.0353	12.1742
O43155	O43155	FLRT2_HUMAN	FLRT2	Leucine-rich repeat transmembrane protein FLRT2	Color2 [A=255, R=169, G=169, B=169]	1	4		9.58411	11.8707	10.4297	11.988	10.351	11.734	11.6107	10.0051	11.1894	9.72869	12.5527	13.2798
O43156	O43156	TTI1_HUMAN	TTI1	TELO2-interacting protein 1 homolog	Color2 [A=255, R=169, G=169, B=169]	1	4		13.9341	14.1628	14.7395	14.1667	13.7203	14.829	14.8479	14.7015	13.7942	14.4008	14.6586	14.702
O43157	O43157	PLXB1_HUMAN	PLXNB1	Plexin-B1	Color2 [A=255, R=169, G=169, B=169]	1	4		15.598	15.6045	15.6324	15.6072	15.6801	16.2063	15.7127	15.6005	16.2347	16.1397	16.2177	16.4122
O43159	O43159	RRP8_HUMAN	RRP8	Ribosomal RNA-processing protein 8	Color2 [A=255, R=169, G=169, B=169]	1	4		17.3064	17.6267	17.8633	17.8743	17.4926	17.8487	17.9974	17.8647	17.6265	18.1472	18.0844	18.2485
O43164	O43164	PJA2_HUMAN	PJA2	E3 ubiquitin-protein ligase Praja-2	Color2 [A=255, R=169, G=169, B=169]	1	4		11.9392	11.8738	9.29814	8.95439	11.2473	12.2066	12.3055	10.1425	12.8586	12.7188	12.349	13.1893
O43164;Q8NG27	O43164;Q8NG27	PJA1_HUMAN;PJA2_HUMAN	PJA1;PJA2	E3 ubiquitin-protein ligase Praja-2	Color2 [A=255, R=169, G=169, B=169]	1	4		10.7319	10.4775	10.719	11.314	13.25	13.4842	13.9804	13.3847	12.2396	12.8098	13.2559	12.251
O43166	O43166	SI1L1_HUMAN	SIPA1L1	Signal-induced proliferation-associated 1-like protein 1	Color2 [A=255, R=169, G=169, B=169]	1	4		15.766	16.3558	16.3645	16.4285	15.6969	16.1225	16.0128	15.81	15.4808	15.9029	15.5619	15.7857
O43166;O60292;Q9P2F8	O43166;O60292;Q9P2F8	SI1L1_HUMAN;SI1L2_HUMAN;SI1L3_HUMAN	SIPA1L1;SIPA1L2;SIPA1L3	Signal-induced proliferation-associated 1-like protein 1	Color2 [A=255, R=169, G=169, B=169]	1	4		11.1455	14.3209	10.8632	9.71207	13.7325	11.2074	11.9731	11.2572	10.0866	11.003	12.2127	11.7548
O43167	O43167	ZBT24_HUMAN	ZBTB24	Zinc finger and BTB domain-containing protein 24	Color2 [A=255, R=169, G=169, B=169]	1	4		13.6473	11.7084	12.7182	13.3471	13.2006	11.7188	13.4509	12.9024	12.8767	13.6245	14.0888	12.4017
O43169	O43169	CYB5B_HUMAN	CYB5B	Cytochrome b5 type B	Color2 [A=255, R=169, G=169, B=169]	1	4		14.7318	15.9926	14.7109	15.1652	15.471	14.5109	15.1759	16.0614	15.3267	14.984	15.2506	14.5021
O43172	O43172	PRP4_HUMAN	PRPF4	U4/U6 small nuclear ribonucleoprotein Prp4	Color2 [A=255, R=169, G=169, B=169]	1	4		18.072	18.1156	18.0555	18.0694	18.0953	17.8599	17.7134	17.7026	18.2203	17.9643	17.9507	17.5581
O43173	O43173	SIA8C_HUMAN	ST8SIA3	Sia-alpha-2,3-Gal-beta-1,4-GlcNAc-R:alpha 2,8-sialyltransferase	Color2 [A=255, R=169, G=169, B=169]	1	4		15.8608	16.3614	15.8674	16.1396	15.5735	15.6449	15.981	15.8655	16.3491	15.8064	16.005	15.7785
O43175	O43175	SERA_HUMAN	PHGDH	D-3-phosphoglycerate dehydrogenase	Color2 [A=255, R=169, G=169, B=169]	1	4		18.5967	18.9549	19.2652	19.227	19.2459	19.363	19.3469	19.4063	19.5065	20.1566	20.3009	20.7316
O43181	O43181	NDUS4_HUMAN	NDUFS4	NADH dehydrogenase [ubiquinone] iron-sulfur protein 4, mitochondrial	Color2 [A=255, R=169, G=169, B=169]	1	4		16.9982	17.2439	17.5219	17.3361	17.2521	17.0476	17.2348	17.1094	17.3218	16.657	16.3735	16.5429
O43187	O43187	IRAK2_HUMAN	IRAK2	Interleukin-1 receptor-associated kinase-like 2	Color2 [A=255, R=169, G=169, B=169]	1	4		15.4783	15.3331	14.4589	15.0611	15.4002	14.8988	14.6229	13.6277	15.1997	14.8762	14.5843	15.09
O43189	O43189	PHF1_HUMAN	PHF1	PHD finger protein 1	Color2 [A=255, R=169, G=169, B=169]	1	4		14.9566	20.7443	20.7893	20.5471	15.4352	21.5925	21.1296	20.9957	14.9156	20.4514	20.4806	19.9986
O43236	O43236	SEPT4_HUMAN	SEPTIN4	Septin-4	Color2 [A=255, R=169, G=169, B=169]	1	4		13.8655	13.9272	9.71468	14.5268	15.0736	14.7375	14.7741	14.5452	14.649	14.8248	14.5241	14.8604
O43237	O43237	DC1L2_HUMAN	DYNC1LI2	Cytoplasmic dynein 1 light intermediate chain 2	Color2 [A=255, R=169, G=169, B=169]	1	4		10.5072	10.6718	11.7048	13.7086	13.2711	13.7375	12.8804	13.3307	13.3763	13.8221	13.7838	14.1777
O43237;Q9Y6G9	O43237;Q9Y6G9	DC1L1_HUMAN;DC1L2_HUMAN	DYNC1LI1;DYNC1LI2	Cytoplasmic dynein 1 light intermediate chain 2	Color2 [A=255, R=169, G=169, B=169]	1	4		10.7597	11.4712	11.108	9.93506	11.6689	12.3813	13.1366	13.67	11.2055	12.9444	11.8091	13.06
O43242	O43242	PSMD3_HUMAN	PSMD3	26S proteasome non-ATPase regulatory subunit 3	Color2 [A=255, R=169, G=169, B=169]	1	4		16.7108	17.061	16.9652	16.7793	16.9465	16.8675	17.0418	17.2437	17.3353	17.3803	17.4856	17.3073
O43251	O43251	RFOX2_HUMAN	RBFOX2	RNA binding protein fox-1 homolog 2	Color2 [A=255, R=169, G=169, B=169]	1	4		17.2988	17.6616	17.3617	17.5767	17.2469	16.9931	17.2877	17.0763	17.1556	17.3476	17.3398	17.2509
O43252	O43252	PAPS1_HUMAN	PAPSS1	Bifunctional 3'-phosphoadenosine 5'-phosphosulfate synthase 1	Color2 [A=255, R=169, G=169, B=169]	1	4		17.8716	16.8669	17.6129	17.2311	17.5732	17.5117	17.0256	16.9867	17.3521	17.6461	17.5278	17.8862
O43255	O43255	SIAH2_HUMAN	SIAH2	E3 ubiquitin-protein ligase SIAH2	Color2 [A=255, R=169, G=169, B=169]	1	4		13.2763	11.6533	11.7092	10.3705	13.3231	11.5199	11.5501	10.7127	11.6646	11.8555	12.1274	11.5189
O43257	O43257	ZNHI1_HUMAN	ZNHIT1	Zinc finger HIT domain-containing protein 1	Color2 [A=255, R=169, G=169, B=169]	1	4		14.0805	13.9297	14.1249	13.9662	14.4523	14.5254	13.8687	14.2134	14.5832	14.3548	14.997	14.8637
O43264	O43264	ZW10_HUMAN	ZW10	Centromere/kinetochore protein zw10 homolog	Color2 [A=255, R=169, G=169, B=169]	1	4		17.1003	17.3488	17.3362	17.178	17.3835	17.5122	17.5794	17.4755	17.3665	17.5146	17.4685	17.3708
O43272	O43272	PROD_HUMAN	PRODH	Proline dehydrogenase 1, mitochondrial	Color2 [A=255, R=169, G=169, B=169]	1	4		12.8548	12.3537	11.4506	11.2749	15.8436	15.5908	15.6842	15.8586	15.4836	14.9012	14.9196	15.0163
O43286	O43286	B4GT5_HUMAN	B4GALT5	Beta-1,4-galactosyltransferase 5	Color2 [A=255, R=169, G=169, B=169]	1	4		13.8487	10.102	13.6279	14.4308	14.3073	14.6397	14.8415	15.2104	13.7966	14.5769	14.8679	14.0732
O43290	O43290	SNUT1_HUMAN	SART1	U4/U6.U5 tri-snRNP-associated protein 1	Color2 [A=255, R=169, G=169, B=169]	1	4		17.4839	17.9215	18.1487	18.0252	17.4159	17.8575	17.8248	17.6304	17.8056	18.1511	18.2517	18.1263
O43292	O43292	GPAA1_HUMAN	GPAA1	Glycosylphosphatidylinositol anchor attachment 1 protein	Color2 [A=255, R=169, G=169, B=169]	1	4		18.0614	18.2433	18.1584	17.999	18.0054	18.0058	18.3805	18.2596	18.0806	17.9149	17.9119	17.4467
O43293	O43293	DAPK3_HUMAN	DAPK3	Death-associated protein kinase 3	Color2 [A=255, R=169, G=169, B=169]	1	4		13.7879	13.4419	12.7754	13.569	14.2882	14.6672	14.2188	14.235	13.9855	14.7934	14.3966	14.5625
O43296	O43296	ZN264_HUMAN	ZNF264	Zinc finger protein 264	Color2 [A=255, R=169, G=169, B=169]	1	4		11.2735	11.0703	12.1164	11.509	12.721	10.4435	10.8625	12.3505	11.4871	10.0107	11.3865	11.3436
O43296;Q14592	O43296;Q14592;Q08ER8	ZN264_HUMAN;ZN460_HUMAN	ZNF264;ZNF460	Zinc finger protein 264	Color2 [A=255, R=169, G=169, B=169]	1	4		12.2292	13.8122	14.2876	14.1308	14.2942	14.9883	14.5562	13.9894	13.326	13.5383	14.4385	13.6605
O43298	O43298	ZBT43_HUMAN	ZBTB43	Zinc finger and BTB domain-containing protein 43	Color2 [A=255, R=169, G=169, B=169]	1	4		13.6594	14.2048	14.0733	13.7187	13.9403	14.5619	14.4924	14.2929	13.9115	14.5984	14.0934	14.4092
O43299	O43299	AP5Z1_HUMAN	AP5Z1	AP-5 complex subunit zeta-1	Color2 [A=255, R=169, G=169, B=169]	1	4		11.2288	12.7553	12.1837	12.3801	12.5528	10.8582	12.9575	11.9748	13.018	13.6953	13.6947	13.1458
O43301	O43301	HS12A_HUMAN	HSPA12A	Heat shock 70 kDa protein 12A	Color2 [A=255, R=169, G=169, B=169]	1	4		15.7989	16.275	16.3695	16.2348	16.6422	17.4013	17.3106	17.1956	16.9654	17.2304	17.7434	17.8018
O43301;Q96MM6	O43301;Q96MM6	HS12A_HUMAN;HS12B_HUMAN	HSPA12A;HSPA12B	Heat shock 70 kDa protein 12A	Color2 [A=255, R=169, G=169, B=169]	1	4		10.7432	10.438	12.2563	11.9056	13.498	13.3901	13.8443	12.3924	12.7847	13.9955	14.4786	14.213
O43303	O43303	CP110_HUMAN	CCP110	Centriolar coiled-coil protein of 110 kDa	Color2 [A=255, R=169, G=169, B=169]	1	4		14.0743	14.3125	14.1852	14.5816	14.4441	14.541	14.7033	14.3693	13.2018	14.8976	14.7603	14.8541
O43306	O43306	ADCY6_HUMAN	ADCY6	Adenylate cyclase type 6	Color2 [A=255, R=169, G=169, B=169]	1	4		14.5866	14.7317	14.5837	14.6691	15.1603	14.8235	14.7729	15.0773	14.817	14.9865	14.89	14.4086
O43309;Q5T0B9;Q8TF68	O43309;Q8TF68;Q5T0B9	ZN362_HUMAN;ZN384_HUMAN;ZSC12_HUMAN	ZNF362;ZNF384;ZSCAN12	Zinc finger and SCAN domain-containing protein 12	Color2 [A=255, R=169, G=169, B=169]	1	4		11.3733	13.2178	11.5408	11.5749	10.3107	13.4336	11.9636	13.322	10.057	13.1472	12.0662	11.711
O43310	O43310	CTIF_HUMAN	CTIF	CBP80/20-dependent translation initiation factor	Color2 [A=255, R=169, G=169, B=169]	1	4		11.082	13.5438	10.3341	8.40085	13.309	12.6243	12.3311	13.1636	12.0481	13.5141	13.7936	14.5315
O43314	O43314	VIP2_HUMAN	PPIP5K2	Inositol hexakisphosphate and diphosphoinositol-pentakisphosphate kinase 2	Color2 [A=255, R=169, G=169, B=169]	1	4		13.9621	14.6017	13.635	15.023	14.9904	15.2928	15.3095	14.7002	13.4064	14.8531	15.2568	15.4538
O43324	O43324	MCA3_HUMAN	EEF1E1	Eukaryotic translation elongation factor 1 epsilon-1	Color2 [A=255, R=169, G=169, B=169]	1	4		16.1297	16.6412	16.7485	16.6834	16.9519	17.4269	17.0304	17.3714	17.2904	17.508	17.5742	17.7276
O43325	O43325	LYRM1_HUMAN	LYRM1	LYR motif-containing protein 1	Color2 [A=255, R=169, G=169, B=169]	1	4		15.9953	15.895	15.2833	16.5407	15.7519	15.6932	15.7437	16.0177	15.7314	15.9394	15.9674	15.9455
O43347	O43347	MSI1H_HUMAN	MSI1	RNA-binding protein Musashi homolog 1	Color2 [A=255, R=169, G=169, B=169]	1	4		11.9497	12.8179	12.4322	14.4394	14.8667	13.3952	13.7508	13.8556	14.1946	15.3514	15.0222	15.0619
O43347;Q96DH6	Q96DH6;O43347	MSI1H_HUMAN;MSI2H_HUMAN	MSI1;MSI2	RNA-binding protein Musashi homolog 1	Color2 [A=255, R=169, G=169, B=169]	1	4		13.3973	14.1802	14.6689	13.7588	14	13.9063	13.922	14.3125	14.5836	15.0604	14.9578	13.8327
O43374	O43374;C9J798	RASL2_HUMAN	RASA4	Ras GTPase-activating protein 4	Color2 [A=255, R=169, G=169, B=169]	1	4		10.6342	14.2905	14.2083	14.3277	14.5551	14.2703	14.3253	14.2203	13.8581	14.8793	15.1391	15.4957
O43379	O43379	WDR62_HUMAN	WDR62	WD repeat-containing protein 62	Color2 [A=255, R=169, G=169, B=169]	1	4		16.895	16.8145	17.2206	16.8516	16.9786	16.8097	17.1248	17.1058	17.1659	17.7607	17.3553	17.656
O43390	O43390	HNRPR_HUMAN	HNRNPR	Heterogeneous nuclear ribonucleoprotein R	Color2 [A=255, R=169, G=169, B=169]	1	4		21.5893	21.7478	21.642	21.9125	21.2518	20.8126	21.2307	20.9873	21.1779	21.5481	21.4768	21.3462
O43390;O60506	O43390;O60506	HNRPQ_HUMAN;HNRPR_HUMAN	HNRNPR;SYNCRIP	Heterogeneous nuclear ribonucleoprotein R	Color2 [A=255, R=169, G=169, B=169]	1	4		22.1234	22.2788	22.058	22.3704	21.8793	21.4722	21.8261	21.5925	21.7956	22.1665	21.9609	21.7556
O43395	O43395	PRPF3_HUMAN	PRPF3	U4/U6 small nuclear ribonucleoprotein Prp3	Color2 [A=255, R=169, G=169, B=169]	1	4		16.8428	17.0449	16.894	16.8147	16.5275	16.7829	17.0114	16.3455	16.7831	17.0157	16.975	16.6479
O43396	O43396	TXNL1_HUMAN	TXNL1	Thioredoxin-like protein 1	Color2 [A=255, R=169, G=169, B=169]	1	4		16.9992	17.9509	17.3636	16.7328	17.5932	17.8844	17.4279	17.7718	17.5076	18.5775	19.1343	19.1102
O43399	O43399	TPD54_HUMAN	TPD52L2	Tumor protein D54	Color2 [A=255, R=169, G=169, B=169]	1	4		11.1995	13.015	12.428	13.4667	12.6391	13.4101	12.1728	13.0828	13.3952	14.6737	14.3054	14.3159
O43402	O43402	EMC8_HUMAN	EMC8	ER membrane protein complex subunit 8	Color2 [A=255, R=169, G=169, B=169]	1	4		20.4835	20.4412	20.2473	20.642	20.8126	20.377	20.3864	20.4894	20.7383	20.3081	20.3271	20.1887
O43405	O43405	COCH_HUMAN	COCH	Cochlin	Color2 [A=255, R=169, G=169, B=169]	1	4		12.3173	12.7477	12.6602	11.9732	12.7906	12.2152	13.1427	13.2351	11.9547	13.0414	12.4563	13.3638
O43414	O43414	ERI3_HUMAN	ERI3	ERI1 exoribonuclease 3	Color2 [A=255, R=169, G=169, B=169]	1	4		15.9275	15.703	15.7953	16.1701	15.8853	15.9042	15.7896	16.2583	14.9919	16.5344	16.3553	16.1778
O43422	O43422	P52K_HUMAN	THAP12	52 kDa repressor of the inhibitor of the protein kinase	Color2 [A=255, R=169, G=169, B=169]	1	4		14.5819	13.8596	14.4275	14.0994	13.4083	14.4717	14.5301	14.0302	14.4796	14.7609	14.6255	14.759
O43424	O43424	GRID2_HUMAN	GRID2	Glutamate receptor ionotropic, delta-2	Color2 [A=255, R=169, G=169, B=169]	1	4		11.2589	11.4057	11.982	11.0771	10.8004	10.7589	10.1754	13.0711	8.82865	10.978	12.8586	11.9007
O43424;Q9ULK0	O43424;Q9ULK0	GRID1_HUMAN;GRID2_HUMAN	GRID1;GRID2	Glutamate receptor ionotropic, delta-2	Color2 [A=255, R=169, G=169, B=169]	1	4		14.2976	14.5998	11.7822	14.1425	13.9058	14.4306	14.8112	13.826	14.1434	15.1502	14.7956	14.2945
O43427	O43427	FIBP_HUMAN	FIBP	Acidic fibroblast growth factor intracellular-binding protein	Color2 [A=255, R=169, G=169, B=169]	1	4		16.2292	16.5024	16.3511	16.262	16.184	16.2185	16.1801	16.2222	16.2545	16.5616	16.2783	16.361
O43432	O43432	IF4G3_HUMAN	EIF4G3	Eukaryotic translation initiation factor 4 gamma 3	Color2 [A=255, R=169, G=169, B=169]	1	4		13.3627	13.0883	12.7155	13.5495	13.0838	13.1842	13.3617	12.9229	13.7143	13.6156	14.1542	14.0347
O43432;Q04637	O43432;Q04637	IF4G1_HUMAN;IF4G3_HUMAN	EIF4G1;EIF4G3	Eukaryotic translation initiation factor 4 gamma 3	Color2 [A=255, R=169, G=169, B=169]	1	4		15.4192	15.3105	15.8994	15.8605	15.5829	15.764	15.6668	15.0688	15.2672	16.2368	16.3359	16.8798
O43435	O43435	TBX1_HUMAN	TBX1	T-box transcription factor TBX1	Color2 [A=255, R=169, G=169, B=169]	1	4		13.8155	13.1012	13.0519	13.5425	13.5479	14.1382	14.1082	13.5648	13.0647	14.6634	13.2229	14.1087
O43439	O43439	MTG8R_HUMAN	CBFA2T2	Protein CBFA2T2	Color2 [A=255, R=169, G=169, B=169]	1	4		14.2044	15.0889	14.4493	14.8056	13.664	14.6219	14.3304	14.0365	13.2016	14.5571	14.7871	14.9643
O43439;O75081;Q06455	O43439;O75081;Q06455	MTG16_HUMAN;MTG8R_HUMAN;MTG8_HUMAN	CBFA2T2;CBFA2T3;RUNX1T1	Protein CBFA2T2	Color2 [A=255, R=169, G=169, B=169]	1	4		13.2856	14.5121	14.4554	15.4237	14.2463	14.6232	14.4527	14.3385	13.0505	14.2395	14.7259	15.6735
O43439;Q06455	O43439;Q06455	MTG8R_HUMAN;MTG8_HUMAN	CBFA2T2;RUNX1T1	Protein CBFA2T2	Color2 [A=255, R=169, G=169, B=169]	1	4		9.87293	13.6768	14.3362	13.6977	12.6354	13.97	13.4412	12.0875	10.9424	12.5837	12.4881	12.4585
O43447	O43447	PPIH_HUMAN	PPIH	Peptidyl-prolyl cis-trans isomerase H	Color2 [A=255, R=169, G=169, B=169]	1	4		16.8685	16.5931	16.7333	16.8705	17.1367	16.5613	16.5981	16.6916	16.991	17.2853	17.2872	17.2551
O43462	O43462	MBTP2_HUMAN	MBTPS2	Membrane-bound transcription factor site-2 protease	Color2 [A=255, R=169, G=169, B=169]	1	4		15.4394	16.2186	15.7931	15.5296	15.7641	15.3522	15.9646	15.867	15.6691	15.5568	15.5951	15.6587
O43463	O43463	SUV91_HUMAN	SUV39H1	Histone-lysine N-methyltransferase SUV39H1	Color2 [A=255, R=169, G=169, B=169]	1	4		16.9177	17.7684	17.7947	17.7809	17.4958	18.2549	17.8986	17.9606	17.0628	17.8657	17.8248	17.6782
O43464	O43464	HTRA2_HUMAN	HTRA2	Serine protease HTRA2, mitochondrial	Color2 [A=255, R=169, G=169, B=169]	1	4		15.7909	15.1047	15.3215	15.8514	15.8024	15.5082	16.3459	15.826	15.622	15.9837	15.7156	15.5457
O43474	O43474	KLF4_HUMAN	KLF4	Krueppel-like factor 4	Color2 [A=255, R=169, G=169, B=169]	1	4		10.5198	11.9764	13.4016	12.3523	12.5868	13.153	12.5508	12.7182	12.6585	13.0412	13.361	13.0449
O43482	O43482	MS18B_HUMAN	OIP5	Protein Mis18-beta	Color2 [A=255, R=169, G=169, B=169]	1	4		14.0505	15.4003	14.9253	15.225	14.2118	15.0131	14.8617	15.1031	13.9729	14.6966	15.2325	14.9909
O43488	O43488	ARK72_HUMAN	AKR7A2	Aflatoxin B1 aldehyde reductase member 2	Color2 [A=255, R=169, G=169, B=169]	1	4		18.2381	18.1076	18.0817	18.2308	18.2438	17.9351	18.1231	18.1073	18.1274	17.9828	17.9529	17.8447
O43491	O43491	E41L2_HUMAN	EPB41L2	Band 4.1-like protein 2	Color2 [A=255, R=169, G=169, B=169]	1	4		16.5861	17.014	16.3703	16.826	17.5126	17.7885	17.7336	17.6799	17.3642	18.0137	18.0024	17.8691
O43491;Q9H4G0;Q9Y2J2	O43491;Q9H4G0;Q9Y2J2	E41L1_HUMAN;E41L2_HUMAN;E41L3_HUMAN	EPB41L1;EPB41L2;EPB41L3	Band 4.1-like protein 2	Color2 [A=255, R=169, G=169, B=169]	1	4		10.8162	14.7468	14.0577	13.9247	15.6874	15.6678	15.7708	16.3803	14.7088	16.519	15.9045	14.7895
O43491;Q9Y2J2	O43491;Q9Y2J2	E41L2_HUMAN;E41L3_HUMAN	EPB41L2;EPB41L3	Band 4.1-like protein 2	Color2 [A=255, R=169, G=169, B=169]	1	4		18.6372	18.9273	18.7443	19.3787	20.1376	19.8551	19.6419	20.2815	19.8806	20.2644	20.3689	20.0721
O43493	O43493	TGON2_HUMAN	TGOLN2	Trans-Golgi network integral membrane protein 2	Color2 [A=255, R=169, G=169, B=169]	1	4		12.2507	12.4286	10.9104	11.5307	10.6926	11.7209	10.1102	12.4473	9.77252	10.2549	11.9964	11.7062
O43502	O43502	RA51C_HUMAN	RAD51C	DNA repair protein RAD51 homolog 3	Color2 [A=255, R=169, G=169, B=169]	1	4		13.724	13.3886	15.3241	14.9281	15.1337	15.0752	15.3128	14.9689	14.6543	15.4809	15.4683	15.0654
O43504	O43504	LTOR5_HUMAN	LAMTOR5	Ragulator complex protein LAMTOR5	Color2 [A=255, R=169, G=169, B=169]	1	4		18.9952	18.8792	19.1119	19.02	19.612	20.0457	18.9785	19.9066	19.8474	19.5372	18.531	19.0437
O43505	O43505	B4GA1_HUMAN	B4GAT1	Beta-1,4-glucuronyltransferase 1	Color2 [A=255, R=169, G=169, B=169]	1	4		18.7132	18.7643	18.4109	18.6306	18.4637	17.9258	18.2943	18.3598	18.0024	18.3439	18.3803	18.155
O43513	O43513	MED7_HUMAN	MED7	Mediator of RNA polymerase II transcription subunit 7	Color2 [A=255, R=169, G=169, B=169]	1	4		12.9638	10.974	11.3125	11.8878	9.90619	12.5991	11.6936	11.7487	10.7299	11.69	12.2895	11.719
O43521	O43521	B2L11_HUMAN	BCL2L11	Bcl-2-like protein 11	Color2 [A=255, R=169, G=169, B=169]	1	4		15.6629	15.2498	15.5653	15.2154	14.2868	14.6433	13.895	14.088	15.1001	14.5418	15.5618	15.0858
O43526	O43526	KCNQ2_HUMAN	KCNQ2	Potassium voltage-gated channel subfamily KQT member 2	Color2 [A=255, R=169, G=169, B=169]	1	4		13.6873	12.8134	11.4649	13.5569	12.6609	13.3709	13.4893	12.9049	13.8558	13.7554	13.0906	13.0782
O43529	O43529	CHSTA_HUMAN	CHST10	Carbohydrate sulfotransferase 10	Color2 [A=255, R=169, G=169, B=169]	1	4		15.1275	14.061	12.543	13.9251	14.1245	12.756	14.3428	14.3282	14.2712	14.1193	14.3681	13.3219
O43542	O43542	XRCC3_HUMAN	XRCC3	DNA repair protein XRCC3	Color2 [A=255, R=169, G=169, B=169]	1	4		14.7366	15.5245	14.7768	14.5957	15.1217	15.0279	14.8689	14.8476	14.3582	14.6625	15.0935	15.1131
O43548	O43548	TGM5_HUMAN	TGM5	Protein-glutamine gamma-glutamyltransferase 5	Color2 [A=255, R=169, G=169, B=169]	1	4		15.3591	15.6143	15.882	18.2831	15.1225	14.279	14.8438	14.1281	15.2475	14.3114	15.0424	14.8086
O43556	O43556	SGCE_HUMAN	SGCE	Epsilon-sarcoglycan	Color2 [A=255, R=169, G=169, B=169]	1	4		12.8685	13.311	14.0282	14.0315	13.4632	13.4792	13.775	13.8642	13.5678	12.9778	11.9109	12.1164
O43581	O43581	SYT7_HUMAN	SYT7	Synaptotagmin-7	Color2 [A=255, R=169, G=169, B=169]	1	4		16.0627	16.401	16.2576	16.1933	16.0905	15.8496	15.821	15.978	15.1501	15.2704	15.5476	15.5302
O43583	O43583	DENR_HUMAN	DENR	Density-regulated protein	Color2 [A=255, R=169, G=169, B=169]	1	4		12.3213	12.4647	13.6328	14.2293	9.76944	14.5129	14.2069	14.1226	14.752	14.5357	15.2803	14.5415
O43592	O43592	XPOT_HUMAN	XPOT	Exportin-T	Color2 [A=255, R=169, G=169, B=169]	1	4		12.944	13.0503	12.6787	13.0929	12.7801	13.5823	14.1884	13.6421	13.7338	14.2509	13.3098	13.461
O43598	O43598	DNPH1_HUMAN	DNPH1	2'-deoxynucleoside 5'-phosphate N-hydrolase 1	Color2 [A=255, R=169, G=169, B=169]	1	4		13.6067	13.2136	13.625	14.1921	13.3308	13.6507	13.8443	12.4246	13.9427	11.3115	12.9885	13.5858
O43602	O43602	DCX_HUMAN	DCX	Neuronal migration protein doublecortin	Color2 [A=255, R=169, G=169, B=169]	1	4		10.8427	11.2578	12.2508	11.6744	12.1638	11.7127	13.1666	12.0563	12.4544	13.5242	13.5013	14.1679
O43602;Q8N568	O43602;Q8N568	DCLK2_HUMAN;DCX_HUMAN	DCLK2;DCX	Neuronal migration protein doublecortin	Color2 [A=255, R=169, G=169, B=169]	1	4		12.1112	11.2824	10.1676	10.6564	11.7489	11.0672	12.2796	12.29	11.9989	11.3331	14.047	14.2607
O43615	O43615	TIM44_HUMAN	TIMM44	Mitochondrial import inner membrane translocase subunit TIM44	Color2 [A=255, R=169, G=169, B=169]	1	4		20.3933	20.0737	20.0753	20.2174	20.0999	19.8702	20.0877	19.9625	20.2272	20.0124	19.8349	19.7577
O43617	O43617	TPPC3_HUMAN	TRAPPC3	Trafficking protein particle complex subunit 3	Color2 [A=255, R=169, G=169, B=169]	1	4		14.9822	15.2424	15.9005	15.7433	15.764	16.1595	15.5296	15.4048	15.6903	15.2869	16.2189	15.9121
O43623	O43623	SNAI2_HUMAN	SNAI2	Zinc finger protein SNAI2	Color2 [A=255, R=169, G=169, B=169]	1	4		11.845	12.1197	11.1396	12.0814	11.0939	10.6743	11.4052	12.5107	10.9367	11.4772	11.7393	11.7982
O43633	O43633	CHM2A_HUMAN	CHMP2A	Charged multivesicular body protein 2a	Color2 [A=255, R=169, G=169, B=169]	1	4		12.079	10.3054	10.5916	12.1942	10.5014	12.6728	12.6571	10.5341	12.8054	10.883	12.6178	13.1078
O43639	O43639	NCK2_HUMAN	NCK2	Cytoplasmic protein NCK2	Color2 [A=255, R=169, G=169, B=169]	1	4		9.2962	10.5004	11.3152	10.5374	10.8999	12.5829	10.6667	10.5365	11.3098	10.0869	11.4748	12.7844
O43660	O43660	PLRG1_HUMAN	PLRG1	Pleiotropic regulator 1	Color2 [A=255, R=169, G=169, B=169]	1	4		18.597	18.83	18.6466	18.612	18.7704	18.7126	18.619	18.6061	18.6632	18.6651	18.6483	18.2183
O43663	O43663	PRC1_HUMAN	PRC1	Protein regulator of cytokinesis 1	Color2 [A=255, R=169, G=169, B=169]	1	4		16.6286	17.3223	17.4464	17.4111	17.8235	18.4011	18.1259	18.0409	17.3811	18.2564	18.1747	18.0465
O43670	O43670	ZN207_HUMAN	ZNF207	BUB3-interacting and GLEBS motif-containing protein ZNF207	Color2 [A=255, R=169, G=169, B=169]	1	4		17.3327	17.0048	17.4163	17.2376	17.5766	17.4183	16.9255	17.5823	17.9183	17.9342	17.7935	17.7001
O43674	O43674	NDUB5_HUMAN	NDUFB5	NADH dehydrogenase [ubiquinone] 1 beta subcomplex subunit 5, mitochondrial	Color2 [A=255, R=169, G=169, B=169]	1	4		17.9822	17.706	17.9443	17.353	17.7591	17.5399	17.7201	18.014	17.7392	17.6256	17.2155	16.5712
O43676	O43676	NDUB3_HUMAN	NDUFB3	NADH dehydrogenase [ubiquinone] 1 beta subcomplex subunit 3	Color2 [A=255, R=169, G=169, B=169]	1	4		17.7421	16.8166	17.4474	17.4366	17.4091	17.5808	17.7085	17.7401	17.4619	17.1784	17.0052	17.1452
O43678	O43678	NDUA2_HUMAN	NDUFA2	NADH dehydrogenase [ubiquinone] 1 alpha subcomplex subunit 2	Color2 [A=255, R=169, G=169, B=169]	1	4		21.0518	20.4148	20.7308	20.6788	20.6254	20.3633	20.475	20.3638	20.6619	20.0918	19.9157	19.9319
O43679	O43679	LDB2_HUMAN	LDB2	LIM domain-binding protein 2	Color2 [A=255, R=169, G=169, B=169]	1	4		9.92309	11.5421	12.3037	10.9908	11.5218	12.2559	11.0392	13.2788	11.5529	13.3411	12.8896	13.0017
O43679;Q86U70	O43679;Q86U70	LDB1_HUMAN;LDB2_HUMAN	LDB1;LDB2	LIM domain-binding protein 2	Color2 [A=255, R=169, G=169, B=169]	1	4		14.7471	16.2405	15.2736	15.9957	16.4754	16.3638	16.4064	16.0782	14.9007	15.9676	16.4826	15.5361
O43681	O43681	GET3_HUMAN	GET3	ATPase GET3	Color2 [A=255, R=169, G=169, B=169]	1	4		16.6278	16.9601	16.6092	17.2094	17.2913	16.8907	17.1585	17.1488	16.9228	17.5265	17.5107	17.6439
O43683	O43683	BUB1_HUMAN	BUB1	Mitotic checkpoint serine/threonine-protein kinase BUB1	Color2 [A=255, R=169, G=169, B=169]	1	4		10.1335	11.3354	11.5051	10.9227	10.8082	11.3183	9.895	11.1387	10.2439	9.71751	11.4539	11.1458
O43684	O43684	BUB3_HUMAN	BUB3	Mitotic checkpoint protein BUB3	Color2 [A=255, R=169, G=169, B=169]	1	4		18.2477	17.9802	18.1797	18.2799	18.4437	17.9818	18.0609	18.2156	18.4037	18.5186	18.6682	18.6082
O43692	O43692	PI15_HUMAN	PI15	Peptidase inhibitor 15	Color2 [A=255, R=169, G=169, B=169]	1	4		14.8315	16.4811	16.5233	15.9636	15.1147	16.532	16.2086	15.7721	14.5852	16.1455	16.2579	15.5809
O43707	O43707	ACTN4_HUMAN	ACTN4	Alpha-actinin-4	Color2 [A=255, R=169, G=169, B=169]	1	4		14.2167	15.3092	15.3501	15.4501	15.7121	15.2749	15.4385	15.1261	15.9809	15.1666	15.5723	15.8783
O43707;P12814	O43707;P12814	ACTN1_HUMAN;ACTN4_HUMAN	ACTN1;ACTN4	Alpha-actinin-4	Color2 [A=255, R=169, G=169, B=169]	1	4		13.8627	13.908	14.4484	14.5116	14.2469	13.7132	14.3257	14.6297	14.4974	13.8627	14.5628	14.1183
O43707;P12814;P35609	O43707;P12814;P35609;Q08043	ACTN1_HUMAN;ACTN2_HUMAN;ACTN4_HUMAN	ACTN1;ACTN2;ACTN4	Alpha-actinin-4	Color2 [A=255, R=169, G=169, B=169]	1	4		13.9518	14.3899	12.7134	13.7824	12.9732	13.3141	14.0809	13.6519	13.541	12.8784	14.2179	12.6503
O43707;Q9H254	O43707;Q9H254	ACTN4_HUMAN;SPTN4_HUMAN	ACTN4;SPTBN4	Alpha-actinin-4	Color2 [A=255, R=169, G=169, B=169]	1	4		11.0373	12.8916	12.8131	12.1264	12.9541	12.0755	13.0031	11.6092	13.1803	12.7661	12.7488	11.8906
O43708	O43708	MAAI_HUMAN	GSTZ1	Maleylacetoacetate isomerase	Color2 [A=255, R=169, G=169, B=169]	1	4		19.8739	19.5193	19.6354	19.8834	19.3224	19.0281	19.2165	19.3222	19.7363	19.2676	19.1877	19.05
O43709	O43709	BUD23_HUMAN	BUD23	Probable 18S rRNA (guanine-N(7))-methyltransferase	Color2 [A=255, R=169, G=169, B=169]	1	4		16.8084	17.0687	17.2425	16.8561	16.122	16.4912	15.9557	16.0441	16.218	16.6915	15.8154	16.0917
O43716	O43716	GATC_HUMAN	GATC	Glutamyl-tRNA(Gln) amidotransferase subunit C, mitochondrial	Color2 [A=255, R=169, G=169, B=169]	1	4		17.9412	17.1841	17.7117	17.6009	17.7805	17.6922	17.5154	17.4754	18.0933	18.0453	17.9675	18.0231
O43719	O43719	HTSF1_HUMAN	HTATSF1	HIV Tat-specific factor 1	Color2 [A=255, R=169, G=169, B=169]	1	4		15.4696	15.6918	15.3222	15.6114	15.6367	15.7267	15.861	15.7806	15.5924	16.0039	15.922	15.5884
O43736	O43736	ITM2A_HUMAN	ITM2A	Integral membrane protein 2A	Color2 [A=255, R=169, G=169, B=169]	1	4		14.9279	14.5631	11.458	12.8641	14.5286	11.3428	13.7255	9.98551	13.0495	12.542	13.2393	13.975
O43739	O43739	CYH3_HUMAN	CYTH3	Cytohesin-3	Color2 [A=255, R=169, G=169, B=169]	1	4		13.4223	12.7622	10.0914	13.0484	13.3788	13.4798	14.3111	14.2382	10.4955	13.2142	12.9753	13.5829
O43739;Q15438;Q99418	O43739;Q15438;Q99418	CYH1_HUMAN;CYH2_HUMAN;CYH3_HUMAN	CYTH1;CYTH2;CYTH3	Cytohesin-3	Color2 [A=255, R=169, G=169, B=169]	1	4		15.302	15.8523	15.9823	15.811	16.6195	16.6892	16.4444	16.5869	16.0965	17.4434	17.2579	17.205
O43741	O43741	AAKB2_HUMAN	PRKAB2	5'-AMP-activated protein kinase subunit beta-2	Color2 [A=255, R=169, G=169, B=169]	1	4		14.6112	14.2201	14.0623	14.9735	15.2166	14.6033	15.2314	15.0055	15.2919	15.385	15.1537	15.4404
O43741;Q9Y478	O43741;Q9Y478	AAKB1_HUMAN;AAKB2_HUMAN	PRKAB1;PRKAB2	5'-AMP-activated protein kinase subunit beta-2	Color2 [A=255, R=169, G=169, B=169]	1	4		12.2536	12.772	13.14	11.6606	12.2177	13.4159	12.7282	12.3384	13.4959	13.7906	13.3248	12.9363
O43747	O43747	AP1G1_HUMAN	AP1G1	AP-1 complex subunit gamma-1	Color2 [A=255, R=169, G=169, B=169]	1	4		14.6545	15.18	15.2846	15.1912	15.2507	15.3863	15.6077	15.1642	15.26	15.2424	15.2931	15.3735
O43752	O43752	STX6_HUMAN	STX6	Syntaxin-6	Color2 [A=255, R=169, G=169, B=169]	1	4		12.0763	13.3468	14.384	13.3404	13.4346	13.0768	13.0106	11.9153	15.8498	13.1477	13.3846	13.3542
O43759	O43759	SNG1_HUMAN	SYNGR1	Synaptogyrin-1	Color2 [A=255, R=169, G=169, B=169]	1	4		16.4437	16.8038	16.6672	16.3993	16.3113	13.827	16.086	15.6329	15.5353	15.9516	16.116	16.4192
O43760	O43760	SNG2_HUMAN	SYNGR2	Synaptogyrin-2	Color2 [A=255, R=169, G=169, B=169]	1	4		16.1462	16.3808	14.589	16.329	15.2188	15.3154	15.6044	16.3051	15.8966	15.9499	14.7758	15.7574
O43761	O43761	SNG3_HUMAN	SYNGR3	Synaptogyrin-3	Color2 [A=255, R=169, G=169, B=169]	1	4		13.9741	13.6418	11.1565	11.4426	14.3911	14.5571	15.3101	14.6097	15.1431	14.624	14.3475	14.8043
O43765	O43765	SGTA_HUMAN	SGTA	Small glutamine-rich tetratricopeptide repeat-containing protein alpha	Color2 [A=255, R=169, G=169, B=169]	1	4		13.4491	12.9709	13.7677	12.5335	14.0694	13.6425	12.9373	13.4705	13.5423	13.54	14.3717	14.815
O43766	O43766	LIAS_HUMAN	LIAS	Lipoyl synthase, mitochondrial	Color2 [A=255, R=169, G=169, B=169]	1	4		18.3062	18.0306	18.2137	18.0354	18.2821	17.8887	17.8718	17.8404	18.1616	17.6985	17.5082	17.7756
O43772	O43772	MCAT_HUMAN	SLC25A20	Mitochondrial carnitine/acylcarnitine carrier protein	Color2 [A=255, R=169, G=169, B=169]	1	4		19.9407	20.0962	20.156	20.1263	20.0528	20.0446	20.1379	20.0021	20.207	19.9085	19.8494	19.4827
O43776	O43776	SYNC_HUMAN	NARS1	Asparagine--tRNA ligase, cytoplasmic	Color2 [A=255, R=169, G=169, B=169]	1	4		13.161	13.5665	14.0954	14.1836	13.5498	14.1764	14.1679	14.3443	13.7885	15.1621	15.4065	15.7924
O43790	O43790	KRT86_HUMAN	KRT86	Keratin, type II cuticular Hb6	Color2 [A=255, R=169, G=169, B=169]	1	4		12.0401	10.1049	13.9135	15.952	12.3776	13.7048	14.317	12.0439	14.6542	11.0946	11.5349	12.0773
O43790;O95678;P02538;P04259;P05787;P08670;P12035;P13647;P48668;P78386;Q01546;Q14533;Q5XKE5;Q8N1N4;Q9NSB2	O43790;O95678;P02538;P04259;P05787;P08670;P08729;P12035;P13647;P14136;P48668;P78385;P78386;Q01546;Q14533;Q5XKE5;Q8N1N4;Q9NSB2	K22O_HUMAN;K2C3_HUMAN;K2C5_HUMAN;K2C6A_HUMAN;K2C6B_HUMAN;K2C6C_HUMAN;K2C75_HUMAN;K2C78_HUMAN;K2C79_HUMAN;K2C8_HUMAN;KRT81_HUMAN;KRT84_HUMAN;KRT85_HUMAN;KRT86_HUMAN;VIME_HUMAN	KRT3;KRT5;KRT6A;KRT6B;KRT6C;KRT75;KRT76;KRT78;KRT79;KRT8;KRT81;KRT84;KRT85;KRT86;VIM	Keratin, type II cuticular Hb6	Color2 [A=255, R=169, G=169, B=169]	1	4		24.5036	24.235	24.2829	24.6214	23.9356	23.745	23.828	23.5477	23.9173	23.5063	23.2255	22.8051
O43790;P78386	O43790;P78385;P78386;A6NCN2	KRT85_HUMAN;KRT86_HUMAN	KRT85;KRT86	Keratin, type II cuticular Hb6	Color2 [A=255, R=169, G=169, B=169]	1	4		10.7671	13.6614	18.3939	15.9042	15.3132	15.1224	10.3967	10.9171	9.39891	11.4792	13.8016	11.2269
O43790;P78386;Q14533	O43790;P78385;P78386;Q14533;A6NCN2	KRT81_HUMAN;KRT85_HUMAN;KRT86_HUMAN	KRT81;KRT85;KRT86	Keratin, type II cuticular Hb6	Color2 [A=255, R=169, G=169, B=169]	1	4		13.9921	15.2476	17.9283	17.159	15.9863	16.36	12.8573	14.2538	13.984	11.8644	14.6659	9.91498
O43790;P78386;Q14533;Q9NSB2;Q9NSB4	O43790;P78385;P78386;Q14533;Q9NSB2;Q9NSB4	KRT81_HUMAN;KRT82_HUMAN;KRT84_HUMAN;KRT85_HUMAN;KRT86_HUMAN	KRT81;KRT82;KRT84;KRT85;KRT86	Keratin, type II cuticular Hb6	Color2 [A=255, R=169, G=169, B=169]	1	4		15.1711	13.3297	15.7679	15.1605	15.0834	11.2854	10.4279	12.6353	14.4113	12.241	13.3753	10.2912
O43790;P78386;Q14533;Q9NSB4	O43790;P78385;P78386;Q14533;Q9NSB4;A6NCN2	KRT81_HUMAN;KRT82_HUMAN;KRT85_HUMAN;KRT86_HUMAN	KRT81;KRT82;KRT85;KRT86	Keratin, type II cuticular Hb6	Color2 [A=255, R=169, G=169, B=169]	1	4		10.7187	10.3617	15.0313	13.5026	13.7684	12.9001	11.4834	12.6149	9.8524	10.0932	12.226	10.0074
O43790;P78386;Q9NSB4	O43790;P78385;P78386;Q14533;Q9NSB4	KRT82_HUMAN;KRT85_HUMAN;KRT86_HUMAN	KRT82;KRT85;KRT86	Keratin, type II cuticular Hb6	Color2 [A=255, R=169, G=169, B=169]	1	4		14.6606	11.7468	15.1849	10.0643	15.2303	13.993	9.32951	11.403	15.542	10.8732	11.4031	11.654
O43790;Q14533	O43790;Q14533	KRT81_HUMAN;KRT86_HUMAN	KRT81;KRT86	Keratin, type II cuticular Hb6	Color2 [A=255, R=169, G=169, B=169]	1	4		17.0605	18.2498	19.5057	21.307	19.0083	18.3782	18.3377	18.8217	19.1318	18.9603	17.5968	18.7341
O43791	O43791	SPOP_HUMAN	SPOP	Speckle-type POZ protein	Color2 [A=255, R=169, G=169, B=169]	1	4		15.6828	16.4342	16.2999	16.2689	16.4396	17.0206	16.0283	16.3375	16.3613	16.2706	16.2953	16.5118
O43795	O43795	MYO1B_HUMAN	MYO1B	Unconventional myosin-Ib	Color2 [A=255, R=169, G=169, B=169]	1	4		18.9762	19.3538	19.1404	19.2042	19.6056	19.7638	19.7405	19.6498	19.053	19.6199	19.6152	19.5432
O43805	O43805	SSNA1_HUMAN	SSNA1	Microtubule nucleation factor SSNA1	Color2 [A=255, R=169, G=169, B=169]	1	4		10.5679	12.5728	11.6001	9.78943	10.3322	11.6783	10.7833	11.2462	11.3923	11.4694	11.4795	13.3832
O43808	O43808	PM34_HUMAN	SLC25A17	Peroxisomal membrane protein PMP34	Color2 [A=255, R=169, G=169, B=169]	1	4		17.5104	17.7714	17.7978	17.5851	17.6431	17.5914	17.4566	17.8272	17.4793	17.2346	16.898	16.6842
O43809	O43809	CPSF5_HUMAN	NUDT21	Cleavage and polyadenylation specificity factor subunit 5	Color2 [A=255, R=169, G=169, B=169]	1	4		17.1325	16.8514	16.7372	16.9343	16.6979	16.5468	16.8331	16.8077	16.7309	16.7387	17.0306	16.8017
O43813	O43813	LANC1_HUMAN	LANCL1	Glutathione S-transferase LANCL1	Color2 [A=255, R=169, G=169, B=169]	1	4		14.4875	14.3608	12.9964	14.2522	14.1372	14.0183	13.439	14.647	12.9717	14.4213	14.9134	14.4316
O43815	O43815	STRN_HUMAN	STRN	Striatin	Color2 [A=255, R=169, G=169, B=169]	1	4		15.0829	15.2466	15.3735	15.2322	15.3538	15.6565	15.4737	15.2279	15.5907	15.5933	15.0525	15.3091
O43818	O43818	U3IP2_HUMAN	RRP9	U3 small nucleolar RNA-interacting protein 2	Color2 [A=255, R=169, G=169, B=169]	1	4		20.2284	20.6045	20.3066	20.3671	20.1747	20.2222	20.25	20.3216	19.9355	20.1985	20.1887	19.929
O43819	O43819	SCO2_HUMAN	SCO2	Protein SCO2 homolog, mitochondrial	Color2 [A=255, R=169, G=169, B=169]	1	4		19.2211	18.9663	19.1699	18.8658	19.2376	18.9288	19.116	18.9622	19.1688	18.8299	18.7817	18.6967
O43822	O43822	CF410_HUMAN	CFAP410	Cilia- and flagella-associated protein 410	Color2 [A=255, R=169, G=169, B=169]	1	4		13.0162	12.5544	12.9633	12.4624	12.1366	12.2442	13.3352	12.7235	11.352	13.4051	12.9267	13.2105
O43823	O43823	AKAP8_HUMAN	AKAP8	A-kinase anchor protein 8	Color2 [A=255, R=169, G=169, B=169]	1	4		18.8321	18.7794	19.0499	18.7794	18.81	18.6878	18.858	18.4224	19.131	19.0509	18.8089	18.7675
O43824	O43824	GTPB6_HUMAN	GTPBP6	Putative GTP-binding protein 6	Color2 [A=255, R=169, G=169, B=169]	1	4		21.3684	20.8661	20.9935	21.0391	21.2284	20.9324	21.213	21.1161	21.1814	20.6568	20.4152	20.4076
O43826	O43826	G6PT1_HUMAN	SLC37A4	Glucose-6-phosphate exchanger SLC37A4	Color2 [A=255, R=169, G=169, B=169]	1	4		19.0319	18.9826	18.9966	19.1357	19.1913	18.9493	19.0449	19.1999	19.2154	19.0042	19.0196	18.6001
O43829	O43829	ZBT14_HUMAN	ZBTB14	Zinc finger and BTB domain-containing protein 14	Color2 [A=255, R=169, G=169, B=169]	1	4		13.6129	14.7246	14.8401	14.5506	14.4152	15.0964	14.6421	14.7966	14.1473	15.2754	14.6847	14.8397
O43837	O43837	IDH3B_HUMAN	IDH3B	Isocitrate dehydrogenase [NAD] subunit beta, mitochondrial	Color2 [A=255, R=169, G=169, B=169]	1	4		21.8212	21.4767	21.559	21.6525	21.674	21.5272	21.6128	21.644	21.7943	21.3347	21.1671	21.0209
O43847	O43847	NRDC_HUMAN	NRDC	Nardilysin	Color2 [A=255, R=169, G=169, B=169]	1	4		14.2441	14.8029	13.8153	15.0314	14.5231	14.3165	14.0235	14.1541	14.7017	15.2145	15.2187	15.3212
O43852	O43852	CALU_HUMAN	CALU	Calumenin	Color2 [A=255, R=169, G=169, B=169]	1	4		15.6029	15.2125	15.4104	15.6624	17.2438	17.5411	17.7969	17.3883	16.6562	18.0373	18.1207	18.2194
O43854	O43854	EDIL3_HUMAN	EDIL3	EGF-like repeat and discoidin I-like domain-containing protein 3	Color2 [A=255, R=169, G=169, B=169]	1	4		14.0125	15.2023	12.9354	12.8908	13.5222	13.7981	15.1694	14.1539	13.8831	14.3401	14.3278	13.6971
O43861	O43861	ATP9B_HUMAN	ATP9B	Probable phospholipid-transporting ATPase IIB	Color2 [A=255, R=169, G=169, B=169]	1	4		14.3043	15.4326	14.3877	15.4576	15.1046	15.0839	15.1103	15.4587	15.1378	15.1136	15.0834	15.279
O43861;O75110	O43861;O75110	ATP9A_HUMAN;ATP9B_HUMAN	ATP9A;ATP9B	Probable phospholipid-transporting ATPase IIB	Color2 [A=255, R=169, G=169, B=169]	1	4		14.5028	15.396	15.4184	15.2478	14.0811	14.5513	15.0805	14.8357	14.53	14.2832	14.9072	14.7536
O43865	O43865	SAHH2_HUMAN	AHCYL1	S-adenosylhomocysteine hydrolase-like protein 1	Color2 [A=255, R=169, G=169, B=169]	1	4		15.1313	15.6334	15.7566	15.4314	16.2966	16.472	16.5815	16.6729	16.5353	16.1435	16.5372	16.5853
O43865;Q96HN2	O43865;Q96HN2	SAHH2_HUMAN;SAHH3_HUMAN	AHCYL1;AHCYL2	S-adenosylhomocysteine hydrolase-like protein 1	Color2 [A=255, R=169, G=169, B=169]	1	4		16.1677	15.8063	16.3652	17.0657	17.7614	17.9781	17.9406	17.5743	17.3211	17.9619	17.8963	17.9585
O43896	O43896	KIF1C_HUMAN	KIF1C	Kinesin-like protein KIF1C	Color2 [A=255, R=169, G=169, B=169]	1	4		10.9937	13.7668	14.7515	12.5524	14.366	13.7787	15.0791	14.9005	13.9602	14.0333	14.2691	14.1573
O43896;O60333;Q12756	O43896;O60333;Q12756	KIF1A_HUMAN;KIF1B_HUMAN;KIF1C_HUMAN	KIF1A;KIF1B;KIF1C	Kinesin-like protein KIF1C	Color2 [A=255, R=169, G=169, B=169]	1	4		14.8711	15.233	15.5435	15.3462	15.4356	15.9256	15.727	15.5704	15.0364	16.0525	15.7489	16.2369
O43896;Q96L93;Q9NQT8	O43896;Q96L93;Q9H1H9;Q9NQT8;Q9P2P6	KI13B_HUMAN;KI16B_HUMAN;KIF1C_HUMAN	KIF13B;KIF16B;KIF1C	Kinesin-like protein KIF1C	Color2 [A=255, R=169, G=169, B=169]	1	4		9.8316	10.6874	10.2012	10.3875	12.0617	12.8288	12.7865	13.5446	9.84379	12.8749	14.0439	13.8309
O43900	O43900	PRIC3_HUMAN	PRICKLE3	Prickle planar cell polarity protein 3	Color2 [A=255, R=169, G=169, B=169]	1	4		14.2045	14.2381	14.4956	14.7964	15.0243	15.146	15.2898	14.8804	15.1937	15.8127	15.5202	15.5125
O43909	O43909	EXTL3_HUMAN	EXTL3	Exostosin-like 3	Color2 [A=255, R=169, G=169, B=169]	1	4		15.7423	15.287	15.5605	15.29	15.5241	15.6045	15.504	15.3668	15.3397	15.6768	15.8137	15.5542
O43913	O43913	ORC5_HUMAN	ORC5	Origin recognition complex subunit 5	Color2 [A=255, R=169, G=169, B=169]	1	4		16.6392	17.8749	18.0391	17.8085	16.613	17.7314	17.5397	17.6636	16.3002	17.4854	17.4894	17.1791
O43920	O43920	NDUS5_HUMAN	NDUFS5	NADH dehydrogenase [ubiquinone] iron-sulfur protein 5	Color2 [A=255, R=169, G=169, B=169]	1	4		15.4725	15.667	15.7677	16.2051	15.7236	15.8395	16.0997	15.9255	15.4318	15.6658	16.0045	15.5775
O43929	O43929	ORC4_HUMAN	ORC4	Origin recognition complex subunit 4	Color2 [A=255, R=169, G=169, B=169]	1	4		16.2892	16.7935	16.6122	16.5103	16.0581	16.2694	16.5672	16.396	16.1202	16.3966	16.4471	16.3742
O43933	O43933	PEX1_HUMAN	PEX1	Peroxisome biogenesis factor 1	Color2 [A=255, R=169, G=169, B=169]	1	4		18.7315	18.6054	18.6337	18.7045	18.6379	18.5396	18.7574	18.6826	18.4273	18.5646	18.4336	18.2573
O43934	O43934	MFS11_HUMAN	MFSD11	UNC93-like protein MFSD11	Color2 [A=255, R=169, G=169, B=169]	1	4		14.2309	13.4719	10.6797	13.4496	14.8979	14.5675	10.0772	10.775	13.6565	12.4663	12.3571	13.3067
O60216	O60216	RAD21_HUMAN	RAD21	Double-strand-break repair protein rad21 homolog	Color2 [A=255, R=169, G=169, B=169]	1	4		17.5994	18.051	18.257	18.2186	17.9136	18.8454	18.3455	17.9601	17.9473	18.5053	18.4894	18.4069
O60220	O60220	TIM8A_HUMAN	TIMM8A	Mitochondrial import inner membrane translocase subunit Tim8 A	Color2 [A=255, R=169, G=169, B=169]	1	4		12.9803	13.8485	13.0969	14.3932	14.3927	14.2217	12.5993	14.6042	13.6673	14.9633	13.9139	14.6298
O60229;O75962	O60229;O75962	KALRN_HUMAN;TRIO_HUMAN	KALRN;TRIO	Kalirin	Color2 [A=255, R=169, G=169, B=169]	1	4		12.6099	11.7143	13.3464	13.429	13.9841	14.3	14.3773	14.0827	13.3707	13.9058	15.0862	14.6935
O60231	O60231	DHX16_HUMAN	DHX16	Pre-mRNA-splicing factor ATP-dependent RNA helicase DHX16	Color2 [A=255, R=169, G=169, B=169]	1	4		14.6839	14.8063	15.0185	14.9054	14.5523	14.3862	14.8728	14.5906	14.4735	14.6979	15.0974	15.2
O60232	O60232	ZNRD2_HUMAN	ZNRD2	Protein ZNRD2	Color2 [A=255, R=169, G=169, B=169]	1	4		11.1887	9.92334	9.88919	11.1247	12.2927	13.1909	12.6325	13.6511	13.3845	10.992	12.3135	11.7498
O60238	O60238	BNI3L_HUMAN	BNIP3L	BCL2/adenovirus E1B 19 kDa protein-interacting protein 3-like	Color2 [A=255, R=169, G=169, B=169]	1	4		13.9405	15.3831	15.4639	14.6862	15.3737	14.1703	15.1284	14.0229	13.9045	15.7747	15.2226	13.4104
O60241	O60241	AGRB2_HUMAN	ADGRB2	Adhesion G protein-coupled receptor B2	Color2 [A=255, R=169, G=169, B=169]	1	4		13.461	12.5766	13.0847	12.4728	12.8687	13.973	12.7987	12.3861	13.5659	13.6236	13.6089	13.7483
O60243	O60243	H6ST1_HUMAN	HS6ST1	Heparan-sulfate 6-O-sulfotransferase 1	Color2 [A=255, R=169, G=169, B=169]	1	4		12.5994	14.0115	13.0492	11.8494	13.4933	12.8469	14.5291	13.2807	12.9311	13.6702	12.4693	11.3593
O60244	O60244	MED14_HUMAN	MED14	Mediator of RNA polymerase II transcription subunit 14	Color2 [A=255, R=169, G=169, B=169]	1	4		16.094	16.759	16.5786	16.5706	16.3284	16.9452	16.6279	16.77	16.4231	16.9212	16.8908	16.637
O60245	O60245	PCDH7_HUMAN	PCDH7	Protocadherin-7	Color2 [A=255, R=169, G=169, B=169]	1	4		11.5927	10.7742	14.133	11.1032	11.4751	12.9887	10.4934	12.004	12.1177	13.4126	14.6114	13.6845
O60256	O60256	KPRB_HUMAN	PRPSAP2	Phosphoribosyl pyrophosphate synthase-associated protein 2	Color2 [A=255, R=169, G=169, B=169]	1	4		14.081	14.025	12.239	14.1875	14.4987	14.5944	13.8168	14.3927	14.9705	14.4943	14.9776	14.3072
O60256;Q14558	O60256;Q14558	KPRA_HUMAN;KPRB_HUMAN	PRPSAP1;PRPSAP2	Phosphoribosyl pyrophosphate synthase-associated protein 2	Color2 [A=255, R=169, G=169, B=169]	1	4		12.4906	10.6491	10.0326	12.2359	13.3462	10.1532	10.2865	11.0506	11.6108	9.7977	13.4883	13.6405
O60264	O60264	SMCA5_HUMAN	SMARCA5	SWI/SNF-related matrix-associated actin-dependent regulator of chromatin subfamily A member 5	Color2 [A=255, R=169, G=169, B=169]	1	4		20.2909	21.7661	21.7621	21.6144	20.3913	21.7968	21.5262	21.4738	20.3231	21.3691	21.418	21.1466
O60264;P28370	O60264;P28370	SMCA1_HUMAN;SMCA5_HUMAN	SMARCA1;SMARCA5	SWI/SNF-related matrix-associated actin-dependent regulator of chromatin subfamily A member 5	Color2 [A=255, R=169, G=169, B=169]	1	4		20.2799	21.7179	21.8232	21.6399	20.5475	21.8263	21.5736	21.4769	20.2857	21.2851	21.4123	21.1918
O60266	O60266	ADCY3_HUMAN	ADCY3	Adenylate cyclase type 3	Color2 [A=255, R=169, G=169, B=169]	1	4		15.4649	15.3383	15.4324	15.0901	14.9272	15.1793	15.2406	15.4718	14.868	15.3279	14.8504	14.2721
O60271	O60271	JIP4_HUMAN	SPAG9	C-Jun-amino-terminal kinase-interacting protein 4	Color2 [A=255, R=169, G=169, B=169]	1	4		12.2114	13.4676	13.7566	12.7378	13.0443	12.8824	13.3902	13.1138	13.4279	13.1184	13.4371	13.7473
O60271;Q9UPT6	O60271;Q9UPT6	JIP3_HUMAN;JIP4_HUMAN	MAPK8IP3;SPAG9	C-Jun-amino-terminal kinase-interacting protein 4	Color2 [A=255, R=169, G=169, B=169]	1	4		13.8788	14.1184	13.3103	14.3006	13.9454	15.4743	14.9457	14.6837	12.5541	15.4718	15.2883	15.2162
O60281	O60281	ZN292_HUMAN	ZNF292	Zinc finger protein 292	Color2 [A=255, R=169, G=169, B=169]	1	4		15.1845	17.9143	17.8828	17.7708	16.12	18.2699	18.0482	18.0622	15.7457	17.7222	17.8438	17.7255
O60282	O60282	KIF5C_HUMAN	KIF5C	Kinesin heavy chain isoform 5C	Color2 [A=255, R=169, G=169, B=169]	1	4		14.7179	13.8226	15.1191	14.6161	15.0217	15.8041	15.9117	15.9464	15.6404	15.9078	15.9223	15.6498
O60282;P33176;Q12840	O60282;P33176;Q12840	KIF5A_HUMAN;KIF5C_HUMAN;KINH_HUMAN	KIF5A;KIF5B;KIF5C	Kinesin heavy chain isoform 5C	Color2 [A=255, R=169, G=169, B=169]	1	4		16.1957	17.2119	17.1232	17.207	17.0469	18.5431	18.1737	17.9646	16.7589	18.2997	18.1365	18.0623
O60282;Q12840	O60282;Q12840	KIF5A_HUMAN;KIF5C_HUMAN	KIF5A;KIF5C	Kinesin heavy chain isoform 5C	Color2 [A=255, R=169, G=169, B=169]	1	4		13.8357	14.0401	14.5217	14.4223	14.5914	15.6128	15.3271	15.4754	14.9674	15.7344	15.4999	15.3384
O60284	O60284	ST18_HUMAN	ST18	Suppression of tumorigenicity 18 protein	Color2 [A=255, R=169, G=169, B=169]	1	4		14.5271	16.5105	16.4081	16.4052	15.2327	16.8073	16.6631	16.3986	15.2132	16.5001	16.5961	16.3359
O60284;Q01538	O60284;Q01538;Q9UL68	MYT1_HUMAN;ST18_HUMAN	MYT1;ST18	Suppression of tumorigenicity 18 protein	Color2 [A=255, R=169, G=169, B=169]	1	4		13.9986	15.6909	15.1381	14.1713	13.4279	15.5119	14.2144	15.5335	12.9587	14.5492	14.4323	13.5118
O60284;Q01538;Q9UL68	O60284;Q01538;Q9UL68	MYT1L_HUMAN;MYT1_HUMAN;ST18_HUMAN	MYT1;MYT1L;ST18	Suppression of tumorigenicity 18 protein	Color2 [A=255, R=169, G=169, B=169]	1	4		15.6234	15.2327	16.1755	15.2778	9.77506	15.5613	15.8856	15.1455	15.3403	15.4853	16.1528	15.6058
O60284;Q9UL68	O60284;Q9UL68	MYT1L_HUMAN;ST18_HUMAN	MYT1L;ST18	Suppression of tumorigenicity 18 protein	Color2 [A=255, R=169, G=169, B=169]	1	4		12.3519	15.5951	15.6657	15.4039	14.4227	15.7124	15.7679	15.478	12.7021	15.3034	15.3144	15.0556
O60285	O60285	NUAK1_HUMAN	NUAK1	NUAK family SNF1-like kinase 1	Color2 [A=255, R=169, G=169, B=169]	1	4		11.6505	13.6613	11.6362	14.6983	13.9967	13.9814	14.0571	13.008	11.9166	14.3167	14.5535	13.7059
O60287	O60287	NPA1P_HUMAN	URB1	Nucleolar pre-ribosomal-associated protein 1	Color2 [A=255, R=169, G=169, B=169]	1	4		15.4061	16.3745	16.405	16.6063	15.9904	16.5927	16.622	16.8759	15.9157	16.7456	16.758	17.0597
O60290	O60290	ZN862_HUMAN	ZNF862	Zinc finger protein 862	Color2 [A=255, R=169, G=169, B=169]	1	4		11.6117	13.1419	13.0611	13.3605	13.0467	12.6878	13.0696	12.189	12.6888	12.3545	13.2876	12.9314
O60291	O60291	MGRN1_HUMAN	MGRN1	E3 ubiquitin-protein ligase MGRN1	Color2 [A=255, R=169, G=169, B=169]	1	4		14.4637	14.9616	14.7308	15.3811	15.4719	15.4776	15.3201	15.4613	15.5288	15.8633	15.6575	15.9663
O60291;Q96PX1	O60291;Q96PX1	MGRN1_HUMAN;RN157_HUMAN	MGRN1;RNF157	E3 ubiquitin-protein ligase MGRN1	Color2 [A=255, R=169, G=169, B=169]	1	4		14.6006	13.8366	14.502	14.5501	15.288	15.4422	15.6103	15.3733	14.9894	16.0219	15.8659	15.976
O60292	O60292	SI1L3_HUMAN	SIPA1L3	Signal-induced proliferation-associated 1-like protein 3	Color2 [A=255, R=169, G=169, B=169]	1	4		16.2559	17.0411	16.8562	17.1542	16.0134	16.9588	16.5394	16.438	16.23	16.9274	16.5367	16.2787
O60293	O60293	ZC3H1_HUMAN	ZFC3H1	Zinc finger C3H1 domain-containing protein	Color2 [A=255, R=169, G=169, B=169]	1	4		15.9081	16.0577	16.2604	16.3364	16.2107	16.5477	16.3288	16.2288	16.0979	16.384	16.4769	16.2789
O60294	O60294	TYW4_HUMAN	LCMT2	tRNA wybutosine-synthesizing protein 4	Color2 [A=255, R=169, G=169, B=169]	1	4		11.477	12.8695	10.6254	12.5721	12.2205	13.1648	13.188	12.6281	10.9395	13.3241	14.0105	14.0461
O60296	O60296	TRAK2_HUMAN	TRAK2	Trafficking kinesin-binding protein 2	Color2 [A=255, R=169, G=169, B=169]	1	4		13.7527	14.5292	14.8477	14.4493	14.0946	14.1616	14.3302	14.4283	13.7831	14.592	14.479	14.1455
O60299	O60299	LZTS3_HUMAN	LZTS3	Leucine zipper putative tumor suppressor 3	Color2 [A=255, R=169, G=169, B=169]	1	4		12.2622	13.9073	13.4601	12.9185	13.3072	14.0943	14.0013	14.0296	11.842	13.6043	13.0397	13.1573
O60303	O60303	KATIP_HUMAN	KATNIP	Katanin-interacting protein	Color2 [A=255, R=169, G=169, B=169]	1	4		15.9	15.9885	15.205	15.8589	16.0083	15.7052	15.6498	15.4346	15.7447	16.3461	15.6482	15.121
O60304;Q63HK3	O60304;Q63HK3	ZKSC2_HUMAN;ZN500_HUMAN	ZKSCAN2;ZNF500	Zinc finger protein 500	Color2 [A=255, R=169, G=169, B=169]	1	4		11.4332	10.859	11.4936	10.4857	10.0198	14.1014	13.5178	13.3595	12.0033	13.8618	13.3003	11.9279
O60306	O60306	AQR_HUMAN	AQR	RNA helicase aquarius	Color2 [A=255, R=169, G=169, B=169]	1	4		18.7068	18.8326	18.5578	18.778	18.8187	18.9002	18.6227	18.6629	18.8238	18.9811	19.0447	18.7988
O60306;Q5JTH9	O60306;Q5JTH9	AQR_HUMAN;RRP12_HUMAN	AQR;RRP12	RNA helicase aquarius	Color2 [A=255, R=169, G=169, B=169]	1	4		17.0489	17.3699	17.4632	17.3404	17.4098	17.2171	17.0493	17.258	16.8878	17.657	17.7333	17.3855
O60307	O60307	MAST3_HUMAN	MAST3	Microtubule-associated serine/threonine-protein kinase 3	Color2 [A=255, R=169, G=169, B=169]	1	4		12.6172	13.1457	13.351	14.5544	12.4052	14.1085	14.2807	13.9832	11.8864	14.1912	14.2847	14.0728
O60307;Q6P0Q8	O60307;Q6P0Q8	MAST2_HUMAN;MAST3_HUMAN	MAST2;MAST3	Microtubule-associated serine/threonine-protein kinase 3	Color2 [A=255, R=169, G=169, B=169]	1	4		11.2384	12.0601	12.383	13.0645	13.0309	14.1992	13.562	13.8197	13.0419	13.4832	13.172	13.8184
O60307;Q9Y2H9	O60307;Q9Y2H9	MAST1_HUMAN;MAST3_HUMAN	MAST1;MAST3	Microtubule-associated serine/threonine-protein kinase 3	Color2 [A=255, R=169, G=169, B=169]	1	4		13.4263	13.3781	13.4491	11.0282	12.9666	13.7048	13.8271	12.6559	10.1553	13.6762	13.2181	12.6545
O60313	O60313	OPA1_HUMAN	OPA1	Dynamin-like 120 kDa protein, mitochondrial	Color2 [A=255, R=169, G=169, B=169]	1	4		18.3511	18.4273	18.3077	18.3379	18.4215	18.3869	18.4413	18.3791	18.3215	18.2281	18.2148	18.1209
O60315	O60315	ZEB2_HUMAN	ZEB2	Zinc finger E-box-binding homeobox 2	Color2 [A=255, R=169, G=169, B=169]	1	4		14.9205	15.8478	16.1128	16.2074	15.3191	16.7998	16.486	16.367	15.4181	16.7906	16.7818	16.6767
O60315;P37275	O60315;P37275	ZEB1_HUMAN;ZEB2_HUMAN	ZEB1;ZEB2	Zinc finger E-box-binding homeobox 2	Color2 [A=255, R=169, G=169, B=169]	1	4		12.8492	14.3096	14.1603	14.7664	13.5914	15.4384	14.7331	14.8906	14.144	15.0634	15.2504	15.3676
O60318	O60318	GANP_HUMAN	MCM3AP	Germinal-center associated nuclear protein	Color2 [A=255, R=169, G=169, B=169]	1	4		16.59	17.3821	17.4561	17.5485	17.3585	17.5409	17.3787	17.4561	17.1308	17.5906	17.5985	17.4604
O60331	O60331	PI51C_HUMAN	PIP5K1C	Phosphatidylinositol 4-phosphate 5-kinase type-1 gamma	Color2 [A=255, R=169, G=169, B=169]	1	4		14.7351	15.2319	14.9807	14.9408	14.7699	15.0644	15.6358	15.4521	15.1531	15.2382	15.2107	15.5485
O60331;Q99755	O60331;Q99755;A2A3N6	PI51A_HUMAN;PI51C_HUMAN	PIP5K1A;PIP5K1C	Phosphatidylinositol 4-phosphate 5-kinase type-1 gamma	Color2 [A=255, R=169, G=169, B=169]	1	4		17.6306	17.9627	18.2134	18.2657	17.8273	18.2905	18.3168	18.264	17.9045	18.4169	18.361	18.11
O60333	O60333	KIF1B_HUMAN	KIF1B	Kinesin-like protein KIF1B	Color2 [A=255, R=169, G=169, B=169]	1	4		13.8643	13.8879	13.8877	14.1833	14.1376	14.1695	12.6198	14.0555	14.1372	14.505	14.1478	14.8261
O60333;Q12756	O60333;Q12756	KIF1A_HUMAN;KIF1B_HUMAN	KIF1A;KIF1B	Kinesin-like protein KIF1B	Color2 [A=255, R=169, G=169, B=169]	1	4		14.4343	14.4391	14.6873	14.7069	15.0911	15.5001	15.3614	15.1534	14.4099	15.7419	15.5922	15.881
O60336	O60336	MABP1_HUMAN	MAPKBP1	Mitogen-activated protein kinase-binding protein 1	Color2 [A=255, R=169, G=169, B=169]	1	4		11.8139	13.2357	13.5564	12.1613	12.4867	10.9202	13.5335	13.199	13.319	13.9389	13.6374	14.1214
O60337	O60337	MARH6_HUMAN	MARCHF6	E3 ubiquitin-protein ligase MARCHF6	Color2 [A=255, R=169, G=169, B=169]	1	4		13.6936	13.0608	10.457	12.3514	12.7416	13.0697	12.6645	13.0111	13.1844	12.6926	13.3844	13.2609
O60341	O60341	KDM1A_HUMAN	KDM1A	Lysine-specific histone demethylase 1A	Color2 [A=255, R=169, G=169, B=169]	1	4		19.5391	20.0353	19.998	19.9028	20.0303	20.1944	19.9735	20.0612	20.0419	20.2904	20.2563	20.0614
O60343	O60343	TBCD4_HUMAN	TBC1D4	TBC1 domain family member 4	Color2 [A=255, R=169, G=169, B=169]	1	4		12.7449	14.407	14.9654	14.4859	14.0968	14.4559	14.2773	14.5818	13.8159	14.6995	15.122	15.5552
O60353	O60353	FZD6_HUMAN	FZD6	Frizzled-6	Color2 [A=255, R=169, G=169, B=169]	1	4		13.0448	12.9981	13.1654	13.6854	13.079	14.2528	14.053	13.6582	13.3691	14.4444	14.1656	13.8321
O60427	O60427	FADS1_HUMAN	FADS1	Acyl-CoA (8-3)-desaturase	Color2 [A=255, R=169, G=169, B=169]	1	4		19.7491	19.9104	19.7409	19.6377	19.6843	19.869	19.9428	20.075	19.761	19.6526	19.6322	19.5688
O60427;O95864	O60427;O95864	FADS1_HUMAN;FADS2_HUMAN	FADS1;FADS2	Acyl-CoA (8-3)-desaturase	Color2 [A=255, R=169, G=169, B=169]	1	4		15.7509	15.913	14.5427	16.0804	15.5541	15.9372	16.2646	14.8392	16.2883	16.2692	15.9523	15.8751
O60437	O60437	PEPL_HUMAN	PPL	Periplakin	Color2 [A=255, R=169, G=169, B=169]	1	4		10.7107	13.1374	13.2154	14.2873	13.3387	10.7241	14.4917	13.3007	15.8748	10.9094	14.1288	13.3942
O60443	O60443	GSDME_HUMAN	GSDME	Gasdermin-E	Color2 [A=255, R=169, G=169, B=169]	1	4		11.0587	10.9125	11.4881	11.2166	11.2623	11.0498	9.26535	11.4851	11.6313	11.5873	12.5732	12.9001
O60462	O60462	NRP2_HUMAN	NRP2	Neuropilin-2	Color2 [A=255, R=169, G=169, B=169]	1	4		14.5105	14.8945	15.4073	14.0392	15.935	15.4522	15.8231	15.9216	14.9806	15.5478	15.5488	14.8985
O60476	O60476	MA1A2_HUMAN	MAN1A2	Mannosyl-oligosaccharide 1,2-alpha-mannosidase IB	Color2 [A=255, R=169, G=169, B=169]	1	4		17.5257	17.3306	17.3049	17.3612	17.3283	16.9742	17.4908	17.223	17.0794	17.1645	17.2539	16.9793
O60479	O60479	DLX3_HUMAN	DLX3	Homeobox protein DLX-3	Color2 [A=255, R=169, G=169, B=169]	1	4		17.4898	17.6108	18.0407	17.8071	16.8809	17.5284	17.3537	17.1864	17.0661	17.7314	17.7621	17.6639
O60488	O60488	ACSL4_HUMAN	ACSL4	Long-chain-fatty-acid--CoA ligase 4	Color2 [A=255, R=169, G=169, B=169]	1	4		18.2002	18.1287	18.0969	18.2148	18.9523	18.9328	19.1556	19.0393	18.2827	18.965	19.0198	18.8886
O60488;O95573	O60488;O95573	ACSL3_HUMAN;ACSL4_HUMAN	ACSL3;ACSL4	Long-chain-fatty-acid--CoA ligase 4	Color2 [A=255, R=169, G=169, B=169]	1	4		19.8356	19.7571	19.9171	19.152	20.0735	19.6031	19.3892	19.5968	19.5187	19.4181	19.4356	19.6154
O60493	O60493	SNX3_HUMAN	SNX3	Sorting nexin-3	Color2 [A=255, R=169, G=169, B=169]	1	4		14.9456	15.2689	15.1262	15.5979	15.5999	16.0816	15.512	16.0716	15.9228	15.9663	16.198	16.8907
O60493;Q9UMY4	O60493;Q9UMY4	SNX12_HUMAN;SNX3_HUMAN	SNX12;SNX3	Sorting nexin-3	Color2 [A=255, R=169, G=169, B=169]	1	4		14.7487	15.1661	14.9915	15.7511	15.4436	16.1667	16.2985	15.6872	15.9101	16.4048	16.4807	16.8964
O60499	O60499	STX10_HUMAN	STX10	Syntaxin-10	Color2 [A=255, R=169, G=169, B=169]	1	4		13.3923	11.5443	12.4927	13.296	12.8714	12.5849	13.5639	13.8884	12.4136	13.625	13.1881	13.0495
O60502	O60502	OGA_HUMAN	OGA	Protein O-GlcNAcase	Color2 [A=255, R=169, G=169, B=169]	1	4		14.8329	14.306	14.2058	14.755	14.587	14.6613	15.444	15.0327	15.0709	15.617	15.9188	16.0598
O60503	O60503	ADCY9_HUMAN	ADCY9	Adenylate cyclase type 9	Color2 [A=255, R=169, G=169, B=169]	1	4		14.6847	14.711	15.0172	14.5983	14.4306	14.4069	14.5294	14.2713	14.8862	14.7338	14.6964	14.8861
O60506	O60506	HNRPQ_HUMAN	SYNCRIP	Heterogeneous nuclear ribonucleoprotein Q	Color2 [A=255, R=169, G=169, B=169]	1	4		19.6588	19.7004	19.7213	19.9626	19.4666	18.7175	19.2156	18.9987	19.3567	19.6469	19.6716	19.5359
O60507	O60507	TPST1_HUMAN	TPST1	Protein-tyrosine sulfotransferase 1	Color2 [A=255, R=169, G=169, B=169]	1	4		14.6797	14.9745	14.9632	14.9084	14.5264	14.8037	14.8029	14.8504	14.3313	14.6989	14.7428	14.8566
O60508	O60508	PRP17_HUMAN	CDC40	Pre-mRNA-processing factor 17	Color2 [A=255, R=169, G=169, B=169]	1	4		17.7515	18.1886	17.8377	17.8047	18.1416	18.1387	18.1208	17.9345	17.9552	18.2329	18.3949	18.2884
O60512	O60512	B4GT3_HUMAN	B4GALT3	Beta-1,4-galactosyltransferase 3	Color2 [A=255, R=169, G=169, B=169]	1	4		17.9699	18.0406	17.8284	17.6255	17.4836	17.1292	17.8074	17.5454	17.6219	17.4038	17.0672	17.0322
O60518	O60518	RNBP6_HUMAN	RANBP6	Ran-binding protein 6	Color2 [A=255, R=169, G=169, B=169]	1	4		15.6354	15.2107	15.5946	15.1795	15.8763	15.9586	15.9562	16.1732	15.8624	16.1326	16.2075	15.9243
O60524	O60524	NEMF_HUMAN	NEMF	Ribosome quality control complex subunit NEMF	Color2 [A=255, R=169, G=169, B=169]	1	4		14.9583	13.7787	14.8448	14.494	15.0789	14.3972	15.0701	14.8132	14.6933	15.2734	15.0021	15.3596
O60547	O60547	GMDS_HUMAN	GMDS	GDP-mannose 4,6 dehydratase	Color2 [A=255, R=169, G=169, B=169]	1	4		13.5249	13.5731	13.9505	14.3483	14.2471	14.6739	14.6183	14.9458	14.6914	14.701	15.0287	15.6329
O60548	O60548	FOXD2_HUMAN	FOXD2	Forkhead box protein D2	Color2 [A=255, R=169, G=169, B=169]	1	4		9.80341	10.0322	10.7573	10.4231	11.9652	11.5832	12.0145	12.8497	9.93317	11.284	13.8993	11.9066
O60551	O60551;P30419	NMT2_HUMAN	NMT2	Glycylpeptide N-tetradecanoyltransferase 2	Color2 [A=255, R=169, G=169, B=169]	1	4		12.4395	14.2655	14.2556	13.3268	13.0489	14.0811	13.9547	12.6312	13.3228	14.4172	14.1032	14.8231
O60563	O60563	CCNT1_HUMAN	CCNT1	Cyclin-T1	Color2 [A=255, R=169, G=169, B=169]	1	4		15.6878	16.4043	16.3237	16.1059	16.7488	16.7757	16.3329	16.0824	16.7987	16.2403	16.5277	16.2415
O60566	O60566	BUB1B_HUMAN	BUB1B	Mitotic checkpoint serine/threonine-protein kinase BUB1 beta	Color2 [A=255, R=169, G=169, B=169]	1	4		10.0016	9.78696	11.3593	11.7239	10.4836	12.1107	11.2488	11.8183	10.7763	12.4268	13.1072	12.1564
O60568	O60568	PLOD3_HUMAN	PLOD3	Multifunctional procollagen lysine hydroxylase and glycosyltransferase LH3	Color2 [A=255, R=169, G=169, B=169]	1	4		16.5723	16.6125	16.148	16.5225	17.9517	18.0206	18.2385	18.0306	17.1552	18.7591	18.7182	18.6671
O60573	O60573	IF4E2_HUMAN	EIF4E2	Eukaryotic translation initiation factor 4E type 2	Color2 [A=255, R=169, G=169, B=169]	1	4		13.443	14.0311	14.2124	11.8019	15.2677	11.7258	13.0767	14.4859	14.3036	14.8251	14.5496	14.5504
O60583	O60583	CCNT2_HUMAN	CCNT2	Cyclin-T2	Color2 [A=255, R=169, G=169, B=169]	1	4		13.5275	14.1766	14.7222	15.2647	14.9957	15.3005	15.2371	14.6388	14.6714	15.3353	14.6604	15.3858
O60610	O60610	DIAP1_HUMAN	DIAPH1	Protein diaphanous homolog 1	Color2 [A=255, R=169, G=169, B=169]	1	4		18.7878	17.0934	18.2866	18.1713	18.3879	18.1291	17.9647	18.5567	18.0298	18.5099	18.5812	18.7595
O60613	O60613	SEP15_HUMAN	SELENOF	Selenoprotein F	Color2 [A=255, R=169, G=169, B=169]	1	4		16.3045	15.7914	16.5668	16.2005	16.9029	17.1884	17.3752	17.1638	16.5483	17.9169	17.6774	17.9235
O60645	O60645	EXOC3_HUMAN	EXOC3	Exocyst complex component 3	Color2 [A=255, R=169, G=169, B=169]	1	4		14.2385	14.7345	14.8966	14.3069	14.8807	15.1727	15.5211	15.285	15.2067	15.2241	15.1031	15.2928
O60658	O60658	PDE8A_HUMAN	PDE8A	High affinity cAMP-specific and IBMX-insensitive 3',5'-cyclic phosphodiesterase 8A	Color2 [A=255, R=169, G=169, B=169]	1	4		16.9524	16.7987	16.5248	16.7457	16.8369	16.9726	17.2439	16.8114	16.4625	17.1223	17.0992	16.995
O60658;O95263	O60658;O95263	PDE8A_HUMAN;PDE8B_HUMAN	PDE8A;PDE8B	High affinity cAMP-specific and IBMX-insensitive 3',5'-cyclic phosphodiesterase 8A	Color2 [A=255, R=169, G=169, B=169]	1	4		12.4207	13.7999	11.9523	12.8326	13.3529	13.8221	12.3389	13.3023	12.4111	14.2831	13.9893	13.1627
O60662	O60662	KLH41_HUMAN	KLHL41	Kelch-like protein 41	Color2 [A=255, R=169, G=169, B=169]	1	4		11.6229	11.4977	11.4809	11.3215	10.6897	12.0259	11.3161	11.0506	10.6066	13.1585	13.3738	13.5768
O60664	O60664	PLIN3_HUMAN	PLIN3	Perilipin-3	Color2 [A=255, R=169, G=169, B=169]	1	4		12.6823	13.1429	13.0744	13.6474	14.0141	13.0444	12.664	13.455	14.0803	14.4016	14.4922	14.9453
O60669	O60669	MOT2_HUMAN	SLC16A7	Monocarboxylate transporter 2	Color2 [A=255, R=169, G=169, B=169]	1	4		16.6704	17.0642	16.4768	16.7385	16.2396	15.9096	16.3081	16.6978	15.7627	15.8619	15.5676	15.6144
O60671	O60671	RAD1_HUMAN	RAD1	Cell cycle checkpoint protein RAD1	Color2 [A=255, R=169, G=169, B=169]	1	4		12.0687	9.88181	11.7398	14.2527	9.725	13.7742	13.3764	13.7849	12.166	13.639	13.7305	13.1584
O60673	O60673	REV3L_HUMAN	REV3L	DNA polymerase zeta catalytic subunit	Color2 [A=255, R=169, G=169, B=169]	1	4		13.7484	16.6839	16.7107	16.6177	14.3573	16.8533	16.4303	16.4082	13.9923	15.7608	15.667	15.5544
O60674	O60674	JAK2_HUMAN	JAK2	Tyrosine-protein kinase JAK2	Color2 [A=255, R=169, G=169, B=169]	1	4		12.7148	13.4367	13.2601	12.743	13.6996	13.4319	13.6127	13.9422	12.6571	13.9468	14.0033	13.6704
O60674;P23458	O60674;P23458	JAK1_HUMAN;JAK2_HUMAN	JAK1;JAK2	Tyrosine-protein kinase JAK2	Color2 [A=255, R=169, G=169, B=169]	1	4		15.8683	15.5978	15.3062	16.0611	15.5401	15.5132	16.4407	15.8782	15.9484	16.3128	16.3178	16.401
O60675	O60675	MAFK_HUMAN	MAFK	Transcription factor MafK	Color2 [A=255, R=169, G=169, B=169]	1	4		10.6815	10.6791	11.0145	10.3133	10.3272	10.4853	11.5801	10.2309	10.5375	11.9558	9.06579	11.3224
O60678	O60678	ANM3_HUMAN	PRMT3	Protein arginine N-methyltransferase 3	Color2 [A=255, R=169, G=169, B=169]	1	4		14.285	13.8479	14.0526	13.9742	14.1675	14.0417	14.7369	14.4262	13.9435	14.585	14.7494	15.1474
O60683	O60683	PEX10_HUMAN	PEX10	Peroxisome biogenesis factor 10	Color2 [A=255, R=169, G=169, B=169]	1	4		15.9905	15.8304	16.2249	16.069	15.6827	15.6397	15.7689	15.9763	15.6588	16.0286	15.6986	15.5629
O60684	O60684	IMA7_HUMAN	KPNA6	Importin subunit alpha-7	Color2 [A=255, R=169, G=169, B=169]	1	4		17.7535	18.3673	18.345	18.3442	17.8752	18.1619	17.8627	18.0175	18.3444	18.6048	18.7987	18.7078
O60684;P52294	O60684;P52294	IMA5_HUMAN;IMA7_HUMAN	KPNA1;KPNA6	Importin subunit alpha-7	Color2 [A=255, R=169, G=169, B=169]	1	4		14.1624	15.6073	15.3302	16.0058	15.6349	15.9486	15.6874	16.109	15.8441	16.1858	16.3543	16.206
O60701	O60701	UGDH_HUMAN	UGDH	UDP-glucose 6-dehydrogenase	Color2 [A=255, R=169, G=169, B=169]	1	4		15.4009	15.7881	15.6753	15.9754	15.849	15.9307	16.1542	16.1248	15.5493	16.6068	16.6269	17.0529
O60704	O60704	TPST2_HUMAN	TPST2	Protein-tyrosine sulfotransferase 2	Color2 [A=255, R=169, G=169, B=169]	1	4		13.8018	14.5247	12.8819	12.3451	14.2024	14.1057	14.9401	13.76	12.8335	14.5768	13.9138	14.2853
O60716	O60716	CTND1_HUMAN	CTNND1	Catenin delta-1	Color2 [A=255, R=169, G=169, B=169]	1	4		18.0951	18.2298	18.2002	18.3046	18.6064	18.701	18.7064	18.5405	18.5225	18.9152	18.8461	18.8165
O60725	O60725	ICMT_HUMAN	ICMT	Protein-S-isoprenylcysteine O-methyltransferase	Color2 [A=255, R=169, G=169, B=169]	1	4		20.1899	20.0014	20.3482	20.1619	20.4706	19.9732	20.1142	20.3217	20.3752	20.2021	20.1711	19.9409
O60732	O60732	MAGC1_HUMAN	MAGEC1	Melanoma-associated antigen C1	Color2 [A=255, R=169, G=169, B=169]	1	4		14.1336	14.0578	14.3404	14.4297	16.4621	17.5137	17.239	17.1299	16.4189	16.7759	17.0716	16.7899
O60732;P43363	P43355;P43358;P43361;Q96M61;P43363;O60732;A2A368;A8MXT2;O15480	MAGAA_HUMAN;MAGC1_HUMAN	MAGEA10;MAGEC1	Melanoma-associated antigen C1	Color2 [A=255, R=169, G=169, B=169]	1	4		14.1379	14.9349	15.1405	15.3382	15.4108	16.0735	15.4841	16.0801	15.3455	15.9862	15.7796	15.9936
O60732;Q9UBF1	Q9UBF1;O60732	MAGC1_HUMAN;MAGC2_HUMAN	MAGEC1;MAGEC2	Melanoma-associated antigen C1	Color2 [A=255, R=169, G=169, B=169]	1	4		11.5596	10.9024	12.7183	10.1221	13.1699	13.7593	10.6462	13.749	13.3626	13.4337	13.0092	13.0301
O60733	O60733	PLPL9_HUMAN	PLA2G6	85/88 kDa calcium-independent phospholipase A2	Color2 [A=255, R=169, G=169, B=169]	1	4		15.6899	15.2388	15.2961	15.4863	15.4306	15.4706	15.3546	15.6299	15.0223	15.053	15.024	15.1254
O60749	O60749	SNX2_HUMAN	SNX2	Sorting nexin-2	Color2 [A=255, R=169, G=169, B=169]	1	4		13.4898	11.2104	13.4098	11.7861	13.1183	13.051	13.6006	13.0681	13.2836	13.6669	13.148	13.876
O60749;Q13596	O60749;Q13596	SNX1_HUMAN;SNX2_HUMAN	SNX1;SNX2	Sorting nexin-2	Color2 [A=255, R=169, G=169, B=169]	1	4		10.6392	13.0477	10.2984	13.7636	14.1851	12.9354	13.4871	13.6831	13.7092	14.1608	13.0166	11.7135
O60762	O60762	DPM1_HUMAN	DPM1	Dolichol-phosphate mannosyltransferase subunit 1	Color2 [A=255, R=169, G=169, B=169]	1	4		21.7608	21.7803	21.851	21.6714	21.5601	21.5558	21.63	21.5453	21.756	21.4646	21.4127	21.2727
O60763	O60763	USO1_HUMAN	USO1	General vesicular transport factor p115	Color2 [A=255, R=169, G=169, B=169]	1	4		15.2946	14.8278	15.4404	15.4118	15.3053	15.3045	15.262	15.4808	15.1659	15.6335	15.7428	15.8236
O60765	O60765	Z354A_HUMAN	ZNF354A	Zinc finger protein 354A	Color2 [A=255, R=169, G=169, B=169]	1	4		13.485	13.585	14.2382	13.0487	13.3555	13.2311	12.8801	14.1351	13.7294	13.9214	14.1165	13.8398
O60765;O75373;P17097;Q14588;Q16670;Q2VY69;Q63HK3;Q6PG37;Q8NB42;Q8NEM1;Q8TF32;Q96LW1;Q99676;Q9NZL3;Q9UK13;Q9Y2L8	P17027;Q12901;Q16670;Q9NZL3;O60765;P17097;P51522;P51815;P52737;Q3ZCX4;Q63HK3;Q8N7M2;Q9UK11;Q9UK13;Q9Y2H8;Q9Y2L8;O75373;Q14588;Q2VY69;Q6PG37;Q6ZMS4;Q8N2I2;Q8N9F8;Q8NB42;Q8NEM1;Q8TB69;Q8TF20;Q8TF32;Q92670;Q96LW1;Q99676;Q9UK10;Q9UK12;P0CJ79	Z354A_HUMAN;Z354B_HUMAN;ZKSC2_HUMAN;ZKSC5_HUMAN;ZN184_HUMAN;ZN221_HUMAN;ZN224_HUMAN;ZN234_HUMAN;ZN284_HUMAN;ZN431_HUMAN;ZN527_HUMAN;ZN680_HUMAN;ZN737_HUMAN;ZN790_HUMAN;ZNF7_HUMAN;ZSC26_HUMAN	ZKSCAN2;ZKSCAN5;ZNF184;ZNF221;ZNF224;ZNF234;ZNF284;ZNF354A;ZNF354B;ZNF431;ZNF527;ZNF680;ZNF7;ZNF737;ZNF790;ZSCAN26	Zinc finger protein 354A	Color2 [A=255, R=169, G=169, B=169]	1	4		9.92277	12.1406	11.7783	11.1375	11.3157	11.0914	12.3631	11.6519	12.0725	9.85561	10.795	12.2541
O60765;Q96LW1	O60765;Q96LW1	Z354A_HUMAN;Z354B_HUMAN	ZNF354A;ZNF354B	Zinc finger protein 354A	Color2 [A=255, R=169, G=169, B=169]	1	4		11.3641	10.9254	12.2343	10.6114	10.5846	13.1678	13.3968	10.5579	11.4405	13.1631	14.4305	11.4541
O60779	O60779	S19A2_HUMAN	SLC19A2	Thiamine transporter 1	Color2 [A=255, R=169, G=169, B=169]	1	4		13.8275	14.6099	13.8384	14.2865	14.5778	14.5386	14.7666	14.85	14.532	14.7344	15.1109	14.2591
O60783	O60783	RT14_HUMAN	MRPS14	28S ribosomal protein S14, mitochondrial	Color2 [A=255, R=169, G=169, B=169]	1	4		19.508	18.3715	19.278	19.2164	19.1873	19.1588	19.2329	19.1581	19.1016	19.0054	18.7951	18.8795
O60814;P57053;P58876;P62807;Q5QNW6;Q8N257;Q93079;Q96A08;Q99877;Q99879	O60814;P06899;P23527;P33778;P57053;P58876;P62807;Q16778;Q5QNW6;Q8N257;Q93079;Q96A08;Q99877;Q99879;Q99880	H2B1A_HUMAN;H2B1C_HUMAN;H2B1D_HUMAN;H2B1H_HUMAN;H2B1K_HUMAN;H2B1M_HUMAN;H2B1N_HUMAN;H2B2F_HUMAN;H2B3B_HUMAN;H2BFS_HUMAN	H2BC1;H2BC10;H2BC12;H2BC12L;H2BC14;H2BC15;H2BC18;H2BC5;H2BC9;H2BU1	Histone H2B type 1-K	Color2 [A=255, R=169, G=169, B=169]	1	4		24.1812	23.3131	23.5541	23.3964	23.4682	22.9322	23.5687	23.7556	23.9697	23.5412	23.4387	24.1236
O60814;P57053;P58876;P62807;Q5QNW6;Q8N257;Q93079;Q99877;Q99879	O60814;P06899;P23527;P33778;P57053;P58876;P62807;Q16778;Q5QNW6;Q8N257;Q93079;Q99877;Q99879;Q99880	H2B1C_HUMAN;H2B1D_HUMAN;H2B1H_HUMAN;H2B1K_HUMAN;H2B1M_HUMAN;H2B1N_HUMAN;H2B2F_HUMAN;H2B3B_HUMAN;H2BFS_HUMAN	H2BC10;H2BC12;H2BC12L;H2BC14;H2BC15;H2BC18;H2BC5;H2BC9;H2BU1	Histone H2B type 1-K	Color2 [A=255, R=169, G=169, B=169]	1	4		22.7761	21.8988	22.5452	22.299	22.5484	22.279	22.6217	23.0337	22.5155	22.5728	22.4466	22.8982
O60814;P57053;P58876;P62807;Q5QNW6;Q93079;Q96A08;Q99877;Q99879	O60814;P06899;P23527;P33778;P57053;P58876;P62807;Q16778;Q5QNW6;Q93079;Q96A08;Q99877;Q99879;Q99880	H2B1A_HUMAN;H2B1C_HUMAN;H2B1D_HUMAN;H2B1H_HUMAN;H2B1K_HUMAN;H2B1M_HUMAN;H2B1N_HUMAN;H2B2F_HUMAN;H2BFS_HUMAN	H2BC1;H2BC10;H2BC12;H2BC12L;H2BC14;H2BC15;H2BC18;H2BC5;H2BC9	Histone H2B type 1-K	Color2 [A=255, R=169, G=169, B=169]	1	4		24.7338	24.1281	24.0818	23.9075	24.2005	24.0075	24.3135	24.9026	24.6732	24.0934	23.9699	24.2138
O60814;P57053;P58876;P62807;Q5QNW6;Q93079;Q99877;Q99879	O60814;P06899;P23527;P33778;P57053;P58876;P62807;Q16778;Q5QNW6;Q93079;Q99877;Q99879;Q99880	H2B1C_HUMAN;H2B1D_HUMAN;H2B1H_HUMAN;H2B1K_HUMAN;H2B1M_HUMAN;H2B1N_HUMAN;H2B2F_HUMAN;H2BFS_HUMAN	H2BC10;H2BC12;H2BC12L;H2BC14;H2BC15;H2BC18;H2BC5;H2BC9	Histone H2B type 1-K	Color2 [A=255, R=169, G=169, B=169]	1	4		24.4035	22.8954	23.5974	23.1082	23.7969	23.1201	23.8303	23.6379	23.0739	23.4652	23.5652	24.0006
O60825;P16118	O60825;P16118	F261_HUMAN;F262_HUMAN	PFKFB1;PFKFB2	6-phosphofructo-2-kinase/fructose-2,6-bisphosphatase 2	Color2 [A=255, R=169, G=169, B=169]	1	4		10.4659	10.4285	11.0265	10.6016	10.6614	10.85	10.9266	11.7411	11.7863	11.5995	11.8828	12.2905
O60825;P16118;Q16875	O60825;P16118;Q16875;Q16877	F261_HUMAN;F262_HUMAN;F263_HUMAN	PFKFB1;PFKFB2;PFKFB3	6-phosphofructo-2-kinase/fructose-2,6-bisphosphatase 2	Color2 [A=255, R=169, G=169, B=169]	1	4		14.2098	13.6604	13.1992	14.7942	13.4662	13.6204	14.067	13.3481	11.3255	11.1832	13.3573	13.0411
O60826	O60826	CCD22_HUMAN	CCDC22	Coiled-coil domain-containing protein 22	Color2 [A=255, R=169, G=169, B=169]	1	4		10.5064	13.6031	10.2664	12.6436	14.1203	13.5213	13.6353	12.8195	13.7136	13.7395	14.4664	14.2227
O60828	O60828	PQBP1_HUMAN	PQBP1	Polyglutamine-binding protein 1	Color2 [A=255, R=169, G=169, B=169]	1	4		16.5806	15.9941	16.3925	16.1332	16.2728	16.372	16.0029	16.0315	16.4386	16.3758	16.331	16.4142
O60830	O60830	TI17B_HUMAN	TIMM17B	Mitochondrial import inner membrane translocase subunit Tim17-B	Color2 [A=255, R=169, G=169, B=169]	1	4		15.8525	15.3661	15.226	15.3109	16.1167	14.8874	15.1498	14.4774	15.5284	16.0562	15.889	15.8541
O60831	O60831	PRAF2_HUMAN	PRAF2	PRA1 family protein 2	Color2 [A=255, R=169, G=169, B=169]	1	4		18.9096	19.1508	18.49	18.9978	18.9773	19.1791	18.9455	19.5456	19.2663	19.2941	18.9311	19.0497
O60832	O60832	DKC1_HUMAN	DKC1	H/ACA ribonucleoprotein complex subunit DKC1	Color2 [A=255, R=169, G=169, B=169]	1	4		19.7621	20.3098	20.1252	20.404	20.2486	20.3082	20.3879	20.4815	20.0047	20.6417	20.6835	20.9622
O60841	O60841	IF2P_HUMAN	EIF5B	Eukaryotic translation initiation factor 5B	Color2 [A=255, R=169, G=169, B=169]	1	4		16.3214	15.8346	16.2889	15.8203	16.1306	16.3855	16.235	16.7265	16.0319	16.941	17.1617	17.8031
O60858	O60858	TRI13_HUMAN	TRIM13	E3 ubiquitin-protein ligase TRIM13	Color2 [A=255, R=169, G=169, B=169]	1	4		15.1437	14.7098	14.4679	14.7025	14.5279	14.4766	14.41	15.1663	14.6672	15.3201	14.8295	14.4948
O60861	O60861	GAS7_HUMAN	GAS7	Growth arrest-specific protein 7	Color2 [A=255, R=169, G=169, B=169]	1	4		11.0978	12.9911	15.3699	13.7014	15.0025	14.2047	15.3106	16.0054	11.4413	14.8242	11.5634	12.0469
O60870	O60870	KIN17_HUMAN	KIN	DNA/RNA-binding protein KIN17	Color2 [A=255, R=169, G=169, B=169]	1	4		14.3445	15.1342	16.166	15.3255	15.3777	15.7818	14.4641	15.4598	15.429	15.655	15.7527	15.4485
O60879	O60879	DIAP2_HUMAN	DIAPH2	Protein diaphanous homolog 2	Color2 [A=255, R=169, G=169, B=169]	1	4		13.6765	13.6699	13.9427	13.1904	13.4837	14.0033	13.9594	13.708	12.9782	13.4027	13.7158	14.1456
O60884	O60884	DNJA2_HUMAN	DNAJA2	DnaJ homolog subfamily A member 2	Color2 [A=255, R=169, G=169, B=169]	1	4		18.7735	18.7459	18.8949	18.9602	18.7614	18.8558	19.0866	18.9923	18.5218	18.446	18.7274	18.9219
O60885	O60885	BRD4_HUMAN	BRD4	Bromodomain-containing protein 4	Color2 [A=255, R=169, G=169, B=169]	1	4		10.8629	12.7168	10.6947	12.2444	12.1632	13.4163	11.8881	11.7663	11.951	12.6277	13.2882	13.116
O60885;P25440	O60885;P25440	BRD2_HUMAN;BRD4_HUMAN	BRD2;BRD4	Bromodomain-containing protein 4	Color2 [A=255, R=169, G=169, B=169]	1	4		14.8601	14.8008	15.5267	15.1006	15.3176	15.0636	14.878	15.173	14.7974	15.5383	15.5156	14.9413
O60885;Q15059	O60885;Q15059	BRD3_HUMAN;BRD4_HUMAN	BRD3;BRD4	Bromodomain-containing protein 4	Color2 [A=255, R=169, G=169, B=169]	1	4		11.1239	12.5496	13.0075	13.4169	12.8964	13.1254	13.516	14.2281	13.0567	14.0822	13.8902	14.3131
O60894	O60894	RAMP1_HUMAN	RAMP1	Receptor activity-modifying protein 1	Color2 [A=255, R=169, G=169, B=169]	1	4		13.6884	14.1317	13.7195	13.2106	12.8648	12.4666	10.3978	13.2534	11.7641	12.4956	11.0209	10.9321
O60906	O60906	NSMA_HUMAN	SMPD2	Sphingomyelin phosphodiesterase 2	Color2 [A=255, R=169, G=169, B=169]	1	4		14.6552	14.7546	14.7217	14.8592	15.2887	15.1339	15.3225	14.9651	15.2734	15.1631	14.8069	15.3357
O60907	O60907	TBL1X_HUMAN	TBL1X	F-box-like/WD repeat-containing protein TBL1X	Color2 [A=255, R=169, G=169, B=169]	1	4		14.2465	14.8482	15.064	14.1957	15.5756	15.6855	15.3956	15.5063	15.186	15.4891	15.5277	15.1225
O60907;Q9BZK7	O60907;Q9BQ87;Q9BZK7	TBL1R_HUMAN;TBL1X_HUMAN	TBL1X;TBL1XR1	F-box-like/WD repeat-containing protein TBL1X	Color2 [A=255, R=169, G=169, B=169]	1	4		15.4073	16.0744	16.5248	16.2372	16.3885	16.4808	15.8866	16.4239	16.062	16.1913	16.2207	15.6219
O60909	O60909	B4GT2_HUMAN	B4GALT2	Beta-1,4-galactosyltransferase 2	Color2 [A=255, R=169, G=169, B=169]	1	4		14.8476	14.711	13.365	14.312	13.1407	14.5271	14.3705	13.8582	14.361	13.7828	13.7163	14.1074
O60911	O60911	CATL2_HUMAN	CTSV	Cathepsin L2	Color2 [A=255, R=169, G=169, B=169]	1	4		11.7534	13.7783	13.9106	13.6845	13.4083	11.596	13.2646	12.5151	12.9026	12.531	13.6868	12.9436
O60921	O60921	HUS1_HUMAN	HUS1	Checkpoint protein HUS1	Color2 [A=255, R=169, G=169, B=169]	1	4		14.3171	13.9541	14.2061	12.7265	11.8635	14.4369	13.5503	14.02	12.7857	14.2445	14.5225	15.1366
O60930	O60930	RNH1_HUMAN	RNASEH1	Ribonuclease H1	Color2 [A=255, R=169, G=169, B=169]	1	4		16.4248	16.1197	16.4212	16.2088	16.3623	16.0511	16.3698	16.3819	16.7843	16.7142	16.3637	16.8979
O60934	O60934	NBN_HUMAN	NBN	Nibrin	Color2 [A=255, R=169, G=169, B=169]	1	4		17.2174	17.6915	17.7965	17.674	17.6279	17.7294	17.517	17.0854	17.5516	17.8119	17.78	17.5494
O60941	O60941	DTNB_HUMAN	DTNB	Dystrobrevin beta	Color2 [A=255, R=169, G=169, B=169]	1	4		12.3511	13.6533	13.2368	12.7619	14.7378	15.0105	14.8481	14.4857	14.2686	14.8638	15.0795	14.3193
O60941;Q9Y4J8	O60941;Q9Y4J8	DTNA_HUMAN;DTNB_HUMAN	DTNA;DTNB	Dystrobrevin beta	Color2 [A=255, R=169, G=169, B=169]	1	4		14.2034	13.5242	14.1401	14.6284	15.2798	15.7413	15.349	15.3753	15.5362	16.4005	16.1825	16.5109
O60942	O60942	MCE1_HUMAN	RNGTT	mRNA-capping enzyme	Color2 [A=255, R=169, G=169, B=169]	1	4		13.3412	13.486	13.4873	13.7703	13.856	14.0105	13.6036	14.1554	14.1333	14.4039	14.331	14.5434
O75027	O75027	ABCB7_HUMAN	ABCB7	Iron-sulfur clusters transporter ABCB7, mitochondrial	Color2 [A=255, R=169, G=169, B=169]	1	4		20.2278	20.1008	20.0547	19.8489	19.8754	19.9744	20.0962	19.9944	19.8649	19.5899	19.5739	19.4435
O75030	O75030	MITF_HUMAN	MITF	Microphthalmia-associated transcription factor	Color2 [A=255, R=169, G=169, B=169]	1	4		10.8355	11.3256	11.6993	12.0896	12.4768	13.329	12.5249	13.3127	10.3595	12.2582	13.9923	12.3803
O75030;P19484;P19532	O14948;O75030;P19484;P19532	MITF_HUMAN;TFE3_HUMAN;TFEB_HUMAN	MITF;TFE3;TFEB	Microphthalmia-associated transcription factor	Color2 [A=255, R=169, G=169, B=169]	1	4		11.1799	12.8797	10.6286	12.5487	13.5313	14.7486	14.2957	13.4856	10.9023	12.8345	12.437	13.1771
O75030;P19532	O14948;O75030;P19532	MITF_HUMAN;TFE3_HUMAN	MITF;TFE3	Microphthalmia-associated transcription factor	Color2 [A=255, R=169, G=169, B=169]	1	4		11.18	11.831	11.1343	11.4675	12.3882	12.3335	12.6893	11.795	12.1763	13.5536	12.465	13.0276
O75037;Q2M1P5;Q7Z4S6;Q86VH2	O75037;Q2M1P5;Q7Z4S6;Q86VH2	KI21A_HUMAN;KI21B_HUMAN;KIF27_HUMAN;KIF7_HUMAN	KIF21A;KIF21B;KIF27;KIF7	Kinesin-like protein KIF21B	Color2 [A=255, R=169, G=169, B=169]	1	4		14.2398	14.5106	14.9218	15.0516	15.2008	15.566	15.56	14.4392	14.3958	15.8172	15.9782	15.684
O75037;Q7Z4S6	O75037;Q7Z4S6	KI21A_HUMAN;KI21B_HUMAN	KIF21A;KIF21B	Kinesin-like protein KIF21B	Color2 [A=255, R=169, G=169, B=169]	1	4		9.50925	11.2006	9.27215	11.3491	11.0346	10.4032	12.0116	11.1346	11.8971	12.0046	12.4139	12.5018
O75038;Q4KWH8	O75038;Q4KWH8	PLCH1_HUMAN;PLCH2_HUMAN	PLCH1;PLCH2	1-phosphatidylinositol 4,5-bisphosphate phosphodiesterase eta-2	Color2 [A=255, R=169, G=169, B=169]	1	4		12.9051	12.2881	12.5405	13.6706	12.7022	12.2565	13.4587	14.0623	11.8851	13.3828	13.6359	11.861
O75044	O75044;P0DJJ0;P0DMP2	SRGP2_HUMAN	SRGAP2	SLIT-ROBO Rho GTPase-activating protein 2	Color2 [A=255, R=169, G=169, B=169]	1	4		15.076	15.3671	15.3305	15.2825	15.3398	15.0614	14.9141	14.7723	15.9967	16.0659	15.6732	15.7645
O75044;Q7Z6B7	O75044;Q7Z6B7	SRGP1_HUMAN;SRGP2_HUMAN	SRGAP1;SRGAP2	SLIT-ROBO Rho GTPase-activating protein 2	Color2 [A=255, R=169, G=169, B=169]	1	4		13.8655	13.9218	14.5653	14.9594	13.5268	14.9354	14.3557	14.0812	14.2508	15.12	15.2049	14.8559
O75051	O75051	PLXA2_HUMAN	PLXNA2	Plexin-A2	Color2 [A=255, R=169, G=169, B=169]	1	4		10.2462	12.9529	13.278	12.8218	14.0568	13.677	13.4306	14.1787	14.0199	14.6387	14.6284	14.4255
O75051;P51805;Q9HCM2;Q9UIW2	O75051;P51805;Q9HCM2;Q9UIW2	PLXA1_HUMAN;PLXA2_HUMAN;PLXA3_HUMAN;PLXA4_HUMAN	PLXNA1;PLXNA2;PLXNA3;PLXNA4	Plexin-A2	Color2 [A=255, R=169, G=169, B=169]	1	4		15.1352	15.3624	15.2877	15.6297	15.7214	15.9595	15.9732	15.6492	15.826	16.1555	16.2867	16.0246
O75051;P51805;Q9UIW2	O75051;P51805;Q9UIW2	PLXA1_HUMAN;PLXA2_HUMAN;PLXA3_HUMAN	PLXNA1;PLXNA2;PLXNA3	Plexin-A2	Color2 [A=255, R=169, G=169, B=169]	1	4		14.3154	14.4135	14.2532	14.8359	14.2246	14.8892	14.8492	15.3072	14.9144	15.6304	14.5093	15.0893
O75051;Q9HCM2	O75051;Q9HCM2	PLXA2_HUMAN;PLXA4_HUMAN	PLXNA2;PLXNA4	Plexin-A2	Color2 [A=255, R=169, G=169, B=169]	1	4		13.4849	14.7633	14.5648	13.4473	15.5894	15.2731	15.7361	15.1872	15.4277	16.0626	15.5125	15.6199
O75051;Q9HCM2;Q9UIW2	O75051;Q9HCM2;Q9UIW2	PLXA1_HUMAN;PLXA2_HUMAN;PLXA4_HUMAN	PLXNA1;PLXNA2;PLXNA4	Plexin-A2	Color2 [A=255, R=169, G=169, B=169]	1	4		13.8448	14.9598	15.043	15.6915	14.0063	15.9777	16.4964	15.31	16.5962	16.6407	16.8946	16.9492
O75052	O75052	CAPON_HUMAN	NOS1AP	Carboxyl-terminal PDZ ligand of neuronal nitric oxide synthase protein	Color2 [A=255, R=169, G=169, B=169]	1	4		16.8769	16.669	16.9003	16.5098	17.1948	17.3238	17.0108	17.5542	17.1456	17.7273	17.5399	17.3484
O75054	O75054	IGSF3_HUMAN	IGSF3	Immunoglobulin superfamily member 3	Color2 [A=255, R=169, G=169, B=169]	1	4		15.1125	15.038	15.0281	15.1014	16.1563	15.942	16.0213	16.0981	15.8577	16.3177	16.3002	16.2868
O75061	O75061	AUXI_HUMAN	DNAJC6	Putative tyrosine-protein phosphatase auxilin	Color2 [A=255, R=169, G=169, B=169]	1	4		12.9691	14.1397	13.9376	14.4653	14.2988	14.0542	14.5344	14.1186	13.9486	14.7278	14.3052	14.2707
O75063	O75063	XYLK_HUMAN	FAM20B	Glycosaminoglycan xylosylkinase	Color2 [A=255, R=169, G=169, B=169]	1	4		16.1583	16.3156	15.86	16.2372	16.7292	15.8441	16.7912	16.5219	16.0071	16.3838	16.4029	16.2814
O75072	O75072	FKTN_HUMAN	FKTN	Ribitol-5-phosphate transferase FKTN	Color2 [A=255, R=169, G=169, B=169]	1	4		13.5481	14.178	14.4076	13.8612	13.9284	13.8017	13.4644	14.1847	12.2857	13.4073	13.0836	13.3842
O75074	O75074	LRP3_HUMAN	LRP3	Low-density lipoprotein receptor-related protein 3	Color2 [A=255, R=169, G=169, B=169]	1	4		10.7059	14.204	15.236	14.2482	15.1327	15.4814	14.972	15.2342	16.1346	15.4675	15.0737	14.4965
O75077	O75077	ADA23_HUMAN	ADAM23	Disintegrin and metalloproteinase domain-containing protein 23	Color2 [A=255, R=169, G=169, B=169]	1	4		14.6101	13.8634	14.0279	14.2204	14.2269	13.9721	14.2323	13.635	13.2552	13.5361	14.0436	13.6975
O75078	O75078	ADA11_HUMAN	ADAM11	Disintegrin and metalloproteinase domain-containing protein 11	Color2 [A=255, R=169, G=169, B=169]	1	4		13.4737	12.5262	12.0992	9.95824	13.2199	14.2069	13.9716	14.2409	11.3381	13.6261	13.5209	14.1684
O75081	O75081	MTG16_HUMAN	CBFA2T3	Protein CBFA2T3	Color2 [A=255, R=169, G=169, B=169]	1	4		12.0689	12.7462	13.91	13.6172	14.3034	14.3933	13.7818	13.8115	13.3149	14.284	14.248	14.2658
O75083	O75083	WDR1_HUMAN	WDR1	WD repeat-containing protein 1	Color2 [A=255, R=169, G=169, B=169]	1	4		14.7688	15.1819	14.816	14.8784	14.5848	15.2416	15.3718	15.3766	15.1833	15.6101	15.8205	15.8942
O75084	O75084	FZD7_HUMAN	FZD7	Frizzled-7	Color2 [A=255, R=169, G=169, B=169]	1	4		15.4424	14.7672	14.3286	15.6047	14.3154	13.9858	14.2769	14.7365	14.7155	14.9612	14.6801	14.6134
O75084;Q14332	O75084;Q14332	FZD2_HUMAN;FZD7_HUMAN	FZD2;FZD7	Frizzled-7	Color2 [A=255, R=169, G=169, B=169]	1	4		13.7342	10.8228	11.695	14.0066	13.476	10.4717	13.6584	12.9438	13.5068	13.0258	14.0718	11.8847
O75096	O75096	LRP4_HUMAN	LRP4	Low-density lipoprotein receptor-related protein 4	Color2 [A=255, R=169, G=169, B=169]	1	4		15.7134	15.3303	15.5957	15.7399	15.4486	15.5856	15.9275	16.0197	15.6928	15.5248	15.6971	15.7118
O75110	O75110	ATP9A_HUMAN	ATP9A	Probable phospholipid-transporting ATPase IIA	Color2 [A=255, R=169, G=169, B=169]	1	4		16.8052	17.0345	16.8567	17.0392	16.8938	16.6504	17.0436	16.9109	16.9495	16.9431	16.9035	16.9784
O75113	O75113	N4BP1_HUMAN	N4BP1	NEDD4-binding protein 1	Color2 [A=255, R=169, G=169, B=169]	1	4		14.7807	14.8553	15.0157	15.9025	14.4653	14.8212	14.8268	14.9098	15.1978	14.6463	13.1944	14.7804
O75116	O75116	ROCK2_HUMAN	ROCK2	Rho-associated protein kinase 2	Color2 [A=255, R=169, G=169, B=169]	1	4		10.968	13.4191	12.9976	12.5181	12.7103	13.2373	13.0984	12.1542	12.9503	13.8947	12.6121	14.2922
O75122	O75122	CLAP2_HUMAN	CLASP2	CLIP-associating protein 2	Color2 [A=255, R=169, G=169, B=169]	1	4		15.9639	15.7237	15.9477	16.0172	16.307	16.5891	16.5742	16.3191	15.9053	16.7566	16.5125	16.146
O75122;Q7Z460	O75122;Q7Z460	CLAP1_HUMAN;CLAP2_HUMAN	CLASP1;CLASP2	CLIP-associating protein 2	Color2 [A=255, R=169, G=169, B=169]	1	4		17.4918	17.5976	18.0934	17.5439	18.192	18.8537	18.5074	18.1835	17.5159	18.6437	18.2614	18.1292
O75123	O75123	ZN623_HUMAN	ZNF623	Zinc finger protein 623	Color2 [A=255, R=169, G=169, B=169]	1	4		14.5584	13.3939	12.9972	13.3289	13.451	14.0633	13.7697	13.5906	12.0407	13.2898	14.3064	14.1585
O75123;Q5TYW1	O75123;Q5TYW1;Q4V348	ZN623_HUMAN;ZN658_HUMAN	ZNF623;ZNF658	Zinc finger protein 623	Color2 [A=255, R=169, G=169, B=169]	1	4		9.28217	12.5879	9.65339	12.6595	10.8243	12.7571	10.9753	11.4101	10.476	12.8941	12.7947	13.2188
O75127	O75127	PTCD1_HUMAN	PTCD1	Pentatricopeptide repeat-containing protein 1, mitochondrial	Color2 [A=255, R=169, G=169, B=169]	1	4		22.2344	21.7075	21.8623	21.9651	21.915	21.685	21.8355	21.8572	21.9229	21.6466	21.3819	21.2801
O75128	O75128	COBL_HUMAN	COBL	Protein cordon-bleu	Color2 [A=255, R=169, G=169, B=169]	1	4		11.0361	9.94174	12.9757	12.9514	12.5669	13.2566	13.1049	12.5276	12.3792	12.5714	13.25	13.6962
O75129	O75129	ASTN2_HUMAN	ASTN2	Astrotactin-2	Color2 [A=255, R=169, G=169, B=169]	1	4		9.77016	10.3332	9.99312	11.5645	13.2528	14.0282	12.758	11.3227	14.0951	13.1314	13.6208	14.4713
O75131	O75131	CPNE3_HUMAN	CPNE3	Copine-3	Color2 [A=255, R=169, G=169, B=169]	1	4		15.8269	15.5047	15.8588	17.1099	16.3383	15.7269	16.0249	15.9224	15.9402	16.1382	16.4164	16.6243
O75131;Q96A23;Q96FN4;Q9HCH3;Q9UBL6	O75131;O95741;Q8IYJ1;Q96FN4;Q9HCH3;Q9UBL6;Q96A23;Q86YQ8	CPNE2_HUMAN;CPNE3_HUMAN;CPNE4_HUMAN;CPNE5_HUMAN;CPNE7_HUMAN	CPNE2;CPNE3;CPNE4;CPNE5;CPNE7	Copine-3	Color2 [A=255, R=169, G=169, B=169]	1	4		15.1314	16.1444	14.6474	16.776	16.1543	16.8758	16.8966	16.6797	16.7033	17.0638	17.7319	17.5414
O75132	O75132	ZBED4_HUMAN	ZBED4	Zinc finger BED domain-containing protein 4	Color2 [A=255, R=169, G=169, B=169]	1	4		14.6872	16.4415	16.506	16.2862	15.5433	17.1821	16.8189	16.9318	15.0624	17.1216	17.4759	17.1149
O75143	O75143	ATG13_HUMAN	ATG13	Autophagy-related protein 13	Color2 [A=255, R=169, G=169, B=169]	1	4		10.1627	12.1171	10.31	11.7466	10.8177	10.4233	10.8148	9.78286	11.5849	10.8064	12.1627	11.3615
O75145	O75145	LIPA3_HUMAN	PPFIA3	Liprin-alpha-3	Color2 [A=255, R=169, G=169, B=169]	1	4		13.1047	13.3544	14.4939	13.9282	15.0607	14.4039	14.0954	14.0406	14.6276	14.0445	13.5492	13.3028
O75145;O75334;Q13136	O75145;O75334;Q13136;O75335	LIPA1_HUMAN;LIPA2_HUMAN;LIPA3_HUMAN	PPFIA1;PPFIA2;PPFIA3	Liprin-alpha-3	Color2 [A=255, R=169, G=169, B=169]	1	4		14.0126	14.8117	13.9155	13.5927	14.8901	14.5132	14.9061	14.9817	14.8809	15.5709	15.8187	15.2012
O75145;Q13136	O75145;Q13136	LIPA1_HUMAN;LIPA3_HUMAN	PPFIA1;PPFIA3	Liprin-alpha-3	Color2 [A=255, R=169, G=169, B=169]	1	4		10.9542	11.4301	9.92001	11.3206	13.3416	13.1946	11.4613	12.3686	13.8644	13.0008	14.0653	13.6571
O75147	O75147	OBSL1_HUMAN	OBSL1	Obscurin-like protein 1	Color2 [A=255, R=169, G=169, B=169]	1	4		14.1752	14.0432	14.0876	14.1669	14.1168	15.0699	15.1496	14.9793	14.1649	15.1422	15.2274	15.0422
O75150	O75150	BRE1B_HUMAN	RNF40	E3 ubiquitin-protein ligase BRE1B	Color2 [A=255, R=169, G=169, B=169]	1	4		14.8847	15.5658	15.6302	15.6406	15.4531	15.8519	15.3722	15.1032	15.6037	15.952	15.8614	15.7079
O75150;Q5VTR2	O75150;Q5VTR2	BRE1A_HUMAN;BRE1B_HUMAN	RNF20;RNF40	E3 ubiquitin-protein ligase BRE1B	Color2 [A=255, R=169, G=169, B=169]	1	4		14.4307	14.9334	14.381	14.7879	14.6598	15.1019	14.7281	15.0008	14.7653	15.519	15.0642	14.7019
O75151	O75151	PHF2_HUMAN	PHF2	Lysine-specific demethylase PHF2	Color2 [A=255, R=169, G=169, B=169]	1	4		17.5901	18.5305	18.529	18.3456	17.641	18.5501	18.4723	18.5006	17.7975	18.6155	18.6506	18.4863
O75151;Q9UPP1	O75151;Q9UPP1	PHF2_HUMAN;PHF8_HUMAN	PHF2;PHF8	Lysine-specific demethylase PHF2	Color2 [A=255, R=169, G=169, B=169]	1	4		17.6089	18.8117	18.7672	18.8077	17.8623	18.7088	18.2829	18.483	17.6399	18.7264	18.5433	18.3427
O75152	O75152;A0A1B0GTU1	ZC11A_HUMAN	ZC3H11A	Zinc finger CCCH domain-containing protein 11A	Color2 [A=255, R=169, G=169, B=169]	1	4		17.408	17.4504	17.5893	17.3943	17.4683	17.7227	17.2174	17.2945	17.4935	17.7476	17.6022	17.595
O75153	O75153	CLU_HUMAN	CLUH	Clustered mitochondria protein homolog	Color2 [A=255, R=169, G=169, B=169]	1	4		14.9841	15.3711	15.27	15.6853	15.549	15.6509	15.6344	15.7789	14.902	15.7921	16.2354	16.5224
O75153;Q9Y5I4	O75153;Q9Y5I4	CLU_HUMAN;PCDC2_HUMAN	CLUH;PCDHAC2	Clustered mitochondria protein homolog	Color2 [A=255, R=169, G=169, B=169]	1	4		14.078	13.6913	9.69557	15.0768	14.24	14.7131	14.1162	14.2934	12.4431	14.4856	14.7463	14.7141
O75155	O75155	CAND2_HUMAN	CAND2	Cullin-associated NEDD8-dissociated protein 2	Color2 [A=255, R=169, G=169, B=169]	1	4		12.4328	11.7159	12.6376	12.8569	13.402	11.9161	13.513	13.4094	12.2201	13.4585	13.8557	13.93
O75155;Q86VP6	O75155;Q86VP6	CAND1_HUMAN;CAND2_HUMAN	CAND1;CAND2	Cullin-associated NEDD8-dissociated protein 2	Color2 [A=255, R=169, G=169, B=169]	1	4		10.6504	13.8648	14.6445	11.1967	14.3711	14.3634	13.1143	13.6267	10.1109	12.0634	13.3398	13.975
O75161	O75161	NPHP4_HUMAN	NPHP4	Nephrocystin-4	Color2 [A=255, R=169, G=169, B=169]	1	4		13.9655	14.0695	13.773	13.8707	14.4681	14.284	14.2937	13.9096	12.5631	15.0901	14.5485	14.2449
O75164	O75164	KDM4A_HUMAN	KDM4A	Lysine-specific demethylase 4A	Color2 [A=255, R=169, G=169, B=169]	1	4		13.7878	14.2616	13.4636	14.1929	13.9591	14.2102	14.1815	14.0462	13.1333	14.3824	14.3958	14.5386
O75164;O94953	O75164;O94953	KDM4A_HUMAN;KDM4B_HUMAN	KDM4A;KDM4B	Lysine-specific demethylase 4A	Color2 [A=255, R=169, G=169, B=169]	1	4		13.1364	13.2251	10.9393	12.5085	10.8001	12.2457	10.9913	12.3678	10.4594	12.764	10.4682	12.1579
O75165	O75165	DJC13_HUMAN	DNAJC13	DnaJ homolog subfamily C member 13	Color2 [A=255, R=169, G=169, B=169]	1	4		16.4996	16.784	16.5994	16.4898	16.778	17.0539	16.7993	16.8881	16.9142	16.6715	16.7268	16.6885
O75170	O75170	PP6R2_HUMAN	PPP6R2	Serine/threonine-protein phosphatase 6 regulatory subunit 2	Color2 [A=255, R=169, G=169, B=169]	1	4		18.8552	18.9784	18.9077	20.2728	18.0547	17.7135	19.4478	18.2908	17.731	16.0527	15.9565	14.0981
O75175	O75175	CNOT3_HUMAN	CNOT3	CCR4-NOT transcription complex subunit 3	Color2 [A=255, R=169, G=169, B=169]	1	4		14.1131	13.4623	13.4001	12.9605	13.759	13.4686	14.6421	14.2909	14.1307	15.3405	13.9449	14.9506
O75177	O75177	CREST_HUMAN	SS18L1	Calcium-responsive transactivator	Color2 [A=255, R=169, G=169, B=169]	1	4		13.0581	12.9643	13.5736	12.1273	12.5694	13.7937	13.3908	12.9245	12.5335	13.8705	14.0724	13.1685
O75179	O75179	ANR17_HUMAN	ANKRD17	Ankyrin repeat domain-containing protein 17	Color2 [A=255, R=169, G=169, B=169]	1	4		13.2494	14.0546	14.1002	13.9432	13.9329	14.2654	14.3949	14.5924	14.4101	14.1117	14.6764	15.0523
O75179;Q8IWZ3	O75179;Q8IWZ3	ANKH1_HUMAN;ANR17_HUMAN	ANKHD1;ANKRD17	Ankyrin repeat domain-containing protein 17	Color2 [A=255, R=169, G=169, B=169]	1	4		13.536	13.9731	14.3271	13.944	14.4092	13.9012	14.1771	14.2021	13.4829	14.6556	14.5591	14.7099
O75182	O75182	SIN3B_HUMAN	SIN3B	Paired amphipathic helix protein Sin3b	Color2 [A=255, R=169, G=169, B=169]	1	4		15.0342	16.152	16.1793	16.1699	15.9952	16.7153	16.5835	16.4994	15.7711	16.8784	16.9996	16.7408
O75190	O75190	DNJB6_HUMAN	DNAJB6	DnaJ homolog subfamily B member 6	Color2 [A=255, R=169, G=169, B=169]	1	4		16.4278	16.7176	17.1593	17.4266	17.1019	17.3538	17.5932	17.2274	16.7689	17.169	17.2271	17.2366
O75190;P25686	O75190;P25686;Q8NHS0	DNJB2_HUMAN;DNJB6_HUMAN	DNAJB2;DNAJB6	DnaJ homolog subfamily B member 6	Color2 [A=255, R=169, G=169, B=169]	1	4		15.5604	14.2945	14.7111	15.0825	15.972	14.8504	13.7098	16.2857	14.9747	13.284	12.5888	15.2689
O75197	O75197	LRP5_HUMAN	LRP5	Low-density lipoprotein receptor-related protein 5	Color2 [A=255, R=169, G=169, B=169]	1	4		13.8868	14.3626	13.639	14.4753	14.2946	14.5388	14.5371	14.7437	14.5774	14.3115	14.3061	14.3027
O75197;O75581	O75197;O75581	LRP5_HUMAN;LRP6_HUMAN	LRP5;LRP6	Low-density lipoprotein receptor-related protein 5	Color2 [A=255, R=169, G=169, B=169]	1	4		13.105	13.9217	11.1097	10.6784	11.7837	13.5549	13.6842	13.5759	11.9159	13.0832	12.5765	12.2089
O75208	O75208	COQ9_HUMAN	COQ9	Ubiquinone biosynthesis protein COQ9, mitochondrial	Color2 [A=255, R=169, G=169, B=169]	1	4		15.4512	15.2716	15.2987	15.3274	15.5691	15.3209	15.7707	15.4564	14.9431	15.122	15.0933	15.2515
O75223	O75223	GGCT_HUMAN	GGCT	Gamma-glutamylcyclotransferase	Color2 [A=255, R=169, G=169, B=169]	1	4		15.3678	16.5582	15.6205	18.0536	16.5764	14.3834	14.8575	15.052	15.1127	14.3731	15.59	14.8813
O75251	O75251	NDUS7_HUMAN	NDUFS7	NADH dehydrogenase [ubiquinone] iron-sulfur protein 7, mitochondrial	Color2 [A=255, R=169, G=169, B=169]	1	4		22.0298	21.8845	21.8453	21.7596	21.8948	21.5741	21.7719	21.9756	21.9247	21.4007	21.1842	21.0149
O75290	O75290	Z780A_HUMAN	ZNF780A	Zinc finger protein 780A	Color2 [A=255, R=169, G=169, B=169]	1	4		12.3193	13.4292	12.429	13.2653	12.1551	14.3211	11.9678	10.4361	12.8193	13.5149	12.9219	12.7998
O75306	O75306	NDUS2_HUMAN	NDUFS2	NADH dehydrogenase [ubiquinone] iron-sulfur protein 2, mitochondrial	Color2 [A=255, R=169, G=169, B=169]	1	4		22.7976	22.4606	22.4774	22.5082	22.4931	22.2655	22.4502	22.4043	22.3894	21.7707	21.6369	21.4821
O75312	O75312	ZPR1_HUMAN	ZPR1	Zinc finger protein ZPR1	Color2 [A=255, R=169, G=169, B=169]	1	4		11.8014	11.2958	10.5096	10.7219	11.0029	11.86	9.79598	12.539	11.2792	12.5934	12.9142	12.7547
O75319	O75319	DUS11_HUMAN	DUSP11	RNA/RNP complex-1-interacting phosphatase	Color2 [A=255, R=169, G=169, B=169]	1	4		19.1601	19.1128	19.235	18.9979	18.9422	18.7747	19.0114	18.8921	18.9858	19.101	18.8683	18.7807
O75323	O75323	NIPS2_HUMAN	NIPSNAP2	Protein NipSnap homolog 2	Color2 [A=255, R=169, G=169, B=169]	1	4		24.8696	24.567	24.6375	24.6309	24.5302	24.3298	24.5125	24.5466	24.5834	23.9686	23.7716	23.5519
O75323;Q9BPW8	O75323;Q9BPW8	NIPS1_HUMAN;NIPS2_HUMAN	NIPSNAP1;NIPSNAP2	Protein NipSnap homolog 2	Color2 [A=255, R=169, G=169, B=169]	1	4		21.9467	21.9177	21.7417	21.4462	21.5169	21.3157	21.6675	21.8327	21.5935	20.5299	20.1756	18.9494
O75324	O75324	SNN_HUMAN	SNN	Stannin	Color2 [A=255, R=169, G=169, B=169]	1	4		12.7954	12.4651	10.0762	13.5237	10.1424	13.6687	13.6037	13.8592	12.7731	14.5282	13.5035	12.4483
O75330	O75330	HMMR_HUMAN	HMMR	Hyaluronan mediated motility receptor	Color2 [A=255, R=169, G=169, B=169]	1	4		10.3472	11.1486	10.912	10.6778	12.1638	11.0855	11.0767	10.0574	10.3464	11.2842	10.9146	10.7661
O75334	O75334	LIPA2_HUMAN	PPFIA2	Liprin-alpha-2	Color2 [A=255, R=169, G=169, B=169]	1	4		15.2003	15.3345	15.0885	14.8702	14.9587	14.9065	14.4838	14.7467	14.6055	15.1369	15.5515	14.4554
O75334;Q13136	O75334;Q13136;O75335	LIPA1_HUMAN;LIPA2_HUMAN	PPFIA1;PPFIA2	Liprin-alpha-2	Color2 [A=255, R=169, G=169, B=169]	1	4		8.46746	13.2131	11.6253	11.4352	12.7986	12.9302	14.173	14.5888	14.3436	13.935	13.9742	13.8436
O75340	O75340	PDCD6_HUMAN	PDCD6	Programmed cell death protein 6	Color2 [A=255, R=169, G=169, B=169]	1	4		16.587	16.979	16.9224	17.3912	17.749	17.5835	18.0072	17.936	17.2397	17.7025	17.6145	17.5596
O75342	O75342	LX12B_HUMAN	ALOX12B	Arachidonate 12-lipoxygenase, 12R-type	Color2 [A=255, R=169, G=169, B=169]	1	4		16.5749	17.0564	16.9035	17.9403	16.8232	16.0982	16.1341	16.3402	17.0661	15.6597	16.5671	16.3368
O75346	O75346	ZN253_HUMAN	ZNF253	Zinc finger protein 253	Color2 [A=255, R=169, G=169, B=169]	1	4		10.5665	10.72	13.1674	12.5677	11.3088	9.62664	10.4533	11.8452	11.2705	11.2772	11.9798	11.7639
O75346;O75373;P35789;Q5JVG8;Q6ZN08	P35789;O75346;Q68DY1;O75373;Q5JVG8;Q6ZN08	ZN253_HUMAN;ZN506_HUMAN;ZN737_HUMAN;ZNF66_HUMAN;ZNF93_HUMAN	ZNF253;ZNF506;ZNF66;ZNF737;ZNF93	Zinc finger protein 253	Color2 [A=255, R=169, G=169, B=169]	1	4		10.8295	11.5547	11.781	11.8527	10.0808	13.8052	11.6886	12.7251	11.8296	13.5983	13.6371	9.61397
O75346;P35789	P35789;O75346	ZN253_HUMAN;ZNF93_HUMAN	ZNF253;ZNF93	Zinc finger protein 253	Color2 [A=255, R=169, G=169, B=169]	1	4		12.4637	14.1258	13.6743	14.5155	10.2177	14.1144	14.1571	13.4528	13.8431	13.6978	14.0465	13.5622
O75347	O75347	TBCA_HUMAN	TBCA	Tubulin-specific chaperone A	Color2 [A=255, R=169, G=169, B=169]	1	4		11.6488	11.0203	10.7235	9.35255	11.0857	9.1477	11.4845	11.5113	9.84077	10.8675	12.6755	12.5378
O75348	O75348	VATG1_HUMAN	ATP6V1G1	V-type proton ATPase subunit G 1	Color2 [A=255, R=169, G=169, B=169]	1	4		16.4067	16.9608	16.4895	16.7129	18.0681	18.2317	17.8248	17.8573	16.9613	17.3217	17.1108	17.3327
O75351	O75351	VPS4B_HUMAN	VPS4B	Vacuolar protein sorting-associated protein 4B	Color2 [A=255, R=169, G=169, B=169]	1	4		11.5323	13.417	13.3204	13.3425	12.0441	12.0369	13.5732	14.1172	13.9623	14.6514	14.4275	14.831
O75351;Q6PIW4;Q9UN37	O75351;Q6PIW4;Q9UN37	FIGL1_HUMAN;VPS4A_HUMAN;VPS4B_HUMAN	FIGNL1;VPS4A;VPS4B	Vacuolar protein sorting-associated protein 4B	Color2 [A=255, R=169, G=169, B=169]	1	4		16.4778	15.7894	16.4507	16.674	16.4831	16.9408	16.9129	16.8393	16.3195	17.2481	17.3253	17.3588
O75351;Q9UN37	O75351;Q9UN37	VPS4A_HUMAN;VPS4B_HUMAN	VPS4A;VPS4B	Vacuolar protein sorting-associated protein 4B	Color2 [A=255, R=169, G=169, B=169]	1	4		12.8115	12.7476	12.782	13.4759	12.1049	12.5436	13.0898	13.271	12.7127	14.0133	12.0569	13.4761
O75352	O75352	MPU1_HUMAN	MPDU1	Mannose-P-dolichol utilization defect 1 protein	Color2 [A=255, R=169, G=169, B=169]	1	4		20.0469	20.3785	20.2058	20.4073	20.2806	20.2023	20.34	20.6147	20.1949	20.0878	19.975	19.8873
O75354	O75354	ENTP6_HUMAN	ENTPD6	Ectonucleoside triphosphate diphosphohydrolase 6	Color2 [A=255, R=169, G=169, B=169]	1	4		14.2623	14.2458	14.6135	15.0105	14.5136	14.7026	15.0688	14.8926	15.0751	14.5625	14.8014	13.9633
O75356	O75356	ENTP5_HUMAN	ENTPD5	Nucleoside diphosphate phosphatase ENTPD5	Color2 [A=255, R=169, G=169, B=169]	1	4		11.3709	10.1785	10.7035	10.2467	12.4467	12.4066	13.0272	12.5873	12.5309	13.6514	13.9421	13.858
O75362	O75362	ZN217_HUMAN	ZNF217	Zinc finger protein 217	Color2 [A=255, R=169, G=169, B=169]	1	4		13.6535	14.4086	14.3578	14.7662	14.2058	15.6126	15.3969	14.7802	14.2242	15.7438	15.5326	15.3586
O75365	O75365	TP4A3_HUMAN	PTP4A3	Protein tyrosine phosphatase type IVA 3	Color2 [A=255, R=169, G=169, B=169]	1	4		13.7354	14.2149	13.702	14.3892	12.7875	12.7587	13.7062	14.5431	9.96483	14.1418	13.1573	13.1618
O75367	O75367	H2AY_HUMAN	MACROH2A1	Core histone macro-H2A.1	Color2 [A=255, R=169, G=169, B=169]	1	4		21.2112	21.6857	21.483	21.5904	21.6705	21.6589	21.5073	21.8149	21.4634	21.5526	21.6661	21.6918
O75367;Q9P0M6	O75367;Q9P0M6	H2AW_HUMAN;H2AY_HUMAN	MACROH2A1;MACROH2A2	Core histone macro-H2A.1	Color2 [A=255, R=169, G=169, B=169]	1	4		21.7865	21.9788	21.9145	21.9359	22.2304	22.1755	22.1889	22.4957	22.3526	22.2342	22.4344	22.2787
O75369	O75369	FLNB_HUMAN	FLNB	Filamin-B	Color2 [A=255, R=169, G=169, B=169]	1	4		14.6042	14.827	14.7423	15.3674	15.1735	15.4856	15.3627	15.0841	15.4128	15.8747	15.757	15.9379
O75369;P21333	O75369;P21333	FLNA_HUMAN;FLNB_HUMAN	FLNA;FLNB	Filamin-B	Color2 [A=255, R=169, G=169, B=169]	1	4		17.6465	16.1124	14.787	12.0134	11.4588	13.04	13.4174	13.6415	12.627	11.8827	12.7592	12.1529
O75369;P21333;Q14315	O75369;P21333;Q14315	FLNA_HUMAN;FLNB_HUMAN;FLNC_HUMAN	FLNA;FLNB;FLNC	Filamin-B	Color2 [A=255, R=169, G=169, B=169]	1	4		16.8738	16.328	16.943	16.9991	16.8988	17.0214	17.0317	16.9746	17.2352	17.5103	17.7874	18.0073
O75373;Q8IYN0;Q9H8G1	O75373;Q03924;Q8IYN0;Q9H8G1;Q6ZMV8	ZN100_HUMAN;ZN430_HUMAN;ZN737_HUMAN	ZNF100;ZNF430;ZNF737	Zinc finger protein 737	Color2 [A=255, R=169, G=169, B=169]	1	4		14.6316	14.0661	10.2854	12.1329	14.9787	13.8988	10.9156	14.98	15.1998	10.7712	15.0452	13.6197
O75376	O75376	NCOR1_HUMAN	NCOR1	Nuclear receptor corepressor 1	Color2 [A=255, R=169, G=169, B=169]	1	4		15.3221	16.4833	16.4079	16.3968	15.6503	16.9089	16.4131	16.2653	15.3451	16.6531	16.7933	16.5629
O75376;Q9Y618	O75376;Q9Y618	NCOR1_HUMAN;NCOR2_HUMAN	NCOR1;NCOR2	Nuclear receptor corepressor 1	Color2 [A=255, R=169, G=169, B=169]	1	4		14.2783	14.8931	14.7466	15.4306	14.9714	15.5211	15.1973	15.1827	14.6162	14.9165	15.3169	13.2842
O75380	O75380	NDUS6_HUMAN	NDUFS6	NADH dehydrogenase [ubiquinone] iron-sulfur protein 6, mitochondrial	Color2 [A=255, R=169, G=169, B=169]	1	4		18.7935	18.1859	18.6089	18.656	18.6642	18.4248	18.5654	18.4835	19.0585	18.647	18.7016	18.6133
O75381	O75381	PEX14_HUMAN	PEX14	Peroxisomal membrane protein PEX14	Color2 [A=255, R=169, G=169, B=169]	1	4		17.2803	17.1977	17.693	17.5078	17.9968	18.3804	17.7426	17.7731	18.3357	18.6664	18.4001	18.4984
O75382	O75382	TRIM3_HUMAN	TRIM3	Tripartite motif-containing protein 3	Color2 [A=255, R=169, G=169, B=169]	1	4		12.3969	12.4346	13.6949	11.9005	10.2564	13.7697	13.9935	12.4686	13.2403	13.6428	13.3262	13.543
O75385	O75385	ULK1_HUMAN	ULK1	Serine/threonine-protein kinase ULK1	Color2 [A=255, R=169, G=169, B=169]	1	4		15.2914	16.0893	15.9228	15.0868	15.1829	11.3227	16.7697	17.3273	16.4517	15.7169	16.1387	16.9262
O75386	O75386	TULP3_HUMAN	TULP3	Tubby-related protein 3	Color2 [A=255, R=169, G=169, B=169]	1	4		14.9388	15.8709	15.7475	15.8492	15.3617	15.3985	15.2605	15.2161	14.5649	15.5812	15.6278	15.5069
O75387	O75387	LAT3_HUMAN	SLC43A1	Large neutral amino acids transporter small subunit 3	Color2 [A=255, R=169, G=169, B=169]	1	4		14.7732	14.5772	15.2796	14.6689	14.8839	14.6354	14.6515	15.3976	14.7455	14.6466	15.0378	14.4298
O75390	O75390	CISY_HUMAN	CS	Citrate synthase, mitochondrial	Color2 [A=255, R=169, G=169, B=169]	1	4		22.7263	22.5714	22.6092	22.7047	22.6244	22.3371	22.688	22.6566	22.4985	22.349	22.1494	22.16
O75394	O75394	RM33_HUMAN	MRPL33	39S ribosomal protein L33, mitochondrial	Color2 [A=255, R=169, G=169, B=169]	1	4		20.2746	19.8935	20.0524	20.0544	19.7536	19.7974	19.9322	19.9436	20.1039	19.723	19.7518	19.5295
O75396	O75396	SC22B_HUMAN	SEC22B	Vesicle-trafficking protein SEC22b	Color2 [A=255, R=169, G=169, B=169]	1	4		19.7254	19.7533	19.7629	19.7816	20.0232	19.8105	19.7865	19.9096	20.0119	19.9411	20.039	19.8572
O75398	O75398	DEAF1_HUMAN	DEAF1	Deformed epidermal autoregulatory factor 1 homolog	Color2 [A=255, R=169, G=169, B=169]	1	4		14.6413	14.4527	13.5539	15.332	15.1005	15.1506	14.6314	15.2171	13.8091	15.728	15.9039	14.8224
O75400	O75400	PR40A_HUMAN	PRPF40A	Pre-mRNA-processing factor 40 homolog A	Color2 [A=255, R=169, G=169, B=169]	1	4		19.9486	19.722	19.6741	20.0295	20.0878	19.9536	19.8233	19.8069	20.0947	20.1656	20.0247	19.8947
O75400;Q6NWY9	O75400;Q6NWY9	PR40A_HUMAN;PR40B_HUMAN	PRPF40A;PRPF40B	Pre-mRNA-processing factor 40 homolog A	Color2 [A=255, R=169, G=169, B=169]	1	4		14.9699	13.4724	14.0788	14.0999	13.9985	14.2035	14.446	14.4587	13.6151	14.4215	14.2094	13.6419
O75410	O75410	TACC1_HUMAN	TACC1	Transforming acidic coiled-coil-containing protein 1	Color2 [A=255, R=169, G=169, B=169]	1	4		14.5246	13.9628	14.1351	14.7527	14.6354	14.6943	14.8146	14.8786	14.8056	14.9519	14.3159	14.2763
O75414	O75414	NDK6_HUMAN	NME6	Nucleoside diphosphate kinase 6	Color2 [A=255, R=169, G=169, B=169]	1	4		17.1528	16.8683	16.7301	17.2144	17.1701	16.7777	16.6087	16.9414	17.4372	17.0562	16.7587	16.6544
O75419	O75419	CDC45_HUMAN	CDC45	Cell division control protein 45 homolog	Color2 [A=255, R=169, G=169, B=169]	1	4		12.4788	13.9577	13.9435	13.971	12.4172	14.0067	13.4909	13.6278	13.0707	13.1818	13.8906	14.2128
O75420	O75420	GGYF1_HUMAN	GIGYF1	GRB10-interacting GYF protein 1	Color2 [A=255, R=169, G=169, B=169]	1	4		14.2667	13.7766	9.24317	14.1466	14.2385	14.0543	14.4583	14.1522	13.257	12.8387	14.9204	14.6034
O75425	O75425	MSPD3_HUMAN	MOSPD3	Motile sperm domain-containing protein 3	Color2 [A=255, R=169, G=169, B=169]	1	4		13.8861	15.0454	15.0232	14.9995	15.4146	15.8128	15.5237	15.6105	15.5488	15.5061	15.5597	15.417
O75427	O75427	LRCH4_HUMAN	LRCH4	Leucine-rich repeat and calponin homology domain-containing protein 4	Color2 [A=255, R=169, G=169, B=169]	1	4		16.4538	16.2066	16.2767	16.5191	16.9232	16.9744	16.6834	16.6733	17.2299	16.9738	17.0766	16.9233
O75431	O75431	MTX2_HUMAN	MTX2	Metaxin-2	Color2 [A=255, R=169, G=169, B=169]	1	4		19.9501	19.8278	19.9998	20.133	19.9857	19.9908	19.9895	19.9046	19.8585	19.9262	19.7855	19.7669
O75436	O75436	VP26A_HUMAN	VPS26A	Vacuolar protein sorting-associated protein 26A	Color2 [A=255, R=169, G=169, B=169]	1	4		13.7788	13.3447	14.7817	15.8312	14.7497	14.3719	14.5513	13.8711	15.0664	13.8265	14.023	13.4377
O75436;Q4G0F5	O75436;Q4G0F5	VP26A_HUMAN;VP26B_HUMAN	VPS26A;VPS26B	Vacuolar protein sorting-associated protein 26A	Color2 [A=255, R=169, G=169, B=169]	1	4		11.555	13.1166	13.2892	14.3101	11.6305	13.4775	13.2254	13.2981	12.7947	12.5399	13.1958	13.3695
O75438	O75438	NDUB1_HUMAN	NDUFB1	NADH dehydrogenase [ubiquinone] 1 beta subcomplex subunit 1	Color2 [A=255, R=169, G=169, B=169]	1	4		17.8077	17.8344	17.5305	18.3292	18.1429	17.2297	17.6576	17.8918	17.6248	17.6732	17.5366	18.0733
O75439	O75439	MPPB_HUMAN	PMPCB	Mitochondrial-processing peptidase subunit beta	Color2 [A=255, R=169, G=169, B=169]	1	4		22.7397	22.5716	22.6637	22.6718	22.798	22.6837	22.621	22.6717	22.7494	22.498	22.4509	22.3931
O75439;P31930	O75439;P31930	MPPB_HUMAN;QCR1_HUMAN	PMPCB;UQCRC1	Mitochondrial-processing peptidase subunit beta	Color2 [A=255, R=169, G=169, B=169]	1	4		14.0922	16.3193	17.4572	15.5724	16.7156	16.2746	16.9929	15.82	17.88	16.2018	15.7531	15.2951
O75446	O75446	SAP30_HUMAN	SAP30	Histone deacetylase complex subunit SAP30	Color2 [A=255, R=169, G=169, B=169]	1	4		17.0623	17.4535	17.5639	17.6974	17.0881	17.3768	17.5747	17.3794	17.5908	17.4111	17.4427	17.2424
O75448	O75448	MED24_HUMAN	MED24	Mediator of RNA polymerase II transcription subunit 24	Color2 [A=255, R=169, G=169, B=169]	1	4		17.5307	17.183	17.1482	17.526	17.3871	17.5366	17.4625	17.5801	17.7765	17.6035	17.7212	17.4529
O75449	O75449	KTNA1_HUMAN	KATNA1	Katanin p60 ATPase-containing subunit A1	Color2 [A=255, R=169, G=169, B=169]	1	4		13.1705	14.1579	13.9247	13.9262	12.9495	13.8086	13.5451	14.3183	12.5207	14.1773	14.107	14.9423
O75460	O75460	ERN1_HUMAN	ERN1	Serine/threonine-protein kinase/endoribonuclease IRE1	Color2 [A=255, R=169, G=169, B=169]	1	4		14.813	15.2211	14.9561	15.0924	15.3407	15.3247	15.4268	15.3986	15.5005	15.7537	15.4695	15.6892
O75461	O75461	E2F6_HUMAN	E2F6	Transcription factor E2F6	Color2 [A=255, R=169, G=169, B=169]	1	4		15.9405	17.8305	17.9525	17.9177	16.2867	18.3485	17.8858	17.6746	16.369	17.9285	17.9211	17.4195
O75462	O75462	CRLF1_HUMAN	CRLF1	Cytokine receptor-like factor 1	Color2 [A=255, R=169, G=169, B=169]	1	4		10.5934	11.5707	11.4432	9.95237	13.5071	13.6266	13.4916	13.9378	14.3221	15.0703	14.9582	15.0486
O75467	O75467	Z324A_HUMAN	ZNF324	Zinc finger protein 324A	Color2 [A=255, R=169, G=169, B=169]	1	4		12.7878	14.293	13.2544	14.0024	13.373	13.1479	13.2376	14.0112	12.5	14.1813	13.9229	13.7042
O75467;Q6AW86	O75467;Q6AW86	Z324A_HUMAN;Z324B_HUMAN	ZNF324;ZNF324B	Zinc finger protein 324A	Color2 [A=255, R=169, G=169, B=169]	1	4		14.4698	15.4295	15.5967	15.6809	13.9815	15.6081	15.6523	15.4617	14.7533	15.7636	15.7043	15.6331
O75475	O75475	PSIP1_HUMAN	PSIP1	PC4 and SFRS1-interacting protein	Color2 [A=255, R=169, G=169, B=169]	1	4		19.9415	19.798	20.0305	19.987	19.5593	19.891	19.7731	19.8738	19.6753	20.1166	20.2293	20.3147
O75475;P51858;Q7Z4V5;Q9Y3E1	O75475;P51858;Q7Z4V5;Q9Y3E1	HDGF_HUMAN;HDGR2_HUMAN;HDGR3_HUMAN;PSIP1_HUMAN	HDGF;HDGFL2;HDGFL3;PSIP1	PC4 and SFRS1-interacting protein	Color2 [A=255, R=169, G=169, B=169]	1	4		13.7787	15.7746	13.4614	14.4382	16.3606	16.3178	15.0242	13.6857	10.9167	16.5062	15.8942	16.2488
O75477	O75477	ERLN1_HUMAN	ERLIN1	Erlin-1	Color2 [A=255, R=169, G=169, B=169]	1	4		18.4398	18.6249	18.4435	18.4217	18.2445	18.4385	18.411	18.4964	18.4121	18.227	18.1389	17.7733
O75477;O94905	O75477;O94905	ERLN1_HUMAN;ERLN2_HUMAN	ERLIN1;ERLIN2	Erlin-1	Color2 [A=255, R=169, G=169, B=169]	1	4		18.9478	18.9523	18.9405	18.8154	19.0969	17.9341	19.0062	19.2135	19.2286	18.6779	18.9975	18.8316
O75478	O75478	TAD2A_HUMAN	TADA2A	Transcriptional adapter 2-alpha	Color2 [A=255, R=169, G=169, B=169]	1	4		15.0755	15.118	14.9602	15.3714	14.0536	15.5412	15.6586	15.0095	14.4346	15.4515	15.5429	15.2738
O75486	O75486	SUPT3_HUMAN	SUPT3H	Transcription initiation protein SPT3 homolog	Color2 [A=255, R=169, G=169, B=169]	1	4		13.7839	14.2626	15.7038	15.8232	14.9871	15.4505	15.6543	15.1661	14.7675	15.4909	16.2228	15.8749
O75487	O75487	GPC4_HUMAN	GPC4	Glypican-4	Color2 [A=255, R=169, G=169, B=169]	1	4		8.67092	9.22481	15.1055	12.115	13.9683	13.9574	13.9741	14.1708	14.885	15.4716	15.5315	15.7036
O75489	O75489	NDUS3_HUMAN	NDUFS3	NADH dehydrogenase [ubiquinone] iron-sulfur protein 3, mitochondrial	Color2 [A=255, R=169, G=169, B=169]	1	4		22.7253	22.3403	22.4785	22.5195	22.3995	22.2187	22.3134	22.2698	22.4547	22.0117	21.8748	21.7914
O75494	O75494	SRS10_HUMAN	SRSF10	Serine/arginine-rich splicing factor 10	Color2 [A=255, R=169, G=169, B=169]	1	4		20.1979	20.5859	20.7099	20.7153	20.3986	20.4516	20.3564	20.4199	20.1767	20.7786	20.5236	20.6376
O75494;Q8WXF0	O75494;Q8WXF0	SRS10_HUMAN;SRS12_HUMAN	SRSF10;SRSF12	Serine/arginine-rich splicing factor 10	Color2 [A=255, R=169, G=169, B=169]	1	4		18.8796	19.1635	19.1453	19.3292	18.7804	19.1303	19.1337	19.1867	18.4767	19.2986	19.2431	19.2255
O75509	O75509	TNR21_HUMAN	TNFRSF21	Tumor necrosis factor receptor superfamily member 21	Color2 [A=255, R=169, G=169, B=169]	1	4		10.7734	11.7926	10.7186	11.5449	10.6609	12.5969	8.34928	10.9371	10.9461	11.4624	12.1524	11.9515
O75521	O75521	ECI2_HUMAN	ECI2	Enoyl-CoA delta isomerase 2	Color2 [A=255, R=169, G=169, B=169]	1	4		18.901	18.575	18.6408	18.8447	19.0781	18.8982	19.089	18.8913	18.8469	19.0586	18.9598	18.9814
O75525	O75525	KHDR3_HUMAN	KHDRBS3	KH domain-containing, RNA-binding, signal transduction-associated protein 3	Color2 [A=255, R=169, G=169, B=169]	1	4		15.3233	15.5364	15.8601	16.3079	16.3492	16.3406	16.5253	16.1617	16.1592	16.7406	16.681	16.7363
O75525;Q07666	O75525;Q07666;Q5VWX1	KHDR1_HUMAN;KHDR3_HUMAN	KHDRBS1;KHDRBS3	KH domain-containing, RNA-binding, signal transduction-associated protein 3	Color2 [A=255, R=169, G=169, B=169]	1	4		18.8339	18.8763	18.829	19.475	19.2466	18.9201	19.1372	18.9824	18.8809	19.4564	19.3458	19.1011
O75528	O75528	TADA3_HUMAN	TADA3	Transcriptional adapter 3	Color2 [A=255, R=169, G=169, B=169]	1	4		14.2774	13.9017	15.0325	14.2126	14.2189	14.9328	14.8223	14.5553	13.7842	14.7608	15.463	14.5635
O75529	O75529	TAF5L_HUMAN	TAF5L	TAF5-like RNA polymerase II p300/CBP-associated factor-associated factor 65 kDa subunit 5L	Color2 [A=255, R=169, G=169, B=169]	1	4		14.9066	16.0681	15.7773	16.0022	15.4921	16.6792	16.4109	16.1155	14.9405	16.4045	16.4704	16.4907
O75530	O75530	EED_HUMAN	EED	Polycomb protein EED	Color2 [A=255, R=169, G=169, B=169]	1	4		17.2662	22.4716	22.604	22.4189	17.6472	22.789	22.3935	22.1113	17.0121	21.8532	21.9676	21.595
O75531	O75531	BAF_HUMAN	BANF1	Barrier-to-autointegration factor	Color2 [A=255, R=169, G=169, B=169]	1	4		18.4337	18.1058	18.514	18.2051	18.8161	18.4603	18.6503	19.2435	18.7951	18.3473	18.6915	19.3297
O75533	O75533	SF3B1_HUMAN	SF3B1	Splicing factor 3B subunit 1	Color2 [A=255, R=169, G=169, B=169]	1	4		19.117	19.3545	19.2516	19.2891	19.3025	19.2039	18.9382	19.0962	19.3333	19.2288	19.2123	18.995
O75534	O75534	CSDE1_HUMAN	CSDE1	Cold shock domain-containing protein E1	Color2 [A=255, R=169, G=169, B=169]	1	4		15.9768	16.0263	16.1716	16.181	16.1562	16.3331	16.3231	16.4412	16.0089	16.7938	17.0718	17.4435
O75564	O75564	JERKY_HUMAN	JRK	Jerky protein homolog	Color2 [A=255, R=169, G=169, B=169]	1	4		13.8252	14.4283	14.4341	14.3462	14.4637	15.3497	15.3134	14.6602	13.3972	14.5675	14.8468	14.722
O75569	O75569	PRKRA_HUMAN	PRKRA	Interferon-inducible double-stranded RNA-dependent protein kinase activator A	Color2 [A=255, R=169, G=169, B=169]	1	4		14.574	15.1986	15.4638	15.7841	15.9599	15.8011	15.7018	15.9303	15.4725	16.3086	16.1877	16.2645
O75570	O75570	RF1M_HUMAN	MTRF1	Peptide chain release factor 1, mitochondrial	Color2 [A=255, R=169, G=169, B=169]	1	4		18.6315	18.2752	18.3878	18.3695	18.2592	18.0863	18.3489	18.1685	18.64	18.1622	17.9818	18.0004
O75575	O75575	RPC9_HUMAN	CRCP	DNA-directed RNA polymerase III subunit RPC9	Color2 [A=255, R=169, G=169, B=169]	1	4		15.0212	13.5321	12.9158	12.9926	12.9191	13.2896	12.7072	13.0844	13.5445	13.8881	13.8623	14.0526
O75581	O75581	LRP6_HUMAN	LRP6	Low-density lipoprotein receptor-related protein 6	Color2 [A=255, R=169, G=169, B=169]	1	4		13.3734	12.6987	13.7354	13.1553	13.5986	13.4642	13.4485	13.1348	11.7566	12.6553	13.2099	13.8802
O75582	O75582	KS6A5_HUMAN	RPS6KA5	Ribosomal protein S6 kinase alpha-5	Color2 [A=255, R=169, G=169, B=169]	1	4		10.2735	12.6444	13.0631	12.2827	10.3418	12.6533	12.5937	9.66923	11.2232	12.9514	13.2174	12.2611
O75582;O75676	O75582;O75676	KS6A4_HUMAN;KS6A5_HUMAN	RPS6KA4;RPS6KA5	Ribosomal protein S6 kinase alpha-5	Color2 [A=255, R=169, G=169, B=169]	1	4		14.656	14.2772	15.196	14.8693	13.7982	14.1886	14.7202	14.5579	11.8745	14.646	13.8546	15.4472
O75586	O75586	MED6_HUMAN	MED6	Mediator of RNA polymerase II transcription subunit 6	Color2 [A=255, R=169, G=169, B=169]	1	4		15.6577	15.3715	15.7631	15.5474	15.8086	15.7147	15.5694	15.3227	15.7201	15.8285	15.7713	15.7101
O75592	O75592	MYCB2_HUMAN	MYCBP2	E3 ubiquitin-protein ligase MYCBP2	Color2 [A=255, R=169, G=169, B=169]	1	4		15.5994	15.9319	16.1459	16.1185	15.7452	16.3271	16.1359	16.1863	15.6121	16.2783	16.517	16.748
O75596	O75596	CLC3A_HUMAN	CLEC3A	C-type lectin domain family 3 member A	Color2 [A=255, R=169, G=169, B=169]	1	4		15.0446	15.3366	15.5521	16.1483	15.6565	15.425	15.7838	15.293	15.1016	15.2781	15.2604	15.2616
O75600	O75600	KBL_HUMAN	GCAT	2-amino-3-ketobutyrate coenzyme A ligase, mitochondrial	Color2 [A=255, R=169, G=169, B=169]	1	4		20.6991	20.1786	20.3753	20.2596	20.1068	19.8677	20.0368	20.0282	19.8735	19.5839	19.234	19.5887
O75604	O75604	UBP2_HUMAN	USP2	Ubiquitin carboxyl-terminal hydrolase 2	Color2 [A=255, R=169, G=169, B=169]	1	4		14.8533	14.8548	15.3917	15.2289	15.9085	15.8355	15.7982	16.0047	14.3041	15.9433	15.437	15.8867
O75607	O75607	NPM3_HUMAN	NPM3	Nucleoplasmin-3	Color2 [A=255, R=169, G=169, B=169]	1	4		19.4684	19.3855	19.7946	19.646	19.9451	19.9067	19.4819	19.6626	19.8349	19.8691	19.919	19.7854
O75608	O75608	LYPA1_HUMAN	LYPLA1	Acyl-protein thioesterase 1	Color2 [A=255, R=169, G=169, B=169]	1	4		17.8636	18.0309	18.0775	18.3967	17.7498	17.5727	17.6452	17.6226	17.9994	17.7786	17.7654	17.5504
O75616	O75616	ERAL1_HUMAN	ERAL1	GTPase Era, mitochondrial	Color2 [A=255, R=169, G=169, B=169]	1	4		22.9054	22.3664	22.5291	22.5148	22.5274	22.3049	22.5297	22.4693	22.7958	22.3716	22.1404	22.1048
O75618	O75618	DEDD_HUMAN	DEDD	Death effector domain-containing protein	Color2 [A=255, R=169, G=169, B=169]	1	4		12.076	15.0595	14.7846	15.4466	14.1234	15.1996	14.4737	15.0048	14.0417	15.3095	14.7467	15.1961
O75618;Q9NWM3	O75618;Q9NWM3	CUED1_HUMAN;DEDD_HUMAN	CUEDC1;DEDD	Death effector domain-containing protein	Color2 [A=255, R=169, G=169, B=169]	1	4		11.1487	11.3357	11.8414	12.6862	10.072	11.7252	12.2849	11.0343	12.4935	12.9642	11.7149	13.6208
O75629	O75629	CREG1_HUMAN	CREG1	Protein CREG1	Color2 [A=255, R=169, G=169, B=169]	1	4		11.3292	14.3626	9.86619	13.1564	10.5947	11.1158	9.59136	12.9919	13.044	11.8127	12.163	10.6096
O75635	O75635	SPB7_HUMAN	SERPINB7	Serpin B7	Color2 [A=255, R=169, G=169, B=169]	1	4		10.9297	13.7531	12.8738	14.5766	10.9665	10.7995	13.9568	12.6842	11.6007	13.5106	12.1469	14.2251
O75638	O75638	CTAG2_HUMAN	CTAG2	Cancer/testis antigen 2	Color2 [A=255, R=169, G=169, B=169]	1	4		16.9117	17.4269	16.6853	17.1806	17.3951	17.7784	17.6799	17.8347	16.7411	17.6084	17.0012	17.2043
O75643	O75643	U520_HUMAN	SNRNP200	U5 small nuclear ribonucleoprotein 200 kDa helicase	Color2 [A=255, R=169, G=169, B=169]	1	4		19.9823	20.2525	20.1113	20.117	20.2088	20.2309	20.0219	20.0425	20.0744	20.2087	20.2059	19.9088
O75643;Q86VH2	O75643;Q86VH2	KIF27_HUMAN;U520_HUMAN	KIF27;SNRNP200	U5 small nuclear ribonucleoprotein 200 kDa helicase	Color2 [A=255, R=169, G=169, B=169]	1	4		13.3196	14.9238	13.7998	14.4909	14.5066	14.1037	14.4579	15.5043	10.2052	12.7928	12.7907	11.6253
O75648	O75648	MTU1_HUMAN	TRMU	Mitochondrial tRNA-specific 2-thiouridylase 1	Color2 [A=255, R=169, G=169, B=169]	1	4		19.4818	19.2358	19.2621	19.3339	19.1797	18.9149	19.1143	19.1484	19.3432	18.9182	18.6799	18.6093
O75663	O75663	TIPRL_HUMAN	TIPRL	TIP41-like protein	Color2 [A=255, R=169, G=169, B=169]	1	4		14.6701	14.89	14.6311	15.1509	15.1839	15.447	15.781	15.0094	15.4381	16.2106	15.6697	15.969
O75665	O75665	OFD1_HUMAN	OFD1	Centriole and centriolar satellite protein OFD1	Color2 [A=255, R=169, G=169, B=169]	1	4		17.164	16.536	16.9426	17.1704	16.8959	16.8784	17.4399	17.079	17.4533	17.0474	17.1374	17.2326
O75676	O75676	KS6A4_HUMAN	RPS6KA4	Ribosomal protein S6 kinase alpha-4	Color2 [A=255, R=169, G=169, B=169]	1	4		14.9035	14.9473	15.056	12.6288	15.5537	14.1209	14.7008	14.3098	13.5146	14.3205	13.3664	15.0312
O75683	O75683	SURF6_HUMAN	SURF6	Surfeit locus protein 6	Color2 [A=255, R=169, G=169, B=169]	1	4		18.6244	17.86	18.946	18.6914	18.008	18.6038	17.9538	19.616	18.4505	19.0113	18.4397	18.5714
O75688	O75688	PPM1B_HUMAN	PPM1B	Protein phosphatase 1B	Color2 [A=255, R=169, G=169, B=169]	1	4		11.3328	10.5413	12.4971	9.16801	10.0289	11.3912	10.4917	10.572	11.672	11.5156	9.05865	12.9036
O75689	O75689	ADAP1_HUMAN	ADAP1	Arf-GAP with dual PH domain-containing protein 1	Color2 [A=255, R=169, G=169, B=169]	1	4		11.7029	9.779	11.8759	12.5365	12.9645	10.2034	13.1177	10.7721	12.0843	13.1149	13.0643	12.6969
O75691	O75691	UTP20_HUMAN	UTP20	Small subunit processome component 20 homolog	Color2 [A=255, R=169, G=169, B=169]	1	4		16.5947	17.6786	17.7189	17.6467	17.1773	17.6569	17.6736	17.8747	17.1119	17.9064	17.9274	18.0567
O75694	O75694	NU155_HUMAN	NUP155	Nuclear pore complex protein Nup155	Color2 [A=255, R=169, G=169, B=169]	1	4		20.157	20.3627	20.4502	20.4767	20.2641	20.2868	20.0976	20.2874	20.3824	20.3628	20.2359	20.1397
O75695	O75695	XRP2_HUMAN	RP2	Protein XRP2	Color2 [A=255, R=169, G=169, B=169]	1	4		17.6366	17.9008	17.7284	18.0241	18.0225	17.9964	17.8054	18.001	17.4538	18.0522	18.2401	17.7169
O75716	O75716	STK16_HUMAN	STK16	Serine/threonine-protein kinase 16	Color2 [A=255, R=169, G=169, B=169]	1	4		11.801	12.7963	12.7834	12.4984	12.9646	13.4481	12.9427	11.828	13.1745	13.357	12.944	12.9883
O75717	O75717	WDHD1_HUMAN	WDHD1	WD repeat and HMG-box DNA-binding protein 1	Color2 [A=255, R=169, G=169, B=169]	1	4		14.6975	15.9738	15.9815	15.8719	14.7937	15.9056	15.49	15.5493	15.5295	15.724	15.6622	15.6439
O75718	O75718	CRTAP_HUMAN	CRTAP	Cartilage-associated protein	Color2 [A=255, R=169, G=169, B=169]	1	4		18.0271	18.3503	18.0941	18.4675	18.7148	18.8668	19.1196	18.8261	18.3694	19.3753	19.2678	19.2363
O75746	O75746	S2512_HUMAN	SLC25A12	Electrogenic aspartate/glutamate antiporter SLC25A12, mitochondrial	Color2 [A=255, R=169, G=169, B=169]	1	4		19.9132	19.8222	19.7168	19.833	19.6279	19.4646	19.6443	19.5311	19.7337	19.5842	19.4229	19.2193
O75746;Q9UJS0	O75746;Q9UJS0	S2512_HUMAN;S2513_HUMAN	SLC25A12;SLC25A13	Electrogenic aspartate/glutamate antiporter SLC25A12, mitochondrial	Color2 [A=255, R=169, G=169, B=169]	1	4		21.8675	21.6721	21.799	21.4803	21.3394	21.1998	21.2981	21.2467	21.5274	21.1451	21.15	20.9335
O75747	O75747	P3C2G_HUMAN	PIK3C2G	Phosphatidylinositol 3-kinase C2 domain-containing subunit gamma	Color2 [A=255, R=169, G=169, B=169]	1	4		12.6601	12.1158	13.1816	13.0394	11.4473	12.5111	11.5702	11.1933	10.242	12.5802	13.7805	12.0056
O75771	O75771	RA51D_HUMAN	RAD51D	DNA repair protein RAD51 homolog 4	Color2 [A=255, R=169, G=169, B=169]	1	4		12.5625	11.8513	10.1444	12.473	12.9521	12.5266	12.1147	12.106	11.3208	12.7851	12.9374	12.8283
O75787	O75787	RENR_HUMAN	ATP6AP2	Renin receptor	Color2 [A=255, R=169, G=169, B=169]	1	4		17.6503	17.8466	17.7592	17.8722	17.944	17.8337	18.2117	18.0303	17.8562	17.9933	17.9051	17.8019
O75792	O75792	RNH2A_HUMAN	RNASEH2A	Ribonuclease H2 subunit A	Color2 [A=255, R=169, G=169, B=169]	1	4		10.6925	13.0874	13.6928	13.3092	13.2803	13.4521	11.6547	14.2409	12.364	14.0302	14.2966	14.3972
O75794	O75794	CD123_HUMAN	CDC123	Cell division cycle protein 123 homolog	Color2 [A=255, R=169, G=169, B=169]	1	4		15.5455	15.6707	15.385	15.3878	16.0427	16.0532	15.8489	15.9742	15.3199	16.4526	16.3507	16.6654
O75795;P54855	O75795;P54855	UDB15_HUMAN;UDB17_HUMAN	UGT2B15;UGT2B17	UDP-glucuronosyltransferase 2B17	Color2 [A=255, R=169, G=169, B=169]	1	4		20.9057	21.7893	21.956	22.1078	21.8659	10.9663	11.183	22.0118	9.57091	21.812	21.8106	21.6148
O75815	O75815	BCAR3_HUMAN	BCAR3	Breast cancer anti-estrogen resistance protein 3	Color2 [A=255, R=169, G=169, B=169]	1	4		13.3864	12.4229	13.3842	12.8994	11.3813	12.7854	11.1307	11.9196	11.0695	11.1707	11.0721	11.5742
O75817	O75817	POP7_HUMAN	POP7	Ribonuclease P protein subunit p20	Color2 [A=255, R=169, G=169, B=169]	1	4		15.5422	15.9089	14.9232	15.2947	15.2117	15.5405	15.5218	15.9036	14.8837	14.9477	15.2374	13.7723
O75818	O75818	RPP40_HUMAN	RPP40	Ribonuclease P protein subunit p40	Color2 [A=255, R=169, G=169, B=169]	1	4		16.6447	16.4986	16.6871	17.0766	17.1577	17.1841	16.8018	16.8983	17.0285	17.3211	17.171	17.3766
O75820	O75820	ZN189_HUMAN	ZNF189	Zinc finger protein 189	Color2 [A=255, R=169, G=169, B=169]	1	4		13.6866	14.5694	15.0048	14.8352	13.9247	15.1353	15.081	15.0392	14.6997	15.1094	15.229	14.5568
O75821	O75821	EIF3G_HUMAN	EIF3G	Eukaryotic translation initiation factor 3 subunit G	Color2 [A=255, R=169, G=169, B=169]	1	4		13.8493	14.1829	14.3959	14.4973	14.2631	13.598	14.6945	14.5402	13.7326	14.1433	14.3802	15.6303
O75822	O75822	EIF3J_HUMAN	EIF3J	Eukaryotic translation initiation factor 3 subunit J	Color2 [A=255, R=169, G=169, B=169]	1	4		13.0515	14.1217	10.4399	11.728	11.2018	10.2178	11.0598	12.8709	12.6067	11.9699	12.2718	13.9243
O75828	O75828	CBR3_HUMAN	CBR3	Carbonyl reductase [NADPH] 3	Color2 [A=255, R=169, G=169, B=169]	1	4		12.6558	12.4052	13.5933	13.9257	12.9206	13.7691	14.2526	13.8627	13.8869	15.186	14.9019	15.0942
O75828;P16152	O75828;P16152	CBR1_HUMAN;CBR3_HUMAN	CBR1;CBR3	Carbonyl reductase [NADPH] 3	Color2 [A=255, R=169, G=169, B=169]	1	4		16.3844	16.0831	15.9134	16.4973	16.656	16.6717	16.5049	16.7856	16.8039	17.1892	17.3676	17.6277
O75832	O75832	PSD10_HUMAN	PSMD10	26S proteasome non-ATPase regulatory subunit 10	Color2 [A=255, R=169, G=169, B=169]	1	4		13.5844	15.0779	15.6993	14.9883	15.0689	14.7153	14.6302	14.3315	15.2652	15.0962	15.16	15.5048
O75840	O75840	KLF7_HUMAN	KLF7	Krueppel-like factor 7	Color2 [A=255, R=169, G=169, B=169]	1	4		10.7316	11.36	11.7269	13.9748	9.69927	13.9846	12.6817	12.5883	11.6131	11.759	12.7854	12.3884
O75844	O75844	FACE1_HUMAN	ZMPSTE24	CAAX prenyl protease 1 homolog	Color2 [A=255, R=169, G=169, B=169]	1	4		20.1829	20.5373	19.9871	20.2324	20.4109	19.7483	20.3381	20.385	19.7472	20.0189	20.276	19.8766
O75845	O75845	SC5D_HUMAN	SC5D	Lathosterol oxidase	Color2 [A=255, R=169, G=169, B=169]	1	4		17.9058	18.9288	18.6307	18.6316	18.7096	18.8013	18.8509	18.6739	18.1605	18.5445	18.8568	18.5612
O75865	O75865	TPC6A_HUMAN	TRAPPC6A	Trafficking protein particle complex subunit 6A	Color2 [A=255, R=169, G=169, B=169]	1	4		12.9705	13.1828	12.3466	13.1027	13.4648	13.574	12.4809	12.8456	13.2445	13.3268	13.6341	13.9165
O75874	O75874	IDHC_HUMAN	IDH1	Isocitrate dehydrogenase [NADP] cytoplasmic	Color2 [A=255, R=169, G=169, B=169]	1	4		15.4268	15.7801	15.5534	15.4174	15.4185	14.4418	15.3604	15.4194	14.7193	15.0411	15.6053	15.3364
O75874;P48735	O75874;P48735	IDHC_HUMAN;IDHP_HUMAN	IDH1;IDH2	Isocitrate dehydrogenase [NADP] cytoplasmic	Color2 [A=255, R=169, G=169, B=169]	1	4		24.2816	23.4996	23.5923	23.6587	24.0701	22.9264	24.0288	23.5632	24.3018	23.5584	23.2688	23.5319
O75879	O75879	GATB_HUMAN	GATB	Glutamyl-tRNA(Gln) amidotransferase subunit B, mitochondrial	Color2 [A=255, R=169, G=169, B=169]	1	4		23.0018	22.4557	22.6436	22.5237	22.6713	22.4341	22.6017	22.6304	22.7961	22.2652	22.1395	21.9972
O75880	O75880	SCO1_HUMAN	SCO1	Protein SCO1 homolog, mitochondrial	Color2 [A=255, R=169, G=169, B=169]	1	4		20.6972	20.4842	20.4459	20.7064	20.8137	20.3526	20.579	20.8119	20.1422	20.2231	20.1743	19.8635
O75882	O75882	ATRN_HUMAN	ATRN	Attractin	Color2 [A=255, R=169, G=169, B=169]	1	4		14.3043	14.5821	14.3118	13.9647	15.1506	15.3066	14.8195	14.8369	15.5016	15.5943	15.4241	15.3013
O75886	O75886	STAM2_HUMAN	STAM2	Signal transducing adapter molecule 2	Color2 [A=255, R=169, G=169, B=169]	1	4		12.0358	10.5818	11.9373	9.63117	9.497	10.6533	11.0777	11.8571	12.106	10.3516	9.04077	10.8613
O75891	O75891	AL1L1_HUMAN	ALDH1L1	Cytosolic 10-formyltetrahydrofolate dehydrogenase	Color2 [A=255, R=169, G=169, B=169]	1	4		18.09	17.1022	17.3952	17.9875	17.5756	17.8182	18.341	17.8668	18.1243	17.1281	17.2039	17.3303
O75891;Q3SY69	O75891;Q3SY69	AL1L1_HUMAN;AL1L2_HUMAN	ALDH1L1;ALDH1L2	Cytosolic 10-formyltetrahydrofolate dehydrogenase	Color2 [A=255, R=169, G=169, B=169]	1	4		23.2007	22.8869	22.9727	23.1071	23.1497	22.9295	22.9808	23.0471	23.0924	22.5939	22.3361	22.2714
O75907	O75907	DGAT1_HUMAN	DGAT1	Diacylglycerol O-acyltransferase 1	Color2 [A=255, R=169, G=169, B=169]	1	4		13.0085	15.072	15.1332	14.7468	15.3387	14.7386	15.1467	15.1654	14.8387	15.5179	15.3762	14.9949
O75909	O75909	CCNK_HUMAN	CCNK	Cyclin-K	Color2 [A=255, R=169, G=169, B=169]	1	4		15.9525	15.9442	15.5229	16.0618	16.2037	15.7074	15.7821	15.0059	16.3333	16.391	16.0577	15.8778
O75915	O75915	PRAF3_HUMAN	ARL6IP5	PRA1 family protein 3	Color2 [A=255, R=169, G=169, B=169]	1	4		17.4641	17.9632	17.3517	17.7811	17.9627	17.8118	18.0372	18.2104	17.6259	17.8907	17.8554	17.0445
O75925	O75925	PIAS1_HUMAN	PIAS1	E3 SUMO-protein ligase PIAS1	Color2 [A=255, R=169, G=169, B=169]	1	4		16.0981	17.2217	17.0594	17.0569	16.4386	17.6038	17.3643	17.0819	16.0192	17.5884	17.6738	17.4679
O75925;O75928	O75925;O75928	PIAS1_HUMAN;PIAS2_HUMAN	PIAS1;PIAS2	E3 SUMO-protein ligase PIAS1	Color2 [A=255, R=169, G=169, B=169]	1	4		16.6432	17.6131	17.1209	17.374	16.2988	17.5573	17.2793	17.5214	16.4266	17.4606	17.4054	17.5994
O75928	O75928	PIAS2_HUMAN	PIAS2	E3 SUMO-protein ligase PIAS2	Color2 [A=255, R=169, G=169, B=169]	1	4		15.0995	16.3913	15.9121	16.3578	14.5965	16.8452	16.773	16.8029	15.3935	16.8566	16.8444	16.9306
O75928;Q9Y6X2	O75928;Q9Y6X2	PIAS2_HUMAN;PIAS3_HUMAN	PIAS2;PIAS3	E3 SUMO-protein ligase PIAS2	Color2 [A=255, R=169, G=169, B=169]	1	4		13.7006	15.5308	15.2603	15.1527	14.533	15.4325	15.5937	15.4846	14.769	15.6223	15.5585	15.4909
O75934	O75934	SPF27_HUMAN	BCAS2	Pre-mRNA-splicing factor SPF27	Color2 [A=255, R=169, G=169, B=169]	1	4		17.4687	17.1849	17.4051	17.7025	17.8418	17.9293	17.5097	17.8417	17.7736	17.7545	17.8337	17.7652
O75935	O75935	DCTN3_HUMAN	DCTN3	Dynactin subunit 3	Color2 [A=255, R=169, G=169, B=169]	1	4		10.058	10.5111	10.9501	12.0179	11.6909	12.9764	11.927	12.4788	11.8915	11.4834	13.58	13.6799
O75940	O75940	SPF30_HUMAN	SMNDC1	Survival of motor neuron-related-splicing factor 30	Color2 [A=255, R=169, G=169, B=169]	1	4		17.3977	16.7997	17.7301	17.2051	17.749	17.4856	17.9211	17.4314	18.128	18.0091	18.4039	18.5797
O75943	O75943	RAD17_HUMAN	RAD17	Cell cycle checkpoint protein RAD17	Color2 [A=255, R=169, G=169, B=169]	1	4		13.9477	13.9218	14.3135	14.5728	14.9243	13.9115	15.0814	14.5849	14.1383	14.2738	14.966	14.7037
O75947	O75947	ATP5H_HUMAN	ATP5PD	ATP synthase subunit d, mitochondrial	Color2 [A=255, R=169, G=169, B=169]	1	4		20.4738	20.4117	20.5878	20.6307	20.9381	21.1046	20.7732	20.8901	21.1435	21.1562	20.9292	21.0813
O75952	O75952	CABYR_HUMAN	CABYR	Calcium-binding tyrosine phosphorylation-regulated protein	Color2 [A=255, R=169, G=169, B=169]	1	4		11.9218	10.6892	11.8915	11.4541	11.1555	11.4741	12.7076	11.7052	11.1229	12.222	9.7761	11.2597
O75953	O75953	DNJB5_HUMAN	DNAJB5	DnaJ homolog subfamily B member 5	Color2 [A=255, R=169, G=169, B=169]	1	4		13.3752	13.0198	12.9218	12.8126	14.7024	14.5666	14.9243	14.8503	14.6046	14.8238	14.9753	15.2777
O75955	O75955	FLOT1_HUMAN	FLOT1	Flotillin-1	Color2 [A=255, R=169, G=169, B=169]	1	4		17.9312	18.0628	17.9798	17.8339	18.3093	18.2404	18.1071	18.2072	17.9623	18.1617	18.2457	18.289
O75962	O75962	TRIO_HUMAN	TRIO	Triple functional domain protein	Color2 [A=255, R=169, G=169, B=169]	1	4		14.3064	13.6668	13.5236	13.632	14.1371	14.1281	14.4428	14.2014	13.2941	14.4819	14.9888	14.8032
O75964	O75964	ATP5L_HUMAN	ATP5MG	ATP synthase subunit g, mitochondrial	Color2 [A=255, R=169, G=169, B=169]	1	4		24.2892	24.1307	24.139	24.0493	24.0892	24.1217	24.2236	24.2143	24.1325	23.7741	23.7291	23.5829
O75970	O75970	MPDZ_HUMAN	MPDZ	Multiple PDZ domain protein	Color2 [A=255, R=169, G=169, B=169]	1	4		15.6727	16.0549	16.1869	16.0276	16.1449	16.3584	16.3299	16.0438	15.8619	16.5039	16.463	16.2801
O75970;Q8NI35	O75970;Q8NI35	INADL_HUMAN;MPDZ_HUMAN	MPDZ;PATJ	Multiple PDZ domain protein	Color2 [A=255, R=169, G=169, B=169]	1	4		14.9093	15.6411	14.6777	15.2032	15.4393	15.7805	15.5674	15.2709	14.9535	15.6645	15.5805	15.3807
O75976	O75976	CBPD_HUMAN	CPD	Carboxypeptidase D	Color2 [A=255, R=169, G=169, B=169]	1	4		18.3619	18.347	18.4142	18.4383	17.987	17.9787	17.8591	18.0439	18.1568	18.0368	17.8686	17.8708
O76003	O76003	GLRX3_HUMAN	GLRX3	Glutaredoxin-3	Color2 [A=255, R=169, G=169, B=169]	1	4		14.8714	16.1772	16.1474	16.0119	16.0745	16.5	16.3249	16.4763	16.3045	17.1115	17.2973	17.5965
O76009;O76011;P13646;Q14525;Q15323;Q9C075	O76011;P13646;P35900;Q14525;Q15323;Q6A162;O76009;Q9C075	K1C13_HUMAN;K1C23_HUMAN;K1H1_HUMAN;KRT34_HUMAN;KT33A_HUMAN;KT33B_HUMAN	KRT13;KRT23;KRT31;KRT33A;KRT33B;KRT34	Keratin, type I cuticular Ha3-I	Color2 [A=255, R=169, G=169, B=169]	1	4		15.1888	15.6631	16.0211	16.6251	11.5836	11.8638	16.7219	10.6643	17.52	10.6683	16.8217	15.3697
O76009;O76011;Q14525;Q14532;Q15323	O76011;Q14525;Q14532;Q15323;Q92764;O76009	K1H1_HUMAN;K1H2_HUMAN;KRT34_HUMAN;KT33A_HUMAN;KT33B_HUMAN	KRT31;KRT32;KRT33A;KRT33B;KRT34	Keratin, type I cuticular Ha3-I	Color2 [A=255, R=169, G=169, B=169]	1	4		12.3255	14.7856	17.3531	16.7011	14.8475	14.216	12.5793	11.8347	11.7803	12.0341	13.6618	12.7107
O76009;O76011;Q14525;Q15323	O76011;Q14525;Q15323;O76009	K1H1_HUMAN;KRT34_HUMAN;KT33A_HUMAN;KT33B_HUMAN	KRT31;KRT33A;KRT33B;KRT34	Keratin, type I cuticular Ha3-I	Color2 [A=255, R=169, G=169, B=169]	1	4		11.5296	14.1007	16.2359	14.482	13.7611	12.6577	12.3514	11.2993	12.3923	12.0797	13.7177	12.2948
O76009;Q14525;Q15323	Q14525;Q15323;O76009	K1H1_HUMAN;KT33A_HUMAN;KT33B_HUMAN	KRT31;KRT33A;KRT33B	Keratin, type I cuticular Ha3-I	Color2 [A=255, R=169, G=169, B=169]	1	4		10.1834	14.3955	17.3718	16.3513	14.291	15.9045	11.195	10.0275	13.1948	10.2397	11.4009	11.39
O76009;Q14532;Q15323	Q14532;Q15323;O76009	K1H1_HUMAN;K1H2_HUMAN;KT33A_HUMAN	KRT31;KRT32;KRT33A	Keratin, type I cuticular Ha3-I	Color2 [A=255, R=169, G=169, B=169]	1	4		11.2531	13.5867	15.3789	13.7176	14.7505	12.916	12.9363	11.0653	13.865	12.1916	13.6065	12.0316
O76009;Q15323	Q15323;O76009	K1H1_HUMAN;KT33A_HUMAN	KRT31;KRT33A	Keratin, type I cuticular Ha3-I	Color2 [A=255, R=169, G=169, B=169]	1	4		9.88344	15.4138	19.0485	17.0549	15.7565	16.1566	11.2626	9.4391	12.5824	12.6453	15.9161	13.4703
O76011	O76011	KRT34_HUMAN	KRT34	Keratin, type I cuticular Ha4	Color2 [A=255, R=169, G=169, B=169]	1	4		16.4122	16.5709	18.0593	16.9007	16.5979	15.9949	15.5336	16.1786	16.6501	15.9529	15.6403	17.2351
O76013;P02533;P05783;P08727;P08779;P13645;P13646;P19012;Q04695;Q14525;Q14532;Q15323;Q2M2I5;Q7Z3Y7	O76013;O76014;O76015;P02533;P05783;P08727;P08779;P13645;P13646;P19012;Q04695;Q14525;Q14532;Q15323;Q2M2I5;Q7Z3Y7;Q92764	K1C10_HUMAN;K1C13_HUMAN;K1C14_HUMAN;K1C15_HUMAN;K1C16_HUMAN;K1C17_HUMAN;K1C18_HUMAN;K1C19_HUMAN;K1C24_HUMAN;K1C28_HUMAN;K1H1_HUMAN;K1H2_HUMAN;KRT36_HUMAN;KT33B_HUMAN	KRT10;KRT13;KRT14;KRT15;KRT16;KRT17;KRT18;KRT19;KRT24;KRT28;KRT31;KRT32;KRT33B;KRT36	Keratin, type I cuticular Ha6	Color2 [A=255, R=169, G=169, B=169]	1	4		19.6997	20.3524	20.3092	19.534	19.2813	18.1404	18.9169	19.3949	19.5954	18.6995	18.8627	20.6596
O76021	O76021	RL1D1_HUMAN	RSL1D1	Ribosomal L1 domain-containing protein 1	Color2 [A=255, R=169, G=169, B=169]	1	4		20.8548	21.3661	21.3795	21.4881	21.2273	21.4626	21.6269	21.7178	21.1463	21.6233	21.5951	21.6493
O76024	O76024	WFS1_HUMAN	WFS1	Wolframin	Color2 [A=255, R=169, G=169, B=169]	1	4		18.0865	18.1823	18.0019	18.1337	18.8466	18.9757	18.6764	18.7599	19.1676	19.3466	19.1904	19.2884
O76031	O76031	CLPX_HUMAN	CLPX	ATP-dependent Clp protease ATP-binding subunit clpX-like, mitochondrial	Color2 [A=255, R=169, G=169, B=169]	1	4		24.0304	23.5388	23.6672	23.6837	23.7853	23.4493	23.685	23.6464	23.9182	23.4145	23.2327	23.2476
O76039	O76039	CDKL5_HUMAN	CDKL5	Cyclin-dependent kinase-like 5	Color2 [A=255, R=169, G=169, B=169]	1	4		12.03	12.1861	8.74198	10.8091	11.0716	12.1402	11.9077	12.3502	12.3469	11.1085	11.442	12.1134
O76039;O94806;Q00532;Q15139;Q9BZL6	O76039;O94806;Q00532;Q15139;Q8IVW4;Q92772;Q9BZL6;Q9NRP7	CDKL1_HUMAN;CDKL5_HUMAN;KPCD1_HUMAN;KPCD2_HUMAN;KPCD3_HUMAN	CDKL1;CDKL5;PRKD1;PRKD2;PRKD3	Cyclin-dependent kinase-like 5	Color2 [A=255, R=169, G=169, B=169]	1	4		14.9717	15.108	14.5365	15.6364	15.6871	14.9497	16.6149	16.6198	15.7048	16.53	16.1843	15.9224
O76061	O76061	STC2_HUMAN	STC2	Stanniocalcin-2	Color2 [A=255, R=169, G=169, B=169]	1	4		14.4562	13.5172	11.6075	14.0393	11.4462	14.9702	14.9227	10.746	14.1158	14.2748	13.8842	14.5876
O76062	O76062	ERG24_HUMAN	TM7SF2	Delta(14)-sterol reductase TM7SF2	Color2 [A=255, R=169, G=169, B=169]	1	4		17.1584	17.4987	17.1322	17.0281	17.3384	17.3696	17.3648	17.5713	17.181	17.2119	16.9529	16.6324
O76071	O76071	CIAO1_HUMAN	CIAO1	Probable cytosolic iron-sulfur protein assembly protein CIAO1	Color2 [A=255, R=169, G=169, B=169]	1	4		15.5834	16.0944	16.2353	15.9348	16.1786	15.595	15.6798	16.0153	15.9974	15.8	16.2362	16.0536
O76075	O76075	DFFB_HUMAN	DFFB	DNA fragmentation factor subunit beta	Color2 [A=255, R=169, G=169, B=169]	1	4		13.0279	14.4262	13.7694	14.0572	14.4819	14.8984	14.9535	14.4578	14.7685	14.6616	15.0194	15.2795
O76094	O76094	SRP72_HUMAN	SRP72	Signal recognition particle subunit SRP72	Color2 [A=255, R=169, G=169, B=169]	1	4		15.4226	15.8607	15.8071	15.8023	15.7008	15.7385	16.1125	16.1507	15.7605	16.4135	16.4224	16.3293
O94761	O94761	RECQ4_HUMAN	RECQL4	ATP-dependent DNA helicase Q4	Color2 [A=255, R=169, G=169, B=169]	1	4		14.3222	15.4246	15.5743	15.4783	14.8887	15.7516	15.563	15.372	14.7033	15.1628	15.1781	15.1669
O94762	O94762	RECQ5_HUMAN	RECQL5	ATP-dependent DNA helicase Q5	Color2 [A=255, R=169, G=169, B=169]	1	4		14.964	15.3507	15.4862	15.4325	15.173	15.4221	15.138	15.0466	14.7181	15.2463	14.7722	14.4898
O94766	O94766;Q9NPZ5	B3GA3_HUMAN	B3GAT3	Galactosylgalactosylxylosylprotein 3-beta-glucuronosyltransferase 3	Color2 [A=255, R=169, G=169, B=169]	1	4		16.093	16.3809	15.928	16.4196	15.9989	15.4606	16.0516	16.0312	15.7109	15.9136	15.7809	15.8469
O94776	O94776	MTA2_HUMAN	MTA2	Metastasis-associated protein MTA2	Color2 [A=255, R=169, G=169, B=169]	1	4		19.3573	19.9619	19.8931	19.7745	19.7967	20.3017	20.1723	20.0389	19.7098	20.2681	20.2651	20.0198
O94776;Q13330	O94776;Q13330	MTA1_HUMAN;MTA2_HUMAN	MTA1;MTA2	Metastasis-associated protein MTA2	Color2 [A=255, R=169, G=169, B=169]	1	4		11.1205	12.5083	14.4227	13.2783	10.1861	12.3122	12.0703	14.7588	8.68017	13.8058	14.172	14.3263
O94776;Q13330;Q9BTC8	O94776;Q13330;Q9BTC8	MTA1_HUMAN;MTA2_HUMAN;MTA3_HUMAN	MTA1;MTA2;MTA3	Metastasis-associated protein MTA2	Color2 [A=255, R=169, G=169, B=169]	1	4		18.4647	18.9181	19.0975	18.6954	18.5768	19.0189	18.9264	18.9533	18.5579	18.7862	18.8965	18.6027
O94776;Q9BTC8	O94776;Q9BTC8	MTA2_HUMAN;MTA3_HUMAN	MTA2;MTA3	Metastasis-associated protein MTA2	Color2 [A=255, R=169, G=169, B=169]	1	4		15.9493	17.0791	16.9044	17.2838	17.7652	17.8352	17.5969	17.4969	17.0614	17.8098	17.376	17.499
O94782	O94782	UBP1_HUMAN	USP1	Ubiquitin carboxyl-terminal hydrolase 1	Color2 [A=255, R=169, G=169, B=169]	1	4		13.3198	13.5229	13.1941	14.2518	12.4445	14.3339	13.5884	13.9133	15.0439	13.1573	13.615	13.3867
O94804	O94804	STK10_HUMAN	STK10	Serine/threonine-protein kinase 10	Color2 [A=255, R=169, G=169, B=169]	1	4		14.6894	11.542	13.6858	14.2215	14.112	14.2807	13.9988	14.0698	14.6011	14.8495	14.338	15.1341
O94804;Q9H2G2	O94804;Q9H2G2	SLK_HUMAN;STK10_HUMAN	SLK;STK10	Serine/threonine-protein kinase 10	Color2 [A=255, R=169, G=169, B=169]	1	4		13.6275	10.5862	9.83064	11.7566	11.8094	11.6496	11.3908	11.512	12.9573	14.6383	11.9936	13.0177
O94805	O94805	ACL6B_HUMAN	ACTL6B	Actin-like protein 6B	Color2 [A=255, R=169, G=169, B=169]	1	4		19.234	19.2602	19.2926	19.106	19.33	19.3131	18.9962	19.2723	19.5514	19.3556	19.3525	19.0786
O94805;O96019	O94805;O96019	ACL6A_HUMAN;ACL6B_HUMAN	ACTL6A;ACTL6B	Actin-like protein 6B	Color2 [A=255, R=169, G=169, B=169]	1	4		19.4181	18.963	19.0242	19.2789	18.9549	19.2615	19.0966	18.9094	19.4092	19.0424	19.1716	18.936
O94806	O94806	KPCD3_HUMAN	PRKD3	Serine/threonine-protein kinase D3	Color2 [A=255, R=169, G=169, B=169]	1	4		14.2333	13.5393	13.6289	14.9472	14.7096	15.1656	14.8097	13.8438	14.5949	15.1517	14.7847	14.41
O94806;Q15139	O94806;Q15139	KPCD1_HUMAN;KPCD3_HUMAN	PRKD1;PRKD3	Serine/threonine-protein kinase D3	Color2 [A=255, R=169, G=169, B=169]	1	4		16.8903	16.6122	17.7927	16.514	15.7838	17.7419	17.3175	17.0336	15.2757	17.4564	17.6171	17.5672
O94806;Q9BZL6	O94806;Q9BZL6	KPCD2_HUMAN;KPCD3_HUMAN	PRKD2;PRKD3	Serine/threonine-protein kinase D3	Color2 [A=255, R=169, G=169, B=169]	1	4		12.916	12.4077	10.1644	11.3052	12.5221	12.3849	13.3637	13.2546	13.474	12.3587	13.0839	13.2406
O94813	O94813	SLIT2_HUMAN	SLIT2	Slit homolog 2 protein	Color2 [A=255, R=169, G=169, B=169]	1	4		12.5266	11.8065	12.6782	13.65	12.6405	13.3507	13.8203	13.5644	13.4971	13.6813	13.2813	13.7599
O94818	O94818	NOL4_HUMAN	NOL4	Nucleolar protein 4	Color2 [A=255, R=169, G=169, B=169]	1	4		11.5241	12.6801	13.2061	12.0259	10.8967	13.6102	12.7258	12.9624	11.8605	13.2079	12.5391	12.6816
O94818;Q96MY1	O94818;Q96MY1	NOL4L_HUMAN;NOL4_HUMAN	NOL4;NOL4L	Nucleolar protein 4	Color2 [A=255, R=169, G=169, B=169]	1	4		12.9017	13.2798	14.3744	14.292	14.19	15.6065	15.5988	14.3618	13.8348	15.8847	15.5512	15.4339
O94822	O94822	LTN1_HUMAN	LTN1	E3 ubiquitin-protein ligase listerin	Color2 [A=255, R=169, G=169, B=169]	1	4		14.0515	14.426	13.9653	14.5788	13.962	12.1735	14.2766	14.5792	14.5193	14.5208	15.0716	14.9092
O94826	O94826	TOM70_HUMAN	TOMM70	Mitochondrial import receptor subunit TOM70	Color2 [A=255, R=169, G=169, B=169]	1	4		18.0682	18.1622	18.6461	18.4647	18.2788	18.5464	18.0688	18.2451	19.0374	18.3598	18.3456	18.1678
O94827	O94827	PKHG5_HUMAN	PLEKHG5	Pleckstrin homology domain-containing family G member 5	Color2 [A=255, R=169, G=169, B=169]	1	4		13.9286	13.1259	13.3308	14.5771	13.2511	13.7808	13.7194	13.3452	13.9181	14.6202	14.732	14.4767
O94830	O94830	DDHD2_HUMAN	DDHD2	Phospholipase DDHD2	Color2 [A=255, R=169, G=169, B=169]	1	4		16.0614	16.8283	16.2795	16.8274	16.9265	17.2867	16.9096	17.09	16.8885	17.5475	17.7491	17.515
O94832	O94832	MYO1D_HUMAN	MYO1D	Unconventional myosin-Id	Color2 [A=255, R=169, G=169, B=169]	1	4		16.6464	15.0898	15.4978	16.1209	17.1399	17.1335	17.0675	17.0953	16.6596	17.0308	17.1296	17.3733
O94842	O15405;O94842;Q96NM4	TOX4_HUMAN	TOX4	TOX high mobility group box family member 4	Color2 [A=255, R=169, G=169, B=169]	1	4		14.7334	15.1225	15.6976	14.7342	15.1289	15.1259	14.4578	15.0148	14.2015	12.9601	15.0608	14.7763
O94850	O94850	DEND_HUMAN	DDN	Dendrin	Color2 [A=255, R=169, G=169, B=169]	1	4		13.6089	14.0423	13.9678	14.1252	13.6897	14.5984	14.1528	14.6887	13.3848	13.7297	13.9645	14.4915
O94851	O94851	MICA2_HUMAN	MICAL2	[F-actin]-monooxygenase MICAL2	Color2 [A=255, R=169, G=169, B=169]	1	4		14.3466	14.1939	14.2003	14.5846	14.6465	14.9148	15.2476	15.0121	15.4001	15.3726	14.6897	14.0508
O94851;Q7RTP6	O94851;Q7RTP6	MICA2_HUMAN;MICA3_HUMAN	MICAL2;MICAL3	[F-actin]-monooxygenase MICAL2	Color2 [A=255, R=169, G=169, B=169]	1	4		10.525	11.7794	9.27812	11.7802	12.2989	11.9041	11.942	12.5368	11.5471	13.0833	12.4389	12.5652
O94854	O94854	K0754_HUMAN	MACF1	Microtubule-actin cross-linking factor 1, isoforms 6/7	Color2 [A=255, R=169, G=169, B=169]	1	4		13.6105	14.5008	14.1974	14.0927	14.6213	14.7733	14.5125	13.8368	13.6754	15.251	14.8112	15.1388
O94854;Q03001;Q9UPN3	Q03001;Q9UPN3;O94854	DYST_HUMAN;K0754_HUMAN;MACF1_HUMAN	DST;MACF1	Microtubule-actin cross-linking factor 1, isoforms 6/7	Color2 [A=255, R=169, G=169, B=169]	1	4		12.2424	13.2906	13.7039	13.1537	13.2175	12.3324	12.9836	13.4598	12.5879	12.521	11.2004	14.071
O94854;Q9UPN3	Q9UPN3;O94854	K0754_HUMAN;MACF1_HUMAN	MACF1	Microtubule-actin cross-linking factor 1, isoforms 6/7	Color2 [A=255, R=169, G=169, B=169]	1	4		13.2297	13.7204	13.5812	13.2299	13.7009	13.9568	14.0104	13.6294	13.6332	14.8927	14.6804	14.9932
O94855	O94855	SC24D_HUMAN	SEC24D	Protein transport protein Sec24D	Color2 [A=255, R=169, G=169, B=169]	1	4		11.4257	10.1114	10.5961	13.2123	10.7395	12.64	14.0699	12.7253	12.0414	13.8859	13.8834	13.5552
O94864	O94864	ST65G_HUMAN	SUPT7L	STAGA complex 65 subunit gamma	Color2 [A=255, R=169, G=169, B=169]	1	4		14.35	14.1449	13.3798	14.5398	14.438	15.5816	14.9083	14.9147	14.6847	15.1896	15.4791	15.7092
O94874	O94874;Q92845	UFL1_HUMAN	UFL1	E3 UFM1-protein ligase 1	Color2 [A=255, R=169, G=169, B=169]	1	4		19.6253	19.708	19.611	19.5185	19.5334	19.6041	19.593	19.4796	19.7378	19.5273	19.4998	19.2468
O94874;Q92845	O94874;Q92845	KIFA3_HUMAN;UFL1_HUMAN	KIFAP3;UFL1	E3 UFM1-protein ligase 1	Color2 [A=255, R=169, G=169, B=169]	1	4		16.5043	15.9138	15.8442	16.489	15.7502	16.0199	15.855	14.6668	16.0503	16.0292	14.5732	15.4284
O94875	O94875	SRBS2_HUMAN	SORBS2	Sorbin and SH3 domain-containing protein 2	Color2 [A=255, R=169, G=169, B=169]	1	4		12.4077	11.0817	12.9127	13.9468	12.8632	12.6262	13.2324	12.2896	12.9413	13.4168	13.0372	12.9434
O94880	O94880	PHF14_HUMAN	PHF14	PHD finger protein 14	Color2 [A=255, R=169, G=169, B=169]	1	4		16.918	18.2198	18.2056	18.2699	17.7468	18.5503	18.1299	18.1306	17.4663	18.1783	18.3958	18.2438
O94887	O94887	FARP2_HUMAN	FARP2	FERM, ARHGEF and pleckstrin domain-containing protein 2	Color2 [A=255, R=169, G=169, B=169]	1	4		16.2979	16.6288	16.6479	16.6463	16.5862	16.8112	16.8556	16.6428	16.1788	16.9394	16.7099	16.3997
O94892	O94892	ZN432_HUMAN	ZNF432	Zinc finger protein 432	Color2 [A=255, R=169, G=169, B=169]	1	4		13.7886	13.0071	12.1727	14.0457	12.3667	12.907	12.4956	12.0373	13.5312	11.0513	12.6636	12.9113
O94892;P17025;Q06730;Q06732;Q14587;Q8N883;Q8NDW4	Q06730;Q14587;O94892;P17025;Q06732;Q8N883;Q8NDW4	ZN182_HUMAN;ZN248_HUMAN;ZN268_HUMAN;ZN33A_HUMAN;ZN33B_HUMAN;ZN432_HUMAN;ZN614_HUMAN	ZNF182;ZNF248;ZNF268;ZNF33A;ZNF33B;ZNF432;ZNF614	Zinc finger protein 432	Color2 [A=255, R=169, G=169, B=169]	1	4		13.4514	15.5843	14.5878	15.3946	12.9362	15.1553	15.1864	14.9634	12.4071	14.8164	14.7578	14.636
O94892;Q6P3V2;Q8N883;Q8N8J6;Q9GZX5	Q9GZX5;O94892;Q8N883;Q8N8J6;Q52M93;Q6P3V2	Z585A_HUMAN;ZN350_HUMAN;ZN432_HUMAN;ZN614_HUMAN;ZN615_HUMAN	ZNF350;ZNF432;ZNF585A;ZNF614;ZNF615	Zinc finger protein 432	Color2 [A=255, R=169, G=169, B=169]	1	4		10.918	13.3321	13.4544	13.0648	11.8237	11.6681	13.185	13.1701	8.45435	13.5651	14.0064	13.0466
O94892;Q8N883;Q8N8J6;Q9GZX5	Q9GZX5;O94892;Q8N883;Q8N8J6;Q52M93;Q6P3V2	ZN350_HUMAN;ZN432_HUMAN;ZN614_HUMAN;ZN615_HUMAN	ZNF350;ZNF432;ZNF614;ZNF615	Zinc finger protein 432	Color2 [A=255, R=169, G=169, B=169]	1	4		11.6972	11.0488	12.3506	13.4007	13.4764	11.9547	13.5959	13.9202	10.93	13.846	13.835	13.2888
O94892;Q8N8J6;Q96MU6	O94892;Q8N184;Q8N8J6;Q96SR6;Q96MU6	ZN432_HUMAN;ZN615_HUMAN;ZN778_HUMAN	ZNF432;ZNF615;ZNF778	Zinc finger protein 432	Color2 [A=255, R=169, G=169, B=169]	1	4		10.5723	13.9143	12.9867	14.6766	11.6673	14.0074	13.4314	13.937	12.1221	14.4797	13.0246	12.7268
O94898	O94898	LRIG2_HUMAN	LRIG2	Leucine-rich repeats and immunoglobulin-like domains protein 2	Color2 [A=255, R=169, G=169, B=169]	1	4		14.848	15.1978	14.6771	15.2513	14.8902	14.9361	14.8659	14.9124	15.0472	14.85	15.0152	15.0101
O94901	O94901	SUN1_HUMAN	SUN1	SUN domain-containing protein 1	Color2 [A=255, R=169, G=169, B=169]	1	4		19.1164	19.3906	19.4079	19.4985	19.1402	19.431	19.1193	19.0918	18.9896	19.2788	19.4178	19.2225
O94901;Q9UH99	O94901;Q9UH99	SUN1_HUMAN;SUN2_HUMAN	SUN1;SUN2	SUN domain-containing protein 1	Color2 [A=255, R=169, G=169, B=169]	1	4		12.9877	14.3129	14.3188	13.1622	14.0405	14.818	12.8523	13.9531	12.7595	13.8048	12.6703	11.2993
O94903	O94903	PLPHP_HUMAN	PLPBP	Pyridoxal phosphate homeostasis protein	Color2 [A=255, R=169, G=169, B=169]	1	4		16.1171	15.9812	16.2474	16.7905	16.6546	16.5091	16.2254	16.0159	16.5349	16.6802	16.6986	17.0149
O94905	O94905	ERLN2_HUMAN	ERLIN2	Erlin-2	Color2 [A=255, R=169, G=169, B=169]	1	4		18.1033	18.2558	18.2983	18.0748	18.5511	18.4618	18.442	18.6018	18.593	18.4168	18.512	18.3279
O94906	O94906	PRP6_HUMAN	PRPF6	Pre-mRNA-processing factor 6	Color2 [A=255, R=169, G=169, B=169]	1	4		18.7774	19.2146	19.1404	19.207	19.0192	19.3185	19.2325	19.1038	18.9473	19.3597	19.3621	19.022
O94910	O94910	AGRL1_HUMAN	ADGRL1	Adhesion G protein-coupled receptor L1	Color2 [A=255, R=169, G=169, B=169]	1	4		13.0467	13.8483	12.9211	14.088	13.8443	14.5721	14.3413	13.5086	13.3674	14.3649	14.3581	14.6593
O94910;O95490	O94910;O95490	AGRL1_HUMAN;AGRL2_HUMAN	ADGRL1;ADGRL2	Adhesion G protein-coupled receptor L1	Color2 [A=255, R=169, G=169, B=169]	1	4		11.3038	13.6222	10.4782	13.7224	12.7136	14.2944	13.1353	12.9261	12.8558	13.8313	12.4076	12.1703
O94913	O94913	PCF11_HUMAN	PCF11	Pre-mRNA cleavage complex 2 protein Pcf11	Color2 [A=255, R=169, G=169, B=169]	1	4		16.2022	16.06	16.4334	16.4193	16.3078	16.6634	16.2234	15.8435	16.332	16.7469	16.5305	16.3564
O94915	O94915;Q5TBA9	FRYL_HUMAN	FRYL	Protein furry homolog-like	Color2 [A=255, R=169, G=169, B=169]	1	4		15.5611	15.3563	15.7062	15.6079	15.7473	15.246	15.5422	15.6611	15.2576	15.8069	15.6856	15.5778
O94916	O94916	NFAT5_HUMAN	NFAT5	Nuclear factor of activated T-cells 5	Color2 [A=255, R=169, G=169, B=169]	1	4		15.5216	14.8864	16.0736	15.614	16.0682	16.8967	16.6298	16.8089	16.4536	16.9953	17.3262	17.4457
O94919	O94919	ENDD1_HUMAN	ENDOD1	Endonuclease domain-containing 1 protein	Color2 [A=255, R=169, G=169, B=169]	1	4		13.5448	13.7126	11.4201	14.1164	13.8788	13.2156	13.5054	13.2229	13.3966	12.6946	12.8972	13.9139
O94921	O94921	CDK14_HUMAN	CDK14	Cyclin-dependent kinase 14	Color2 [A=255, R=169, G=169, B=169]	1	4		10.4238	11.5565	14.0718	12.8948	12.2226	13.5076	12.9404	11.7714	12.3924	13.0496	11.685	11.9867
O94921;Q00536	O94921;Q00536	CDK14_HUMAN;CDK16_HUMAN	CDK14;CDK16	Cyclin-dependent kinase 14	Color2 [A=255, R=169, G=169, B=169]	1	4		11.5678	8.04393	10.7344	10.9509	10.3728	12.275	12.0985	10.9011	11.2425	12.9982	12.8818	12.4926
O94923	O94923	GLCE_HUMAN	GLCE	D-glucuronyl C5-epimerase	Color2 [A=255, R=169, G=169, B=169]	1	4		16.5735	16.6653	16.6364	16.6804	16.6662	16.3869	16.7451	16.7494	16.4158	16.474	16.3195	16.2718
O94925	O94925	GLSK_HUMAN	GLS	Glutaminase kidney isoform, mitochondrial	Color2 [A=255, R=169, G=169, B=169]	1	4		23.4537	23.0303	23.1038	23.1735	23.3307	23.0564	23.2759	23.2639	23.3845	22.9364	22.8245	22.6585
O94927	O94927	HAUS5_HUMAN	HAUS5	HAUS augmin-like complex subunit 5	Color2 [A=255, R=169, G=169, B=169]	1	4		14.7155	14.6141	14.8104	14.8361	14.6369	14.4616	14.9375	15.0839	14.0844	15.1147	14.777	14.7044
O94953	O94953	KDM4B_HUMAN	KDM4B	Lysine-specific demethylase 4B	Color2 [A=255, R=169, G=169, B=169]	1	4		15.8031	16.601	16.9266	16.0908	15.7648	15.1854	16.0375	16.0155	15.6324	15.7789	15.8934	16.3801
O94955	O94955	RHBT3_HUMAN	RHOBTB3	Rho-related BTB domain-containing protein 3	Color2 [A=255, R=169, G=169, B=169]	1	4		14.9929	15.4173	15.5086	14.8191	15.5726	15.1311	15.6272	15.4012	15.2139	14.8629	15.4645	15.3914
O94964	O94964	SOGA1_HUMAN	SOGA1	Protein SOGA1	Color2 [A=255, R=169, G=169, B=169]	1	4		15.8059	16.2362	15.982	16.2406	16.6985	17.4866	17.4284	17.085	15.6142	16.7412	16.7759	16.852
O94964;Q5TF21;Q9Y4B5	O94964;Q9Y4B5;Q5TF21	MTCL1_HUMAN;SOGA1_HUMAN;SOGA3_HUMAN	MTCL1;SOGA1;SOGA3	Protein SOGA1	Color2 [A=255, R=169, G=169, B=169]	1	4		10.6128	14.3117	13.8959	11.0827	14.3161	15.2054	15.3992	14.417	12.0447	14.9915	14.2379	14.0785
O94964;Q9Y4B5	O94964;Q9Y4B5	MTCL1_HUMAN;SOGA1_HUMAN	MTCL1;SOGA1	Protein SOGA1	Color2 [A=255, R=169, G=169, B=169]	1	4		10.3384	13.2522	14.1069	10.6836	10.5266	15.9418	16.284	15.2172	14.0318	15.7946	15.4806	16.1316
O94966	O94966	UBP19_HUMAN	USP19	Ubiquitin carboxyl-terminal hydrolase 19	Color2 [A=255, R=169, G=169, B=169]	1	4		15.9938	16.0157	15.7043	16.0813	15.9137	16.0161	16.0811	16.0171	16.1648	16.0919	15.9706	15.9925
O94967	O94967	WDR47_HUMAN	WDR47	WD repeat-containing protein 47	Color2 [A=255, R=169, G=169, B=169]	1	4		13.4739	11.9304	12.2176	12.9829	13.8713	12.6144	13.3931	13.7376	13.4304	13.814	13.0774	13.9347
O94972	O94972	TRI37_HUMAN	TRIM37	E3 ubiquitin-protein ligase TRIM37	Color2 [A=255, R=169, G=169, B=169]	1	4		12.804	12.4436	13.4209	13.8414	13.5427	13.3602	13.2706	13.7666	12.254	13.3736	13.3363	13.5216
O94973	O94973	AP2A2_HUMAN	AP2A2	AP-2 complex subunit alpha-2	Color2 [A=255, R=169, G=169, B=169]	1	4		14.5377	15.4385	14.7428	15.4585	15.0301	15.7504	15.4258	15.8103	15.2916	16.5016	16.5567	16.2967
O94973;O95782	O94973;O95782	AP2A1_HUMAN;AP2A2_HUMAN	AP2A1;AP2A2	AP-2 complex subunit alpha-2	Color2 [A=255, R=169, G=169, B=169]	1	4		16.5888	17.0946	17.1174	17.0605	17.4211	17.6058	17.442	17.4118	17.2796	18.0413	17.9425	17.9651
O94979	O94979	SC31A_HUMAN	SEC31A	Protein transport protein Sec31A	Color2 [A=255, R=169, G=169, B=169]	1	4		15.2569	15.3985	15.6214	15.8238	15.4897	16.025	15.6671	16.0849	15.8595	16.19	16.3935	16.5998
O94985	O94985	CSTN1_HUMAN	CLSTN1	Calsyntenin-1	Color2 [A=255, R=169, G=169, B=169]	1	4		15.4144	15.5885	14.9241	15.6835	15.7932	16.1228	16.1682	16.1935	16.1314	16.232	16.2985	16.0414
O94991	O94991	SLIK5_HUMAN	SLITRK5	SLIT and NTRK-like protein 5	Color2 [A=255, R=169, G=169, B=169]	1	4		14.334	14.4967	14.2886	14.0145	14.1287	13.7729	13.4462	14.0115	13.226	14.2456	14.0593	14.3074
O94992	O94992	HEXI1_HUMAN	HEXIM1	Protein HEXIM1	Color2 [A=255, R=169, G=169, B=169]	1	4		12.061	13.2326	13.5693	11.3697	13.0528	12.4297	12.7758	11.4077	13.2542	12.3566	13.0525	12.6687
O95025	O95025	SEM3D_HUMAN	SEMA3D	Semaphorin-3D	Color2 [A=255, R=169, G=169, B=169]	1	4		13.6939	13.4186	10.6148	11.1028	12.2602	13.5894	12.9527	13.136	13.7911	13.5314	14.4222	15.0608
O95057	O95057	DIRA1_HUMAN	DIRAS1	GTP-binding protein Di-Ras1	Color2 [A=255, R=169, G=169, B=169]	1	4		15.9991	16.0139	16.0151	15.7009	16.4528	16.3892	16.7205	16.3426	16.4832	16.7024	15.8761	16.1962
O95059	O95059	RPP14_HUMAN	RPP14	Ribonuclease P protein subunit p14	Color2 [A=255, R=169, G=169, B=169]	1	4		15.7649	15.8929	16.3507	16.5912	16.2409	16.369	16.0875	15.9371	16.0007	16.3017	16.3909	16.5725
O95067	O95067	CCNB2_HUMAN	CCNB2	G2/mitotic-specific cyclin-B2	Color2 [A=255, R=169, G=169, B=169]	1	4		15.8669	16.0082	16.1779	15.8108	15.5655	15.6665	16.1175	15.8393	15.8604	15.7111	15.8209	16.1054
O95070	O95070	YIF1A_HUMAN	YIF1A	Protein YIF1A	Color2 [A=255, R=169, G=169, B=169]	1	4		17.1649	17.4441	17.1111	16.6558	17.1821	16.7156	16.9595	17.3169	16.8796	16.9742	16.8712	16.7014
O95071	O95071	UBR5_HUMAN	UBR5	E3 ubiquitin-protein ligase UBR5	Color2 [A=255, R=169, G=169, B=169]	1	4		16.4732	17.1506	17.2697	17.3561	17.1626	17.8445	17.5807	17.476	16.8023	17.5838	17.6701	17.6432
O95104	O95104	SCAF4_HUMAN	SCAF4	SR-related and CTD-associated factor 4	Color2 [A=255, R=169, G=169, B=169]	1	4		15.8339	16.331	16.4235	16.8485	16.0453	15.7528	16.3323	15.5945	15.4923	15.9211	15.4271	16.1025
O95104;Q9UPN6	O95104;Q9UPN6	SCAF4_HUMAN;SCAF8_HUMAN	SCAF4;SCAF8	SR-related and CTD-associated factor 4	Color2 [A=255, R=169, G=169, B=169]	1	4		16.6111	17.2004	16.2142	17.12	16.6607	17.0955	16.8652	17.0564	16.8066	17.0712	17.012	16.6578
O95125	O95125	ZN202_HUMAN	ZNF202	Zinc finger protein 202	Color2 [A=255, R=169, G=169, B=169]	1	4		13.6375	15.4787	15.795	16.0843	15.1253	16.7547	16.3274	16.5162	14.6412	16.3697	16.5448	16.3439
O95139	O95139	NDUB6_HUMAN	NDUFB6	NADH dehydrogenase [ubiquinone] 1 beta subcomplex subunit 6	Color2 [A=255, R=169, G=169, B=169]	1	4		16.3918	16.6276	15.874	16.5555	16.1786	16.3881	16.0115	16.7768	16.9407	15.9179	16.2182	15.5624
O95140	O95140	MFN2_HUMAN	MFN2	Mitofusin-2	Color2 [A=255, R=169, G=169, B=169]	1	4		20.3554	20.3693	20.2622	20.3413	20.4942	20.4526	20.4599	20.4627	20.5317	20.3985	20.3087	20.0784
O95140;Q8IWA4	O95140;Q8IWA4	MFN1_HUMAN;MFN2_HUMAN	MFN1;MFN2	Mitofusin-2	Color2 [A=255, R=169, G=169, B=169]	1	4		20.4109	20.4698	20.3777	20.5125	20.4913	20.7897	20.837	20.6331	20.4148	20.5272	20.3569	20.3339
O95147	O95147	DUS14_HUMAN	DUSP14	Dual specificity protein phosphatase 14	Color2 [A=255, R=169, G=169, B=169]	1	4		14.1567	14.675	14.3523	15.4739	12.1876	14.5613	13.4648	13.9868	10.054	13.4837	14.3046	14.1438
O95155	O95155	UBE4B_HUMAN	UBE4B	Ubiquitin conjugation factor E4 B	Color2 [A=255, R=169, G=169, B=169]	1	4		12.3658	13.5128	13.7834	13.7249	14.9612	14.1003	14.2199	14.5612	13.5086	14.2745	14.399	15.1161
O95158	O95158	NXPH4_HUMAN	NXPH4	Neurexophilin-4	Color2 [A=255, R=169, G=169, B=169]	1	4		12.8951	12.8509	11.1979	12.187	12.4222	14.0343	13.6276	13.1488	10.1408	14.5304	13.3167	14.1784
O95159	O95159	ZFPL1_HUMAN	ZFPL1	Zinc finger protein-like 1	Color2 [A=255, R=169, G=169, B=169]	1	4		17.5795	17.5817	17.1791	17.6855	17.7512	17.3266	17.3922	17.3658	17.6151	17.5532	17.5171	17.2053
O95163	O95163	ELP1_HUMAN	ELP1	Elongator complex protein 1	Color2 [A=255, R=169, G=169, B=169]	1	4		13.9543	14.5302	14.5149	14.603	14.5353	15.0282	14.5056	14.8851	14.371	15.2097	15.4061	15.836
O95167	O95167	NDUA3_HUMAN	NDUFA3	NADH dehydrogenase [ubiquinone] 1 alpha subcomplex subunit 3	Color2 [A=255, R=169, G=169, B=169]	1	4		13.4122	10.2065	10.6598	13.3323	13.4551	13.8047	9.98002	14.8173	13.4257	12.9895	10.1327	10.959
O95168	O95168	NDUB4_HUMAN	NDUFB4	NADH dehydrogenase [ubiquinone] 1 beta subcomplex subunit 4	Color2 [A=255, R=169, G=169, B=169]	1	4		20.2412	20.0266	20.1265	20.0095	19.9592	19.8096	19.8618	19.9848	19.9654	19.6703	19.5263	19.398
O95169	O95169	NDUB8_HUMAN	NDUFB8	NADH dehydrogenase [ubiquinone] 1 beta subcomplex subunit 8, mitochondrial	Color2 [A=255, R=169, G=169, B=169]	1	4		17.3288	17.7496	16.9812	17.2134	17.3891	17.1174	17.5272	17.5686	17.285	17.1649	17.178	16.7395
O95178	O95178	NDUB2_HUMAN	NDUFB2	NADH dehydrogenase [ubiquinone] 1 beta subcomplex subunit 2, mitochondrial	Color2 [A=255, R=169, G=169, B=169]	1	4		16.6839	16.3928	16.7689	16.7423	16.1834	16.6852	17.0656	16.5548	15.2703	15.1707	16.0175	16.0343
O95180	O95180	CAC1H_HUMAN	CACNA1H	Voltage-dependent T-type calcium channel subunit alpha-1H	Color2 [A=255, R=169, G=169, B=169]	1	4		12.8655	13.2108	13.4496	13.6036	13.4699	13.9162	14.1644	13.1127	13.0794	14.4941	14.0576	14.2893
O95182	O95182	NDUA7_HUMAN	NDUFA7	NADH dehydrogenase [ubiquinone] 1 alpha subcomplex subunit 7	Color2 [A=255, R=169, G=169, B=169]	1	4		17.3263	17.2654	16.9637	17.293	17.4763	18.0153	17.4182	17.461	17.9631	18.0622	17.7056	18.0438
O95185;Q8IZJ1	O95185;Q8IZJ1	UNC5B_HUMAN;UNC5C_HUMAN	UNC5B;UNC5C	Netrin receptor UNC5C	Color2 [A=255, R=169, G=169, B=169]	1	4		15.3541	15.145	15.5347	15.5908	15.1343	15.4291	15.5421	14.7778	15.0527	15.3325	13.3905	13.2085
O95197	O95197	RTN3_HUMAN	RTN3	Reticulon-3	Color2 [A=255, R=169, G=169, B=169]	1	4		18.2228	18.5557	18.1009	18.5625	18.3901	18.8238	18.6599	18.5498	19.078	18.8526	18.6641	18.6395
O95198	O95198	KLHL2_HUMAN	KLHL2	Kelch-like protein 2	Color2 [A=255, R=169, G=169, B=169]	1	4		11.0276	12.2194	10.8907	12.9623	11.7343	13.3355	11.1213	13.6078	13.7641	13.1436	13.6338	13.7773
O95199	O95199	RCBT2_HUMAN	RCBTB2	RCC1 and BTB domain-containing protein 2	Color2 [A=255, R=169, G=169, B=169]	1	4		12.3474	13.8077	8.83078	10.7163	13.1956	13.5487	10.901	11.3762	10.5473	11.2901	13.6601	12.2937
O95201	O95201	ZN205_HUMAN	ZNF205	Zinc finger protein 205	Color2 [A=255, R=169, G=169, B=169]	1	4		12.9643	13.4022	13.9195	13.3236	12.6776	14.1641	14.3431	14.0335	13.2377	14.414	14.1518	14.2285
O95201;Q8NB50	O95201;Q8NB50	ZFP62_HUMAN;ZN205_HUMAN	ZFP62;ZNF205	Zinc finger protein 205	Color2 [A=255, R=169, G=169, B=169]	1	4		10.0363	13.1223	11.9238	10.5216	11.6002	12.6739	12.3782	10.8374	10.7203	13.3916	12.6407	12.8676
O95202	O95202	LETM1_HUMAN	LETM1	Mitochondrial proton/calcium exchanger protein	Color2 [A=255, R=169, G=169, B=169]	1	4		17.8438	17.5874	17.8993	17.7774	17.6647	17.9104	17.6339	17.4846	17.7221	17.7877	17.7816	18.0078
O95210	O95210	STBD1_HUMAN	STBD1	Starch-binding domain-containing protein 1	Color2 [A=255, R=169, G=169, B=169]	1	4		17.502	17.7093	17.1764	17.4809	17.3893	17.0619	16.9465	17.178	16.7908	16.6665	16.9897	16.6272
O95214	O95214	LERL1_HUMAN	LEPROTL1	Leptin receptor overlapping transcript-like 1	Color2 [A=255, R=169, G=169, B=169]	1	4		11.0073	11.36	11.5816	13.8199	9.9465	8.56455	11.9767	12.6124	13.1912	7.7411	10.3808	11.53
O95218	O95218	ZRAB2_HUMAN	ZRANB2	Zinc finger Ran-binding domain-containing protein 2	Color2 [A=255, R=169, G=169, B=169]	1	4		13.0152	14.0236	14.834	14.4159	14.6995	13.9442	12.3099	14.3994	13.8545	14.5692	14.6957	13.9497
O95219	O95219	SNX4_HUMAN	SNX4	Sorting nexin-4	Color2 [A=255, R=169, G=169, B=169]	1	4		11.0999	11.3377	12.4706	11.5997	12.5051	11.3568	12.9918	12.6844	12.4877	12.8913	12.6712	13.0806
O95229	O95229	ZWINT_HUMAN	ZWINT	ZW10 interactor	Color2 [A=255, R=169, G=169, B=169]	1	4		14.1932	11.9993	14.2746	11.005	12.3719	14.3691	14.1588	12.8025	11.3708	14.9009	14.5534	14.9442
O95232	O95232	LC7L3_HUMAN	LUC7L3	Luc7-like protein 3	Color2 [A=255, R=169, G=169, B=169]	1	4		18.0151	18.0287	18.1727	18.1634	18.25	18.3568	18.3281	18.0572	18.0295	18.2826	18.3533	18.2393
O95235	O95235	KI20A_HUMAN	KIF20A	Kinesin-like protein KIF20A	Color2 [A=255, R=169, G=169, B=169]	1	4		16.514	18.2848	18.3211	18.1017	16.9905	18.4662	18.0556	18.2012	17.039	18.4064	18.3488	18.234
O95239	O95239;Q2VIQ3	KIF4A_HUMAN	KIF4A	Chromosome-associated kinesin KIF4A	Color2 [A=255, R=169, G=169, B=169]	1	4		14.8659	16.1874	16.0392	16.2063	16.2957	17.2896	17.0017	16.9975	15.896	17.0976	17.318	17.3891
O95243	O95243	MBD4_HUMAN	MBD4	Methyl-CpG-binding domain protein 4	Color2 [A=255, R=169, G=169, B=169]	1	4		13.7591	14.7349	14.9796	15.0717	14.1312	14.6642	14.7063	14.3369	13.5691	15.2564	15.315	15.0303
O95248	O95248	MTMR5_HUMAN	SBF1	Myotubularin-related protein 5	Color2 [A=255, R=169, G=169, B=169]	1	4		17.1743	17.2319	17.2133	17.3887	17.3388	17.5491	17.5424	17.4238	17.4409	17.6464	17.4269	17.4022
O95248;Q86WG5	O95248;Q86WG5	MTMR5_HUMAN;MTMRD_HUMAN	SBF1;SBF2	Myotubularin-related protein 5	Color2 [A=255, R=169, G=169, B=169]	1	4		15.1403	15.1192	15.051	15.5208	15.6997	16.0889	16.0757	15.283	15.0617	15.7081	15.5934	15.1261
O95249	O95249	GOSR1_HUMAN	GOSR1	Golgi SNAP receptor complex member 1	Color2 [A=255, R=169, G=169, B=169]	1	4		14.6469	14.7192	15.1017	14.5399	15.0819	14.9874	14.8381	14.3508	14.8423	14.8319	14.4568	14.9604
O95251	O95251	KAT7_HUMAN	KAT7	Histone acetyltransferase KAT7	Color2 [A=255, R=169, G=169, B=169]	1	4		17.292	17.8893	17.9672	17.8401	17.5234	18.0611	17.8892	18.0667	17.3488	18.1295	18.016	17.9581
O95251;Q8WYB5;Q9H7Z6	O95251;Q8WYB5;Q9H7Z6	KAT6B_HUMAN;KAT7_HUMAN;KAT8_HUMAN	KAT6B;KAT7;KAT8	Histone acetyltransferase KAT7	Color2 [A=255, R=169, G=169, B=169]	1	4		14.5427	16.1532	15.7698	16.2476	15.4599	16.6298	15.9617	15.8702	15.522	15.8389	16.0951	16.0081
O95258	O95258	UCP5_HUMAN	SLC25A14	Brain mitochondrial carrier protein 1	Color2 [A=255, R=169, G=169, B=169]	1	4		16.159	16.4146	16.1958	16.3181	17.1987	16.821	17.0725	17.1151	17.4206	17.0142	16.8685	16.6701
O95258;Q5SVS4	O95258;Q5SVS4	KMCP1_HUMAN;UCP5_HUMAN	SLC25A14;SLC25A30	Brain mitochondrial carrier protein 1	Color2 [A=255, R=169, G=169, B=169]	1	4		15.7353	15.369	14.9908	14.9354	15.6546	15.2338	15.5968	15.1438	15.1586	14.8697	14.7458	14.6678
O95263	O95263	PDE8B_HUMAN	PDE8B	High affinity cAMP-specific and IBMX-insensitive 3',5'-cyclic phosphodiesterase 8B	Color2 [A=255, R=169, G=169, B=169]	1	4		9.09357	13.9194	12.9807	13.8301	14.9083	13.509	14.5499	14.7597	14.3226	14.1243	13.9168	14.7927
O95271	O95271	TNKS1_HUMAN	TNKS	Poly [ADP-ribose] polymerase tankyrase-1	Color2 [A=255, R=169, G=169, B=169]	1	4		12.1808	11.8012	12.9103	12.751	11.4634	12.7415	12.4478	12.5219	11.2903	10.9339	12.5702	11.6343
O95271;Q9H2K2	O95271;Q9H2K2	TNKS1_HUMAN;TNKS2_HUMAN	TNKS;TNKS2	Poly [ADP-ribose] polymerase tankyrase-1	Color2 [A=255, R=169, G=169, B=169]	1	4		10.5339	12.4036	12.4312	11.9113	12.3747	12.8505	11.6607	13.3255	11.3962	12.3243	12.6522	10.9487
O95292	O95292	VAPB_HUMAN	VAPB	Vesicle-associated membrane protein-associated protein B/C	Color2 [A=255, R=169, G=169, B=169]	1	4		19.5607	19.6743	19.8299	19.6415	19.7465	19.7524	19.6998	19.6772	20.0018	19.8736	19.8649	19.8448
O95292;Q9P0L0	O95292;Q9P0L0	VAPA_HUMAN;VAPB_HUMAN	VAPA;VAPB	Vesicle-associated membrane protein-associated protein B/C	Color2 [A=255, R=169, G=169, B=169]	1	4		19.1491	18.9219	19.2024	19.2563	18.7311	19.8109	18.5124	19.6346	19.5011	18.3803	19.3405	18.7588
O95295	O95295	SNAPN_HUMAN	SNAPIN	SNARE-associated protein Snapin	Color2 [A=255, R=169, G=169, B=169]	1	4		14.7425	13.9057	15.0311	15.216	15.4678	15.0501	14.9802	14.9505	15.5119	15.5493	15.763	15.7743
O95297	O95297	MPZL1_HUMAN	MPZL1	Myelin protein zero-like protein 1	Color2 [A=255, R=169, G=169, B=169]	1	4		15.6938	15.8723	15.6527	15.7372	15.4981	16.2295	15.347	16.0268	15.5915	15.8724	15.4377	15.9251
O95298	O95298	NDUC2_HUMAN	NDUFC2	NADH dehydrogenase [ubiquinone] 1 subunit C2	Color2 [A=255, R=169, G=169, B=169]	1	4		17.1607	17.4271	16.4243	17.9069	17.2449	17.0569	16.9668	17.3012	17.2963	16.9573	16.9643	16.8704
O95299	O95299	NDUAA_HUMAN	NDUFA10	NADH dehydrogenase [ubiquinone] 1 alpha subcomplex subunit 10, mitochondrial	Color2 [A=255, R=169, G=169, B=169]	1	4		22.586	22.2645	22.2509	22.133	22.3804	22.1891	22.2925	22.303	22.35	21.7846	21.5489	21.3967
O95302	O95302	FKBP9_HUMAN	FKBP9	Peptidyl-prolyl cis-trans isomerase FKBP9	Color2 [A=255, R=169, G=169, B=169]	1	4		14.8118	13.7103	14.8125	14.4545	15.0918	15.8517	15.11	15.4226	13.9329	16.3231	16.4108	16.5912
O95319	O95319	CELF2_HUMAN	CELF2	CUGBP Elav-like family member 2	Color2 [A=255, R=169, G=169, B=169]	1	4		12.5637	13.1419	12.6228	14.0364	13.3654	12.948	13.4071	12.0888	13.4953	14.075	13.2729	13.6626
O95319;Q92879	O95319;Q92879	CELF1_HUMAN;CELF2_HUMAN	CELF1;CELF2	CUGBP Elav-like family member 2	Color2 [A=255, R=169, G=169, B=169]	1	4		14.8541	14.4997	14.9441	14.9348	13.1666	13.0026	10.0539	15.1053	14.1868	14.0623	12.1115	12.0008
O95343	O95343	SIX3_HUMAN	SIX3	Homeobox protein SIX3	Color2 [A=255, R=169, G=169, B=169]	1	4		15.0034	15.2404	15.4811	15.5938	15.119	16.2575	16.5455	15.3158	15.8145	15.7572	16.479	16.4165
O95343;O95475	O95343;O95475	SIX3_HUMAN;SIX6_HUMAN	SIX3;SIX6	Homeobox protein SIX3	Color2 [A=255, R=169, G=169, B=169]	1	4		13.6672	13.8427	12.755	13.6611	14.1848	14.9935	15.1281	15.2853	14.4766	15.2952	15.4623	15.3446
O95347	O95347	SMC2_HUMAN	SMC2	Structural maintenance of chromosomes protein 2	Color2 [A=255, R=169, G=169, B=169]	1	4		16.3668	16.6319	16.8295	16.8471	16.2251	16.9158	16.6313	16.4853	16.4909	16.8763	16.7984	16.9555
O95359	O95359	TACC2_HUMAN	TACC2	Transforming acidic coiled-coil-containing protein 2	Color2 [A=255, R=169, G=169, B=169]	1	4		14.9637	13.7031	10.866	14.8763	15.4895	14.8967	15.5551	14.5005	16.5903	16.6847	15.3049	15.6599
O95363	O95363	SYFM_HUMAN	FARS2	Phenylalanine--tRNA ligase, mitochondrial	Color2 [A=255, R=169, G=169, B=169]	1	4		21.8263	21.5489	21.5806	21.6699	21.7193	21.5506	21.6232	21.6493	21.7492	21.2276	21.1627	20.9494
O95365	O95365	ZBT7A_HUMAN	ZBTB7A	Zinc finger and BTB domain-containing protein 7A	Color2 [A=255, R=169, G=169, B=169]	1	4		15.2081	15.6767	15.7137	15.8184	15.724	16.4148	15.9613	15.9056	14.9638	16.1937	16.6175	15.8615
O95372	O95372	LYPA2_HUMAN	LYPLA2	Acyl-protein thioesterase 2	Color2 [A=255, R=169, G=169, B=169]	1	4		15.537	16.5331	15.1164	15.8028	15.7284	15.7031	16.1926	16.2767	15.9055	16.5585	16.6425	16.7955
O95373	O95373	IPO7_HUMAN	IPO7	Importin-7	Color2 [A=255, R=169, G=169, B=169]	1	4		14.6255	15.6751	15.2421	15.7687	15.3222	16.0502	15.9679	15.673	14.9668	15.8164	15.9917	16.0847
O95376	O95376	ARI2_HUMAN	ARIH2	E3 ubiquitin-protein ligase ARIH2	Color2 [A=255, R=169, G=169, B=169]	1	4		11.0235	11.0285	11.9287	11.6145	12.5003	12.1746	10.8668	11.7931	11.98	11.2752	12.1482	12.2189
O95382	O95382	M3K6_HUMAN	MAP3K6	Mitogen-activated protein kinase kinase kinase 6	Color2 [A=255, R=169, G=169, B=169]	1	4		11.26	12.1593	9.83074	14.0625	12.7241	11.3025	11.8163	10.977	10.8544	12.881	12.1899	12.8778
O95390	O95390	GDF11_HUMAN	GDF11	Growth/differentiation factor 11	Color2 [A=255, R=169, G=169, B=169]	1	4		10.7374	11.9495	11.1209	11.5263	11.7312	13.7228	11.9742	12.5168	10.8593	11.3745	12.2415	12.0863
O95391	O95391	SLU7_HUMAN	SLU7	Pre-mRNA-splicing factor SLU7	Color2 [A=255, R=169, G=169, B=169]	1	4		14.7561	15.1435	15.2752	15.15	15.0866	15.0706	15.4768	15.391	15.3866	15.8797	15.7575	15.5902
O95394	O95394	AGM1_HUMAN	PGM3	Phosphoacetylglucosamine mutase	Color2 [A=255, R=169, G=169, B=169]	1	4		10.5557	11.5806	11.7197	10.3196	9.16009	10.5866	10.7069	12.5028	9.86859	11.1107	10.4066	11.8124
O95396	O95396	MOCS3_HUMAN	MOCS3	Adenylyltransferase and sulfurtransferase MOCS3	Color2 [A=255, R=169, G=169, B=169]	1	4		12.4582	13.2027	13.3675	10.5822	11.2567	13.0414	12.1492	12.7859	12.6083	12.3296	11.9317	13.9864
O95400	O95400	CD2B2_HUMAN	CD2BP2	CD2 antigen cytoplasmic tail-binding protein 2	Color2 [A=255, R=169, G=169, B=169]	1	4		16.1442	15.9076	16.739	15.9602	15.6673	15.8826	16.2954	15.7674	15.8556	16.5657	15.8893	15.8963
O95402	O95402	MED26_HUMAN	MED26	Mediator of RNA polymerase II transcription subunit 26	Color2 [A=255, R=169, G=169, B=169]	1	4		15.0905	15.0571	15.7794	15.347	15.4162	16.3545	15.8183	15.3073	15.5055	16.323	16.1771	16.3058
O95409	O95409	ZIC2_HUMAN	ZIC2	Zinc finger protein ZIC 2	Color2 [A=255, R=169, G=169, B=169]	1	4		16.2478	16.7709	16.8509	17.4939	15.9843	16.9246	16.388	17.3187	15.488	16.8066	16.6074	16.8923
O95409;Q96T25	O60481;O95409;Q15915;Q8N9L1;Q96T25	ZIC2_HUMAN;ZIC5_HUMAN	ZIC2;ZIC5	Zinc finger protein ZIC 2	Color2 [A=255, R=169, G=169, B=169]	1	4		13.5427	14.4033	14.32	14.692	14.2126	14.6646	14.5905	14.6028	13.8968	15.0389	14.4353	14.5911
O95415	O95415	BRI3_HUMAN	BRI3	Brain protein I3	Color2 [A=255, R=169, G=169, B=169]	1	4		14.2974	14.5955	15.1683	14.7979	14.0718	14.389	13.8914	14.1793	15.0975	14.3675	14.3597	14.5265
O95425	O95425	SVIL_HUMAN	SVIL	Supervillin	Color2 [A=255, R=169, G=169, B=169]	1	4		14.902	15.132	14.9023	15.2231	15.2407	15.4247	15.3222	15.1173	15.5432	16.0763	16.0295	15.5616
O95427	O95427	PIGN_HUMAN	PIGN	GPI ethanolamine phosphate transferase 1	Color2 [A=255, R=169, G=169, B=169]	1	4		11.537	12.2406	12.2486	11.1801	11.2975	11.9972	12.069	11.8067	12.361	11.8771	12.7784	12.8148
O95429	O95429	BAG4_HUMAN	BAG4	BAG family molecular chaperone regulator 4	Color2 [A=255, R=169, G=169, B=169]	1	4		10.5416	10.1077	12.4259	11.4389	12.2759	11.6943	12.0913	11.1767	12.0542	12.0085	12.2989	11.8747
O95433	O95433	AHSA1_HUMAN	AHSA1	Activator of 90 kDa heat shock protein ATPase homolog 1	Color2 [A=255, R=169, G=169, B=169]	1	4		14.8148	15.2622	15.1335	15.7068	15.6191	15.869	15.1711	15.8719	15.0848	15.9177	16.0939	16.6581
O95445	O95445	APOM_HUMAN	APOM	Apolipoprotein M	Color2 [A=255, R=169, G=169, B=169]	1	4		14.1027	14.7531	13.3184	15.3448	15.1675	15.5185	15.7348	15.8223	13.6766	15.6094	16.1423	16.5671
O95453	O95453	PARN_HUMAN	PARN	Poly(A)-specific ribonuclease PARN	Color2 [A=255, R=169, G=169, B=169]	1	4		16.3971	16.8485	16.858	17.1929	16.8876	17.1687	17.067	17.1299	17.231	17.5916	17.4606	17.1832
O95456	O95456	PSMG1_HUMAN	PSMG1	Proteasome assembly chaperone 1	Color2 [A=255, R=169, G=169, B=169]	1	4		14.2401	15.0023	13.7295	14.6376	15.4282	14.9442	14.9055	14.7424	14.3479	15.2376	15.4167	15.6912
O95470	O95470	SGPL1_HUMAN	SGPL1	Sphingosine-1-phosphate lyase 1	Color2 [A=255, R=169, G=169, B=169]	1	4		19.2797	19.4232	19.4527	19.2382	19.3515	19.1246	19.3716	19.4199	19.4544	19.2911	19.3409	19.144
O95475	O95475	SIX6_HUMAN	SIX6	Homeobox protein SIX6	Color2 [A=255, R=169, G=169, B=169]	1	4		9.11078	11.4388	11.0777	12.0247	14.4608	13.9938	14.739	14.8367	13.8271	14.5112	14.6651	14.5112
O95476	O95476	CNEP1_HUMAN	CTDNEP1	CTD nuclear envelope phosphatase 1	Color2 [A=255, R=169, G=169, B=169]	1	4		16.237	16.4557	16.3167	15.9878	16.0865	16.0966	16.3144	16.5577	16.0798	15.4302	15.9276	15.6537
O95478	O95478	NSA2_HUMAN	NSA2	Ribosome biogenesis protein NSA2 homolog	Color2 [A=255, R=169, G=169, B=169]	1	4		20.2279	20.2979	20.1743	20.2698	19.97	20.1672	20.1867	20.1354	19.995	20.0923	19.9933	19.8579
O95479	O95479	G6PE_HUMAN	H6PD	GDH/6PGL endoplasmic bifunctional protein	Color2 [A=255, R=169, G=169, B=169]	1	4		9.65184	15.3345	12.6508	14.3675	14.8474	14.2956	11.8861	11.5745	12.8121	12.7504	10.7177	13.9549
O95486	O95486	SC24A_HUMAN	SEC24A	Protein transport protein Sec24A	Color2 [A=255, R=169, G=169, B=169]	1	4		9.44543	10.9784	13.4236	12.0407	12.0255	11.98	13.3623	12.3672	12.743	13.4246	12.9912	13.4507
O95487	O95487	SC24B_HUMAN	SEC24B	Protein transport protein Sec24B	Color2 [A=255, R=169, G=169, B=169]	1	4		10.9535	12.7109	12.0452	12.29	13.8967	12.586	13.8883	12.0883	13.0357	13.6855	14.1041	13.7765
O95490	O95490	AGRL2_HUMAN	ADGRL2	Adhesion G protein-coupled receptor L2	Color2 [A=255, R=169, G=169, B=169]	1	4		16.095	15.9978	15.943	16.19	15.7554	15.787	16.1357	15.7492	15.7929	16.1062	15.8044	15.862
O95502	O95502	NPTXR_HUMAN	NPTXR	Neuronal pentraxin receptor	Color2 [A=255, R=169, G=169, B=169]	1	4		11.8101	9.92306	11.0265	10.8758	13.1102	12.5814	12.9395	13.0105	11.8559	13.3064	13.5263	12.8305
O95503	O95503	CBX6_HUMAN	CBX6	Chromobox protein homolog 6	Color2 [A=255, R=169, G=169, B=169]	1	4		16.2246	17.1881	17.0917	17.3053	14.3563	17.2794	16.7766	16.5996	14.0671	16.3407	15.6599	15.4237
O95551	O95551	TYDP2_HUMAN	TDP2	Tyrosyl-DNA phosphodiesterase 2	Color2 [A=255, R=169, G=169, B=169]	1	4		11.8269	12.6993	11.1463	11.9671	12.3934	13.3745	11.6269	13.7763	13.7364	13.8013	12.598	13.487
O95562	O95562	SFT2B_HUMAN	SFT2D2	Vesicle transport protein SFT2B	Color2 [A=255, R=169, G=169, B=169]	1	4		11.8133	11.863	11.4823	13.1043	12.01	12.0016	10.7016	10.8167	11.3053	11.8018	11.8828	12.8416
O95563	O95563	MPC2_HUMAN	MPC2	Mitochondrial pyruvate carrier 2	Color2 [A=255, R=169, G=169, B=169]	1	4		19.2856	19.3692	19.1971	19.3468	19.2986	19.4259	19.471	19.5529	19.5821	19.4204	19.2392	19.4728
O95571	O95571	ETHE1_HUMAN	ETHE1	Persulfide dioxygenase ETHE1, mitochondrial	Color2 [A=255, R=169, G=169, B=169]	1	4		19.8352	19.6085	19.6794	19.7152	19.9905	19.805	19.8697	19.9641	20.3932	19.965	20.0072	19.9065
O95573	O95573	ACSL3_HUMAN	ACSL3	Fatty acid CoA ligase Acsl3	Color2 [A=255, R=169, G=169, B=169]	1	4		20.3622	20.4942	20.3698	20.327	20.6327	20.5471	20.623	20.6734	20.6322	20.4361	20.4072	20.3167
O95602	O95602	RPA1_HUMAN	POLR1A	DNA-directed RNA polymerase I subunit RPA1	Color2 [A=255, R=169, G=169, B=169]	1	4		17.8206	18.415	18.402	18.4437	18.7933	18.9678	18.7264	18.9293	18.3266	18.8933	18.9327	18.9498
O95613	O95613	PCNT_HUMAN	PCNT	Pericentrin	Color2 [A=255, R=169, G=169, B=169]	1	4		15.5768	14.2923	14.5037	14.6197	15.4979	14.7537	14.4	14.2438	15.2101	14.9509	14.7145	15.1461
O95619	O95619	YETS4_HUMAN	YEATS4	YEATS domain-containing protein 4	Color2 [A=255, R=169, G=169, B=169]	1	4		17.1808	17.6414	17.5069	17.8812	17.8085	18.5111	17.7957	17.7135	17.9178	18.4427	18.5467	18.3435
O95625	O95625	ZBT11_HUMAN	ZBTB11	Zinc finger and BTB domain-containing protein 11	Color2 [A=255, R=169, G=169, B=169]	1	4		12.585	14.6801	14.9374	14.6273	13.8025	14.8829	14.5351	14.4856	12.1496	14.8008	14.3027	14.3801
O95630	O95630	STABP_HUMAN	STAMBP	STAM-binding protein	Color2 [A=255, R=169, G=169, B=169]	1	4		15.2599	13.1681	13.7477	12.6077	12.5617	13.1886	12.1256	13.9264	12.4643	14.2662	13.9023	13.6452
O95639	O95639	CPSF4_HUMAN	CPSF4	Cleavage and polyadenylation specificity factor subunit 4	Color2 [A=255, R=169, G=169, B=169]	1	4		18.3479	18.3085	18.3047	18.3704	18.2838	18.2838	18.0199	18.196	18.5633	18.4818	18.3593	18.1267
O95644	O95644	NFAC1_HUMAN	NFATC1	Nuclear factor of activated T-cells, cytoplasmic 1	Color2 [A=255, R=169, G=169, B=169]	1	4		9.88173	11.1741	11.8573	9.60893	14.5477	14.8584	14.4434	14.2912	13.9405	15.7088	15.353	15.2875
O95644;Q12968	O95644;Q12968;Q14934	NFAC1_HUMAN;NFAC3_HUMAN	NFATC1;NFATC3	Nuclear factor of activated T-cells, cytoplasmic 1	Color2 [A=255, R=169, G=169, B=169]	1	4		10.6099	10.3666	10.3627	10.9682	12.0521	15.0794	12.0485	14.9437	8.59467	11.7113	9.5503	11.6165
O95671	O95671	ASML_HUMAN	ASMTL	Probable bifunctional dTTP/UTP pyrophosphatase/methyltransferase protein	Color2 [A=255, R=169, G=169, B=169]	1	4		14.2456	14.3801	14.2431	14.7111	14.1109	13.9562	14.0471	14.3552	14.444	14.5497	14.6065	14.5993
O95674	O95674	CDS2_HUMAN	CDS2	Phosphatidate cytidylyltransferase 2	Color2 [A=255, R=169, G=169, B=169]	1	4		15.8879	16.1226	16.2718	15.7278	16.1889	16.6282	16.5868	16.603	16.494	16.6967	16.6144	16.4095
O95674;Q92903	O95674;Q92903	CDS1_HUMAN;CDS2_HUMAN	CDS1;CDS2	Phosphatidate cytidylyltransferase 2	Color2 [A=255, R=169, G=169, B=169]	1	4		13.8776	13.9515	13.2558	14.441	13.8075	14.097	14.5947	15.1403	15.1569	13.8037	14.1696	14.0696
O95677	O95677	EYA4_HUMAN	EYA4	Eyes absent homolog 4	Color2 [A=255, R=169, G=169, B=169]	1	4		13.5297	14.0753	15.2843	14.7758	13.9222	15.1244	14.998	14.4885	14.0308	14.5064	15.2649	14.4754
O95677;Q99502	O95677;Q99502	EYA1_HUMAN;EYA4_HUMAN	EYA1;EYA4	Eyes absent homolog 4	Color2 [A=255, R=169, G=169, B=169]	1	4		10.3795	12.4019	12.0929	13.6016	11.364	13.8705	13.9269	13.258	12.14	12.2143	11.7048	13.5211
O95678	O95678	K2C75_HUMAN	KRT75	Keratin, type II cytoskeletal 75	Color2 [A=255, R=169, G=169, B=169]	1	4		13.3867	13.5962	15.7527	15.2967	16.3062	10.8629	13.4652	11.7581	10.3949	10.5328	13.6595	11.2046
O95678;P02538;P04259;P04264;P05787;P12035;P13647;P35908;P48668;Q01546;Q5XKE5;Q7Z794	O95678;P02538;P04259;P04264;P05787;P12035;P13647;P35908;P48668;Q01546;Q5XKE5;Q7Z794	K22E_HUMAN;K22O_HUMAN;K2C1B_HUMAN;K2C1_HUMAN;K2C3_HUMAN;K2C5_HUMAN;K2C6A_HUMAN;K2C6B_HUMAN;K2C6C_HUMAN;K2C75_HUMAN;K2C79_HUMAN;K2C8_HUMAN	KRT1;KRT2;KRT3;KRT5;KRT6A;KRT6B;KRT6C;KRT75;KRT76;KRT77;KRT79;KRT8	Keratin, type II cytoskeletal 75	Color2 [A=255, R=169, G=169, B=169]	1	4		10.6242	15.8346	12.3858	17.8183	13.9289	15.2015	15.2372	13.5183	16.4361	15.168	11.1776	12.5859
O95678;P02538;P04259;P04264;P05787;P12035;P13647;P35908;P48668;Q01546;Q7Z794	O95678;P02538;P04259;P04264;P05787;P12035;P13647;P35908;P48668;Q01546;Q7Z794	K22E_HUMAN;K22O_HUMAN;K2C1B_HUMAN;K2C1_HUMAN;K2C3_HUMAN;K2C5_HUMAN;K2C6A_HUMAN;K2C6B_HUMAN;K2C6C_HUMAN;K2C75_HUMAN;K2C8_HUMAN	KRT1;KRT2;KRT3;KRT5;KRT6A;KRT6B;KRT6C;KRT75;KRT76;KRT77;KRT8	Keratin, type II cytoskeletal 75	Color2 [A=255, R=169, G=169, B=169]	1	4		17.6382	17.6777	17.9368	19.1648	17.2975	16.8938	16.947	17.0949	17.9386	16.4489	16.9596	16.1799
O95678;P02538;P04259;P05787;P12035;P13647;P19013;P35908;P48668;Q01546;Q14CN4;Q3SY84;Q5XKE5;Q7Z794;Q86Y46;Q9NSB2	O95678;P02538;P04259;P05787;P08729;P12035;P13647;P19013;P35908;P48668;Q01546;Q14CN4;Q3SY84;Q5XKE5;Q7RTS7;Q7Z794;Q86Y46;Q9NSB2	K22E_HUMAN;K22O_HUMAN;K2C1B_HUMAN;K2C3_HUMAN;K2C4_HUMAN;K2C5_HUMAN;K2C6A_HUMAN;K2C6B_HUMAN;K2C6C_HUMAN;K2C71_HUMAN;K2C72_HUMAN;K2C73_HUMAN;K2C75_HUMAN;K2C79_HUMAN;K2C8_HUMAN;KRT84_HUMAN	KRT2;KRT3;KRT4;KRT5;KRT6A;KRT6B;KRT6C;KRT71;KRT72;KRT73;KRT75;KRT76;KRT77;KRT79;KRT8;KRT84	Keratin, type II cytoskeletal 75	Color2 [A=255, R=169, G=169, B=169]	1	4		23.9529	24.1422	24.0336	25.3739	23.9989	23.4675	23.6943	23.7521	24.2196	23.0415	23.5671	23.1029
O95678;P02538;P04259;P05787;P12035;P13647;P35908;P48668;Q01546;Q14CN4;Q3SY84;Q5XKE5;Q7Z794;Q86Y46;Q9NSB2	O95678;P02538;P04259;P05787;P08729;P12035;P13647;P35908;P48668;Q01546;Q14CN4;Q3SY84;Q5XKE5;Q7RTS7;Q7Z794;Q86Y46;Q9NSB2	K22E_HUMAN;K22O_HUMAN;K2C1B_HUMAN;K2C3_HUMAN;K2C5_HUMAN;K2C6A_HUMAN;K2C6B_HUMAN;K2C6C_HUMAN;K2C71_HUMAN;K2C72_HUMAN;K2C73_HUMAN;K2C75_HUMAN;K2C79_HUMAN;K2C8_HUMAN;KRT84_HUMAN	KRT2;KRT3;KRT5;KRT6A;KRT6B;KRT6C;KRT71;KRT72;KRT73;KRT75;KRT76;KRT77;KRT79;KRT8;KRT84	Keratin, type II cytoskeletal 75	Color2 [A=255, R=169, G=169, B=169]	1	4		20.5161	20.9089	21.0663	21.5622	19.8321	19.3937	19.655	19.8548	20.2891	19.1199	20.0354	19.5138
O95678;P02538;P04259;P05787;P12035;P13647;P35908;P48668;Q01546;Q5XKE5;Q9NSB2	O95678;P02538;P04259;P05787;P08729;P12035;P13647;P35908;P48668;Q01546;Q5XKE5;Q9NSB2	K22E_HUMAN;K22O_HUMAN;K2C3_HUMAN;K2C5_HUMAN;K2C6A_HUMAN;K2C6B_HUMAN;K2C6C_HUMAN;K2C75_HUMAN;K2C79_HUMAN;K2C8_HUMAN;KRT84_HUMAN	KRT2;KRT3;KRT5;KRT6A;KRT6B;KRT6C;KRT75;KRT76;KRT79;KRT8;KRT84	Keratin, type II cytoskeletal 75	Color2 [A=255, R=169, G=169, B=169]	1	4		14.7835	16.9128	16.3554	17.2428	16.5107	15.7973	16.3802	16.0712	16.1869	14.4264	15.6218	15.7296
O95678;P02538;P04259;P12035;P13647;P35908;P48668;Q01546;Q5XKE5	O95678;P02538;P04259;P12035;P13647;P35908;P48668;Q01546;Q5XKE5	K22E_HUMAN;K22O_HUMAN;K2C3_HUMAN;K2C5_HUMAN;K2C6A_HUMAN;K2C6B_HUMAN;K2C6C_HUMAN;K2C75_HUMAN;K2C79_HUMAN	KRT2;KRT3;KRT5;KRT6A;KRT6B;KRT6C;KRT75;KRT76;KRT79	Keratin, type II cytoskeletal 75	Color2 [A=255, R=169, G=169, B=169]	1	4		21.2067	21.3072	21.2866	21.6212	20.0694	19.3819	20.4309	20.1389	20.9279	18.982	19.8015	19.2363
O95678;P02538;P04259;P12036;P13647;P35908;P48668;Q01546;Q86Y46	O95678;P02538;P04259;P12036;P13647;P35908;P48668;Q01546;Q7RTS7;Q86Y46	K22E_HUMAN;K22O_HUMAN;K2C5_HUMAN;K2C6A_HUMAN;K2C6B_HUMAN;K2C6C_HUMAN;K2C73_HUMAN;K2C75_HUMAN;NFH_HUMAN	KRT2;KRT5;KRT6A;KRT6B;KRT6C;KRT73;KRT75;KRT76;NEFH	Keratin, type II cytoskeletal 75	Color2 [A=255, R=169, G=169, B=169]	1	4		18.9962	19.0376	19.1423	20.07	18.6631	18.267	18.5081	18.725	19.174	18.0725	18.6421	18.1844
O95678;P02538;P04259;P12036;P13647;P35908;P48668;Q01546;Q86Y46;Q8N1N4	O95678;P02538;P04259;P12036;P13647;P35908;P48668;Q01546;Q7RTS7;Q86Y46;Q8N1N4	K22E_HUMAN;K22O_HUMAN;K2C5_HUMAN;K2C6A_HUMAN;K2C6B_HUMAN;K2C6C_HUMAN;K2C73_HUMAN;K2C75_HUMAN;K2C78_HUMAN;NFH_HUMAN	KRT2;KRT5;KRT6A;KRT6B;KRT6C;KRT73;KRT75;KRT76;KRT78;NEFH	Keratin, type II cytoskeletal 75	Color2 [A=255, R=169, G=169, B=169]	1	4		19.78	19.7945	20.2687	21.2378	19.3671	19.2515	19.5573	19.5339	19.9315	18.6692	19.3918	19.4464
O95678;P02538;P04259;P13647;P35908;P48668;Q5XKE5	O95678;P02538;P04259;P13647;P35908;P48668;Q5XKE5	K22E_HUMAN;K2C5_HUMAN;K2C6A_HUMAN;K2C6B_HUMAN;K2C6C_HUMAN;K2C75_HUMAN;K2C79_HUMAN	KRT2;KRT5;KRT6A;KRT6B;KRT6C;KRT75;KRT79	Keratin, type II cytoskeletal 75	Color2 [A=255, R=169, G=169, B=169]	1	4		23.8504	23.9205	24.2777	24.5603	23.8539	23.525	23.4604	23.6023	23.8408	22.9671	23.5137	23.2172
O95678;P02538;P04259;P13647;P48668;Q14CN4	O95678;P02538;P04259;P13647;P48668;Q14CN4	K2C5_HUMAN;K2C6A_HUMAN;K2C6B_HUMAN;K2C6C_HUMAN;K2C72_HUMAN;K2C75_HUMAN	KRT5;KRT6A;KRT6B;KRT6C;KRT72;KRT75	Keratin, type II cytoskeletal 75	Color2 [A=255, R=169, G=169, B=169]	1	4		19.0067	18.1025	19.7768	20.7902	18.8043	17.5494	18.8562	19.0066	19.4213	17.6064	18.1853	17.8498
O95678;P02538;P04259;P48668	O95678;P02538;P04259;P48668	K2C6A_HUMAN;K2C6B_HUMAN;K2C6C_HUMAN;K2C75_HUMAN	KRT6A;KRT6B;KRT6C;KRT75	Keratin, type II cytoskeletal 75	Color2 [A=255, R=169, G=169, B=169]	1	4		15.944	15.9594	16.6473	19.257	17.332	15.694	16.75	15.506	16.2906	15.0223	15.4739	15.7353
O95678;P02538;P48668	O95678;P02538;P48668	K2C6A_HUMAN;K2C6C_HUMAN;K2C75_HUMAN	KRT6A;KRT6C;KRT75	Keratin, type II cytoskeletal 75	Color2 [A=255, R=169, G=169, B=169]	1	4		18.8026	18.3768	18.7502	20.5536	18.1518	17.3051	18.8857	16.7739	17.8377	16.1708	16.7159	17.0908
O95678;P13647	O95678;P08729;P13647	K2C5_HUMAN;K2C75_HUMAN	KRT5;KRT75	Keratin, type II cytoskeletal 75	Color2 [A=255, R=169, G=169, B=169]	1	4		16.9324	16.5336	16.6832	17.9322	15.6752	16.025	16.3343	15.613	15.8521	11.675	15.3764	15.7875
O95684	O95684	CEP43_HUMAN	CEP43	Centrosomal protein 43	Color2 [A=255, R=169, G=169, B=169]	1	4		13.6197	12.7803	13.5664	14.2165	11.7583	13.6578	13.0184	12.6406	13.8776	13.4116	12.7782	11.0508
O95685	O95685	PPR3D_HUMAN	PPP1R3D	Protein phosphatase 1 regulatory subunit 3D	Color2 [A=255, R=169, G=169, B=169]	1	4		12.076	13.1103	12.6541	13.9843	14.5385	14.1076	14.7392	15.1313	13.6498	14.3828	15.3283	15.4095
O95696	O95696	BRD1_HUMAN	BRD1	Bromodomain-containing protein 1	Color2 [A=255, R=169, G=169, B=169]	1	4		17.6112	18.7632	18.6802	18.6872	17.9977	19.1397	18.7151	18.8104	17.9868	19.062	19.0759	19.0044
O95696;Q9ULD4	O95696;Q9ULD4	BRD1_HUMAN;BRPF3_HUMAN	BRD1;BRPF3	Bromodomain-containing protein 1	Color2 [A=255, R=169, G=169, B=169]	1	4		13.9987	14.7746	14.8363	14.7545	14.4478	15.7751	13.7063	15.1867	14.6002	14.8127	15.8014	15.4194
O95707	O95707	RPP29_HUMAN	POP4	Ribonuclease P protein subunit p29	Color2 [A=255, R=169, G=169, B=169]	1	4		16.5918	16.9742	16.9917	16.7977	16.836	16.7877	17.0898	16.8111	16.7912	16.7427	16.8478	16.8266
O95714	O95714	HERC2_HUMAN	HERC2	E3 ubiquitin-protein ligase HERC2	Color2 [A=255, R=169, G=169, B=169]	1	4		17.1235	17.4187	17.2628	17.4429	17.2364	17.6898	17.6392	17.6349	17.185	17.5418	17.3966	17.3173
O95716	O95716	RAB3D_HUMAN	RAB3D	Ras-related protein Rab-3D	Color2 [A=255, R=169, G=169, B=169]	1	4		15.3042	15.6215	15.2481	15.7943	16.0035	16.1616	15.3722	16.0754	15.9732	15.5289	15.6031	14.9827
O95716;P20336	O95716;P20336	RAB3A_HUMAN;RAB3D_HUMAN	RAB3A;RAB3D	Ras-related protein Rab-3D	Color2 [A=255, R=169, G=169, B=169]	1	4		20.0632	18.7655	18.9753	19.3788	18.3299	19.3225	20.2806	19.7086	19.1267	18.6293	19.4815	19.0934
O95716;P20336;P20337;P51153;P61006;Q92930;Q96E17	O95716;P20336;P20337;P51153;P61006;Q92930;Q96E17	RAB13_HUMAN;RAB3A_HUMAN;RAB3B_HUMAN;RAB3C_HUMAN;RAB3D_HUMAN;RAB8A_HUMAN;RAB8B_HUMAN	RAB13;RAB3A;RAB3B;RAB3C;RAB3D;RAB8A;RAB8B	Ras-related protein Rab-3D	Color2 [A=255, R=169, G=169, B=169]	1	4		19.5703	19.9427	19.8719	19.7305	20.0491	20.1678	20.1137	20.2238	19.8671	19.879	19.7586	19.4688
O95716;P20336;P61006;P61026;P61106;Q92930;Q96DA2;Q96E17	O95716;P20336;P61006;P61026;P61106;Q92930;Q96DA2;Q96E17	RAB10_HUMAN;RAB14_HUMAN;RAB3A_HUMAN;RAB3C_HUMAN;RAB3D_HUMAN;RAB8A_HUMAN;RAB8B_HUMAN;RB39B_HUMAN	RAB10;RAB14;RAB39B;RAB3A;RAB3C;RAB3D;RAB8A;RAB8B	Ras-related protein Rab-3D	Color2 [A=255, R=169, G=169, B=169]	1	4		18.125	18.5419	18.025	17.7239	17.4131	17.7894	17.952	18.0112	17.9616	17.7387	17.7358	17.6479
O95716;P20337;Q96E17	O95716;P20337;Q96E17	RAB3B_HUMAN;RAB3C_HUMAN;RAB3D_HUMAN	RAB3B;RAB3C;RAB3D	Ras-related protein Rab-3D	Color2 [A=255, R=169, G=169, B=169]	1	4		13.3707	14.8718	14.5058	14.2439	15.436	15.6688	15.0442	15.5416	15.1503	14.7641	14.9064	13.6719
O95716;P61224;P62834	O95716;P61224;P62834;A6NIZ1	RAB3D_HUMAN;RAP1A_HUMAN;RAP1B_HUMAN	RAB3D;RAP1A;RAP1B	Ras-related protein Rab-3D	Color2 [A=255, R=169, G=169, B=169]	1	4		18.8635	18.9764	18.8113	19.4639	19.7485	19.4619	19.4773	19.725	19.1961	19.3415	19.5302	19.2673
O95718	O95718	ERR2_HUMAN	ESRRB	Steroid hormone receptor ERR2	Color2 [A=255, R=169, G=169, B=169]	1	4		13.473	12.4024	11.4175	15.1291	13.8124	14.3599	15.2453	14.9443	11.4513	14.1565	13.874	12.7079
O95718;P11474	O95718;P11474	ERR1_HUMAN;ERR2_HUMAN	ESRRA;ESRRB	Steroid hormone receptor ERR2	Color2 [A=255, R=169, G=169, B=169]	1	4		14.0361	15.3172	14.9985	15.0419	16.2563	17.3027	17.1481	16.6373	16.3351	17.565	17.3382	17.2225
O95718;P62508	O95718;P62508	ERR2_HUMAN;ERR3_HUMAN	ESRRB;ESRRG	Steroid hormone receptor ERR2	Color2 [A=255, R=169, G=169, B=169]	1	4		13.7891	13.4922	14.3002	13.4483	13.9225	15.1967	14.52	14.7525	14.7454	15.3649	15.1238	15.4143
O95747	O95747	OXSR1_HUMAN	OXSR1	Serine/threonine-protein kinase OSR1	Color2 [A=255, R=169, G=169, B=169]	1	4		13.6635	13.8446	14.3255	14.2245	13.7041	14.5233	14.6255	14.515	14.292	14.636	15.0466	14.9023
O95747;Q9UEW8	O95747;Q9UEW8	OXSR1_HUMAN;STK39_HUMAN	OXSR1;STK39	Serine/threonine-protein kinase OSR1	Color2 [A=255, R=169, G=169, B=169]	1	4		10.7636	13.8243	11.4768	14.6149	14.133	13.2951	13.3862	13.5539	12.1806	14.3219	14.0961	13.8967
O95754	O95754	SEM4F_HUMAN	SEMA4F	Semaphorin-4F	Color2 [A=255, R=169, G=169, B=169]	1	4		10.1858	10.5151	13.1699	12.4375	12.8008	12.6172	13.7023	12.2396	12.7736	13.3892	12.0522	12.9842
O95755	O95755	RAB36_HUMAN	RAB36	Ras-related protein Rab-36	Color2 [A=255, R=169, G=169, B=169]	1	4		14.4002	14.6513	14.6846	14.2668	13.4927	13.8641	13.5635	14.3988	14.9738	14.4785	14.7676	14.7921
O95757	O95757	HS74L_HUMAN	HSPA4L	Heat shock 70 kDa protein 4L	Color2 [A=255, R=169, G=169, B=169]	1	4		15.5708	16.3822	16.3256	16.2135	16.221	16.6001	16.4655	16.7453	15.9031	16.7229	17.1107	17.514
O95757;P34932;Q92598	P34932;Q92598;O95757	HS105_HUMAN;HS74L_HUMAN;HSP74_HUMAN	HSPA4;HSPA4L;HSPH1	Heat shock 70 kDa protein 4L	Color2 [A=255, R=169, G=169, B=169]	1	4		11.4386	15.4309	14.3223	15.6183	15.0417	15.2515	16.1227	16.0719	14.6921	16.3954	15.3391	16.8971
O95757;Q92598	Q92598;O95757	HS105_HUMAN;HS74L_HUMAN	HSPA4L;HSPH1	Heat shock 70 kDa protein 4L	Color2 [A=255, R=169, G=169, B=169]	1	4		14.9733	15.0901	15.6036	15.0622	15.8129	15.7563	15.736	15.8466	15.5347	16.1718	16.2604	16.7683
O95758	O95758	PTBP3_HUMAN	PTBP3	Polypyrimidine tract-binding protein 3	Color2 [A=255, R=169, G=169, B=169]	1	4		17.7646	17.9247	17.5542	17.7495	17.0093	16.9634	17.1938	17.2941	17.0602	17.531	17.3436	17.3872
O95758;P26599	O95758;P26599	PTBP1_HUMAN;PTBP3_HUMAN	PTBP1;PTBP3	Polypyrimidine tract-binding protein 3	Color2 [A=255, R=169, G=169, B=169]	1	4		20.2995	20.1648	20.1264	20.0473	19.654	19.2933	19.7054	19.1475	19.8939	19.9083	19.9741	19.3754
O95772	O95772	STR3N_HUMAN	STARD3NL	STARD3 N-terminal-like protein	Color2 [A=255, R=169, G=169, B=169]	1	4		16.1479	15.9529	15.0187	16.0483	16.2854	16.7406	16.4824	17.1304	16.2453	16.3687	15.1633	14.5385
O95782	O95782	AP2A1_HUMAN	AP2A1	AP-2 complex subunit alpha-1	Color2 [A=255, R=169, G=169, B=169]	1	4		17.3931	17.5455	17.6346	17.6512	17.8729	18.1777	18.0908	17.9316	17.6439	18.6984	18.6573	18.4779
O95785	O95785	WIZ_HUMAN	WIZ	Protein Wiz	Color2 [A=255, R=169, G=169, B=169]	1	4		17.0912	18.957	19.1445	19.1631	17.4903	19.6577	19.2379	19.0095	17.8011	19.36	19.294	18.8961
O95789	O95789	ZMYM6_HUMAN	ZMYM6	Zinc finger MYM-type protein 6	Color2 [A=255, R=169, G=169, B=169]	1	4		13.8955	15.3242	15.2852	15.1857	14.3957	16.4971	16.1397	15.8236	13.7756	16.2289	16.3024	15.9902
O95793	O95793	STAU1_HUMAN	STAU1	Double-stranded RNA-binding protein Staufen homolog 1	Color2 [A=255, R=169, G=169, B=169]	1	4		17.1345	17.4944	17.5204	17.5098	17.2718	17.263	17.5602	17.3623	17.2868	17.9623	17.8537	17.9882
O95793;Q9NUL3	O95793;Q9NUL3	STAU1_HUMAN;STAU2_HUMAN	STAU1;STAU2	Double-stranded RNA-binding protein Staufen homolog 1	Color2 [A=255, R=169, G=169, B=169]	1	4		15.3027	15.7584	15.506	15.8758	15.3118	15.7741	16.2838	15.879	15.4057	15.8033	15.4382	15.5937
O95801	O95801	TTC4_HUMAN	TTC4	Tetratricopeptide repeat protein 4	Color2 [A=255, R=169, G=169, B=169]	1	4		13.9515	13.8533	14.352	13.6398	14.9344	14.4903	13.9992	15.1366	14.297	14.9185	14.7584	15.1954
O95807	O95807	TM50A_HUMAN	TMEM50A	Transmembrane protein 50A	Color2 [A=255, R=169, G=169, B=169]	1	4		10.1362	12.264	12.0215	11.5486	10.4026	12.7666	12.1265	12.353	12.4071	12.6162	12.3992	12.235
O95816	O95816	BAG2_HUMAN	BAG2	BAG family molecular chaperone regulator 2	Color2 [A=255, R=169, G=169, B=169]	1	4		18.507	18.2654	18.8337	18.7742	19.7157	20.2275	19.3886	19.4618	19.8693	20.167	20.1944	20.262
O95817	O95817	BAG3_HUMAN	BAG3	BAG family molecular chaperone regulator 3	Color2 [A=255, R=169, G=169, B=169]	1	4		15.9955	16.0073	16.2408	16.1045	16.2434	16.7189	16.3479	16.1579	15.5254	16.4481	16.8019	16.8259
O95819	O95819	M4K4_HUMAN	MAP4K4	Mitogen-activated protein kinase kinase kinase kinase 4	Color2 [A=255, R=169, G=169, B=169]	1	4		16.7831	17.0127	17.2952	16.6433	17.1963	17.517	17.3088	17.6475	17.2067	17.9054	17.9412	17.871
O95819;Q8N4C8	O95819;Q8N4C8;Q9UKE5	M4K4_HUMAN;MINK1_HUMAN	MAP4K4;MINK1	Mitogen-activated protein kinase kinase kinase kinase 4	Color2 [A=255, R=169, G=169, B=169]	1	4		15.9955	16.5385	16.0479	16.3636	16.2712	16.517	16.831	16.6867	16.0874	17.0078	16.8243	17.0905
O95822	O95822	DCMC_HUMAN	MLYCD	Malonyl-CoA decarboxylase, mitochondrial	Color2 [A=255, R=169, G=169, B=169]	1	4		17.3017	17.1848	17.2087	17.6689	17.5157	17.2793	17.4304	17.5274	17.204	17.4951	17.261	17.3209
O95831	O95831	AIFM1_HUMAN	AIFM1	Apoptosis-inducing factor 1, mitochondrial	Color2 [A=255, R=169, G=169, B=169]	1	4		21.5762	21.4933	21.4209	21.5376	21.6259	21.3366	21.4515	21.3735	21.1311	21.0854	21.0958	20.9162
O95834	O95834	EMAL2_HUMAN	EML2	Echinoderm microtubule-associated protein-like 2	Color2 [A=255, R=169, G=169, B=169]	1	4		13.8607	13.8485	13.9704	13.8175	13.3056	14.3499	14.0934	14.3167	13.3602	13.7044	13.6055	14.0541
O95835	O95835	LATS1_HUMAN	LATS1	Serine/threonine-protein kinase LATS1	Color2 [A=255, R=169, G=169, B=169]	1	4		14.6474	14.3629	14.3359	14.0384	14.0598	14.7862	14.9449	14.4855	14.9193	14.5969	14.1054	14.8511
O95837	O95837	GNA14_HUMAN	GNA14	Guanine nucleotide-binding protein subunit alpha-14	Color2 [A=255, R=169, G=169, B=169]	1	4		14.1172	10.6398	12.0513	14.7273	14.21	12.7934	13.9655	13.5358	14.1687	11.1974	12.5281	12.0734
O95837;P19086;P29992;P50148;Q03113;Q14344	O95837;P19086;P29992;P50148;Q03113;Q14344	GNA11_HUMAN;GNA12_HUMAN;GNA13_HUMAN;GNA14_HUMAN;GNAQ_HUMAN;GNAZ_HUMAN	GNA11;GNA12;GNA13;GNA14;GNAQ;GNAZ	Guanine nucleotide-binding protein subunit alpha-14	Color2 [A=255, R=169, G=169, B=169]	1	4		17.3386	16.9485	16.7036	17.5425	17.1721	17.7344	17.1756	16.8057	16.672	16.8706	17.0548	16.3509
O95837;P29992	O95837;P29992	GNA11_HUMAN;GNA14_HUMAN	GNA11;GNA14	Guanine nucleotide-binding protein subunit alpha-14	Color2 [A=255, R=169, G=169, B=169]	1	4		13.7828	14.3073	13.8125	14.6812	13.777	13.884	13.7726	13.7223	13.7845	14.9923	15.1351	15.1909
O95837;P29992;P50148	O95837;P29992;P50148	GNA11_HUMAN;GNA14_HUMAN;GNAQ_HUMAN	GNA11;GNA14;GNAQ	Guanine nucleotide-binding protein subunit alpha-14	Color2 [A=255, R=169, G=169, B=169]	1	4		17.6587	17.9154	17.5841	18.0425	17.9595	17.8926	18.0721	18.203	17.4953	17.974	18.1266	17.727
O95857	O95857	TSN13_HUMAN	TSPAN13	Tetraspanin-13	Color2 [A=255, R=169, G=169, B=169]	1	4		14.2295	15.0337	15.0732	14.6548	14.3191	13.0922	14.1394	13.7624	14.1245	14.4727	13.0521	14.5998
O95857;Q12999	Q12999;O95857	TSN13_HUMAN;TSN31_HUMAN	TSPAN13;TSPAN31	Tetraspanin-13	Color2 [A=255, R=169, G=169, B=169]	1	4		15.0205	16.3273	16.0995	16.1365	15.382	15.3134	15.3406	15.9707	15.2685	15.0438	14.8801	15.3738
O95858	O95858	TSN15_HUMAN	TSPAN15	Tetraspanin-15	Color2 [A=255, R=169, G=169, B=169]	1	4		9.98641	12.4464	13.2468	12.2985	12.3531	12.4564	12.9875	13.0796	13.3092	13.1406	13.7328	13.8856
O95861	O95861	BPNT1_HUMAN	BPNT1	3'(2'),5'-bisphosphate nucleotidase 1	Color2 [A=255, R=169, G=169, B=169]	1	4		16.3795	15.9829	16.3781	16.5519	16.3441	16.2587	16.5927	16.3398	16.4879	16.4229	16.5072	16.4796
O95864	O95864	FADS2_HUMAN	FADS2	Acyl-CoA 6-desaturase	Color2 [A=255, R=169, G=169, B=169]	1	4		19.4543	19.5234	19.4079	19.4251	19.4944	19.3716	19.5813	19.5856	19.6982	19.6394	19.5515	19.3283
O95865	O95865	DDAH2_HUMAN	DDAH2	N(G),N(G)-dimethylarginine dimethylaminohydrolase 2	Color2 [A=255, R=169, G=169, B=169]	1	4		12.853	13.8122	12.8117	14.9846	10.8453	12.7218	11.9961	13.3095	13.3993	13.3327	13.2856	13.0739
O95867	O95867	LY66C_HUMAN	LY6G6C	Lymphocyte antigen 6 complex locus protein G6c	Color2 [A=255, R=169, G=169, B=169]	1	4		14.2981	13.7242	9.79463	16.4035	13.4885	10.9244	11.2263	10.4123	11.875	12.0498	12.1082	12.6823
O95870	O95870	ABHGA_HUMAN	ABHD16A	Phosphatidylserine lipase ABHD16A	Color2 [A=255, R=169, G=169, B=169]	1	4		18.5526	18.6823	18.4658	18.5333	18.7566	18.8095	18.8594	18.8825	18.9553	18.6911	18.6847	18.428
O95872	O95872	GPAN1_HUMAN	GPANK1	G patch domain and ankyrin repeat-containing protein 1	Color2 [A=255, R=169, G=169, B=169]	1	4		12.8918	11.5731	13.1934	13.6775	13.4063	13.411	12.4297	13.2491	12.7718	13.156	12.9225	14.4034
O95881	O95881	TXD12_HUMAN	TXNDC12	Thioredoxin domain-containing protein 12	Color2 [A=255, R=169, G=169, B=169]	1	4		17.3547	17.4299	17.9022	18.0997	19.6687	19.8391	19.896	19.3109	18.9624	21.3272	21.3601	21.4458
O95886	O95886	DLGP3_HUMAN	DLGAP3	Disks large-associated protein 3	Color2 [A=255, R=169, G=169, B=169]	1	4		10.3327	11.2442	11.9759	13.1212	14.5151	14.29	14.0282	14.1076	10.0797	14.2499	13.9029	13.6767
O95897	O95897	NOE2_HUMAN	OLFM2	Noelin-2	Color2 [A=255, R=169, G=169, B=169]	1	4		10.7715	11.6301	11.1547	9.2111	9.95819	11.7695	12.7818	12.7679	12.7232	13.7987	14.1863	13.0423
O95900	O95900	TRUB2_HUMAN	TRUB2	Pseudouridylate synthase TRUB2, mitochondrial	Color2 [A=255, R=169, G=169, B=169]	1	4		19.8642	19.2848	19.4017	19.4759	19.4101	19.2763	19.35	19.277	19.284	18.7536	18.635	18.493
O95905	O95905	ECD_HUMAN	ECD	Protein ecdysoneless homolog	Color2 [A=255, R=169, G=169, B=169]	1	4		13.0613	13.7491	13.3186	13.9306	14.2298	14.3951	14.4658	14.6226	13.8759	14.253	14.6659	14.3634
O95922	O95922	TTLL1_HUMAN	TTLL1	Polyglutamylase complex subunit TTLL1	Color2 [A=255, R=169, G=169, B=169]	1	4		12.6261	13.0372	11.17	12.3968	12.3803	10.0086	12.8068	12.9249	14.2181	14.057	13.7778	14.8615
O95926	O95926	SYF2_HUMAN	SYF2	Pre-mRNA-splicing factor SYF2	Color2 [A=255, R=169, G=169, B=169]	1	4		14.9432	13.5233	14.5383	14.3598	14.3923	14.8189	14.5678	13.9511	15.3311	15.4214	14.9851	15.6065
O95948	O95948	ONEC2_HUMAN	ONECUT2	One cut domain family member 2	Color2 [A=255, R=169, G=169, B=169]	1	4		10.6236	12.6728	13.2909	13.1259	13.0596	13.2612	12.9239	12.6929	13.3227	13.0694	13.6081	14.1321
O95948;Q9UBC0	O95948;Q9UBC0;O60422	HNF6_HUMAN;ONEC2_HUMAN	ONECUT1;ONECUT2	One cut domain family member 2	Color2 [A=255, R=169, G=169, B=169]	1	4		11.6047	13.7455	14.3785	14.1274	13.7306	13.1457	12.3964	13.7055	13.2685	14.0031	13.5128	14.2055
O95969	O95969	SG1D2_HUMAN	SCGB1D2	Secretoglobin family 1D member 2	Color2 [A=255, R=169, G=169, B=169]	1	4		10.8942	14.7553	13.208	14.7369	13.4354	12.6209	11.2687	11.4222	12.9651	12.7176	8.82581	11.6185
O95983	O95983	MBD3_HUMAN	MBD3	Methyl-CpG-binding domain protein 3	Color2 [A=255, R=169, G=169, B=169]	1	4		16.6874	17.2005	17.4776	17.5168	17.1233	18.0776	17.7399	17.4851	17.1481	17.9546	17.9254	17.6764
O95983;Q9UBB5	O95983;Q9UBB5	MBD2_HUMAN;MBD3_HUMAN	MBD2;MBD3	Methyl-CpG-binding domain protein 3	Color2 [A=255, R=169, G=169, B=169]	1	4		12.8274	14.3619	15.5403	13.635	13.8692	15.7948	14.6789	12.8637	11.8648	13.8508	14.3492	14.2658
O95985	O95985	TOP3B_HUMAN	TOP3B	DNA topoisomerase 3-beta-1	Color2 [A=255, R=169, G=169, B=169]	1	4		13.4118	12.5497	13.7439	13.4042	13.1681	13.0961	12.9438	13.1598	13.4885	13.2961	13.3554	13.1424
O95985;Q13472	O95985;Q13472	TOP3A_HUMAN;TOP3B_HUMAN	TOP3A;TOP3B	DNA topoisomerase 3-beta-1	Color2 [A=255, R=169, G=169, B=169]	1	4		17.177	16.8311	16.7915	16.9217	16.4838	15.7265	16.204	16.1499	16.4807	16.3487	16.1309	15.833
O95995	O95995	DRC4_HUMAN	GAS8	Dynein regulatory complex subunit 4	Color2 [A=255, R=169, G=169, B=169]	1	4		10.719	10.7501	13.2148	11.3515	10.2039	13.2339	11.4416	12.3929	13.0299	12.5375	13.5642	12.6017
O95996	O95996	APCL_HUMAN	APC2	Adenomatous polyposis coli protein 2	Color2 [A=255, R=169, G=169, B=169]	1	4		18.8525	19.1154	18.6601	19.2312	19.1421	19.9321	19.7855	19.4912	18.9818	20.2158	20.0316	19.7282
O96000	O96000	NDUBA_HUMAN	NDUFB10	NADH dehydrogenase [ubiquinone] 1 beta subcomplex subunit 10	Color2 [A=255, R=169, G=169, B=169]	1	4		19.888	19.8614	19.9015	20.0155	19.9664	19.9682	20.0507	20.2473	20.1208	20.09	19.843	19.8606
O96005	O96005	CLPT1_HUMAN	CLPTM1	Putative lipid scramblase CLPTM1	Color2 [A=255, R=169, G=169, B=169]	1	4		17.3728	17.7603	17.3585	17.3738	17.3966	17.5472	17.6914	17.7207	17.37	17.316	17.2323	17.0829
O96006	O96006	ZBED1_HUMAN	ZBED1	E3 SUMO-protein ligase ZBED1	Color2 [A=255, R=169, G=169, B=169]	1	4		12.2855	12.3575	12.4874	12.163	12.4686	13.5043	12.375	13.1337	13.5007	13.297	12.4492	13.4398
O96008	O96008	TOM40_HUMAN	TOMM40	Mitochondrial import receptor subunit TOM40 homolog	Color2 [A=255, R=169, G=169, B=169]	1	4		21.4856	21.6151	21.3765	21.4166	21.2598	21.0811	21.3563	21.5846	21.2144	21.1305	21.1027	20.8024
O96011	O96011	PX11B_HUMAN	PEX11B	Peroxisomal membrane protein 11B	Color2 [A=255, R=169, G=169, B=169]	1	4		17.9984	18.2046	18.0889	18.1023	18.1214	18.1141	18.1037	18.2439	18.0354	17.9064	17.9713	17.6577
O96013	O96013	PAK4_HUMAN	PAK4	Serine/threonine-protein kinase PAK 4	Color2 [A=255, R=169, G=169, B=169]	1	4		13.9573	12.6785	14.4912	13.0955	13.302	13.3685	13.3252	13.0851	14.2227	14.1818	12.9149	13.5831
O96017	O96017	CHK2_HUMAN	CHEK2	Serine/threonine-protein kinase Chk2	Color2 [A=255, R=169, G=169, B=169]	1	4		14.5924	13.0117	13.0772	13.1071	13.2036	13.3333	13.623	13.5164	13.8984	13.7055	14.0006	13.9002
O96018	O96018	APBA3_HUMAN	APBA3	Amyloid-beta A4 precursor protein-binding family A member 3	Color2 [A=255, R=169, G=169, B=169]	1	4		12.6971	10.8856	13.3191	12.276	12.7283	13.8665	11.3539	13.8889	13.0977	12.1537	13.2715	13.6085
O96019	O96019	ACL6A_HUMAN	ACTL6A	Actin-like protein 6A	Color2 [A=255, R=169, G=169, B=169]	1	4		17.1266	17.3681	17.2617	17.1557	17.5627	17.5331	17.2252	17.3715	17.4283	17.5113	17.4161	17.118
O96028	O96028	NSD2_HUMAN	NSD2	Histone-lysine N-methyltransferase NSD2	Color2 [A=255, R=169, G=169, B=169]	1	4		16.5482	17.3255	17.3437	17.4475	16.9482	17.673	17.5672	17.5003	16.7514	17.6486	17.561	17.521
P00156	P00156	CYB_HUMAN	MT-CYB	Cytochrome b	Color2 [A=255, R=169, G=169, B=169]	1	4		12.2162	13.5485	13.1895	13.3593	12.7425	11.7579	12.1764	13.9196	12.711	12.3519	12.2832	11.7441
P00167	P00167	CYB5_HUMAN	CYB5A	Cytochrome b5	Color2 [A=255, R=169, G=169, B=169]	1	4		15.0908	15.4978	15.3047	14.4218	15.3171	15.7238	16.0332	16.3802	15.6067	15.7351	15.9742	16.2029
P00338	P00338	LDHA_HUMAN	LDHA	L-lactate dehydrogenase A chain	Color2 [A=255, R=169, G=169, B=169]	1	4		16.9787	16.6647	17.0402	17.2082	17.4378	17.3329	17.6367	17.1748	17.0307	17.8329	17.9896	18.2418
P00338;P07195	P00338;P07195;P07864;Q6ZMR3	LDHA_HUMAN;LDHB_HUMAN	LDHA;LDHB	L-lactate dehydrogenase A chain	Color2 [A=255, R=169, G=169, B=169]	1	4		13.6202	12.6314	12.6902	13.1675	13.9353	13.4001	13.4232	13.9767	12.685	14.1171	13.9783	13.5659
P00352	P00352	AL1A1_HUMAN	ALDH1A1	Aldehyde dehydrogenase 1A1	Color2 [A=255, R=169, G=169, B=169]	1	4		16.8676	16.6662	15.8571	16.0556	16.7572	16.3819	16.7588	16.4921	16.7984	16.1561	16.1405	14.9209
P00352;P05091	P00352;P05091	AL1A1_HUMAN;ALDH2_HUMAN	ALDH1A1;ALDH2	Aldehyde dehydrogenase 1A1	Color2 [A=255, R=169, G=169, B=169]	1	4		21.2344	21.3623	20.9891	21.1672	21.0867	21.3475	21.8704	21.7622	21.8225	20.6253	20.9385	20.9835
P00352;P05091;P30837	O94788;P00352;P05091;P30837;P47895	AL1A1_HUMAN;AL1B1_HUMAN;ALDH2_HUMAN	ALDH1A1;ALDH1B1;ALDH2	Aldehyde dehydrogenase 1A1	Color2 [A=255, R=169, G=169, B=169]	1	4		23.5227	23.1311	23.1151	23.1158	23.1199	22.9255	23.1254	23.1542	22.853	22.0767	22.1428	22.085
P00367	P00367;P49448	DHE3_HUMAN	GLUD1	Glutamate dehydrogenase 1, mitochondrial	Color2 [A=255, R=169, G=169, B=169]	1	4		21.8896	21.3912	21.499	21.5498	21.4856	21.2347	21.4439	21.3842	21.2418	20.7614	20.5418	20.5554
P00374	P00374	DYR_HUMAN	DHFR	Dihydrofolate reductase	Color2 [A=255, R=169, G=169, B=169]	1	4		14.9675	14.4141	15.1793	15.0169	15.1527	15.4727	15.571	15.4811	14.3438	15.5173	15.5638	15.7351
P00387	P00387	NB5R3_HUMAN	CYB5R3	NADH-cytochrome b5 reductase 3	Color2 [A=255, R=169, G=169, B=169]	1	4		19.8057	20.0307	19.655	19.9308	19.9544	19.944	20.0202	20.1324	19.8369	19.9126	19.8118	19.3821
P00390	P00390	GSHR_HUMAN	GSR	Glutathione reductase, mitochondrial	Color2 [A=255, R=169, G=169, B=169]	1	4		18.4457	18.3222	18.7274	18.4076	18.7786	18.9025	18.3438	18.5602	19.0712	19.2033	19.1206	19.3117
P00403	P00403	COX2_HUMAN	MT-CO2	Cytochrome c oxidase subunit 2	Color2 [A=255, R=169, G=169, B=169]	1	4		22.9425	22.8634	23.0103	22.7555	22.7491	22.847	23.1449	23.0172	22.792	22.4093	22.47	22.1012
P00414	P00414	COX3_HUMAN	MT-CO3	Cytochrome c oxidase subunit 3	Color2 [A=255, R=169, G=169, B=169]	1	4		17.7551	17.9322	17.7655	18.0381	17.9718	17.9718	17.9117	17.895	17.9391	17.5138	17.6792	17.2471
P00439	P00439	PH4H_HUMAN	PAH	Phenylalanine-4-hydroxylase	Color2 [A=255, R=169, G=169, B=169]	1	4		15.0031	13.2846	15.2345	14.3989	15.2604	15.4505	14.7352	14.4264	14.9822	15.7188	15.6547	16.0729
P00441	P00441	SODC_HUMAN	SOD1	Superoxide dismutase [Cu-Zn]	Color2 [A=255, R=169, G=169, B=169]	1	4		12.0412	13.2873	12.9668	12.0477	14.4071	10.9816	12.8639	11.7667	10.1813	13.3513	13.3685	12.2626
P00488	P00488	F13A_HUMAN	F13A1	Coagulation factor XIII A chain	Color2 [A=255, R=169, G=169, B=169]	1	4		14.2877	14.9502	14.3839	14.6996	15.2481	15.5986	15.5026	16.0619	15.4113	15.2972	16.0292	16.5068
P00491	P00491	PNPH_HUMAN	PNP	Purine nucleoside phosphorylase	Color2 [A=255, R=169, G=169, B=169]	1	4		15.1716	15.4753	15.4204	17.4247	15.0121	14.3543	14.6906	14.3745	14.8845	13.7801	14.9044	14.7401
P00492	P00492	HPRT_HUMAN	HPRT1	Hypoxanthine-guanine phosphoribosyltransferase	Color2 [A=255, R=169, G=169, B=169]	1	4		13.695	13.9798	13.6663	14.679	14.3455	14.0747	13.8879	14.2524	14.0658	14.6392	14.6062	15.0657
P00505	P00505	AATM_HUMAN	GOT2	Aspartate aminotransferase, mitochondrial	Color2 [A=255, R=169, G=169, B=169]	1	4		18.8492	18.7267	18.6244	18.7971	18.7093	18.3084	18.6499	18.6676	18.3169	18.3312	18.3882	18.2061
P00533	P00533	EGFR_HUMAN	EGFR	Epidermal growth factor receptor	Color2 [A=255, R=169, G=169, B=169]	1	4		16.3665	16.4454	16.8204	16.6625	17.3897	17.6344	17.352	17.3496	17.3689	17.8648	17.8663	17.7764
P00533;P04626;Q15303	P00533;P04626;Q15303	EGFR_HUMAN;ERBB2_HUMAN;ERBB4_HUMAN	EGFR;ERBB2;ERBB4	Epidermal growth factor receptor	Color2 [A=255, R=169, G=169, B=169]	1	4		16.204	16.3799	16.2665	16.3525	17.0316	16.9366	17.1484	16.7649	16.9993	17.2456	17.1537	17.1431
P00558	P00558	PGK1_HUMAN	PGK1	Phosphoglycerate kinase 1	Color2 [A=255, R=169, G=169, B=169]	1	4		16.2199	16.3987	16.3025	16.5789	16.4529	15.9044	16.32	16.4039	16.5244	16.5205	16.8572	17.1551
P00568	P00568	KAD1_HUMAN	AK1	Adenylate kinase isoenzyme 1	Color2 [A=255, R=169, G=169, B=169]	1	4		14.6675	15.142	15.2313	15.4491	15.4952	15.9626	14.9323	15.3224	15.3084	16.4272	16.4868	16.7102
P00734	P00734	THRB_HUMAN	F2	Prothrombin	Color2 [A=255, R=169, G=169, B=169]	1	4		18.0181	18.1885	18.4378	18.3042	18.5015	18.7705	18.9495	19.0612	18.1662	18.6215	19.1092	19.5882
P00747	P00747	PLMN_HUMAN	PLG	Plasminogen	Color2 [A=255, R=169, G=169, B=169]	1	4		12.7532	13.2888	11.8057	12.1613	13.7671	13.6356	13.7515	14.379	12.9366	14.2999	14.6738	14.7331
P00748	P00748	FA12_HUMAN	F12	Coagulation factor XII	Color2 [A=255, R=169, G=169, B=169]	1	4		15.3114	14.7178	15.1058	14.5666	15.2676	15.0145	15.0437	15.0566	15.264	14.5337	14.7509	14.8751
P00846	P00846	ATP6_HUMAN	MT-ATP6	ATP synthase subunit a	Color2 [A=255, R=169, G=169, B=169]	1	4		15.7266	17.0055	16.3499	17.3069	16.6231	16.9742	17.583	17.9019	16.9873	17.0122	16.8081	16.5409
P00966	P00966	ASSY_HUMAN	ASS1	Argininosuccinate synthase	Color2 [A=255, R=169, G=169, B=169]	1	4		15.5469	15.6877	15.9438	16.9022	16.4037	16.4749	16.3448	16.6439	15.7841	16.8323	17.0486	17.3485
P01008	P01008	ANT3_HUMAN	SERPINC1	Antithrombin-III	Color2 [A=255, R=169, G=169, B=169]	1	4		13.5358	13.683	14.1466	12.5234	14.0279	12.8174	13.7821	13.9617	12.9705	12.5708	14.099	14.2517
P01024	P01024	CO3_HUMAN	C3	Complement C3	Color2 [A=255, R=169, G=169, B=169]	1	4		13.7005	14.4252	15.2007	12.7129	14.1664	13.3481	13.9308	13.9294	13.9697	12.6706	12.6053	12.8355
P01037	P01037	CYTN_HUMAN	CST1	Cystatin-SN	Color2 [A=255, R=169, G=169, B=169]	1	4		10.1598	11.5704	12.4598	15.1571	11.1053	10.5081	9.62917	11.2034	9.62223	12.5204	9.69244	12.2896
P01040	P01040	CYTA_HUMAN	CSTA	Cystatin-A	Color2 [A=255, R=169, G=169, B=169]	1	4		15.7421	16.2663	15.3112	16.4021	15.3653	12.0582	13.8032	14.7929	15.0906	12.8559	15.1926	14.7544
P01042	P01042	KNG1_HUMAN	KNG1	Kininogen-1	Color2 [A=255, R=169, G=169, B=169]	1	4		12.3063	12.5403	11.0007	12.7943	8.83903	11.0953	11.6893	11.1637	11.3125	11.2953	11.1225	13.1253
P01106	P01106	MYC_HUMAN	MYC	Myc proto-oncogene protein	Color2 [A=255, R=169, G=169, B=169]	1	4		16.2317	17.9465	17.8706	17.739	16.7239	18.2555	18.0235	17.8142	15.8244	17.5762	17.6544	17.3282
P01106;P04198	P01106;P04198	MYCN_HUMAN;MYC_HUMAN	MYC;MYCN	Myc proto-oncogene protein	Color2 [A=255, R=169, G=169, B=169]	1	4		12.8761	15.0542	16.4278	16.4865	14.0258	15.945	16.303	15.7555	14.324	15.3844	16.2436	15.5336
P01111	P01111	RASN_HUMAN	NRAS	GTPase NRas	Color2 [A=255, R=169, G=169, B=169]	1	4		19.1637	18.815	19.1828	18.7595	18.5165	18.4504	18.7125	17.7364	18.6191	19.2573	19.0436	18.8303
P01111;P01112	P01111;P01112	RASH_HUMAN;RASN_HUMAN	HRAS;NRAS	GTPase NRas	Color2 [A=255, R=169, G=169, B=169]	1	4		18.4551	18.6515	18.2932	18.7074	18.5333	18.7988	18.5964	18.3927	18.5002	19.0269	18.7052	18.7204
P01111;P01112;P01116	P01111;P01112;P01116	RASH_HUMAN;RASK_HUMAN;RASN_HUMAN	HRAS;KRAS;NRAS	GTPase NRas	Color2 [A=255, R=169, G=169, B=169]	1	4		19.9654	20.439	20.2831	20.2983	20.1221	20.3131	20.2769	20.4598	20.1072	20.1812	20.5416	20.0778
P01111;P01116	P01111;P01116	RASK_HUMAN;RASN_HUMAN	KRAS;NRAS	GTPase NRas	Color2 [A=255, R=169, G=169, B=169]	1	4		19.974	20.2315	20.1472	20.2584	20.2025	20.398	20.4025	20.1633	20.0629	20.6131	20.4304	20.2344
P01112	P01112	RASH_HUMAN	HRAS	GTPase HRas	Color2 [A=255, R=169, G=169, B=169]	1	4		18.7588	19.5979	19.6979	19.5624	19.5835	19.8436	19.7558	19.5312	19.8142	19.9992	20.0619	19.9253
P01112;P01116	P01112;P01116	RASH_HUMAN;RASK_HUMAN	HRAS;KRAS	GTPase HRas	Color2 [A=255, R=169, G=169, B=169]	1	4		16.5701	17.5013	17.4575	16.3727	17.1965	17.2312	17.3518	17.4041	16.4245	16.4765	16.5788	15.7415
P01116	P01116	RASK_HUMAN	KRAS	GTPase KRas	Color2 [A=255, R=169, G=169, B=169]	1	4		17.0246	17.3857	17.2774	17.6222	17.8277	17.7178	17.5785	17.7759	17.7332	17.9874	18.045	17.5695
P01130	P01130	LDLR_HUMAN	LDLR	Low-density lipoprotein receptor	Color2 [A=255, R=169, G=169, B=169]	1	4		14.4241	14.5024	14.3975	14.3537	14.8919	14.8699	14.8549	14.6517	14.6708	15.2194	14.975	15.0754
P01137	P01137	TGFB1_HUMAN	TGFB1	Transforming growth factor beta-1 proprotein	Color2 [A=255, R=169, G=169, B=169]	1	4		16.5711	15.0127	12.5981	16.6317	16.8488	16.6854	16.1546	17.0549	17.0526	16.9209	17.1197	16.9381
P01308	P01308;F8WCM5	INS_HUMAN	INS	Insulin	Color2 [A=255, R=169, G=169, B=169]	1	4		19.0912	19.2069	18.7959	19.6617	19.6006	19.6641	20.0385	20.4078	19.5083	20.2399	20.6712	21.0437
P01591	P01591	IGJ_HUMAN	JCHAIN	Immunoglobulin J chain	Color2 [A=255, R=169, G=169, B=169]	1	4		14.0348	12.474	14.6377	15.6858	12.9174	12.5643	14.165	13.0274	14.5218	12.665	14.3258	13.2532
P01833	P01833	PIGR_HUMAN	PIGR	Polymeric immunoglobulin receptor	Color2 [A=255, R=169, G=169, B=169]	1	4		10.5323	13.2213	12.2993	14.762	13.3082	13.0059	13.4833	12.4707	13.5807	13.3868	13.4037	14.2786
P01834	P01834;P0DOX7	IGKC_HUMAN	IGKC	Immunoglobulin kappa constant	Color2 [A=255, R=169, G=169, B=169]	1	4		12.4279	14.7762	14.0338	16.9196	14.2756	10.6883	14.2087	13.059	13.1295	13.9697	14.7107	13.6491
P01857	P01857;P0DOX5	IGHG1_HUMAN	IGHG1	Immunoglobulin heavy constant gamma 1	Color2 [A=255, R=169, G=169, B=169]	1	4		9.67482	14.9808	14.855	17.7624	14.4441	13.4383	12.2074	11.5276	15.6792	14.7076	14.2457	14.4256
P01857;P01860	P01857;P01860;P01861;P0DOX5	IGHG1_HUMAN;IGHG3_HUMAN	IGHG1;IGHG3	Immunoglobulin heavy constant gamma 1	Color2 [A=255, R=169, G=169, B=169]	1	4		20.2693	20.751	20.881	21.1192	20.887	20.7749	20.7787	20.4387	20.6334	20.3768	20.5613	19.933
P01859	P01859	IGHG2_HUMAN	IGHG2	Immunoglobulin heavy constant gamma 2	Color2 [A=255, R=169, G=169, B=169]	1	4		12.1408	11.6422	12.0908	14.0316	12.026	11.6192	11.8216	9.321	12.1455	11.2786	11.685	11.1164
P01860	P01860	IGHG3_HUMAN	IGHG3	Immunoglobulin heavy constant gamma 3	Color2 [A=255, R=169, G=169, B=169]	1	4		13.3998	13.4433	12.9228	17.4274	15.0775	13.1397	13.8208	13.4572	12.8835	14.2733	14.6031	14.1981
P01876	P01876;P01877;P0DOX2	IGHA1_HUMAN	IGHA1	Immunoglobulin heavy constant alpha 1	Color2 [A=255, R=169, G=169, B=169]	1	4		13.769	15.421	14.7553	17.9844	15.4454	13.6593	14.1073	13.3979	14.7894	14.0051	15.1974	12.7907
P01889	P01889	HLAB_HUMAN	HLA-B	HLA class I histocompatibility antigen, B alpha chain	Color2 [A=255, R=169, G=169, B=169]	1	4		15.8535	16.2227	15.5902	16.6831	17.8001	17.8504	18.2845	17.535	17.9343	18.4803	18.2037	18.3897
P01889;P01893;P04439;P13747	P01889;P01893;P04439;P13747;P17693	HLAA_HUMAN;HLAB_HUMAN;HLAE_HUMAN;HLAH_HUMAN	HLA-A;HLA-B;HLA-E;HLA-H	HLA class I histocompatibility antigen, B alpha chain	Color2 [A=255, R=169, G=169, B=169]	1	4		15.6855	15.9381	14.1992	16.0549	17.7494	17.6828	17.664	17.6113	17.6961	18.2375	18.2523	18.0388
P01889;P04439	P01889;P04439	HLAA_HUMAN;HLAB_HUMAN	HLA-A;HLA-B	HLA class I histocompatibility antigen, B alpha chain	Color2 [A=255, R=169, G=169, B=169]	1	4		14.9433	15.8702	15.5559	15.3744	17.2256	17.4117	17.1609	17.5017	17.1862	17.2196	17.5977	17.0601
P01889;P10321	P01889;P10321	HLAB_HUMAN;HLAC_HUMAN	HLA-B;HLA-C	HLA class I histocompatibility antigen, B alpha chain	Color2 [A=255, R=169, G=169, B=169]	1	4		11.7775	12.2195	11.8598	10.5012	16.3109	16.0575	16.2511	15.8357	16.5423	16.2646	17.3812	17.0281
P01893	P01893	HLAH_HUMAN	HLA-H	Putative HLA class I histocompatibility antigen, alpha chain H	Color2 [A=255, R=169, G=169, B=169]	1	4		10.741	12.6433	10.3443	10.3893	15.4482	15.5181	14.999	15.4984	16.6183	16.3482	16.5993	16.1517
P01893;P04439	P01893;P04439	HLAA_HUMAN;HLAH_HUMAN	HLA-A;HLA-H	Putative HLA class I histocompatibility antigen, alpha chain H	Color2 [A=255, R=169, G=169, B=169]	1	4		12.2483	14.2084	13.2926	12.5137	15.1486	15.116	15.2645	14.5144	14.9207	15.7916	15.8607	15.5973
P01893;P04439;P10321	P01893;P04439;P10321;P30511	HLAA_HUMAN;HLAC_HUMAN;HLAH_HUMAN	HLA-A;HLA-C;HLA-H	Putative HLA class I histocompatibility antigen, alpha chain H	Color2 [A=255, R=169, G=169, B=169]	1	4		16.7328	17.3663	16.5152	16.583	18.8039	18.8714	18.8355	18.3221	18.6559	17.7373	19.092	18.7207
P02008;P69905	P02008;P69905	HBAZ_HUMAN;HBA_HUMAN	HBA2;HBZ	Hemoglobin subunit zeta	Color2 [A=255, R=169, G=169, B=169]	1	4		18.0779	19.6831	19.7772	19.3046	19.8237	19.7954	19.7143	20.3838	18.8553	19.4173	20.3397	20.774
P02511	P02511	CRYAB_HUMAN	CRYAB	Alpha-crystallin B chain	Color2 [A=255, R=169, G=169, B=169]	1	4		18.3399	18.6455	18.6583	18.6489	19.3462	19.2739	19.2293	19.4729	19.0125	19.1001	19.2802	19.3317
P02533	P02533	K1C14_HUMAN	KRT14	Keratin, type I cytoskeletal 14	Color2 [A=255, R=169, G=169, B=169]	1	4		19.3439	19.55	20.1585	21.8529	19.3263	18.838	19.3684	19.0545	19.7198	18.0937	19.1276	18.4821
P02533;P08727	P02533;P08727	K1C14_HUMAN;K1C19_HUMAN	KRT14;KRT19	Keratin, type I cytoskeletal 14	Color2 [A=255, R=169, G=169, B=169]	1	4		17.5754	18.5254	18.3667	20.673	17.9337	17.2943	18.0562	17.3753	17.7274	16.5312	16.8764	15.2448
P02533;P08727;P08779;P13645;P19012;P35527;Q04695;Q99456	P02533;P08727;P08779;P13645;P19012;P35527;Q04695;Q99456	K1C10_HUMAN;K1C12_HUMAN;K1C14_HUMAN;K1C15_HUMAN;K1C16_HUMAN;K1C17_HUMAN;K1C19_HUMAN;K1C9_HUMAN	KRT10;KRT12;KRT14;KRT15;KRT16;KRT17;KRT19;KRT9	Keratin, type I cytoskeletal 14	Color2 [A=255, R=169, G=169, B=169]	1	4		22.4697	22.762	22.7552	24.7208	22.6931	22.2545	21.8705	20.8397	22.3772	21.0896	22.8573	21.6689
P02533;P08727;P08779;P13645;P19012;Q04695;Q99456	P02533;P08727;P08779;P13645;P19012;Q04695;Q99456	K1C10_HUMAN;K1C12_HUMAN;K1C14_HUMAN;K1C15_HUMAN;K1C16_HUMAN;K1C17_HUMAN;K1C19_HUMAN	KRT10;KRT12;KRT14;KRT15;KRT16;KRT17;KRT19	Keratin, type I cytoskeletal 14	Color2 [A=255, R=169, G=169, B=169]	1	4		22.5544	22.7293	22.9398	22.8444	21.9268	21.5835	21.702	21.6595	22.2206	21.1676	21.7418	21.4506
P02533;P08727;P08779;P13646;P19012;Q04695	P02533;P08727;P08779;P13646;P19012;P35900;Q04695;Q8N1A0	K1C13_HUMAN;K1C14_HUMAN;K1C15_HUMAN;K1C16_HUMAN;K1C17_HUMAN;K1C19_HUMAN	KRT13;KRT14;KRT15;KRT16;KRT17;KRT19	Keratin, type I cytoskeletal 14	Color2 [A=255, R=169, G=169, B=169]	1	4		18.1042	18.1877	19.1372	19.0656	16.5564	17.6299	19.6985	16.251	15.6722	17.351	17.2087	18.0004
P02533;P08727;P08779;P19012;Q04695	P02533;P08727;P08779;P19012;Q04695	K1C14_HUMAN;K1C15_HUMAN;K1C16_HUMAN;K1C17_HUMAN;K1C19_HUMAN	KRT14;KRT15;KRT16;KRT17;KRT19	Keratin, type I cytoskeletal 14	Color2 [A=255, R=169, G=169, B=169]	1	4		23.205	22.661	23.2239	22.9789	22.1305	21.9573	23.0266	22.5663	22.8038	21.4204	21.4796	21.2619
P02533;P08779	P02533;P08779	K1C14_HUMAN;K1C16_HUMAN	KRT14;KRT16	Keratin, type I cytoskeletal 14	Color2 [A=255, R=169, G=169, B=169]	1	4		20.736	20.5943	21.0512	22.8668	20.1738	19.7919	20.8209	20.2453	20.7451	19.2674	19.5956	19.3722
P02533;P08779;P13645	P02533;P08779;P13645	K1C10_HUMAN;K1C14_HUMAN;K1C16_HUMAN	KRT10;KRT14;KRT16	Keratin, type I cytoskeletal 14	Color2 [A=255, R=169, G=169, B=169]	1	4		12.8108	15.0149	13.6229	14.5978	13.2415	13.4398	11.5516	13.0668	12.237	12.6713	12.9623	12.2043
P02533;P08779;P13645;Q7Z3Y7;Q7Z3Y8;Q7Z3Z0	P02533;P08779;P13645;Q7Z3Y7;Q7Z3Y8;Q7Z3Y9;Q7Z3Z0	K1C10_HUMAN;K1C14_HUMAN;K1C16_HUMAN;K1C25_HUMAN;K1C27_HUMAN;K1C28_HUMAN	KRT10;KRT14;KRT16;KRT25;KRT27;KRT28	Keratin, type I cytoskeletal 14	Color2 [A=255, R=169, G=169, B=169]	1	4		24.3081	24.9728	24.8694	25.8369	24.3292	23.9744	24.1901	20.4616	22.8548	22.0353	23.8811	23.787
P02533;P08779;P13646;P19012	P02533;P08779;P13646;P19012	K1C13_HUMAN;K1C14_HUMAN;K1C15_HUMAN;K1C16_HUMAN	KRT13;KRT14;KRT15;KRT16	Keratin, type I cytoskeletal 14	Color2 [A=255, R=169, G=169, B=169]	1	4		20.0259	20.6225	20.986	22.9798	20.1828	19.1251	20.6816	19.5916	19.8426	18.8026	19.0629	18.9073
P02533;P08779;P13646;P19012;Q04695	P02533;P08779;P13646;P19012;P35900;Q04695	K1C13_HUMAN;K1C14_HUMAN;K1C15_HUMAN;K1C16_HUMAN;K1C17_HUMAN	KRT13;KRT14;KRT15;KRT16;KRT17	Keratin, type I cytoskeletal 14	Color2 [A=255, R=169, G=169, B=169]	1	4		21.6297	21.1586	22.049	22.5372	20.7443	20.2584	22.1625	21.1441	21.5423	19.6825	20.8636	19.9605
P02533;P08779;Q04695	P02533;P08779;P35900;Q04695	K1C14_HUMAN;K1C16_HUMAN;K1C17_HUMAN	KRT14;KRT16;KRT17	Keratin, type I cytoskeletal 14	Color2 [A=255, R=169, G=169, B=169]	1	4		16.8434	17.7529	18.6713	19.6703	18.009	17.2713	16.962	16.1372	18.1842	14.502	16.7246	16.868
P02533;Q04695	P02533;Q04695	K1C14_HUMAN;K1C17_HUMAN	KRT14;KRT17	Keratin, type I cytoskeletal 14	Color2 [A=255, R=169, G=169, B=169]	1	4		20.4412	20.8132	21.0933	22.3697	20.3833	20.0709	20.3798	20.1506	20.7938	19.3701	20.002	19.5797
P02538	P02538	K2C6A_HUMAN	KRT6A	Keratin, type II cytoskeletal 6A	Color2 [A=255, R=169, G=169, B=169]	1	4		20.0564	19.5449	20.4705	21.9614	20.0473	18.8255	21.0902	19.3348	19.9202	18.6517	18.5276	19.1043
P02538;P04259	P02538;P04259	K2C6A_HUMAN;K2C6B_HUMAN	KRT6A;KRT6B	Keratin, type II cytoskeletal 6A	Color2 [A=255, R=169, G=169, B=169]	1	4		14.8037	14.4704	14.9207	17.187	15.0354	14.0595	15.5024	15.3412	15.1255	13.4102	14.3959	14.6129
P02538;P04259;P04264;P05787;P13647;P48668;Q5XKE5	P02538;P04259;P04264;P05787;P13647;P48668;Q5XKE5	K2C1_HUMAN;K2C5_HUMAN;K2C6A_HUMAN;K2C6B_HUMAN;K2C6C_HUMAN;K2C79_HUMAN;K2C8_HUMAN	KRT1;KRT5;KRT6A;KRT6B;KRT6C;KRT79;KRT8	Keratin, type II cytoskeletal 6A	Color2 [A=255, R=169, G=169, B=169]	1	4		17.5551	17.3182	17.7547	20.0095	17.5589	16.9755	17.1901	17.2061	17.8042	16.5003	17.343	16.8886
P02538;P04259;P05787;P48668	P02538;P04259;P05787;P48668	K2C6A_HUMAN;K2C6B_HUMAN;K2C6C_HUMAN;K2C8_HUMAN	KRT6A;KRT6B;KRT6C;KRT8	Keratin, type II cytoskeletal 6A	Color2 [A=255, R=169, G=169, B=169]	1	4		15.3989	14.1356	15.5517	16.8332	14.3411	13.9234	15.2942	15.3423	14.3256	11.4196	12.8723	10.5765
P02538;P04259;P12035;P48668	P02538;P04259;P12035;P48668	K2C3_HUMAN;K2C6A_HUMAN;K2C6B_HUMAN;K2C6C_HUMAN	KRT3;KRT6A;KRT6B;KRT6C	Keratin, type II cytoskeletal 6A	Color2 [A=255, R=169, G=169, B=169]	1	4		20.2414	19.2381	20.5308	21.3108	19.2764	18.6531	20.7795	19.6252	19.7411	18.0856	18.5504	18.4629
P02538;P04259;P13647;P48668	P02538;P04259;P13647;P48668	K2C5_HUMAN;K2C6A_HUMAN;K2C6B_HUMAN;K2C6C_HUMAN	KRT5;KRT6A;KRT6B;KRT6C	Keratin, type II cytoskeletal 6A	Color2 [A=255, R=169, G=169, B=169]	1	4		23.1535	22.8308	23.3741	24.3375	22.8328	22.3166	23.1719	22.7059	23.1434	21.874	22.3564	21.8937
P02538;P04259;P13647;P48668;Q5XKE5	P02538;P04259;P13647;P48668;Q5XKE5	K2C5_HUMAN;K2C6A_HUMAN;K2C6B_HUMAN;K2C6C_HUMAN;K2C79_HUMAN	KRT5;KRT6A;KRT6B;KRT6C;KRT79	Keratin, type II cytoskeletal 6A	Color2 [A=255, R=169, G=169, B=169]	1	4		17.6776	18.1331	17.7854	19.3693	18.1104	17.3643	18.6676	17.803	17.0975	16.3387	17.5633	17.0784
P02538;P04259;P19013;P35908;P48668;Q01546	P02538;P04259;P19013;P35908;P48668;Q01546	K22E_HUMAN;K22O_HUMAN;K2C4_HUMAN;K2C6A_HUMAN;K2C6B_HUMAN;K2C6C_HUMAN	KRT2;KRT4;KRT6A;KRT6B;KRT6C;KRT76	Keratin, type II cytoskeletal 6A	Color2 [A=255, R=169, G=169, B=169]	1	4		22.6903	23.0809	22.9279	23.684	22.0948	21.8038	22.0196	22.3654	22.0455	21.0057	21.9854	21.2619
P02538;P04259;P48668	P02538;P04259;P48668	K2C6A_HUMAN;K2C6B_HUMAN;K2C6C_HUMAN	KRT6A;KRT6B;KRT6C	Keratin, type II cytoskeletal 6A	Color2 [A=255, R=169, G=169, B=169]	1	4		21.1751	20.5962	21.3599	22.7913	20.4395	19.494	21.4916	20.4356	20.7246	19.1429	19.5704	19.4792
P02538;P04259;P48668;Q14CN4	P02538;P04259;P48668;Q14CN4	K2C6A_HUMAN;K2C6B_HUMAN;K2C6C_HUMAN;K2C72_HUMAN	KRT6A;KRT6B;KRT6C;KRT72	Keratin, type II cytoskeletal 6A	Color2 [A=255, R=169, G=169, B=169]	1	4		15.3305	10.792	15.0856	16.2921	14.6727	10.549	15.0241	13.2966	15.2711	10.4027	12.3396	13.18
P02538;P04259;Q14CN4	P02538;P04259;P48668;Q14CN4	K2C6A_HUMAN;K2C6B_HUMAN;K2C72_HUMAN	KRT6A;KRT6B;KRT72	Keratin, type II cytoskeletal 6A	Color2 [A=255, R=169, G=169, B=169]	1	4		14.733	14.4357	16.0165	13.9616	10.3133	11.7911	15.1069	14.0685	11.0663	11.23	10.7489	10.6176
P02538;P13647;P48668	P02538;P13647;P48668	K2C5_HUMAN;K2C6A_HUMAN;K2C6C_HUMAN	KRT5;KRT6A;KRT6C	Keratin, type II cytoskeletal 6A	Color2 [A=255, R=169, G=169, B=169]	1	4		21.6241	21.0959	21.9428	22.4111	20.8358	20.2854	21.2563	20.9119	21.3126	19.813	20.311	19.897
P02538;P48668	P02538;P48668	K2C6A_HUMAN;K2C6C_HUMAN	KRT6A;KRT6C	Keratin, type II cytoskeletal 6A	Color2 [A=255, R=169, G=169, B=169]	1	4		18.3911	17.9979	18.7228	20.2241	17.4224	16.9355	18.6974	17.873	18.4618	16.4321	15.8145	17.0005
P02545	P02545	LMNA_HUMAN	LMNA	Prelamin-A/C	Color2 [A=255, R=169, G=169, B=169]	1	4		22.2807	22.1783	22.4116	22.3156	22.3469	22.3579	22.2823	22.2704	22.5364	22.3599	22.3539	22.2459
P02545;P20700;Q03252	P02545;P20700;Q03252	LMNA_HUMAN;LMNB1_HUMAN;LMNB2_HUMAN	LMNA;LMNB1;LMNB2	Prelamin-A/C	Color2 [A=255, R=169, G=169, B=169]	1	4		19.7246	19.2608	19.8285	19.2454	19.8413	19.0227	18.7636	19.7476	19.8648	19.3201	19.7873	19.5563
P02649	P02649	APOE_HUMAN	APOE	Apolipoprotein E	Color2 [A=255, R=169, G=169, B=169]	1	4		10.4893	10.332	10.1778	9.47613	13.8794	14.337	13.4981	10.6259	12.0846	14.1675	13.2888	15.209
P02656	P02656	APOC3_HUMAN	APOC3	Apolipoprotein C-III	Color2 [A=255, R=169, G=169, B=169]	1	4		14.6545	15.2233	15.7872	13.7463	14.3702	14.4558	14.744	14.8427	15.0279	13.8278	15.1288	14.8137
P02751	P02751	FINC_HUMAN	FN1	Fibronectin	Color2 [A=255, R=169, G=169, B=169]	1	4		9.75371	10.0577	12.0162	10.4338	10.1059	10.0874	10.6992	11.7848	10.7518	12.6265	11.4773	14.3287
P02765	P02765	FETUA_HUMAN	AHSG	Alpha-2-HS-glycoprotein	Color2 [A=255, R=169, G=169, B=169]	1	4		14.8808	15.2921	14.441	15.0341	16.6209	15.8004	15.8795	15.8776	14.2036	15.1486	16.9919	15.9373
P02768	P02768	ALBU_HUMAN	ALB	Albumin	Color2 [A=255, R=169, G=169, B=169]	1	4		24.6642	24.3988	24.9224	27.3305	24.3268	23.7514	24.1163	24.1417	24.4103	23.5061	24.0903	23.6748
P02786	P02786	TFR1_HUMAN	TFRC	Transferrin receptor protein 1	Color2 [A=255, R=169, G=169, B=169]	1	4		19.1396	19.4455	18.9489	19.1296	19.1947	18.9646	19.3074	19.1856	18.9371	19.0902	19.2454	18.9319
P02787	P02787	TRFE_HUMAN	TF	Serotransferrin	Color2 [A=255, R=169, G=169, B=169]	1	4		11.7912	13.043	13.1295	13.3852	12.6883	10.9254	12.4891	12.6047	11.5539	12.0483	12.8018	13.6924
P02788	P02788	TRFL_HUMAN	LTF	Lactotransferrin	Color2 [A=255, R=169, G=169, B=169]	1	4		14.5791	15.2423	14.281	17.2408	15.1633	14.0268	14.6817	13.7445	14.2961	13.7611	15.1612	14.1529
P02792	P02792	FRIL_HUMAN	FTL	Ferritin light chain	Color2 [A=255, R=169, G=169, B=169]	1	4		15.068	14.9101	14.814	15.0207	14.8746	14.7307	15.1591	15.1265	14.5627	14.6991	15.0118	14.3117
P02794	P02794	FRIH_HUMAN	FTH1	Ferritin heavy chain	Color2 [A=255, R=169, G=169, B=169]	1	4		15.3169	16.1728	16.1276	16.6033	16.7149	16.4342	16.623	16.6312	16.3348	16.2795	16.0245	16.4571
P02795;P13640;P80297	P02795;P04732;P13640;P80297;Q8N339	MT1G_HUMAN;MT1X_HUMAN;MT2_HUMAN	MT1G;MT1X;MT2A	Metallothionein-2	Color2 [A=255, R=169, G=169, B=169]	1	4		14.5003	14.4427	14.0607	14.2648	15.1618	15.0176	14.4592	14.613	15.297	15.0196	15.0632	15.4223
P02810	P02810	PRPC_HUMAN	PRH2	Salivary acidic proline-rich phosphoprotein 1/2	Color2 [A=255, R=169, G=169, B=169]	1	4		15.5253	15.3827	15.1867	18.1934	12.7865	14.0495	14.5588	15.0775	15.6826	14.4857	15.5039	15.5191
P03886	P03886	NU1M_HUMAN	MT-ND1	NADH-ubiquinone oxidoreductase chain 1	Color2 [A=255, R=169, G=169, B=169]	1	4		16.2237	16.7633	16.5399	16.3409	16.4137	16.5746	16.9397	16.9954	16.5516	16.3699	15.8313	14.8825
P03891	P03891	NU2M_HUMAN	MT-ND2	NADH-ubiquinone oxidoreductase chain 2	Color2 [A=255, R=169, G=169, B=169]	1	4		10.634	13.328	11.8587	13.9288	10.4748	13.5746	14.4965	13.7721	12.477	13.5989	13.1022	11.8579
P03897	P03897	NU3M_HUMAN	MT-ND3	NADH-ubiquinone oxidoreductase chain 3	Color2 [A=255, R=169, G=169, B=169]	1	4		16.6045	16.4078	16.4279	16.0552	16.2582	16.083	16.7245	16.9798	16.1543	16.4244	16.5814	15.6829
P03905	P03905	NU4M_HUMAN	MT-ND4	NADH-ubiquinone oxidoreductase chain 4	Color2 [A=255, R=169, G=169, B=169]	1	4		15.4683	16.0082	15.5427	16.1502	15.3508	15.5719	16.364	16.5554	15.5653	15.2137	15.1828	15.0586
P03915	P03915	NU5M_HUMAN	MT-ND5	NADH-ubiquinone oxidoreductase chain 5	Color2 [A=255, R=169, G=169, B=169]	1	4		15.6225	15.9869	15.6233	15.5126	16.1229	15.8728	16.0074	16.1841	15.7955	15.4545	15.2035	14.2296
P03928	P03928	ATP8_HUMAN	MT-ATP8	ATP synthase protein 8	Color2 [A=255, R=169, G=169, B=169]	1	4		19.3209	19.4814	19.5614	19.511	19.2455	19.5292	19.505	19.7491	19.3804	19.3685	19.0223	19.1261
P03973	P03973	SLPI_HUMAN	SLPI	Antileukoproteinase	Color2 [A=255, R=169, G=169, B=169]	1	4		13.7025	14.8209	14.103	15.9605	13.7852	13.2554	14.2609	14.3189	14.5758	12.2215	13.7771	13.1014
P04004	P04004	VTNC_HUMAN	VTN	Vitronectin	Color2 [A=255, R=169, G=169, B=169]	1	4		19.0045	19.2478	19.309	19.097	19.4166	19.7274	19.7613	19.538	19.0502	19.4321	19.9384	20.1123
P04035	P04035	HMDH_HUMAN	HMGCR	3-hydroxy-3-methylglutaryl-coenzyme A reductase	Color2 [A=255, R=169, G=169, B=169]	1	4		16.7214	16.8484	16.7786	16.7161	16.8095	16.7764	16.7031	16.7755	16.6396	16.6679	16.466	16.6045
P04040	P04040	CATA_HUMAN	CAT	Catalase	Color2 [A=255, R=169, G=169, B=169]	1	4		16.9588	17.7184	17.3279	19.3697	17.3322	16.7806	17.1713	17.188	16.8628	17.2635	17.5675	17.3933
P04049	P04049	RAF1_HUMAN	RAF1	RAF proto-oncogene serine/threonine-protein kinase	Color2 [A=255, R=169, G=169, B=169]	1	4		15.2234	15.7579	15.5444	15.6022	15.8186	15.8374	15.7357	16.1768	15.5284	16.156	16.3657	16.2037
P04049;P10398	P04049;P10398	ARAF_HUMAN;RAF1_HUMAN	ARAF;RAF1	RAF proto-oncogene serine/threonine-protein kinase	Color2 [A=255, R=169, G=169, B=169]	1	4		12.0669	13.7711	13.5617	13.3782	13.4281	13.2263	13.2837	13.8606	13.5815	13.519	14.2887	14.8914
P04049;P10398;P15056	P04049;P10398;P15056	ARAF_HUMAN;BRAF_HUMAN;RAF1_HUMAN	ARAF;BRAF;RAF1	RAF proto-oncogene serine/threonine-protein kinase	Color2 [A=255, R=169, G=169, B=169]	1	4		14.7819	15.8038	15.2236	15.2069	15.3101	15.4365	16.2786	16.3107	15.7904	16.0278	15.9832	16.2763
P04049;P15056	P04049;P15056	BRAF_HUMAN;RAF1_HUMAN	BRAF;RAF1	RAF proto-oncogene serine/threonine-protein kinase	Color2 [A=255, R=169, G=169, B=169]	1	4		11.5055	11.9134	12.453	13.0963	9.76708	13.1206	12.4439	9.6455	7.84412	12.4302	12.5437	12.6658
P04062	P04062	GLCM_HUMAN	GBA	Lysosomal acid glucosylceramidase	Color2 [A=255, R=169, G=169, B=169]	1	4		16.1553	16.11	15.8693	16.4975	16.4552	16.0951	16.5607	16.6232	15.6119	16.0002	16.4575	16.1327
P04075	P04075	ALDOA_HUMAN	ALDOA	Fructose-bisphosphate aldolase A	Color2 [A=255, R=169, G=169, B=169]	1	4		16.5135	16.5358	16.9888	17.1398	16.2092	16.2092	16.2636	17.3638	16.5569	16.1513	16.9263	17.0374
P04075;P09972	P04075;P09972	ALDOA_HUMAN;ALDOC_HUMAN	ALDOA;ALDOC	Fructose-bisphosphate aldolase A	Color2 [A=255, R=169, G=169, B=169]	1	4		11.4549	13.1663	12.5632	13.6205	13.8407	13.4417	13.4983	15.382	12.675	14.3812	14.1452	14.1054
P04080	P04080	CYTB_HUMAN	CSTB	Cystatin-B	Color2 [A=255, R=169, G=169, B=169]	1	4		10.1222	14.4585	14.8201	14.0155	12.7929	13.7151	14.2887	12.8111	17.4757	13.1635	14.4482	13.5247
P04083	P04083	ANXA1_HUMAN	ANXA1	Annexin A1	Color2 [A=255, R=169, G=169, B=169]	1	4		13.8934	15.9041	14.6254	15.9496	13.8917	12.893	16.5989	12.4093	18.0781	12.822	15.3886	14.8185
P04114	P04114	APOB_HUMAN	APOB	Apolipoprotein B-100	Color2 [A=255, R=169, G=169, B=169]	1	4		16.0353	16.5298	15.8246	16.6654	17.9384	17.9947	17.9625	18.022	16.627	16.2316	16.6863	16.5664
P04150	P04150	GCR_HUMAN	NR3C1	Glucocorticoid receptor	Color2 [A=255, R=169, G=169, B=169]	1	4		13.0201	14.3072	14.5855	15.0132	13.7336	14.7384	14.8523	14.4786	13.5498	14.5574	14.7911	14.8756
P04179	P04179	SODM_HUMAN	SOD2	Superoxide dismutase [Mn], mitochondrial	Color2 [A=255, R=169, G=169, B=169]	1	4		15.5565	14.9745	15.7091	15.2881	15.5279	15.1937	15.2169	15.321	14.9993	15.0074	15.3268	15.0134
P04181	P04181	OAT_HUMAN	OAT	Ornithine aminotransferase, mitochondrial	Color2 [A=255, R=169, G=169, B=169]	1	4		23.8558	23.4969	23.6214	23.3443	23.7203	23.4817	23.652	23.6479	24.0745	23.3072	23.151	23.0723
P04183	P04183	KITH_HUMAN	TK1	Thymidine kinase, cytosolic	Color2 [A=255, R=169, G=169, B=169]	1	4		13.1638	13.2335	14.2138	13.7801	13.8979	14.0318	13.3414	13.7907	13.957	14.3694	14.2775	15.0648
P04259	P04259	K2C6B_HUMAN	KRT6B	Keratin, type II cytoskeletal 6B	Color2 [A=255, R=169, G=169, B=169]	1	4		18.1364	17.0815	18.4359	19.6629	16.4236	16.6839	18.3934	17.6572	17.0045	15.4848	16.0153	16.1708
P04259;P04264	P04259;P04264	K2C1_HUMAN;K2C6B_HUMAN	KRT1;KRT6B	Keratin, type II cytoskeletal 6B	Color2 [A=255, R=169, G=169, B=169]	1	4		24.0955	24.644	25.0263	26.5702	24.5264	23.726	23.2624	23.7316	24.3766	23.1812	23.8913	23.4208
P04259;P13647;P48668	P04259;P13647;P48668	K2C5_HUMAN;K2C6B_HUMAN;K2C6C_HUMAN	KRT5;KRT6B;KRT6C	Keratin, type II cytoskeletal 6B	Color2 [A=255, R=169, G=169, B=169]	1	4		13.6287	13.8641	13.2941	16.1512	11.3812	12.9226	10.6545	10.9573	13.3685	11.173	13.6028	14.1439
P04259;P48668	P04259;P48668	K2C6B_HUMAN;K2C6C_HUMAN	KRT6B;KRT6C	Keratin, type II cytoskeletal 6B	Color2 [A=255, R=169, G=169, B=169]	1	4		20.2611	18.905	19.8793	21.7448	16.6939	18.415	20.6444	18.8172	19.2548	18.206	17.8902	17.6514
P04264	P04264	K2C1_HUMAN	KRT1	Keratin, type II cytoskeletal 1	Color2 [A=255, R=169, G=169, B=169]	1	4		26.51	26.6391	26.9033	28.3297	26.1268	25.6708	25.919	25.808	26.5032	25.1216	25.9728	25.4531
P04264;P35908	P04264;P35908	K22E_HUMAN;K2C1_HUMAN	KRT1;KRT2	Keratin, type II cytoskeletal 1	Color2 [A=255, R=169, G=169, B=169]	1	4		23.9859	24.0758	24.1396	26.0857	23.6662	23.1537	23.5536	23.4602	24.4114	22.822	23.6316	23.1275
P04264;P35908;Q7Z794	P04264;P35908;Q7Z794	K22E_HUMAN;K2C1B_HUMAN;K2C1_HUMAN	KRT1;KRT2;KRT77	Keratin, type II cytoskeletal 1	Color2 [A=255, R=169, G=169, B=169]	1	4		24.3151	24.7677	25.3768	26.0998	24.1207	23.5955	23.761	23.644	24.0388	23.1766	23.7015	23.4403
P04279	P04279	SEMG1_HUMAN	SEMG1	Semenogelin-1	Color2 [A=255, R=169, G=169, B=169]	1	4		19.6702	19.8168	19.8166	18.3392	19.3306	18.7426	20.8556	19.6845	19.2023	17.4308	18.2269	18.0687
P04279;Q02383	P04279;Q02383	SEMG1_HUMAN;SEMG2_HUMAN	SEMG1;SEMG2	Semenogelin-1	Color2 [A=255, R=169, G=169, B=169]	1	4		13.5327	13.7757	12.189	10.5937	12.9351	12.5503	15.1487	13.9609	14.3289	12.5777	11.781	12.6341
P04350	P04350	TBB4A_HUMAN	TUBB4A	Tubulin beta-4A chain	Color2 [A=255, R=169, G=169, B=169]	1	4		15.4492	15.337	15.333	14.5231	16.0443	17.0872	17.226	17.0044	16.2386	17.7347	17.8682	17.5326
P04350;P07437;P68371	P04350;P07437;P68371	TBB4A_HUMAN;TBB4B_HUMAN;TBB5_HUMAN	TUBB;TUBB4A;TUBB4B	Tubulin beta-4A chain	Color2 [A=255, R=169, G=169, B=169]	1	4		21.1777	21.2252	21.5184	21.1767	21.3105	21.6884	21.7827	21.3431	21.5504	21.9423	21.9904	22.2437
P04350;P07437;P68371;Q13509	P04350;P07437;P68371;Q13509	TBB3_HUMAN;TBB4A_HUMAN;TBB4B_HUMAN;TBB5_HUMAN	TUBB;TUBB3;TUBB4A;TUBB4B	Tubulin beta-4A chain	Color2 [A=255, R=169, G=169, B=169]	1	4		19.8485	19.9395	20.1708	20.0442	20.2306	20.6034	20.5332	20.4166	20.0519	20.9776	20.825	20.7306
P04350;P07437;P68371;Q13509;Q13885;Q9BUF5;Q9BVA1	P04350;P07437;P68371;Q13509;Q13885;Q9BUF5;Q9BVA1	TBB2A_HUMAN;TBB2B_HUMAN;TBB3_HUMAN;TBB4A_HUMAN;TBB4B_HUMAN;TBB5_HUMAN;TBB6_HUMAN	TUBB;TUBB2A;TUBB2B;TUBB3;TUBB4A;TUBB4B;TUBB6	Tubulin beta-4A chain	Color2 [A=255, R=169, G=169, B=169]	1	4		20.0449	20.5931	20.0289	20.6527	20.9165	21.0068	20.9696	21.0726	20.8219	21.4476	21.5931	21.5401
P04350;P07437;P68371;Q13509;Q13885;Q9BUF5;Q9BVA1;Q9H4B7	A6NNZ2;P04350;P07437;P68371;Q13509;Q13885;Q3ZCM7;Q9BUF5;Q9BVA1;Q9H4B7	TBB1_HUMAN;TBB2A_HUMAN;TBB2B_HUMAN;TBB3_HUMAN;TBB4A_HUMAN;TBB4B_HUMAN;TBB5_HUMAN;TBB6_HUMAN	TUBB;TUBB1;TUBB2A;TUBB2B;TUBB3;TUBB4A;TUBB4B;TUBB6	Tubulin beta-4A chain	Color2 [A=255, R=169, G=169, B=169]	1	4		19.913	20.1623	20.2654	20.3809	20.3091	20.6432	20.707	20.626	20.0907	21.1914	21.1206	21.4433
P04350;P07437;P68371;Q13509;Q13885;Q9BVA1	P04350;P07437;P68371;Q13509;Q13885;Q9BVA1	TBB2A_HUMAN;TBB2B_HUMAN;TBB3_HUMAN;TBB4A_HUMAN;TBB4B_HUMAN;TBB5_HUMAN	TUBB;TUBB2A;TUBB2B;TUBB3;TUBB4A;TUBB4B	Tubulin beta-4A chain	Color2 [A=255, R=169, G=169, B=169]	1	4		19.3106	19.4825	19.6551	19.1154	19.4615	19.6897	19.7959	19.6528	19.4507	20.0102	20.0543	20.1987
P04350;P07437;P68371;Q13885;Q9BUF5;Q9BVA1	A6NNZ2;P04350;P07437;P68371;Q13885;Q3ZCM7;Q9BUF5;Q9BVA1	TBB2A_HUMAN;TBB2B_HUMAN;TBB4A_HUMAN;TBB4B_HUMAN;TBB5_HUMAN;TBB6_HUMAN	TUBB;TUBB2A;TUBB2B;TUBB4A;TUBB4B;TUBB6	Tubulin beta-4A chain	Color2 [A=255, R=169, G=169, B=169]	1	4		20.8908	20.9431	21.3187	21.5144	21.6615	21.7632	21.8397	21.5593	21.6167	22.3964	22.5445	22.4932
P04350;P07437;P68371;Q13885;Q9BVA1	P04350;P07437;P68371;Q13885;Q9BVA1	TBB2A_HUMAN;TBB2B_HUMAN;TBB4A_HUMAN;TBB4B_HUMAN;TBB5_HUMAN	TUBB;TUBB2A;TUBB2B;TUBB4A;TUBB4B	Tubulin beta-4A chain	Color2 [A=255, R=169, G=169, B=169]	1	4		20.179	20.87	20.6835	20.6876	21.0143	21.2868	21.3231	21.4479	20.9039	21.6105	21.5957	21.7323
P04350;P68371	P04350;P68371	TBB4A_HUMAN;TBB4B_HUMAN	TUBB4A;TUBB4B	Tubulin beta-4A chain	Color2 [A=255, R=169, G=169, B=169]	1	4		18.7439	19.1399	19.0579	18.7499	19.4539	19.6951	19.4855	19.5068	19.5649	20.0564	20.1171	20.4743
P04350;P68371;Q13509	P04350;P68371;Q13509	TBB3_HUMAN;TBB4A_HUMAN;TBB4B_HUMAN	TUBB3;TUBB4A;TUBB4B	Tubulin beta-4A chain	Color2 [A=255, R=169, G=169, B=169]	1	4		17.4574	17.8775	17.9207	17.4467	18.2496	18.4251	18.4962	18.2097	18.5104	19.2373	19.2294	19.0782
P04350;Q9BUF5	P04350;Q9BUF5	TBB4A_HUMAN;TBB6_HUMAN	TUBB4A;TUBB6	Tubulin beta-4A chain	Color2 [A=255, R=169, G=169, B=169]	1	4		14.0571	14.6617	14.6841	14.5062	15.5053	16.1765	16.3558	16.1334	15.9722	16.5626	16.4626	16.6616
P04406	P04406	G3P_HUMAN	GAPDH	Glyceraldehyde-3-phosphate dehydrogenase	Color2 [A=255, R=169, G=169, B=169]	1	4		19.4134	19.8786	19.7023	20.7758	20.1641	19.6826	19.7278	20.0721	19.9583	20.277	20.5519	20.6936
P04424	P04424	ARLY_HUMAN	ASL	Argininosuccinate lyase	Color2 [A=255, R=169, G=169, B=169]	1	4		10.7076	9.23357	10.2563	11.9629	11.5108	11.7307	11.601	9.07705	13.5917	12.0569	12.2229	11.6866
P04439	P04439	HLAA_HUMAN	HLA-A	HLA class I histocompatibility antigen, A alpha chain	Color2 [A=255, R=169, G=169, B=169]	1	4		17.6447	17.7083	17.3804	17.4564	18.8493	18.8605	18.7093	18.7213	18.3715	19.0765	18.9535	19.1481
P04626;P80192;Q15303	P04626;P80192;Q02779;Q15303;Q16584;Q5TCX8	ERBB2_HUMAN;ERBB4_HUMAN;M3K9_HUMAN	ERBB2;ERBB4;MAP3K9	Receptor tyrosine-protein kinase erbB-2	Color2 [A=255, R=169, G=169, B=169]	1	4		15.0452	14.5034	11.0903	12.7246	15.1203	12.8698	14.9012	13.6886	10.4984	14.4298	14.5714	14.1503
P04629	P04629	NTRK1_HUMAN	NTRK1	High affinity nerve growth factor receptor	Color2 [A=255, R=169, G=169, B=169]	1	4		11.4864	12.1385	10.4472	11.1787	12.9643	13.3734	12.6181	12.0213	14.2335	13.4612	12.6332	13.4646
P04632	P04632	CPNS1_HUMAN	CAPNS1	Calpain small subunit 1	Color2 [A=255, R=169, G=169, B=169]	1	4		11.1258	12.1784	9.60321	12.9355	11.9336	12.9842	9.61352	11.3415	13.425	13.462	13.6749	13.7725
P04632;Q96L46	P04632;Q96L46	CPNS1_HUMAN;CPNS2_HUMAN	CAPNS1;CAPNS2	Calpain small subunit 1	Color2 [A=255, R=169, G=169, B=169]	1	4		13.7627	16.8269	15.1938	17.6758	16.8583	15.2445	15.2967	15.2988	16.121	16.8941	17.0053	16.7599
P04746;P0DTE7;P0DTE8;P0DUB6;P19961	P04746;P0DTE7;P0DTE8;P0DUB6;P19961	AMY1A_HUMAN;AMY1B_HUMAN;AMY1C_HUMAN;AMY2B_HUMAN;AMYP_HUMAN	AMY1A;AMY1B;AMY1C;AMY2A;AMY2B	Pancreatic alpha-amylase	Color2 [A=255, R=169, G=169, B=169]	1	4		11.8075	11.1091	9.85023	14.4559	13.1171	12.0108	11.0077	11.5658	12.4721	10.8882	11.7233	13.4217
P04792	P04792	HSPB1_HUMAN	HSPB1	Heat shock protein beta-1	Color2 [A=255, R=169, G=169, B=169]	1	4		21.2506	21.5391	21.5002	21.5742	21.6516	21.6262	21.731	21.8345	21.5489	21.8675	22.0731	22.1956
P04798	P04798	CP1A1_HUMAN	CYP1A1	Cytochrome P450 1A1	Color2 [A=255, R=169, G=169, B=169]	1	4		10.1853	9.54961	13.3167	10.269	14.7682	14.9142	14.6286	14.7257	14.6228	13.7819	13.7356	14.2845
P04818	P04818	TYSY_HUMAN	TYMS	Thymidylate synthase	Color2 [A=255, R=169, G=169, B=169]	1	4		11.2056	13.0192	13.4434	11.9519	13.6387	14.0032	13.0031	13.5288	13.6732	13.9298	14.2086	14.3762
P04843	P04843	RPN1_HUMAN	RPN1	Dolichyl-diphosphooligosaccharide--protein glycosyltransferase subunit 1	Color2 [A=255, R=169, G=169, B=169]	1	4		21.3539	21.4646	21.355	21.2423	21.2298	21.1898	21.3156	21.3238	21.3067	21.1435	21.2228	21.0763
P04844	P04844	RPN2_HUMAN	RPN2	Dolichyl-diphosphooligosaccharide--protein glycosyltransferase subunit 2	Color2 [A=255, R=169, G=169, B=169]	1	4		20.8323	20.968	20.8534	20.5494	20.7863	20.6085	20.7732	20.7815	20.7373	20.3808	20.5037	20.2744
P04899	P04899	GNAI2_HUMAN	GNAI2	Guanine nucleotide-binding protein G(i) subunit alpha-2	Color2 [A=255, R=169, G=169, B=169]	1	4		18.7927	19.44	19.2576	19.0434	19.1714	19.2505	19.1556	19.2368	19.4796	19.2632	19.3937	19.1726
P04899;P08754;P09471;P63096	P04899;P08754;P09471;P63096	GNAI1_HUMAN;GNAI2_HUMAN;GNAI3_HUMAN;GNAO_HUMAN	GNAI1;GNAI2;GNAI3;GNAO1	Guanine nucleotide-binding protein G(i) subunit alpha-2	Color2 [A=255, R=169, G=169, B=169]	1	4		20.8471	20.8072	20.9348	20.7285	20.8182	19.8826	20.4613	20.6743	20.976	20.4405	20.6627	20.6599
P04899;P08754;P09471;P63096;Q5JWF2	A8MTJ3;P04899;P08754;P09471;P11488;P19087;P38405;P63092;P63096;Q5JWF2	GNAI1_HUMAN;GNAI2_HUMAN;GNAI3_HUMAN;GNAO_HUMAN;GNAS1_HUMAN	GNAI1;GNAI2;GNAI3;GNAO1;GNAS	Guanine nucleotide-binding protein G(i) subunit alpha-2	Color2 [A=255, R=169, G=169, B=169]	1	4		23.6325	23.6262	23.7402	23.6697	23.5759	23.4633	23.6605	23.5103	23.6343	23.6312	23.5342	23.5344
P04899;P08754;P63096	P04899;P08754;P63096	GNAI1_HUMAN;GNAI2_HUMAN;GNAI3_HUMAN	GNAI1;GNAI2;GNAI3	Guanine nucleotide-binding protein G(i) subunit alpha-2	Color2 [A=255, R=169, G=169, B=169]	1	4		20.6857	20.6999	20.7206	20.6833	20.8464	20.7253	20.7719	20.8057	20.9608	20.9304	20.8612	20.6109
P04899;P63096	P04899;P63096	GNAI1_HUMAN;GNAI2_HUMAN	GNAI1;GNAI2	Guanine nucleotide-binding protein G(i) subunit alpha-2	Color2 [A=255, R=169, G=169, B=169]	1	4		18.3872	18.996	18.2018	18.9063	18.5673	18.6802	18.2579	18.1503	18.2669	18.1784	18.6156	18.4526
P04908;P0C0S8;P20671;Q16777;Q6FI13;Q7L7L0;Q93077;Q96KK5;Q99878;Q9BTM1	P04908;P0C0S8;P20671;Q16777;Q6FI13;Q7L7L0;Q93077;Q96KK5;Q99878;Q9BTM1	H2A1B_HUMAN;H2A1C_HUMAN;H2A1D_HUMAN;H2A1H_HUMAN;H2A1J_HUMAN;H2A1_HUMAN;H2A2A_HUMAN;H2A2C_HUMAN;H2A3_HUMAN;H2AJ_HUMAN	H2AC12;H2AC14;H2AC17;H2AC19;H2AC20;H2AC6;H2AC7;H2AC8;H2AJ;H2AW	Histone H2A type 1-B/E	Color2 [A=255, R=169, G=169, B=169]	1	4		23.9545	23.2222	23.3154	22.4461	23.075	23.0393	23.5975	23.7705	23.5223	23.4426	23.5649	24.2809
P04908;Q7L7L0;Q93077	P04908;Q7L7L0;Q93077	H2A1B_HUMAN;H2A1C_HUMAN;H2A3_HUMAN	H2AC6;H2AC8;H2AW	Histone H2A type 1-B/E	Color2 [A=255, R=169, G=169, B=169]	1	4		22.37	21.4416	21.7688	21.3616	21.5645	21.0511	21.5581	22.0386	21.9564	21.4751	21.4336	21.7074
P04920	P04920	B3A2_HUMAN	SLC4A2	Anion exchange protein 2	Color2 [A=255, R=169, G=169, B=169]	1	4		18.4428	18.7506	18.5768	18.5337	18.4303	18.5193	18.7691	18.7189	18.4464	18.9553	18.9281	18.6865
P05023	P05023	AT1A1_HUMAN	ATP1A1	Sodium/potassium-transporting ATPase subunit alpha-1	Color2 [A=255, R=169, G=169, B=169]	1	4		21.2854	21.5366	21.497	21.6175	21.7922	21.8393	21.7494	21.839	21.7821	21.8873	21.7833	21.7437
P05023;P13637	P05023;P13637	AT1A1_HUMAN;AT1A3_HUMAN	ATP1A1;ATP1A3	Sodium/potassium-transporting ATPase subunit alpha-1	Color2 [A=255, R=169, G=169, B=169]	1	4		22.2134	22.1272	22.0611	21.848	22.3813	22.1985	22.1532	22.2138	22.1281	22.2291	22.3084	22.2634
P05023;P13637;P20648;P50993	P05023;P13637;P20648;P50993;P54707;Q13733	AT1A1_HUMAN;AT1A2_HUMAN;AT1A3_HUMAN;ATP4A_HUMAN	ATP1A1;ATP1A2;ATP1A3;ATP4A	Sodium/potassium-transporting ATPase subunit alpha-1	Color2 [A=255, R=169, G=169, B=169]	1	4		19.7816	19.9927	19.9345	20.1842	20.2596	20.3671	20.3833	20.4194	20.2653	20.3168	20.343	20.1585
P05023;P13637;P50993	P05023;P13637;P20648;P50993	AT1A1_HUMAN;AT1A2_HUMAN;AT1A3_HUMAN	ATP1A1;ATP1A2;ATP1A3	Sodium/potassium-transporting ATPase subunit alpha-1	Color2 [A=255, R=169, G=169, B=169]	1	4		20.6074	20.7205	20.7952	20.6543	21.045	20.8792	20.7895	20.8713	20.9891	20.8856	21.0646	20.8636
P05023;P50993	P05023;P50993;Q13733	AT1A1_HUMAN;AT1A2_HUMAN	ATP1A1;ATP1A2	Sodium/potassium-transporting ATPase subunit alpha-1	Color2 [A=255, R=169, G=169, B=169]	1	4		16.4791	16.9494	17.0039	17.3608	16.9321	17.1889	17.035	17.2303	17.4774	17.7885	16.3613	17.2732
P05026	P05026	AT1B1_HUMAN	ATP1B1	Sodium/potassium-transporting ATPase subunit beta-1	Color2 [A=255, R=169, G=169, B=169]	1	4		20.0354	20.1163	20.0229	20.3482	20.4039	20.0642	20.4077	20.5088	20.0398	20.3362	20.5582	20.2339
P05067	P05067	A4_HUMAN	APP	Amyloid-beta precursor protein	Color2 [A=255, R=169, G=169, B=169]	1	4		16.1733	15.7315	15.5664	16.1339	16.7098	16.9028	16.5026	16.1341	16.5404	16.9167	16.6064	17.0242
P05067;Q06481	P05067;Q06481	A4_HUMAN;APLP2_HUMAN	APLP2;APP	Amyloid-beta precursor protein	Color2 [A=255, R=169, G=169, B=169]	1	4		11.8565	13.2848	10.9704	11.8971	13.7584	14.1887	13.9735	13.281	14.5294	13.2934	14.9728	14.6491
P05089	P05089	ARGI1_HUMAN	ARG1	Arginase-1	Color2 [A=255, R=169, G=169, B=169]	1	4		17.8954	18.2463	18.16	20.1741	17.8321	16.9931	17.2106	17.2915	17.7207	16.4197	17.8388	17.2545
P05090	P05090	APOD_HUMAN	APOD	Apolipoprotein D	Color2 [A=255, R=169, G=169, B=169]	1	4		8.87095	11.6968	10.9316	13.9618	12.1128	10.2534	10.6089	10.8383	12.6434	10.2183	12.2034	10.6684
P05091	P05091	ALDH2_HUMAN	ALDH2	Aldehyde dehydrogenase, mitochondrial	Color2 [A=255, R=169, G=169, B=169]	1	4		21.6401	21.2053	21.4142	21.3132	21.8458	21.5629	21.7129	21.6456	21.8381	21.347	21.1826	21.2343
P05109	P05109	S10A8_HUMAN	S100A8	Protein S100-A8	Color2 [A=255, R=169, G=169, B=169]	1	4		17.1115	16.7793	17.3183	17.2099	17.3794	15.655	17.1447	16.4439	17.3181	15.8211	17.2864	17.2136
P05114	P05114	HMGN1_HUMAN	HMGN1	Non-histone chromosomal protein HMG-14	Color2 [A=255, R=169, G=169, B=169]	1	4		13.6377	13.5346	13.9011	15.7729	14.7435	13.3703	14.5354	15.6156	14.8332	14.5058	14.4376	15.4635
P05120	P05120	PAI2_HUMAN	SERPINB2	Plasminogen activator inhibitor 2	Color2 [A=255, R=169, G=169, B=169]	1	4		13.4288	12.244	13.867	15.4791	13.5839	12.1267	12.0833	12.929	13.3064	11.6484	12.1995	12.3306
P05141	P05141	ADT2_HUMAN	SLC25A5	ADP/ATP translocase 2	Color2 [A=255, R=169, G=169, B=169]	1	4		23.0491	23.2926	23.164	23.0123	23.4998	23.4566	23.5592	23.6783	23.5873	23.2926	23.0702	22.993
P05141;P12235	P05141;P12235	ADT1_HUMAN;ADT2_HUMAN	SLC25A4;SLC25A5	ADP/ATP translocase 2	Color2 [A=255, R=169, G=169, B=169]	1	4		22.1246	22.1269	22.1743	21.5682	21.9503	21.7551	22.1006	21.9561	21.8773	21.2909	21.287	21.1029
P05141;P12235;P12236	P05141;P12235;P12236	ADT1_HUMAN;ADT2_HUMAN;ADT3_HUMAN	SLC25A4;SLC25A5;SLC25A6	ADP/ATP translocase 2	Color2 [A=255, R=169, G=169, B=169]	1	4		24.5804	24.7891	24.3909	24.3547	24.3853	24.545	24.6755	24.9551	24.55	24.281	23.8445	23.7178
P05141;P12235;P12236;Q9H0C2	P05141;P12235;P12236;Q9H0C2	ADT1_HUMAN;ADT2_HUMAN;ADT3_HUMAN;ADT4_HUMAN	SLC25A31;SLC25A4;SLC25A5;SLC25A6	ADP/ATP translocase 2	Color2 [A=255, R=169, G=169, B=169]	1	4		24.495	24.6453	25.0849	24.4403	24.5968	24.605	24.8905	24.7761	24.6978	24.4554	24.4443	24.4723
P05141;P12236	P05141;P12236	ADT2_HUMAN;ADT3_HUMAN	SLC25A5;SLC25A6	ADP/ATP translocase 2	Color2 [A=255, R=169, G=169, B=169]	1	4		23.9985	23.9042	24.0182	23.9927	24.0349	24.1061	24.2621	24.2708	24.0991	23.9155	23.7789	23.6192
P05165	P05165	PCCA_HUMAN	PCCA	Propionyl-CoA carboxylase alpha chain, mitochondrial	Color2 [A=255, R=169, G=169, B=169]	1	4		25.459	25.246	25.3846	24.8353	25.1221	25.0238	25.0884	24.9868	25.1591	24.5295	24.5602	24.3281
P05166	P05166	PCCB_HUMAN	PCCB	Propionyl-CoA carboxylase beta chain, mitochondrial	Color2 [A=255, R=169, G=169, B=169]	1	4		26.0853	25.8726	26.0592	25.6389	25.8436	25.6577	25.7851	25.563	25.8693	25.3481	25.3255	25.2045
P05186	P05186	PPBT_HUMAN	ALPL	Alkaline phosphatase, tissue-nonspecific isozyme	Color2 [A=255, R=169, G=169, B=169]	1	4		9.51932	11.0408	11.8368	11.5465	13.4893	12.604	11.6075	12.6935	9.99569	12.4701	12.3702	11.4327
P05198	P05198	IF2A_HUMAN	EIF2S1	Eukaryotic translation initiation factor 2 subunit 1	Color2 [A=255, R=169, G=169, B=169]	1	4		16.9855	17.5153	17.1034	17.5481	17.2013	17.5862	17.57	18.2759	17.1417	17.7714	18.0124	18.7579
P05204	P05204	HMGN2_HUMAN	HMGN2	Non-histone chromosomal protein HMG-17	Color2 [A=255, R=169, G=169, B=169]	1	4		14.8316	14.3739	15.2445	15.731	15.2598	13.7622	14.9569	15.3939	14.5304	14.5994	15.4129	15.869
P05204;Q15651	P05204;Q15651	HMGN2_HUMAN;HMGN3_HUMAN	HMGN2;HMGN3	Non-histone chromosomal protein HMG-17	Color2 [A=255, R=169, G=169, B=169]	1	4		13.0562	12.754	12.9162	15.6841	14.2373	13.6122	13.4811	14.708	13.5025	13.8042	13.7716	14.2588
P05386	P05386	RLA1_HUMAN	RPLP1	60S acidic ribosomal protein P1	Color2 [A=255, R=169, G=169, B=169]	1	4		18.1829	18.4665	18.2276	17.5889	18.4868	18.9029	18.7208	18.8175	18.8007	18.8434	18.4832	18.35
P05387	P05387	RLA2_HUMAN	RPLP2	60S acidic ribosomal protein P2	Color2 [A=255, R=169, G=169, B=169]	1	4		17.455	16.9778	17.394	17.036	16.8397	17.399	17.1594	17.1677	17.9514	17.408	17.2778	17.8396
P05388	P05388	RLA0_HUMAN	RPLP0	60S acidic ribosomal protein P0	Color2 [A=255, R=169, G=169, B=169]	1	4		19.5441	19.5289	19.5718	19.5457	19.6087	19.745	19.6409	19.6918	19.8919	19.8617	19.9225	19.8924
P05412	P05412	JUN_HUMAN	JUN	Transcription factor Jun	Color2 [A=255, R=169, G=169, B=169]	1	4		12.7791	13.2472	13.2396	13.8571	13.0305	13.6099	13.9287	13.4117	13.5107	14.1474	14.449	14.1642
P05412;P17275;P17535	P05412;P17275;P17535	JUNB_HUMAN;JUND_HUMAN;JUN_HUMAN	JUN;JUNB;JUND	Transcription factor Jun	Color2 [A=255, R=169, G=169, B=169]	1	4		11.6382	15.1953	15.0348	14.8372	14.259	15.079	15.4383	14.735	13.0713	14.9419	14.8777	14.0007
P05412;P17535	P05412;P17535	JUND_HUMAN;JUN_HUMAN	JUN;JUND	Transcription factor Jun	Color2 [A=255, R=169, G=169, B=169]	1	4		11.7396	12.6934	11.7837	13.4644	13.9505	14.7869	13.4422	11.775	13.751	13.5934	14.734	14.7279
P05413	P05413	FABPH_HUMAN	FABP3	Fatty acid-binding protein, heart	Color2 [A=255, R=169, G=169, B=169]	1	4		14.1	14.4531	14.5444	14.6468	14.9967	14.3534	15.3996	15.0799	13.3711	14.2931	13.5968	15.1766
P05423	P05423	RPC4_HUMAN	POLR3D	DNA-directed RNA polymerase III subunit RPC4	Color2 [A=255, R=169, G=169, B=169]	1	4		15.7954	15.5679	15.5874	15.0831	15.5539	15.8851	16.533	15.7539	16.0641	15.9883	15.8726	16.5335
P05455	P05455	LA_HUMAN	SSB	Lupus La protein	Color2 [A=255, R=169, G=169, B=169]	1	4		14.2895	14.6457	14.4517	15.0549	14.5494	14.5733	14.2268	15.0318	14.3602	15.0164	14.9612	15.2263
P05496;P48201;Q06055	P05496;P48201;Q06055	AT5G1_HUMAN;AT5G2_HUMAN;AT5G3_HUMAN	ATP5MC1;ATP5MC2;ATP5MC3	ATP synthase F(0) complex subunit C1, mitochondrial	Color2 [A=255, R=169, G=169, B=169]	1	4		12.6235	11.5813	8.68959	10.5223	10.9057	7.94204	13.0457	13.4626	11.6092	10.4187	12.1618	11.2188
P05549;Q6VUC0	P05549;Q6VUC0	AP2A_HUMAN;AP2E_HUMAN	TFAP2A;TFAP2E	Transcription factor AP-2-alpha	Color2 [A=255, R=169, G=169, B=169]	1	4		12.4275	10.8328	9.83568	14.1735	12.8881	14.94	11.7215	14.2585	14.5927	14.9353	15.7229	14.6619
P05549;Q6VUC0;Q92754	P05549;Q92481;Q92754;Q6VUC0	AP2A_HUMAN;AP2C_HUMAN;AP2E_HUMAN	TFAP2A;TFAP2C;TFAP2E	Transcription factor AP-2-alpha	Color2 [A=255, R=169, G=169, B=169]	1	4		9.8074	8.99979	10.76	10.6972	15.5241	17.0384	16.1939	16.7313	16.7469	17.8124	17.7982	17.7172
P05549;Q92754	P05549;Q92754	AP2A_HUMAN;AP2C_HUMAN	TFAP2A;TFAP2C	Transcription factor AP-2-alpha	Color2 [A=255, R=169, G=169, B=169]	1	4		9.36662	11.4047	10.2075	10.6891	10.7238	13.2129	13.3093	12.4577	14.1098	13.819	13.5191	13.9186
P05556	P05556	ITB1_HUMAN	ITGB1	Integrin beta-1	Color2 [A=255, R=169, G=169, B=169]	1	4		18.6642	18.5307	18.3609	18.5895	18.1831	18.109	18.2455	18.2947	18.217	18.456	18.5106	18.4461
P05771;P17252	P05771;P17252	KPCA_HUMAN;KPCB_HUMAN	PRKCA;PRKCB	Protein kinase C beta type	Color2 [A=255, R=169, G=169, B=169]	1	4		12.731	13.8771	14.7817	16.0916	14.8799	15.3137	15.0283	15.1707	14.1043	15.5532	15.7951	15.6663
P05771;P17252;Q04759;Q05655	P05771;P17252;Q04759;Q05655	KPCA_HUMAN;KPCB_HUMAN;KPCD_HUMAN;KPCT_HUMAN	PRKCA;PRKCB;PRKCD;PRKCQ	Protein kinase C beta type	Color2 [A=255, R=169, G=169, B=169]	1	4		8.78214	10.2817	10.7598	12.0267	12.7493	13.0446	13.8656	13.3705	10.77	14.2446	13.2994	13.53
P05783	P05783	K1C18_HUMAN	KRT18	Keratin, type I cytoskeletal 18	Color2 [A=255, R=169, G=169, B=169]	1	4		16.575	14.9897	14.3678	11.7916	13.7291	11.5845	11.3765	10.8503	10.9066	10.4566	14.0632	9.77748
P05787	P05787	K2C8_HUMAN	KRT8	Keratin, type II cytoskeletal 8	Color2 [A=255, R=169, G=169, B=169]	1	4		17.638	16.3947	16.1042	13.5132	11.9279	11.5873	8.01314	12.0123	11.4051	15.7044	14.094	13.0082
P05787;P08670;P17661;P41219	P05787;P08670;P08729;P17661;P41219	DESM_HUMAN;K2C8_HUMAN;PERI_HUMAN;VIME_HUMAN	DES;KRT8;PRPH;VIM	Keratin, type II cytoskeletal 8	Color2 [A=255, R=169, G=169, B=169]	1	4		20.8555	20.6093	20.659	20.5662	20.5364	20.2984	20.1861	20.2028	20.6444	20.2093	20.067	19.9583
P05787;P08670;P17661;P41219;Q9NSB2	P05787;P08670;P08729;P17661;P41219;Q9NSB2	DESM_HUMAN;K2C8_HUMAN;KRT84_HUMAN;PERI_HUMAN;VIME_HUMAN	DES;KRT8;KRT84;PRPH;VIM	Keratin, type II cytoskeletal 8	Color2 [A=255, R=169, G=169, B=169]	1	4		23.4027	23.114	23.3419	23.1371	22.9342	22.833	22.8044	22.7068	22.9546	22.9962	23.1252	22.9168
P05787;P19013;Q6KB66	P05787;P08729;P14136;P19013;Q6KB66	K2C4_HUMAN;K2C80_HUMAN;K2C8_HUMAN	KRT4;KRT8;KRT80	Keratin, type II cytoskeletal 8	Color2 [A=255, R=169, G=169, B=169]	1	4		15.7943	15.2406	14.8017	15.6912	13.436	12.3585	15.2695	12.0293	15.732	12.1569	16.0036	14.5061
P06132	P06132	DCUP_HUMAN	UROD	Uroporphyrinogen decarboxylase	Color2 [A=255, R=169, G=169, B=169]	1	4		10.5169	13.4782	14.0828	14.4403	12.9145	13.2935	13.5025	12.3895	10.1807	13.4221	14.1233	13.8586
P06213	P06213	INSR_HUMAN	INSR	Insulin receptor	Color2 [A=255, R=169, G=169, B=169]	1	4		11.2791	11.4207	12.7203	11.8488	13.2503	12.2758	13.1793	14.416	13.8026	13.9634	13.9321	13.8651
P06213;P08069	P06213;P08069;P14616	IGF1R_HUMAN;INSR_HUMAN	IGF1R;INSR	Insulin receptor	Color2 [A=255, R=169, G=169, B=169]	1	4		12.9542	13.0206	13.1932	12.9203	13.583	14.4414	13.612	13.9067	11.6976	14.5157	13.4479	13.2763
P06241	P06241	FYN_HUMAN	FYN	Tyrosine-protein kinase Fyn	Color2 [A=255, R=169, G=169, B=169]	1	4		15.5263	16.0073	15.8052	15.8949	15.2779	15.909	15.9505	15.9051	15.3755	15.7015	16.2479	15.7917
P06241;P07947	P06241;P07947	FYN_HUMAN;YES_HUMAN	FYN;YES1	Tyrosine-protein kinase Fyn	Color2 [A=255, R=169, G=169, B=169]	1	4		16.4511	16.2051	16.0984	16.9313	17.2022	16.9994	17.0737	16.866	16.79	17.5776	17.4035	17.4793
P06241;P07947;P07948;P11362;P21802;P22455;P51451;Q8IZL9;Q9UPZ9	P06239;P06241;P07947;P07948;P08631;P09769;P11362;P20794;P21802;P22455;P22607;P51451;Q8IZL9;Q9UPZ9	BLK_HUMAN;CDK20_HUMAN;CILK1_HUMAN;FGFR1_HUMAN;FGFR2_HUMAN;FGFR4_HUMAN;FYN_HUMAN;LYN_HUMAN;YES_HUMAN	BLK;CDK20;CILK1;FGFR1;FGFR2;FGFR4;FYN;LYN;YES1	Tyrosine-protein kinase Fyn	Color2 [A=255, R=169, G=169, B=169]	1	4		19.6351	19.7517	19.6894	11.4333	10.0148	10.8609	11.5177	19.821	19.6282	20.0499	20.0281	20.0023
P06241;P07947;P07948;P12931	P06241;P07947;P07948;P08631;P12931	FYN_HUMAN;LYN_HUMAN;SRC_HUMAN;YES_HUMAN	FYN;LYN;SRC;YES1	Tyrosine-protein kinase Fyn	Color2 [A=255, R=169, G=169, B=169]	1	4		17.7852	18.1025	18.0698	18.0908	18.2892	18.4348	18.7449	18.4179	18.2052	18.372	18.3189	18.2084
P06241;P07947;P12931	P06241;P07947;P12931	FYN_HUMAN;SRC_HUMAN;YES_HUMAN	FYN;SRC;YES1	Tyrosine-protein kinase Fyn	Color2 [A=255, R=169, G=169, B=169]	1	4		17.1252	17.7331	17.2264	17.2656	17.5903	17.6963	17.7406	17.8854	16.283	18.1976	17.882	17.5944
P06280	P06280	AGAL_HUMAN	GLA	Alpha-galactosidase A	Color2 [A=255, R=169, G=169, B=169]	1	4		13.5021	14.3952	13.616	14.7842	14.3873	14.5495	14.5967	14.5486	13.4823	14.4337	15.0207	14.8751
P06396	P06396	GELS_HUMAN	GSN	Gelsolin	Color2 [A=255, R=169, G=169, B=169]	1	4		10.8649	11.5221	12.7766	15.0711	12.8677	12.336	9.14119	10.2296	13.3814	11.7301	13.051	13.1315
P06454	P06454	PTMA_HUMAN	PTMA	Prothymosin alpha	Color2 [A=255, R=169, G=169, B=169]	1	4		11.1277	11.8109	12.8843	13.5141	12.21	12.1201	12.0433	11.5394	11.9302	12.9173	13.0208	11.9663
P06493	P06493	CDK1_HUMAN	CDK1	Cyclin-dependent kinase 1	Color2 [A=255, R=169, G=169, B=169]	1	4		18.3731	18.5493	18.3001	18.6693	18.3999	18.5839	18.5001	18.6441	18.6567	18.8808	18.9244	19.1128
P06493;P11802;P24941;P50750;Q00535;Q00536;Q00537;Q14004;Q9NYV4	O94921;P06493;P11802;P24941;P50750;Q00526;Q00534;Q00535;Q00536;Q00537;Q07002;Q14004;Q96Q40;Q9NYV4	CDK12_HUMAN;CDK13_HUMAN;CDK16_HUMAN;CDK17_HUMAN;CDK1_HUMAN;CDK2_HUMAN;CDK4_HUMAN;CDK5_HUMAN;CDK9_HUMAN	CDK1;CDK12;CDK13;CDK16;CDK17;CDK2;CDK4;CDK5;CDK9	Cyclin-dependent kinase 1	Color2 [A=255, R=169, G=169, B=169]	1	4		19.5136	19.6133	19.6855	19.6495	19.6618	19.7798	19.7756	19.8085	19.6823	20.02	20.0003	9.80186
P06493;P24941	P06493;P24941;Q00526	CDK1_HUMAN;CDK2_HUMAN	CDK1;CDK2	Cyclin-dependent kinase 1	Color2 [A=255, R=169, G=169, B=169]	1	4		16.0431	15.8801	15.1107	16.3255	15.8628	15.433	15.957	16.4212	16.0425	16.1354	16.4927	16.6329
P06576	P06576	ATPB_HUMAN	ATP5F1B	ATP synthase subunit beta, mitochondrial	Color2 [A=255, R=169, G=169, B=169]	1	4		24.5091	24.2207	24.3126	24.1674	24.2426	24.0832	24.2589	24.2407	24.2755	23.8519	23.7508	23.7417
P06702	P06702	S10A9_HUMAN	S100A9	Protein S100-A9	Color2 [A=255, R=169, G=169, B=169]	1	4		17.03	17.1129	17.5011	16.898	17.1896	15.8292	16.8758	16.6117	17.5072	15.8827	17.0124	17.3316
P06730	P06730	IF4E_HUMAN	EIF4E	Eukaryotic translation initiation factor 4E	Color2 [A=255, R=169, G=169, B=169]	1	4		14.7028	15.2911	15.0335	15.3138	14.8049	15.4941	15.4193	15.348	14.8249	15.3926	15.285	15.2477
P06732	P06732	KCRM_HUMAN	CKM	Creatine kinase M-type	Color2 [A=255, R=169, G=169, B=169]	1	4		11.1675	11.4135	11.7096	10.2597	10.6954	10.0477	11.7537	14.922	9.59075	10.8297	11.025	10.7445
P06733	P06733	ENOA_HUMAN	ENO1	Alpha-enolase	Color2 [A=255, R=169, G=169, B=169]	1	4		17.7702	17.8831	17.8161	18.5913	18.254	18.1183	18.0634	18.2584	18.1254	18.9355	19.1141	19.0859
P06733;P13929	P06733;P09104;P13929	ENOA_HUMAN;ENOB_HUMAN	ENO1;ENO3	Alpha-enolase	Color2 [A=255, R=169, G=169, B=169]	1	4		11.5074	15.7626	16.0647	16.8184	16.6724	14.5601	16.3096	10.1781	16.2647	17.0677	17.2794	16.4525
P06737	P06737	PYGL_HUMAN	PYGL	Glycogen phosphorylase, liver form	Color2 [A=255, R=169, G=169, B=169]	1	4		13.1966	13.9443	14.1507	13.1835	14.0996	14.2768	13.8974	13.7831	14.0916	13.5034	13.3626	13.2806
P06737;P11216	P06737;P11216;P11217	PYGB_HUMAN;PYGL_HUMAN	PYGB;PYGL	Glycogen phosphorylase, liver form	Color2 [A=255, R=169, G=169, B=169]	1	4		15.2265	15.2971	14.6964	15.7183	15.2647	15.0252	15.5656	16.3297	15.4627	15.472	15.7916	14.7388
P06744	P06744	G6PI_HUMAN	GPI	Glucose-6-phosphate isomerase	Color2 [A=255, R=169, G=169, B=169]	1	4		15.5629	15.4281	15.8677	15.6595	14.1193	15.3164	15.3523	15.4045	15.399	14.6562	14.664	14.5605
P06744;Q8N196	P06744;Q8N196	G6PI_HUMAN;SIX5_HUMAN	GPI;SIX5	Glucose-6-phosphate isomerase	Color2 [A=255, R=169, G=169, B=169]	1	4		10.0932	14.852	13.7938	15.0143	14.7233	12.8179	15.0952	11.4416	12.3927	14.4708	13.3963	14.6265
P06746	P06746	DPOLB_HUMAN	POLB	DNA polymerase beta	Color2 [A=255, R=169, G=169, B=169]	1	4		10.8271	7.3781	12.7122	10.791	12.6625	12.0666	12.6654	12.9566	10.7823	12.6037	13.3482	13.4806
P06748	P06748	NPM_HUMAN	NPM1	Nucleophosmin	Color2 [A=255, R=169, G=169, B=169]	1	4		22.7018	22.8598	23.0006	22.8403	23.0536	23.0892	22.6301	22.893	23.0344	22.818	22.7663	22.4598
P06753	P06753	TPM3_HUMAN	TPM3	Tropomyosin alpha-3 chain	Color2 [A=255, R=169, G=169, B=169]	1	4		13.8932	10.4285	13.7461	16.2563	14.9994	13.3501	13.8698	14.5454	14.0851	14.478	15.4778	15.746
P06753;P07951;P09493;P67936	P06753;P07951;P09493;P67936	TPM1_HUMAN;TPM2_HUMAN;TPM3_HUMAN;TPM4_HUMAN	TPM1;TPM2;TPM3;TPM4	Tropomyosin alpha-3 chain	Color2 [A=255, R=169, G=169, B=169]	1	4		16.0175	16.2954	15.5875	17.9262	17.0348	16.6331	16.2992	15.9853	17.3006	17.4266	17.584	17.6214
P06753;P67936	P06753;P07951;P09493;P67936	TPM3_HUMAN;TPM4_HUMAN	TPM3;TPM4	Tropomyosin alpha-3 chain	Color2 [A=255, R=169, G=169, B=169]	1	4		14.8137	16.1342	13.7502	14.8047	15.0952	15.0817	11.4875	15.6464	15.0761	14.027	14.6925	14.2884
P06756	P06756	ITAV_HUMAN	ITGAV	Integrin alpha-V	Color2 [A=255, R=169, G=169, B=169]	1	4		15.8238	16.0798	15.9884	16.0278	16.0394	15.68	15.9856	16.0101	15.4584	15.8069	15.8423	16.081
P06858	P06858	LIPL_HUMAN	LPL	Lipoprotein lipase	Color2 [A=255, R=169, G=169, B=169]	1	4		16.1117	15.9929	16.0376	16.1448	16.5711	16.5285	16.7178	16.7707	16.4579	16.684	16.4526	16.6999
P06865	P06865	HEXA_HUMAN	HEXA	Beta-hexosaminidase subunit alpha	Color2 [A=255, R=169, G=169, B=169]	1	4		12.0515	11.8894	11.8552	11.088	11.788	9.6641	13.1425	13.899	10.8576	13.9132	13.8673	14.7189
P07093	P07093	GDN_HUMAN	SERPINE2	Glia-derived nexin	Color2 [A=255, R=169, G=169, B=169]	1	4		11.4241	12.7258	13.4717	12.3299	13.807	13.5886	13.1912	13.6573	13.3503	12.6934	13.626	13.4976
P07099	P07099	HYEP_HUMAN	EPHX1	Epoxide hydrolase 1	Color2 [A=255, R=169, G=169, B=169]	1	4		17.5754	17.6127	17.304	17.2549	17.601	17.3249	17.9883	17.9117	17.3445	17.4709	17.8301	17.2923
P07195	P07195	LDHB_HUMAN	LDHB	L-lactate dehydrogenase B chain	Color2 [A=255, R=169, G=169, B=169]	1	4		16.2262	16.196	16.1177	16.3965	16.5529	16.784	16.7986	16.6185	16.3684	17.1454	17.1269	17.4026
P07196	P07196	NFL_HUMAN	NEFL	Neurofilament light polypeptide	Color2 [A=255, R=169, G=169, B=169]	1	4		22.3947	22.3797	22.1583	22.0572	21.6327	21.7384	21.6197	21.4349	21.75	21.5544	21.4108	21.278
P07196;P08670;P12036;P17661;Q16352	P07196;P07197;P08670;P12036;P17661;Q16352	AINX_HUMAN;DESM_HUMAN;NFH_HUMAN;NFL_HUMAN;VIME_HUMAN	DES;INA;NEFH;NEFL;VIM	Neurofilament light polypeptide	Color2 [A=255, R=169, G=169, B=169]	1	4		23.6467	23.4407	23.6929	23.383	23.1051	23.2073	23.0912	22.913	23.3281	23.1977	23.0707	22.7867
P07196;P12036;Q16352	P07196;P07197;P12036;Q16352	AINX_HUMAN;NFH_HUMAN;NFL_HUMAN	INA;NEFH;NEFL	Neurofilament light polypeptide	Color2 [A=255, R=169, G=169, B=169]	1	4		19.7516	19.1074	19.4136	18.9276	18.9163	18.6783	18.7461	18.445	19.2018	18.5387	18.6959	18.5724
P07196;Q16352	P07196;P07197;Q16352	AINX_HUMAN;NFL_HUMAN	INA;NEFL	Neurofilament light polypeptide	Color2 [A=255, R=169, G=169, B=169]	1	4		19.4527	19.8555	19.3481	19.4357	18.6624	19.0844	18.9004	18.7506	19.425	19.0264	18.7438	18.4301
P07199	P07199	CENPB_HUMAN	CENPB	Major centromere autoantigen B	Color2 [A=255, R=169, G=169, B=169]	1	4		16.835	18.1144	17.9474	18.0402	17.2396	18.2043	17.8856	18.1355	17.1786	18.2886	18.3906	18.3978
P07203	P07203	GPX1_HUMAN	GPX1	Glutathione peroxidase 1	Color2 [A=255, R=169, G=169, B=169]	1	4		23.3894	22.8355	22.8961	23.0919	22.9795	22.6694	22.8429	22.7382	23.5691	23.182	23.0148	22.9239
P07237	P07237	PDIA1_HUMAN	P4HB	Protein disulfide-isomerase	Color2 [A=255, R=169, G=169, B=169]	1	4		17.0163	17.4258	17.2474	17.7474	19.124	19.136	19.5671	19.1149	18.2904	20.5913	20.6675	20.6897
P07305	P07305	H10_HUMAN	H1-0	Histone H1.0	Color2 [A=255, R=169, G=169, B=169]	1	4		23.1528	22.0322	23.0488	21.8512	23.1275	22.2688	22.7091	23.7476	23.0645	22.9014	22.7608	23.3707
P07339	P07339	CATD_HUMAN	CTSD	Cathepsin D	Color2 [A=255, R=169, G=169, B=169]	1	4		17.3528	18.0753	18.0229	19.4021	18.3884	17.381	17.7394	17.252	17.7655	17.4954	18.02	17.7694
P07355	A6NMY6;P07355	ANXA2_HUMAN	ANXA2	Annexin A2	Color2 [A=255, R=169, G=169, B=169]	1	4		17.0576	17.8215	17.6281	19.2346	18.0573	17.5578	17.4613	17.4595	18.1707	18.533	18.9583	19.072
P07384	P07384	CAN1_HUMAN	CAPN1	Calpain-1 catalytic subunit	Color2 [A=255, R=169, G=169, B=169]	1	4		15.6202	16.7179	16.2423	17.1164	16.5267	15.7577	16.5995	16.4063	16.3856	16.5196	16.8154	16.4903
P07437	P07437	TBB5_HUMAN	TUBB	Tubulin beta chain	Color2 [A=255, R=169, G=169, B=169]	1	4		19.7046	20.1685	20.1626	20.1978	20.3447	20.5756	20.5177	20.4913	20.2358	20.9063	20.9188	21.0306
P07437;P68371;Q13509;Q13885;Q9BVA1	P07437;P68371;Q13509;Q13885;Q9BVA1	TBB2A_HUMAN;TBB2B_HUMAN;TBB3_HUMAN;TBB4B_HUMAN;TBB5_HUMAN	TUBB;TUBB2A;TUBB2B;TUBB3;TUBB4B	Tubulin beta chain	Color2 [A=255, R=169, G=169, B=169]	1	4		20.3201	20.8762	20.9028	20.885	21.7249	21.5299	21.9376	21.4252	21.5285	21.8504	22.2021	22.4462
P07437;P68371;Q13885;Q9BVA1	P07437;P68371;Q13885;Q9BVA1	TBB2A_HUMAN;TBB2B_HUMAN;TBB4B_HUMAN;TBB5_HUMAN	TUBB;TUBB2A;TUBB2B;TUBB4B	Tubulin beta chain	Color2 [A=255, R=169, G=169, B=169]	1	4		18.7003	19.2751	18.8594	19.4719	19.3614	19.8697	19.7829	19.7944	19.4519	20.3196	19.943	19.6101
P07437;P68371;Q13885;Q9BVA1;Q9H4B7	A6NNZ2;P07437;P68371;Q13885;Q3ZCM7;Q9BVA1;Q9H4B7	TBB1_HUMAN;TBB2A_HUMAN;TBB2B_HUMAN;TBB4B_HUMAN;TBB5_HUMAN	TUBB;TUBB1;TUBB2A;TUBB2B;TUBB4B	Tubulin beta chain	Color2 [A=255, R=169, G=169, B=169]	1	4		16.954	17.1565	17.301	17.1558	17.562	17.5702	17.408	17.6491	17.2101	17.9907	18.0433	17.947
P07437;Q13509;Q13885;Q9BVA1	P07437;Q13509;Q13885;Q9BVA1	TBB2A_HUMAN;TBB2B_HUMAN;TBB3_HUMAN;TBB5_HUMAN	TUBB;TUBB2A;TUBB2B;TUBB3	Tubulin beta chain	Color2 [A=255, R=169, G=169, B=169]	1	4		20.6173	20.3822	20.8779	20.5946	21.1371	21.3556	21.1068	20.9638	21.0051	21.6102	21.7658	21.8784
P07476	P07476	INVO_HUMAN	IVL	Involucrin	Color2 [A=255, R=169, G=169, B=169]	1	4		9.62629	10.7852	11.2862	13.3819	11.8401	11.7422	11.6088	9.85134	12.2322	12.4459	12.7599	11.9284
P07477;P07478;Q8NHM4	P07477;P07478;Q8NHM4	TRY1_HUMAN;TRY2_HUMAN;TRY6_HUMAN	PRSS1;PRSS2;PRSS3P2	Serine protease 1	Color2 [A=255, R=169, G=169, B=169]	1	4		15.4755	15.8058	15.2266	15.5673	16.2366	16.0261	15.7847	15.9761	16.5091	15.0865	14.5327	14.6413
P07585	P07585	PGS2_HUMAN	DCN	Decorin	Color2 [A=255, R=169, G=169, B=169]	1	4		13.9742	13.9889	13.4819	12.9747	14.4253	15.1168	15.4544	15.028	14.059	13.6	13.9063	13.5559
P07602	P07602	SAP_HUMAN	PSAP	Prosaposin	Color2 [A=255, R=169, G=169, B=169]	1	4		14.9467	14.3485	9.96629	14.8676	16.3191	15.3533	15.6662	14.2391	14.7349	15.2112	14.456	14.9917
P07686	P07686	HEXB_HUMAN	HEXB	Beta-hexosaminidase subunit beta	Color2 [A=255, R=169, G=169, B=169]	1	4		13.0753	14.5224	13.7161	15.0587	14.1223	14.0246	13.6284	13.3962	12.3076	14.0118	14.0514	13.4912
P07737	P07737	PROF1_HUMAN	PFN1	Profilin-1	Color2 [A=255, R=169, G=169, B=169]	1	4		16.0415	16.4729	16.7157	16.6589	16.5015	16.9463	16.8196	16.7422	16.6709	17.2904	17.663	18.0455
P07741	P07741	APT_HUMAN	APRT	Adenine phosphoribosyltransferase	Color2 [A=255, R=169, G=169, B=169]	1	4		16.013	16.2401	16.0398	16.8651	16.999	17.5016	17.4802	17.3551	16.9716	17.7546	17.8701	18.3343
P07814	P07814	SYEP_HUMAN	EPRS1	Bifunctional glutamate/proline--tRNA ligase	Color2 [A=255, R=169, G=169, B=169]	1	4		18.5196	18.5927	18.4859	18.531	18.8132	18.8885	18.874	18.9518	19.0019	18.8799	18.8732	18.7467
P07814;P47897	P07814;P47897	SYEP_HUMAN;SYQ_HUMAN	EPRS1;QARS1	Bifunctional glutamate/proline--tRNA ligase	Color2 [A=255, R=169, G=169, B=169]	1	4		13.6271	13.6638	13.3072	10.2168	14.5419	14.3166	14.1806	14.1577	14.0432	14.5941	14.6599	14.44
P07858	P07858	CATB_HUMAN	CTSB	Cathepsin B	Color2 [A=255, R=169, G=169, B=169]	1	4		16.0811	17.1667	16.4715	17.3922	17.8476	17.6257	17.6698	17.343	17.5251	17.6685	18.1376	17.5748
P07900	P07900	HS90A_HUMAN	HSP90AA1	Heat shock protein HSP 90-alpha	Color2 [A=255, R=169, G=169, B=169]	1	4		17.2719	17.5014	17.7022	17.5958	17.856	17.6405	17.8423	17.9419	17.5522	18.1667	18.297	18.3457
P07900;P08238	P07900;P08238;Q58FF7;Q58FF8	HS90A_HUMAN;HS90B_HUMAN	HSP90AA1;HSP90AB1	Heat shock protein HSP 90-alpha	Color2 [A=255, R=169, G=169, B=169]	1	4		18.221	18.9482	18.6052	18.6838	18.6205	18.3058	18.9759	18.9882	18.7419	19.0802	19.3696	19.4664
P07900;P08238;Q14568	P07900;P08238;Q14568;Q58FF8	HS902_HUMAN;HS90A_HUMAN;HS90B_HUMAN	HSP90AA1;HSP90AA2P;HSP90AB1	Heat shock protein HSP 90-alpha	Color2 [A=255, R=169, G=169, B=169]	1	4		19.126	18.9228	19.0436	19.0825	19.2851	19.1107	19.4623	19.1797	18.5655	19.2114	19.3552	19.7144
P07900;Q14568	P07900;Q14568	HS902_HUMAN;HS90A_HUMAN	HSP90AA1;HSP90AA2P	Heat shock protein HSP 90-alpha	Color2 [A=255, R=169, G=169, B=169]	1	4		11.891	14.1153	14.563	13.4637	12.9029	13.3687	14.4322	14.6307	14.0251	14.8238	14.9246	14.699
P07910	P07910	HNRPC_HUMAN	HNRNPC	Heterogeneous nuclear ribonucleoproteins C1/C2	Color2 [A=255, R=169, G=169, B=169]	1	4		22.0501	22.2226	22.2236	22.4011	21.9045	21.6841	22.1015	21.7672	21.7148	22.3802	22.1343	22.0165
P07910;Q86SE5	P07910;Q86SE5	HNRPC_HUMAN;RALYL_HUMAN	HNRNPC;RALYL	Heterogeneous nuclear ribonucleoproteins C1/C2	Color2 [A=255, R=169, G=169, B=169]	1	4		18.6148	18.9769	18.7221	18.8442	17.95	18.0438	18.9163	18.0092	18.1687	18.063	17.8044	17.1779
P07919	P07919	QCR6_HUMAN	UQCRH	Cytochrome b-c1 complex subunit 6, mitochondrial	Color2 [A=255, R=169, G=169, B=169]	1	4		18.7062	18.7287	18.4183	18.8322	19.2093	18.5971	19.2798	19.0843	19.0173	19.2099	19.1897	19.1897
P07942	P07942	LAMB1_HUMAN	LAMB1	Laminin subunit beta-1	Color2 [A=255, R=169, G=169, B=169]	1	4		17.18	17.4302	17.1546	17.3869	18.1537	18.15	18.2609	18.3044	17.8812	18.5193	18.5446	18.4781
P07947	P07947	YES_HUMAN	YES1	Tyrosine-protein kinase Yes	Color2 [A=255, R=169, G=169, B=169]	1	4		17.6985	18.047	17.983	18.1989	18.4973	18.6471	18.3903	18.6321	18.3491	18.7114	18.7482	18.6469
P07947;P07948;P12931	P07947;P07948;P08631;P12931	LYN_HUMAN;SRC_HUMAN;YES_HUMAN	LYN;SRC;YES1	Tyrosine-protein kinase Yes	Color2 [A=255, R=169, G=169, B=169]	1	4		16.5769	16.9348	16.8278	16.9014	17.6921	17.4809	17.5123	17.596	17.0488	17.7959	17.6261	17.2085
P07947;P12931	P07947;P12931	SRC_HUMAN;YES_HUMAN	SRC;YES1	Tyrosine-protein kinase Yes	Color2 [A=255, R=169, G=169, B=169]	1	4		17.0783	17.9877	16.8797	17.652	18.1299	18.4215	18.0953	18.5153	17.5452	18.4034	18.1832	17.6822
P07948	P07948	LYN_HUMAN	LYN	Tyrosine-protein kinase Lyn	Color2 [A=255, R=169, G=169, B=169]	1	4		17.6041	17.8528	17.9199	17.8863	18.1052	18.3757	18.3276	18.265	17.7671	18.3617	18.2415	18.2775
P07951;P67936	P07951;P67936	TPM2_HUMAN;TPM4_HUMAN	TPM2;TPM4	Tropomyosin beta chain	Color2 [A=255, R=169, G=169, B=169]	1	4		12.3898	10.7918	12.1997	12.4308	13.799	13.5993	13.7318	13.2694	13.8295	14.6224	14.2491	14.928
P07954	P07954	FUMH_HUMAN	FH	Fumarate hydratase, mitochondrial	Color2 [A=255, R=169, G=169, B=169]	1	4		19.7021	19.5538	19.6413	19.6539	19.6001	19.255	19.3737	19.3292	19.4926	19.0559	19.0297	19.0605
P07992	P07992	ERCC1_HUMAN	ERCC1	DNA excision repair protein ERCC-1	Color2 [A=255, R=169, G=169, B=169]	1	4		12.2275	13.2906	13.6298	13.4087	12.8605	14.1508	13.9823	13.7126	13.2013	14.2793	13.6981	14.3496
P08047	P08047	SP1_HUMAN	SP1	Transcription factor Sp1	Color2 [A=255, R=169, G=169, B=169]	1	4		15.0608	15.6642	15.7466	15.798	15.9868	16.4534	16.3261	16.2257	16.6828	17.0065	17.0253	17.5071
P08069	P08069	IGF1R_HUMAN	IGF1R	Insulin-like growth factor 1 receptor	Color2 [A=255, R=169, G=169, B=169]	1	4		15.5487	15.8544	15.8022	16.1377	16.6214	16.6717	16.497	16.6477	16.8551	17.251	17.0614	16.8401
P08123	P08123	CO1A2_HUMAN	COL1A2	Collagen alpha-2(I) chain	Color2 [A=255, R=169, G=169, B=169]	1	4		13.623	10.6944	11.7622	13.209	13.5519	11.4184	12.5675	11.2054	10.378	11.6147	13.5915	10.5756
P08133	P08133	ANXA6_HUMAN	ANXA6	Annexin A6	Color2 [A=255, R=169, G=169, B=169]	1	4		13.6201	14.3628	13.9161	14.1874	14.6877	14.201	14.5272	15.0461	14.4338	15.3105	15.4097	15.6017
P08134	P08134	RHOC_HUMAN	RHOC	Rho-related GTP-binding protein RhoC	Color2 [A=255, R=169, G=169, B=169]	1	4		17.1282	17.7916	18.0258	18.0621	18.1888	17.7073	18.7262	17.8852	18.3143	18.0459	17.906	18.0346
P08134;P61586	P08134;P61586	RHOA_HUMAN;RHOC_HUMAN	RHOA;RHOC	Rho-related GTP-binding protein RhoC	Color2 [A=255, R=169, G=169, B=169]	1	4		21.4935	21.2595	21.3935	21.656	21.7897	21.7515	21.8502	21.6879	21.7016	21.8673	21.8757	21.8577
P08134;P61586;P62745	P08134;P61586;P62745	RHOA_HUMAN;RHOB_HUMAN;RHOC_HUMAN	RHOA;RHOB;RHOC	Rho-related GTP-binding protein RhoC	Color2 [A=255, R=169, G=169, B=169]	1	4		21.1232	20.7125	20.9802	20.2432	21.5368	20.6823	20.4706	21.3604	20.9949	20.7258	21.1792	20.7921
P08138	P08138	TNR16_HUMAN	NGFR	Tumor necrosis factor receptor superfamily member 16	Color2 [A=255, R=169, G=169, B=169]	1	4		12.7376	13.515	13.7558	13.0996	14.3713	14.0462	13.7345	14.5359	15.1482	14.7822	14.6222	15.3081
P08151;P10070;P10071;Q8NBF1;Q9BZE0	P08151;P10070;P10071;Q8NBF1;Q8NEA6;Q9BZE0	GLI1_HUMAN;GLI2_HUMAN;GLI3_HUMAN;GLIS1_HUMAN;GLIS2_HUMAN	GLI1;GLI2;GLI3;GLIS1;GLIS2	Zinc finger protein GLI1	Color2 [A=255, R=169, G=169, B=169]	1	4		12.6596	11.0877	12.5261	11.5499	14.2051	13.8833	14.2164	12.6739	13.9588	15.319	15.4959	15.3712
P08183	P08183	MDR1_HUMAN	ABCB1	ATP-dependent translocase ABCB1	Color2 [A=255, R=169, G=169, B=169]	1	4		10.9741	11.3199	10.8443	11.1235	13.798	13.384	13.6969	13.7855	14.8676	15.0356	15.3922	14.9908
P08195	P08195	4F2_HUMAN	SLC3A2	4F2 cell-surface antigen heavy chain	Color2 [A=255, R=169, G=169, B=169]	1	4		20.2406	20.637	20.5184	20.5784	20.3714	20.3969	20.4932	20.485	20.4367	20.6478	20.6666	20.5851
P08235	P08235	MCR_HUMAN	NR3C2	Mineralocorticoid receptor	Color2 [A=255, R=169, G=169, B=169]	1	4		12.6139	12.3936	11.273	10.3936	11.6162	13.2995	12.4956	13.0868	10.0944	13.2379	13.0171	13.0146
P08236	P08236	BGLR_HUMAN	GUSB	Beta-glucuronidase	Color2 [A=255, R=169, G=169, B=169]	1	4		16.291	16.4593	16.119	16.1814	16.5435	16.8544	17.0462	16.7823	16.2457	17.2244	17.1288	16.8789
P08237	P08237	PFKAM_HUMAN	PFKM	ATP-dependent 6-phosphofructokinase, muscle type	Color2 [A=255, R=169, G=169, B=169]	1	4		18.2476	18.4393	18.4289	18.4317	19.2869	19.1266	19.236	19.1812	18.7822	18.9669	18.9799	18.8887
P08237;P17858	P08237;P17858	PFKAL_HUMAN;PFKAM_HUMAN	PFKL;PFKM	ATP-dependent 6-phosphofructokinase, muscle type	Color2 [A=255, R=169, G=169, B=169]	1	4		14.5708	15.4975	14.5197	10.8046	12.357	12.8163	15.2431	13.7358	11.296	11.0146	13.1111	13.9282
P08237;P17858;Q01813	P08237;P17858;Q01813	PFKAL_HUMAN;PFKAM_HUMAN;PFKAP_HUMAN	PFKL;PFKM;PFKP	ATP-dependent 6-phosphofructokinase, muscle type	Color2 [A=255, R=169, G=169, B=169]	1	4		17.4795	17.1229	17.5305	17.7052	18.1413	18.287	18.2564	17.529	17.7857	18.0538	17.5569	17.6997
P08238	P08238	HS90B_HUMAN	HSP90AB1	Heat shock protein HSP 90-beta	Color2 [A=255, R=169, G=169, B=169]	1	4		19.026	18.9043	19.3157	19.1663	19.1287	19.3063	19.1972	19.317	19.1787	19.7753	19.9265	20.3496
P08238;P14625	P08238;P14625	ENPL_HUMAN;HS90B_HUMAN	HSP90AB1;HSP90B1	Heat shock protein HSP 90-beta	Color2 [A=255, R=169, G=169, B=169]	1	4		18.7682	19.0621	19.0211	19.203	20.5824	20.2204	21.1098	20.6192	19.5748	22.0072	22.0033	22.2357
P08240	P08240	SRPRA_HUMAN	SRPRA	Signal recognition particle receptor subunit alpha	Color2 [A=255, R=169, G=169, B=169]	1	4		19.8839	20.1067	20.0695	20.0198	20.0396	20.1392	20.1252	20.1537	20.1475	20.1428	20.1152	19.9827
P08243	P08243	ASNS_HUMAN	ASNS	Asparagine synthetase [glutamine-hydrolyzing]	Color2 [A=255, R=169, G=169, B=169]	1	4		16.2842	16.5829	16.5643	16.6208	16.0399	16.4858	16.6266	16.6731	16.4749	17.1407	17.3425	17.8552
P08247	P08247	SYPH_HUMAN	SYP	Synaptophysin	Color2 [A=255, R=169, G=169, B=169]	1	4		18.4193	18.8042	17.9923	18.8044	18.27	18.6528	18.7795	18.6913	18.4731	18.6423	18.469	17.5618
P08319	P08319	ADH4_HUMAN	ADH4	All-trans-retinol dehydrogenase [NAD(+)] ADH4	Color2 [A=255, R=169, G=169, B=169]	1	4		15.4083	15.8734	15.6588	15.2506	15.5596	13.3787	15.4966	14.2136	15.5161	14.9771	14.1305	12.1576
P08493	P08493	MGP_HUMAN	MGP	Matrix Gla protein	Color2 [A=255, R=169, G=169, B=169]	1	4		14.5058	15.4882	13.7953	15.2043	11.362	14.5143	14.3765	14.3437	11.5861	14.6314	14.3097	14.093
P08559	P08559;P29803	ODPA_HUMAN	PDHA1	Pyruvate dehydrogenase E1 component subunit alpha, somatic form, mitochondrial	Color2 [A=255, R=169, G=169, B=169]	1	4		23.3156	22.9188	23.0098	22.9879	23.141	23.0286	23.1096	23.0527	23.1562	22.7594	22.6019	22.5626
P08567	P08567	PLEK_HUMAN	PLEK	Pleckstrin	Color2 [A=255, R=169, G=169, B=169]	1	4		10.6696	10.7739	11.9097	11.0565	14.0157	13.7468	13.6743	14.5718	10.3459	13.0832	14.0537	14.6957
P08574	P08574	CY1_HUMAN	CYC1	Cytochrome c1, heme protein, mitochondrial	Color2 [A=255, R=169, G=169, B=169]	1	4		20.897	20.8411	20.3525	20.7943	20.8877	20.7257	20.9744	20.9362	20.4124	20.5282	20.5258	20.3451
P08579	P08579	RU2B_HUMAN	SNRPB2	U2 small nuclear ribonucleoprotein B''	Color2 [A=255, R=169, G=169, B=169]	1	4		14.6732	15.1278	14.5134	15.4569	14.9246	14.873	15.1549	14.6567	14.3371	14.9732	13.8602	14.8392
P08579;P09012	P08579;P09012	RU2B_HUMAN;SNRPA_HUMAN	SNRPA;SNRPB2	U2 small nuclear ribonucleoprotein B''	Color2 [A=255, R=169, G=169, B=169]	1	4		14.7415	15.3323	15.495	15.233	15.5153	15.3521	14.3929	15.2076	15.1492	15.3075	15.3261	15.5033
P08581	P08581	MET_HUMAN	MET	Hepatocyte growth factor receptor	Color2 [A=255, R=169, G=169, B=169]	1	4		15.2577	15.7645	15.6752	15.8935	16.064	16.0915	15.877	16.2501	15.979	16.3862	16.2066	16.3655
P08581;P12931;P42685;Q04912	P08581;P12931;P42685;Q04912;Q9H3Y6	FRK_HUMAN;MET_HUMAN;RON_HUMAN;SRC_HUMAN	FRK;MET;MST1R;SRC	Hepatocyte growth factor receptor	Color2 [A=255, R=169, G=169, B=169]	1	4		15.76	14.0779	15.463	14.968	15.4958	16.5759	16.2292	16.1937	15.5332	15.8424	15.9169	15.7947
P08590	P05976;P08590	MYL3_HUMAN	MYL3	Myosin light chain 3	Color2 [A=255, R=169, G=169, B=169]	1	4		15.298	15.4795	16.344	15.2318	16.3393	10.8096	11.0084	16.5642	16.7185	17.0954	17.0656	11.798
P08621	P08621	RU17_HUMAN	SNRNP70	U1 small nuclear ribonucleoprotein 70 kDa	Color2 [A=255, R=169, G=169, B=169]	1	4		18.6955	18.7801	18.863	18.8855	18.6759	18.5075	18.6501	18.3207	18.768	19.0331	19.1135	18.9268
P08651	P08651	NFIC_HUMAN	NFIC	Nuclear factor 1 C-type	Color2 [A=255, R=169, G=169, B=169]	1	4		17.8591	18.5516	18.6594	18.2525	17.7549	18.4065	18.0688	18.0397	17.599	18.2292	18.3552	18.1347
P08651;Q12857	P08651;Q12857	NFIA_HUMAN;NFIC_HUMAN	NFIA;NFIC	Nuclear factor 1 C-type	Color2 [A=255, R=169, G=169, B=169]	1	4		14.208	15.582	15.4837	14.697	13.8901	11.7645	14.9488	14.2961	13.2392	13.8146	12.7476	10.1932
P08670	P08670	VIME_HUMAN	VIM	Vimentin	Color2 [A=255, R=169, G=169, B=169]	1	4		24.8605	24.7533	24.7968	24.5188	24.3654	24.3577	24.2211	24.1334	24.6017	24.3164	24.2255	24.0437
P08670;P17661	P08670;P17661	DESM_HUMAN;VIME_HUMAN	DES;VIM	Vimentin	Color2 [A=255, R=169, G=169, B=169]	1	4		22.7583	22.6243	22.4524	22.7404	22.604	22.3972	22.4338	22.2928	22.6677	22.4935	22.467	22.3963
P08670;P17661;Q16352	P07197;P08670;P17661;Q16352	AINX_HUMAN;DESM_HUMAN;VIME_HUMAN	DES;INA;VIM	Vimentin	Color2 [A=255, R=169, G=169, B=169]	1	4		20.0891	19.7528	20.0178	18.8838	18.4999	18.8143	17.9992	18.0187	18.8857	18.9225	19.0648	18.7628
P08670;P41219	P08670;P41219	PERI_HUMAN;VIME_HUMAN	PRPH;VIM	Vimentin	Color2 [A=255, R=169, G=169, B=169]	1	4		23.2676	22.9483	23.0276	22.7556	22.3812	22.5177	22.4473	22.3437	22.7777	22.6339	22.5085	22.2029
P08708	P08708	RS17_HUMAN	RPS17	40S ribosomal protein S17	Color2 [A=255, R=169, G=169, B=169]	1	4		18.8293	18.8571	19.0877	18.9196	19.1154	19.2246	18.9667	19.0555	19.5378	19.3727	19.352	19.4093
P08727	P08727	K1C19_HUMAN	KRT19	Keratin, type I cytoskeletal 19	Color2 [A=255, R=169, G=169, B=169]	1	4		16.8307	16.8211	16.6182	17.3455	14.1216	14.1083	19.4549	9.75053	18.7236	13.7143	19.2517	18.2253
P08727;P08779	P08727;P08779	K1C16_HUMAN;K1C19_HUMAN	KRT16;KRT19	Keratin, type I cytoskeletal 19	Color2 [A=255, R=169, G=169, B=169]	1	4		12.5678	9.85248	12.4866	14.4849	10.4515	12.3304	13.2055	11.3488	11.1025	9.71885	11.8273	12.4776
P08727;P13646	P08727;P13646	K1C13_HUMAN;K1C19_HUMAN	KRT13;KRT19	Keratin, type I cytoskeletal 19	Color2 [A=255, R=169, G=169, B=169]	1	4		19.1436	16.0385	16.0752	14.0866	11.3373	12.1108	15.0961	10.7222	12.9112	11.598	10.9715	11.2187
P08727;Q04695	P08727;Q04695	K1C17_HUMAN;K1C19_HUMAN	KRT17;KRT19	Keratin, type I cytoskeletal 19	Color2 [A=255, R=169, G=169, B=169]	1	4		15.2512	15.2487	16.6368	15.0868	15.2288	14.6029	16.7563	15.7606	15.4471	14.0676	12.6132	14.3824
P08754	P08754	GNAI3_HUMAN	GNAI3	Guanine nucleotide-binding protein G(i) subunit alpha-3	Color2 [A=255, R=169, G=169, B=169]	1	4		21.158	21.3718	21.5276	21.2494	21.3366	21.3826	21.2773	21.3157	21.4989	21.4719	21.3896	21.3711
P08758	P08758	ANXA5_HUMAN	ANXA5	Annexin A5	Color2 [A=255, R=169, G=169, B=169]	1	4		12.5597	13.0267	13.6311	13.2028	13.7888	13.1934	13.5657	11.7236	13.5666	13.3803	14.4076	14.4535
P08779	P08779	K1C16_HUMAN	KRT16	Keratin, type I cytoskeletal 16	Color2 [A=255, R=169, G=169, B=169]	1	4		20.2269	19.7812	20.6172	23.1075	19.9518	19.5344	20.4941	19.5206	19.7935	18.5126	18.8356	18.587
P08842	P08842	STS_HUMAN	STS	Steryl-sulfatase	Color2 [A=255, R=169, G=169, B=169]	1	4		12.0133	13.6362	13.9368	14.3384	13.0059	12.9248	12.4498	12.5596	10.5353	12.511	13.6157	13.4761
P08865	P08865	RSSA_HUMAN	RPSA	40S ribosomal protein SA	Color2 [A=255, R=169, G=169, B=169]	1	4		16.5993	16.7031	16.9912	17.1888	17.3118	17.3165	17.6301	17.6251	17.4441	17.853	18.043	18.4853
P08949	P08949	NMB_HUMAN	NMB	Neuromedin-B	Color2 [A=255, R=169, G=169, B=169]	1	4		10.0806	9.84709	11.3134	7.08151	10.3664	12.4753	11.3737	12.6731	11.9456	11.1328	12.7706	11.806
P09001	P09001	RM03_HUMAN	MRPL3	39S ribosomal protein L3, mitochondrial	Color2 [A=255, R=169, G=169, B=169]	1	4		19.8647	19.7218	19.7088	19.8137	19.8304	19.6223	19.8207	19.8169	19.8355	19.517	19.4556	19.2967
P09012	P09012	SNRPA_HUMAN	SNRPA	U1 small nuclear ribonucleoprotein A	Color2 [A=255, R=169, G=169, B=169]	1	4		16.8668	14.8005	13.6287	14.6316	11.688	11.3883	11.382	10.4379	11.107	10.5473	10.2605	10.813
P09016	P09016	HXD4_HUMAN	HOXD4	Homeobox protein Hox-D4	Color2 [A=255, R=169, G=169, B=169]	1	4		12.3099	12.4148	12.6605	12.1481	13.0927	12.8559	12.979	12.5745	12.3178	13.4178	13.2317	12.5081
P09016;Q00056	P09016;Q00056	HXA4_HUMAN;HXD4_HUMAN	HOXA4;HOXD4	Homeobox protein Hox-D4	Color2 [A=255, R=169, G=169, B=169]	1	4		14.7811	14.9689	15.3637	14.6691	14.325	15.1967	14.998	14.6709	13.9737	15.3142	15.4811	15.4154
P09017	P09017	HXC4_HUMAN	HOXC4	Homeobox protein Hox-C4	Color2 [A=255, R=169, G=169, B=169]	1	4		10.8781	11.0442	13.332	10.997	8.38112	11.9491	11.0591	11.0972	10.0421	10.3436	11.0793	10.0982
P09017;P17483	P09017;P17483	HXB4_HUMAN;HXC4_HUMAN	HOXB4;HOXC4	Homeobox protein Hox-C4	Color2 [A=255, R=169, G=169, B=169]	1	4		13.7506	14.6357	14.0726	14.2099	14.9006	14.4713	14.9602	13.8855	14.3585	14.8929	14.6727	14.485
P09038	P09038	FGF2_HUMAN	FGF2	Fibroblast growth factor 2	Color2 [A=255, R=169, G=169, B=169]	1	4		12.8741	13.7775	13.4529	13.692	12.5745	13.5292	11.6245	12.7616	12.4664	13.9874	14.3319	14.1229
P09110	P09110	THIK_HUMAN	ACAA1	3-ketoacyl-CoA thiolase, peroxisomal	Color2 [A=255, R=169, G=169, B=169]	1	4		16.3704	16.2374	16.393	16.4795	18.4902	18.6789	18.6328	18.0226	17.2695	19.5229	19.5723	19.8305
P09132	P09132	SRP19_HUMAN	SRP19	Signal recognition particle 19 kDa protein	Color2 [A=255, R=169, G=169, B=169]	1	4		13.4627	12.436	13.4368	13.4674	13.0872	13.5651	13.3111	13.3097	13.4331	13.9419	14.1947	13.9748
P09211	P09211	GSTP1_HUMAN	GSTP1	Glutathione S-transferase P	Color2 [A=255, R=169, G=169, B=169]	1	4		13.6795	14.3098	14.0221	16.0704	14.05	13.6317	14.9425	14.5181	15.0944	14.7504	15.7029	15.4499
P09234	P09234	RU1C_HUMAN	SNRPC	U1 small nuclear ribonucleoprotein C	Color2 [A=255, R=169, G=169, B=169]	1	4		15.0692	15.6328	15.3388	15.7749	15.6643	15.2244	15.3508	15.2154	15.8098	15.9028	15.7286	15.6211
P09382	P09382	LEG1_HUMAN	LGALS1	Galectin-1	Color2 [A=255, R=169, G=169, B=169]	1	4		12.3905	13.0893	13.9059	13.5632	14.1518	14.3184	13.8235	14.0995	14.3656	15.1517	15.1205	15.3506
P09417	P09417	DHPR_HUMAN	QDPR	Dihydropteridine reductase	Color2 [A=255, R=169, G=169, B=169]	1	4		16.122	15.6976	15.8817	16.3984	16.2476	15.7457	16.2852	16.1827	16.6072	15.8719	16.0886	16.3254
P09429	P09429;B2RPK0	HMGB1_HUMAN	HMGB1	High mobility group protein B1	Color2 [A=255, R=169, G=169, B=169]	1	4		14.7889	15.4325	15.3153	15.4748	16.5466	16.1778	15.9175	16.6829	16.6944	16.8582	17.3858	17.5513
P09429;P26583	P09429;P26583	HMGB1_HUMAN;HMGB2_HUMAN	HMGB1;HMGB2	High mobility group protein B1	Color2 [A=255, R=169, G=169, B=169]	1	4		13.9897	13.7372	13.5099	13.2242	13.8995	14.2865	14.5618	14.2534	15.1926	15.4176	16.5362	16.7136
P09471	P09471	GNAO_HUMAN	GNAO1	Guanine nucleotide-binding protein G(o) subunit alpha	Color2 [A=255, R=169, G=169, B=169]	1	4		21.6844	21.9206	21.9088	21.7742	21.6747	21.8301	21.7802	21.8952	21.643	21.7266	21.7127	21.5086
P09486	P09486	SPRC_HUMAN	SPARC	SPARC	Color2 [A=255, R=169, G=169, B=169]	1	4		11.004	12.4637	11.5952	12.6029	12.5907	13.6439	13.7805	13.3825	12.9814	13.9774	13.3901	14.1385
P09496	P09496	CLCA_HUMAN	CLTA	Clathrin light chain A	Color2 [A=255, R=169, G=169, B=169]	1	4		15.5632	15.5916	16.4626	16.1217	17.2677	17.2271	16.949	16.9459	17.7505	18.2273	18.4174	18.3
P09497	P09497	CLCB_HUMAN	CLTB	Clathrin light chain B	Color2 [A=255, R=169, G=169, B=169]	1	4		10.9074	10.1794	11.3887	11.7405	12.3547	14.0674	14.8487	12.7721	13.8545	14.3292	14.5401	13.5256
P09525	P09525	ANXA4_HUMAN	ANXA4	Annexin A4	Color2 [A=255, R=169, G=169, B=169]	1	4		9.88479	13.097	12.8499	14.3955	13.5208	12.0198	14.0091	9.78184	12.8133	12.5606	12.8557	13.7995
P09543	P09543	CN37_HUMAN	CNP	2',3'-cyclic-nucleotide 3'-phosphodiesterase	Color2 [A=255, R=169, G=169, B=169]	1	4		19.7509	19.4227	19.4438	19.586	19.3443	19.1956	19.3299	19.2096	19.4632	19.3724	19.3271	19.313
P09622	P09622	DLDH_HUMAN	DLD	Dihydrolipoyl dehydrogenase, mitochondrial	Color2 [A=255, R=169, G=169, B=169]	1	4		21.5237	20.9656	21.291	21.1983	21.0812	20.746	20.8484	20.8865	20.9587	20.5555	20.3835	20.3623
P09629	P09629	HXB7_HUMAN	HOXB7	Homeobox protein Hox-B7	Color2 [A=255, R=169, G=169, B=169]	1	4		9.76134	9.93941	11.9873	10.1701	13.4137	13.3095	14.1125	13.7015	12.4746	14.1865	14.068	13.6325
P09629;P17509	P09629;P17509	HXB6_HUMAN;HXB7_HUMAN	HOXB6;HOXB7	Homeobox protein Hox-B7	Color2 [A=255, R=169, G=169, B=169]	1	4		10.43	12.4259	14.9799	12.5358	14.4966	10.1434	13.0686	12.1283	13.9104	13.5962	13.6691	13.5643
P09630	P09630	HXC6_HUMAN	HOXC6	Homeobox protein Hox-C6	Color2 [A=255, R=169, G=169, B=169]	1	4		10.5062	11.9892	12.3399	10.8039	11.4854	10.691	10.5264	10.8017	12.753	10.92	12.0461	11.4499
P09630;Q00444	P09067;P20719;P31268;Q00444;P09630;P31267	HXC5_HUMAN;HXC6_HUMAN	HOXC5;HOXC6	Homeobox protein Hox-C6	Color2 [A=255, R=169, G=169, B=169]	1	4		11.5552	13.4552	12.9502	13.8539	12.4212	12.6064	13.4794	12.0463	12.7378	13.1128	13.3912	12.1505
P09651	P09651;A0A2R8Y4L2	ROA1_HUMAN	HNRNPA1	Heterogeneous nuclear ribonucleoprotein A1	Color2 [A=255, R=169, G=169, B=169]	1	4		21.4131	21.585	21.3253	21.4095	20.9123	20.277	20.6612	20.557	20.6206	20.888	21.0295	20.5379
P09651;P22626;Q32P51	P09651;P22626;Q32P51;A0A2R8Y4L2	RA1L2_HUMAN;ROA1_HUMAN;ROA2_HUMAN	HNRNPA1;HNRNPA1L2;HNRNPA2B1	Heterogeneous nuclear ribonucleoprotein A1	Color2 [A=255, R=169, G=169, B=169]	1	4		10.3924	16.7848	16.4067	17.8786	10.5492	13.3645	15.8245	11.7142	10.2298	12.1122	11.6135	11.8846
P09651;P51991	P09651;P51991;Q32P51;A0A2R8Y4L2	ROA1_HUMAN;ROA3_HUMAN	HNRNPA1;HNRNPA3	Heterogeneous nuclear ribonucleoprotein A1	Color2 [A=255, R=169, G=169, B=169]	1	4		17.6671	17.7629	17.3093	18.3595	17.4866	16.8282	17.0929	17.5043	17.1677	17.7631	17.8411	17.6219
P09651;P51991;Q32P51	P09651;P51991;Q32P51	RA1L2_HUMAN;ROA1_HUMAN;ROA3_HUMAN	HNRNPA1;HNRNPA1L2;HNRNPA3	Heterogeneous nuclear ribonucleoprotein A1	Color2 [A=255, R=169, G=169, B=169]	1	4		14.5378	15.2812	14.798	15.5532	14.7075	14.4209	13.7425	13.6054	13.9534	15.0744	14.9278	14.805
P09651;Q32P51	P09651;Q32P51	RA1L2_HUMAN;ROA1_HUMAN	HNRNPA1;HNRNPA1L2	Heterogeneous nuclear ribonucleoprotein A1	Color2 [A=255, R=169, G=169, B=169]	1	4		20.295	20.4328	20.1543	20.5972	20.233	19.1665	19.7452	19.6236	19.7599	19.9239	20.3545	19.939
P09661	P09661	RU2A_HUMAN	SNRPA1	U2 small nuclear ribonucleoprotein A'	Color2 [A=255, R=169, G=169, B=169]	1	4		19.0543	19.1553	19.1192	18.9262	19.034	18.9238	18.9369	18.6197	18.8728	18.9755	18.9717	18.9846
P09668	P09668	CATH_HUMAN	CTSH	Pro-cathepsin H	Color2 [A=255, R=169, G=169, B=169]	1	4		17.4451	17.0749	17.0522	16.9531	18.8227	18.6561	18.9527	18.7863	18.4554	18.3666	17.8874	17.9525
P09669	P09669	COX6C_HUMAN	COX6C	Cytochrome c oxidase subunit 6C	Color2 [A=255, R=169, G=169, B=169]	1	4		18.4861	18.0672	17.6126	18.4674	17.9199	17.7863	17.9798	18.705	17.9732	17.8438	17.9932	17.856
P09848	P09848	LPH_HUMAN	LCT	Lactase/phlorizin hydrolase	Color2 [A=255, R=169, G=169, B=169]	1	4		15.5186	15.388	14.7543	14.5971	15.3483	15.407	15.4633	15.3733	14.9735	15.3767	14.9544	13.7509
P09874	P09874	PARP1_HUMAN	PARP1	Poly [ADP-ribose] polymerase 1	Color2 [A=255, R=169, G=169, B=169]	1	4		21.0123	21.0821	21.2946	20.8614	21.2678	21.2993	21.4559	21.8401	21.3691	21.3459	21.6228	21.698
P09884	P09884	DPOLA_HUMAN	POLA1	DNA polymerase alpha catalytic subunit	Color2 [A=255, R=169, G=169, B=169]	1	4		14.506	15.5482	15.8289	15.2182	14.3296	15.686	15.2293	15.1123	14.9516	15.478	15.3957	15.4322
P09936	P09936	UCHL1_HUMAN	UCHL1	Ubiquitin carboxyl-terminal hydrolase isozyme L1	Color2 [A=255, R=169, G=169, B=169]	1	4		16.3779	16.4133	16.6385	16.7787	16.1925	16.769	16.8509	16.9701	17.0022	17.7144	18.037	18.322
P09972	P09972	ALDOC_HUMAN	ALDOC	Fructose-bisphosphate aldolase C	Color2 [A=255, R=169, G=169, B=169]	1	4		11.8703	10.8688	13.2704	10.4119	14.5004	12.83	11.4935	12.207	13.4071	14.2272	13.3085	12.5973
P0C0L4	P0C0L4;P0C0L5	CO4A_HUMAN	C4A	Complement C4-A	Color2 [A=255, R=169, G=169, B=169]	1	4		12.1828	9.01489	10.694	12.8259	12.2967	12.3935	11.8868	11.4956	11.8212	11.1748	13.2455	11.1953
P0C0S5;Q71UI9	P0C0S5;Q71UI9	H2AV_HUMAN;H2AZ_HUMAN	H2AZ1;H2AZ2	Histone H2A.Z	Color2 [A=255, R=169, G=169, B=169]	1	4		22.2325	21.4191	21.3639	21.1147	21.5954	21.088	21.5592	22.2508	21.8509	20.9156	21.404	21.7934
P0C0S8;P20671;Q16777;Q6FI13;Q96KK5;Q99878;Q9BTM1	P0C0S8;P20671;Q16777;Q6FI13;Q96KK5;Q99878;Q9BTM1	H2A1D_HUMAN;H2A1H_HUMAN;H2A1J_HUMAN;H2A1_HUMAN;H2A2A_HUMAN;H2A2C_HUMAN;H2AJ_HUMAN	H2AC12;H2AC14;H2AC17;H2AC19;H2AC20;H2AC7;H2AJ	Histone H2A type 1	Color2 [A=255, R=169, G=169, B=169]	1	4		23.5145	22.7369	23.0601	22.7134	22.99	22.5164	23.0375	23.5066	23.2754	22.9362	22.9637	23.3966
P0C1Z6	P0C1Z6	TFPT_HUMAN	TFPT	TCF3 fusion partner	Color2 [A=255, R=169, G=169, B=169]	1	4		13.5186	13.7848	12.5353	13.6867	14.1475	13.5695	13.6703	12.7682	14.1082	14.0356	13.6673	14.0259
P0C2W1	P0C2W1	FBSP1_HUMAN	FBXO45	F-box/SPRY domain-containing protein 1	Color2 [A=255, R=169, G=169, B=169]	1	4		13.8333	14.2681	13.9215	14.5275	14.6533	15.3103	15.0211	15.0462	14.4066	15.5687	15.4078	15.7632
P0C7H8;Q9BYR9;Q9BYT5;Q9BYU5	Q9BYR9;P0C7H8;Q9BYT5;Q9BYU5	KRA21_HUMAN;KRA22_HUMAN;KRA23_HUMAN;KRA24_HUMAN	KRTAP2-1;KRTAP2-2;KRTAP2-3;KRTAP2-4	Keratin-associated protein 2-3	Color2 [A=255, R=169, G=169, B=169]	1	4		13.0143	14.5655	16.831	17.087	15.785	12.1312	11.8354	12.4037	15.366	11.5649	11.5022	11.4261
P0C7P0	P0C7P0	CISD3_HUMAN	CISD3	CDGSH iron-sulfur domain-containing protein 3, mitochondrial	Color2 [A=255, R=169, G=169, B=169]	1	4		21.3984	20.9869	21.0004	21.2849	20.9853	20.75	20.7694	20.8806	21.2343	20.6985	20.5218	20.5079
P0C7T5	P0C7T5	ATX1L_HUMAN	ATXN1L	Ataxin-1-like	Color2 [A=255, R=169, G=169, B=169]	1	4		13.511	13.7017	13.0577	12.3619	11.3581	14.0075	13.9932	13.1521	14.0412	13.825	12.9722	13.6738
P0C860	P0C860	MS3L2_HUMAN	MSL3P1	Putative male-specific lethal-3 protein-like 2	Color2 [A=255, R=169, G=169, B=169]	1	4		12.5859	13.1127	14.5206	13.6795	12.5322	13.7022	12.5843	12.2152	10.0071	13.7631	13.3463	13.4117
P0C860;Q8N5Y2	Q8N5Y2;P0C860	MS3L1_HUMAN;MS3L2_HUMAN	MSL3;MSL3P1	Putative male-specific lethal-3 protein-like 2	Color2 [A=255, R=169, G=169, B=169]	1	4		10.4728	14.6542	15.3816	14.6473	13.8057	15.8444	15.7892	14.873	14.055	15.4348	15.483	15.6144
P0C869	P0C869	PA24B_HUMAN	PLA2G4B	Cytosolic phospholipase A2 beta	Color2 [A=255, R=169, G=169, B=169]	1	4		11.0671	12.975	14.6173	15.6381	12.0423	13.1013	15.2062	14.4307	13.4282	13.9443	15.4724	13.0439
P0CAP1	P0CAP1	MYZAP_HUMAN	MYZAP	Myocardial zonula adherens protein	Color2 [A=255, R=169, G=169, B=169]	1	4		10.8104	9.16121	11.1241	11.9712	10.4937	12.5799	13.1724	12.4386	12.8544	12.4261	12.5066	12.9924
P0CG13	P0CG13	CTF8_HUMAN	CHTF8	Chromosome transmission fidelity protein 8 homolog	Color2 [A=255, R=169, G=169, B=169]	1	4		13.5143	12.9714	14.7696	13.6101	14.8383	14.6777	14.0672	13.2892	13.3404	14.1007	14.1282	14.0727
P0CG24;P15622;P17032;P17036;P58317;Q5TYW1;Q86W11;Q8N883;Q8NF99;Q96NJ6;Q9HBT8	P15622;P17023;P17027;P17036;Q8NF99;Q9HBT8;Q9P0L1;P17032;P58317;Q5TYW1;Q86W11;Q8N883;Q5MCW4;Q6ZMS4;Q96NJ6;P0CG24;Q4V348	Z286A_HUMAN;ZFP3_HUMAN;ZN121_HUMAN;ZN250_HUMAN;ZN37A_HUMAN;ZN397_HUMAN;ZN614_HUMAN;ZN658_HUMAN;ZN883_HUMAN;ZNF3_HUMAN;ZSC30_HUMAN	ZFP3;ZNF121;ZNF250;ZNF286A;ZNF3;ZNF37A;ZNF397;ZNF614;ZNF658;ZNF883;ZSCAN30	Zinc finger protein 883	Color2 [A=255, R=169, G=169, B=169]	1	4		15.1176	15.5341	15.8845	15.649	15.2013	16.3341	15.8679	15.6593	15.0516	16.3372	16.4677	15.7986
P0CG24;P17014;P17025;Q06730;Q06732;Q6NX49;Q6ZMW2;Q6ZN57;Q8N184;Q8N883;Q9BX82;Q9BY31;Q9P2J8;Q9UJN7	P17014;Q06730;Q6ZN57;Q96NG5;P17025;Q06732;Q8N184;Q8N883;Q9BX82;Q9P2J8;Q6NX49;Q6ZMW2;Q9BY31;Q9HCZ1;Q9UJN7;P0CG24	ZFP2_HUMAN;ZN182_HUMAN;ZN33A_HUMAN;ZN33B_HUMAN;ZN391_HUMAN;ZN471_HUMAN;ZN544_HUMAN;ZN567_HUMAN;ZN614_HUMAN;ZN624_HUMAN;ZN717_HUMAN;ZN782_HUMAN;ZN883_HUMAN;ZNF12_HUMAN	ZFP2;ZNF12;ZNF182;ZNF33A;ZNF33B;ZNF391;ZNF471;ZNF544;ZNF567;ZNF614;ZNF624;ZNF717;ZNF782;ZNF883	Zinc finger protein 883	Color2 [A=255, R=169, G=169, B=169]	1	4		11.3247	9.84676	10.5933	8.08982	11.3847	11.1005	11.991	11.8206	10.7804	12.0159	11.3501	11.3589
P0CG24;P17014;P17025;Q06730;Q06732;Q6NX49;Q6ZMW2;Q6ZN57;Q8N883;Q9BX82;Q9P2J8;Q9UJN7	P17014;Q06730;Q6ZN57;Q96NG5;P17025;Q06732;Q8N184;Q8N883;Q9BX82;Q9P2J8;Q6NX49;Q6ZMW2;Q9BY31;Q9HCZ1;Q9UJN7;P0CG24	ZFP2_HUMAN;ZN182_HUMAN;ZN33A_HUMAN;ZN33B_HUMAN;ZN391_HUMAN;ZN471_HUMAN;ZN544_HUMAN;ZN614_HUMAN;ZN624_HUMAN;ZN782_HUMAN;ZN883_HUMAN;ZNF12_HUMAN	ZFP2;ZNF12;ZNF182;ZNF33A;ZNF33B;ZNF391;ZNF471;ZNF544;ZNF614;ZNF624;ZNF782;ZNF883	Zinc finger protein 883	Color2 [A=255, R=169, G=169, B=169]	1	4		11.5141	10.4784	9.63207	9.03183	12.2558	9.7215	10.7388	10.5925	10.9648	10.2221	10.5967	10.889
P0CG24;P17014;P17025;Q06730;Q06732;Q6NX49;Q6ZMW2;Q6ZN57;Q8N883;Q9P2J8;Q9UJN7	P17014;Q06730;Q6ZN57;Q96NG5;P17025;Q06732;Q8N184;Q8N883;Q9BX82;Q9P2J8;Q6NX49;Q6ZMW2;Q9BY31;Q9HCZ1;Q9UJN7;P0CG24	ZFP2_HUMAN;ZN182_HUMAN;ZN33A_HUMAN;ZN33B_HUMAN;ZN391_HUMAN;ZN544_HUMAN;ZN614_HUMAN;ZN624_HUMAN;ZN782_HUMAN;ZN883_HUMAN;ZNF12_HUMAN	ZFP2;ZNF12;ZNF182;ZNF33A;ZNF33B;ZNF391;ZNF544;ZNF614;ZNF624;ZNF782;ZNF883	Zinc finger protein 883	Color2 [A=255, R=169, G=169, B=169]	1	4		8.96959	11.3251	13.3867	12.0873	10.9831	14.363	10.6945	14.1239	10.8329	10.6499	11.9048	14.423
P0CG24;P52738	P52738;Q9BUY5;P52737;Q8N9K5;P0CG24	ZN140_HUMAN;ZN883_HUMAN	ZNF140;ZNF883	Zinc finger protein 883	Color2 [A=255, R=169, G=169, B=169]	1	4		14.6002	15.722	16.6885	17.17	15.7905	16.1786	16.9818	15.2062	11.808	16.0461	12.1075	16.0937
P0CG24;Q6ZN57	Q6ZN57;Q96SR6;P51786;P0CG24	ZFP2_HUMAN;ZN883_HUMAN	ZFP2;ZNF883	Zinc finger protein 883	Color2 [A=255, R=169, G=169, B=169]	1	4		11.5495	12.8443	12.7897	10.7078	11.5991	11.8795	12.4218	13.4765	11.5479	12.0513	13.2454	11.3536
P0CG39	A5A3E0;Q6S8J3;P0CG38;P0CG39	POTEJ_HUMAN	POTEJ	POTE ankyrin domain family member J	Color2 [A=255, R=169, G=169, B=169]	1	4		17.6286	17.0175	17.0368	17.69	18.5986	18.5786	18.3663	17.0626	18.684	19.5762	19.4526	19.788
P0CG39;P60709;P63261;P68032;P68133	P60709;P62736;P63261;P63267;P68032;P68133;A5A3E0;Q6S8J3;P0CG38;P0CG39	ACTB_HUMAN;ACTC_HUMAN;ACTG_HUMAN;ACTS_HUMAN;POTEJ_HUMAN	ACTA1;ACTB;ACTC1;ACTG1;POTEJ	POTE ankyrin domain family member J	Color2 [A=255, R=169, G=169, B=169]	1	4		20.8586	20.6241	20.4694	20.5633	21.8132	21.3873	21.3147	21.2632	21.0642	21.6073	22.1599	21.3873
P0CG40	P0CG40	SP9_HUMAN	SP9	Transcription factor Sp9	Color2 [A=255, R=169, G=169, B=169]	1	4		12.6294	14.0423	13.9792	14.2861	13.956	12.8685	13.966	13.5511	12.8708	13.3764	14.4042	13.8803
P0CG40;Q8IXZ3	Q8IXZ3;P0CG40	SP8_HUMAN;SP9_HUMAN	SP8;SP9	Transcription factor Sp9	Color2 [A=255, R=169, G=169, B=169]	1	4		13.5669	14.1744	13.9	14.002	15.3611	15.8176	14.9954	15.632	14.8657	15.7724	16.3313	15.7938
P0CJ78	P0CJ78	ZN865_HUMAN	ZNF865	Zinc finger protein 865	Color2 [A=255, R=169, G=169, B=169]	1	4		15.9355	16.9532	17.0328	16.9789	16.4478	17.4837	17.1915	17.2992	16.3177	17.4287	17.5087	17.4443
P0CK96	P0CK96	S352B_HUMAN	SLC35E2B	Solute carrier family 35 member E2B	Color2 [A=255, R=169, G=169, B=169]	1	4		17.4103	18.0739	18.0472	17.6122	17.0943	16.9424	17.2472	17.2268	17.4492	17.3561	17.3503	16.9867
P0CW24	P0CW24	PNM6A_HUMAN	PNMA6A	Paraneoplastic antigen-like protein 6A	Color2 [A=255, R=169, G=169, B=169]	1	4		12.0601	12.1853	13.152	12.1292	11.9309	13.615	13.605	13.2595	13.0756	14.1755	13.7553	13.4812
P0DJD0;P0DJD1	P0DJD0;P0DJD1	RGPD1_HUMAN;RGPD2_HUMAN	RGPD1;RGPD2	RANBP2-like and GRIP domain-containing protein 1	Color2 [A=255, R=169, G=169, B=169]	1	4		10.7617	12.8792	11.9051	12.192	12.995	13.5386	10.8655	12.7764	13.4594	11.9122	13.3109	11.7891
P0DKB5	P0DKB5	TPBGL_HUMAN	TPBGL	Trophoblast glycoprotein-like	Color2 [A=255, R=169, G=169, B=169]	1	4		13.0495	13.3539	11.415	14.6004	14.8615	14.1705	14.3047	14.1559	15.0134	15.3754	14.7997	15.2281
P0DME0;Q01105	P0DME0;Q01105	SETLP_HUMAN;SET_HUMAN	SET;SETSIP	Protein SETSIP	Color2 [A=255, R=169, G=169, B=169]	1	4		13.0686	13.8355	14.0064	15.6263	13.2107	12.6812	12.5224	12.7444	14.288	11.298	13.7272	12.5734
P0DMU7;P0DMU8;P0DMU9;P0DMV0;P0DMV1;P0DMV2;Q5DJT8;Q5HYN5;Q8NHU0	Q5HYN5;P0DMU9;Q8NHU0;P0DMU7;P0DMU8;P0DMV0;P0DMV1;P0DMV2;Q5DJT8	CT451_HUMAN;CT452_HUMAN;CT453_HUMAN;CT455_HUMAN;CT456_HUMAN;CT457_HUMAN;CT458_HUMAN;CT459_HUMAN;CT45A_HUMAN	CT45A1;CT45A10;CT45A2;CT45A3;CT45A5;CT45A6;CT45A7;CT45A8;CT45A9	Cancer/testis antigen family 45 member A6	Color2 [A=255, R=169, G=169, B=169]	1	4		10.8196	10.249	11.341	11.9623	15.2684	16.0515	14.968	15.7348	16.615	17.7017	17.1225	17.1753
P0DMV8;P0DMV9	P0DMV8;P0DMV9	HS71A_HUMAN;HS71B_HUMAN	HSPA1A;HSPA1B	Heat shock 70 kDa protein 1A	Color2 [A=255, R=169, G=169, B=169]	1	4		15.7381	16.0346	16.0531	16.2019	16.0689	16.2867	16.2011	16.2634	16.3206	16.6623	16.8756	16.8674
P0DMW3	P0DMW3	SIML1_HUMAN	SMIM10L1	Small integral membrane protein 10-like protein 1	Color2 [A=255, R=169, G=169, B=169]	1	4		13.9121	13.1817	13.8331	13.452	13.0001	13.9405	13.6061	13.8753	14.5834	14.5057	14.4523	13.9107
P0DOY2	P0CG04;P0DOY2;P0DOY3;B9A064;P0DOX8	IGLC2_HUMAN	IGLC2	Immunoglobulin lambda constant 2	Color2 [A=255, R=169, G=169, B=169]	1	4		14.1529	14.7014	14.7255	16.9808	15.3439	12.8211	13.1852	13.1771	13.7587	13.1593	13.8329	10.3104
P0DP23;P0DP24;P0DP25	P0DP23;P0DP24;P0DP25	CALM1_HUMAN;CALM2_HUMAN;CALM3_HUMAN	CALM1;CALM2;CALM3	Calmodulin-1	Color2 [A=255, R=169, G=169, B=169]	1	4		16.647	16.9538	17.0026	17.3765	17.3016	17.2801	16.4702	17.1668	17.379	17.5002	17.212	17.6362
P0DP91;Q03468	P0DP91;Q03468	ERCC6_HUMAN;ERPG3_HUMAN	ERCC6	Chimeric ERCC6-PGBD3 protein	Color2 [A=255, R=169, G=169, B=169]	1	4		11.4719	12.2364	10.6385	12.84	9.57008	13.0576	13.064	11.2404	11.9127	13.1543	12.8612	13.0639
P0DPB5	P0DPB5	RPC22_HUMAN	POLR1D	Protein POLR1D, isoform 2	Color2 [A=255, R=169, G=169, B=169]	1	4		15.3144	15.4457	15.6787	15.7763	15.7029	16.4213	15.7316	15.9278	15.826	16.2549	16.2905	16.2771
P0DPB6	P0DPB6	RPAC2_HUMAN	POLR1D	DNA-directed RNA polymerases I and III subunit RPAC2	Color2 [A=255, R=169, G=169, B=169]	1	4		18.6884	19.034	19.0172	19.2312	19.4119	19.721	19.3719	19.5387	19.3077	19.7461	19.4855	19.6451
P0DPD7	P0DPD7	EFMT4_HUMAN	EEF1AKMT4	EEF1A lysine methyltransferase 4	Color2 [A=255, R=169, G=169, B=169]	1	4		13.5659	14.8984	14.7721	12.5788	13.2175	13.9252	13.3557	11.0925	13.2328	14.448	13.978	14.4828
P10070	P10070	GLI2_HUMAN	GLI2	Zinc finger protein GLI2	Color2 [A=255, R=169, G=169, B=169]	1	4		13.7807	14.4499	14.0234	13.9563	14.3679	14.7749	14.6319	14.5712	14.539	15.283	15.4151	15.1811
P10070;P10071	P10070;P10071	GLI2_HUMAN;GLI3_HUMAN	GLI2;GLI3	Zinc finger protein GLI2	Color2 [A=255, R=169, G=169, B=169]	1	4		12.3881	11.9577	12.4496	12.4826	11.7392	14.1033	13.4582	12.4202	12.5276	14.2544	14.4681	14.3234
P10071	P10071	GLI3_HUMAN	GLI3	Transcriptional activator GLI3	Color2 [A=255, R=169, G=169, B=169]	1	4		10.2248	16.1564	18.1348	16.582	15.86	16.0922	16.0694	16.4575	16.2528	16.8472	17.0581	16.8044
P10073	P10073	ZSC22_HUMAN	ZSCAN22	Zinc finger and SCAN domain-containing protein 22	Color2 [A=255, R=169, G=169, B=169]	1	4		13.6927	14.9018	14.7473	14.8373	13.6969	15.1472	14.947	14.2312	14.2254	14.7777	14.1194	14.9691
P10074	P10074	TZAP_HUMAN	ZBTB48	Telomere zinc finger-associated protein	Color2 [A=255, R=169, G=169, B=169]	1	4		15.1094	16.3691	16.4808	16.2846	15.8214	16.92	16.5603	16.78	14.989	16.619	16.7531	16.5766
P10075	P10075	GLI4_HUMAN	GLI4	Zinc finger protein GLI4	Color2 [A=255, R=169, G=169, B=169]	1	4		9.68806	11.1065	10.7204	11.2898	10.056	12.4256	11.0853	11.4932	12.0813	12.1044	10.3021	12.9298
P10075;P17036;P51508;Q15937;Q5JVG2;Q6P3V2;Q96PQ6	P17036;P51814;Q96NG5;Q96PQ6;Q9Y473;P51508;Q15937;P10075;Q52M93;Q5JVG2;Q6P3V2	GLI4_HUMAN;Z585A_HUMAN;ZN317_HUMAN;ZN484_HUMAN;ZNF3_HUMAN;ZNF79_HUMAN;ZNF81_HUMAN	GLI4;ZNF3;ZNF317;ZNF484;ZNF585A;ZNF79;ZNF81	Zinc finger protein GLI4	Color2 [A=255, R=169, G=169, B=169]	1	4		13.3482	13.8463	13.9311	14.0871	13.5554	14.5363	13.5826	14.0572	12.6041	14.2495	14.3772	14.1349
P10109	P10109	ADX_HUMAN	FDX1	Adrenodoxin, mitochondrial	Color2 [A=255, R=169, G=169, B=169]	1	4		17.0995	16.4793	16.2541	16.16	17.2967	16.8093	16.9277	17.0778	17.485	17.1418	17.1556	17.4273
P10114	P10114	RAP2A_HUMAN	RAP2A	Ras-related protein Rap-2a	Color2 [A=255, R=169, G=169, B=169]	1	4		16.0046	16.1768	15.8333	16.5181	16.2643	16.6289	16.4731	16.3245	16.6469	16.7585	16.7633	16.527
[truncated: 7,836 more rows]
