# Supplementary material for: PRC2 loss impairs small cell lung cancer tumorigenesis and enhances sensitivity to G9a/GLP inhibition
Source: Research Square preprint supplement (doi:10.21203/rs.3.rs-5952196/v1), 2025-03-31
Supplement: Supplementary file 2 [file 63d8d1a958b5ee9ea2f930df.xlsx]

## Sheet: H69
Percentage survival in H69 cells for different library drugs
Venetoclax [uM]	DMSO			GSK 5 pretreated			EPZ 5 pretreated			GSK5 non-pretreated			EPZ 5uM non-pretreated
0	100	100	100	100	100	100	100	100	100	100	100	100	100	100	100
0.099999	86.4534	89.2182	100.484	74.4714	86.0388	85.3619	68.8855	91.1238	83.7965	97.613	95.9717	95.0183	81.5608	96.3685	93.7699
1.75969	81.4996	87.1385	90.4323	62.9607	77.7478	72.6589	56.1653	77.1581	71.6808	86.3425	89.5951	91.6369	86.4419	92.6093	90.5272
3.43883	53.4538	65.812	48.3325	42.5759	49.9737	34.7508	43.1312	54.5919	50.3581	41.0715	46.2741	58.5705	55.2779	54.0139	60.4696
5.03745	31.6886	41.2371	26.8073	23.326	25.7618	12.4833	27.6776	30.9087	26.418	19.1055	20.0504	21.8806	26.7474	26.2396	28.5229
6.71549	21.7268	29.5547	18.9161	12.1053	14.5188	4.36534	16.7277	22.9168	12.7704	13.3173	14.0049	14.2287	20.0265	18.5635	20.2732
8.39297	15.636	18.5467	11.769	4.67832	7.06975	1.1401	9.19826	13.5621	4.93869	7.21741	7.31867	8.83311	13.1307	13.9535	15.2636
10.0699	8.5702	11.4212	6.43898	2.6196	3.1441	0.385815	4.01247	6.87961	1.76371	4.31121	4.73738	6.04949	8.71443	9.60712	9.57993
11.6663	4.72691	5.99335	4.09238	1.3909	2.13166	0	2.13835	3.0696	1.54129	1.73945	3.03287	3.09418	5.37201	6.329	5.89681
13.3422	2.82768	5.48241	1.12818	1.04075	2.03745	0.53465	1.44488	1.89018	0.0892818	1.69818	1.15361	1.92923	3.26028	3.16776	4.09738
15.0174	1.91831	3.55774	1.85857	0.594625	1.17306	0.157505	1.13105	1.25431	0.609309	1.71811	1.65025	1.44792	2.59013	2.54802	1.8277
Navitoclax [uM]	DMSO			GSK 5 pretreated			EPZ 5 pretreated			GSK5 non-pretreated			EPZ 5uM non-pretreated
0	100	100	100	100	100	100	100	100	100	100	100	100	100	100	100
0.099998	83.6322	83.4387	94.5753	60.4864	73.4573	76.8841	53.1408	73.5458	71.7403	93.211	91.7748	87.1426	82.421	91.1007	89.4535
0.165994	79.9119	79.3927	94.4116	62.2193	78.2383	75.1573	56.6499	71.6681	67.9842	91.6881	88.5283	85.3154	83.1494	95.2622	92.9164
0.277985	78.7588	82.2215	93.0293	53.9095	73.5111	79.0545	47.9841	68.9958	63.1191	89.1847	92.0936	91.8484	82.4987	87.2382	87.9775
0.479955	77.4206	85.1086	91.3745	55.5643	73.8446	79.9648	47.2477	63.7711	62.5474	84.545	89.261	88.5926	86.5779	86.4961	85.2729
0.759882	68.3728	76.4517	85.3787	46.4181	66.1458	71.328	36.5521	55.1068	50.4959	77.715	85.3614	87.0322	83.6892	82.1198	79.3419
1.27967	61.4933	74.6212	79.6883	37.2983	50.6152	62.4803	31.6359	46.1319	43.9031	70.8352	79.6072	78.2552	75.6529	74.4818	76.1997
2.15907	43.392	52.8986	61.8481	19.2139	21.7315	35.5441	20.2	29.3522	31.2048	56.3056	59.1806	62.3321	63.5417	62.9241	61.0214
3.59741	14.799	18.9579	19.3797	3.76392	2.80463	3.03594	5.58162	6.0773	7.3728	9.76639	12.9595	12.3188	19.8961	19.841	20.1727
5.99281	3.23006	3.81944	4.35235	0.3858	1.06987	0.564995	1.52587	1.40775	0.603044	3.04597	3.48965	3.10644	4.1996	3.42055	2.86604
9.98	0.850283	1.44891	1.46243	0.694819	0.95023	0	1.05766	0.474106	0.454241	1.03069	1.85872	1.68397	1.53704	1.49336	2.39308
UNC0642 [uM]	DMSO			GSK 5 pretreated			EPZ 5 pretreated			GSK5 non-pretreated			EPZ 5uM non-pretreated
0	100	100	100	100	100	100	100	100	100	100	100	100	100	100	100
0.099999	89.0482	99.4019	92.1204	55.4683	71.7962	81.7893	48.9902	59.5102	67.66	99.1842	97.4432	97.8142	87.1981	100.579	101.4
0.175997	87.0121	101.714	95.9207	46.9296	72.3049	76.4623	37.114	51.3088	60.3199	99.1529	99.7701	99.3961	94.6641	97.7738	98.91
0.303991	90.4691	104.425	93.2383	41.8461	66.717	65.9808	27.47	42.0611	45.9535	98.0599	98.8534	100.533	98.574	100.764	100.329
0.531972	85.49	102.27	92.4811	37.1275	57.7089	57.2239	25.5389	34.9562	39.513	99.086	98.1851	97.8571	98.6517	99.228	98.3528
0.959911	83.6448	101.713	92.1742	30.0854	51.5576	50.7986	26.769	31.3802	39.3177	96.8231	102.636	102.125	98.4352	101.503	100.111
1.59974	82.041	102.198	90.5134	24.5083	40.5944	40.4546	20.686	26.7094	36.1538	97.3355	99.4512	100.953	98.3312	96.0097	102.759
2.79921	79.6107	99.8325	85.2892	13.3762	14.6263	17.8203	13.8791	20.7729	27.936	90.208	94.0158	93.884	96.3276	94.8273	96.4772
4.95756	64.879	91.4364	83.1157	1.17259	1.45222	2.75639	4.73631	5.7062	10.4596	82.6194	88.1634	90.1316	91.5672	88.793	87.5834
8.55265	28.2166	64.2016	62.6439	0.296153	0	1.80624	0	1.1403	0.309501	26.4878	17.929	17.8707	70.5831	54.631	48.8603
15.0174	0	1.85307	2.75797	0	0.264435	0.757031	0.049099	0.585814	0.387624	0.6265	0.945146	1.14441	2.82184	1.00681	1.90109
Panobinostat [uM]	DMSO			GSK 5 pretreated			EPZ 5 pretreated			GSK5 non-pretreated			EPZ 5uM non-pretreated
0	100	100	100	100	100	100	100	100	100	100	100	100	100	100	100
0.0004	87.6261	87.9679	98.4336	68.0769	83.8195	84.0932	68.7564	92.012	78.7606	104.975	91.0666	90.4382	88.4204	93.2698	98.4235
0.0012	87.7594	91.4198	100.522	62.4418	80.6625	88.7822	55.4515	90.9925	79.7788	100.77	97.1275	98.6603	90.5572	96.9176	102.77
0.002	82.8826	89.8455	100.666	52.5394	79.3569	84.2853	41.7683	89.973	61.9616	102.332	100.828	101.551	97.6083	99.5243	100.625
0.0044	79.2554	95.1598	100.242	29.1035	54.0459	64.7258	16.8998	73.7109	39.2448	101.478	98.0165	96.1158	98.37	97.5591	95.5204
0.0084	63.888	88.9538	90.0816	3.38529	18.8138	19.3702	1.93335	35.114	6.19177	92.9192	87.9213	85.9684	86.9636	89.9074	86.1047
0.0176	37.8496	68.4013	73.9181	0.533454	0.966681	0.657475	0.408486	2.40902	0.610875	58.5187	52.2461	47.39	56.7903	54.0411	50.4259
0.035599	2.98749	12.5179	23.3741	0.665289	0.289227	0.19363	0.712192	0.661356	1.14813	5.02424	2.27258	3.86979	2.90231	3.21941	2.07505
0.071995	0.949153	2.45555	1.71965	0.444862	0.256326	0.218195	0.452776	0.180228	0.878721	0.925375	1.592	0	1.00009	1.03671	0.97963
0.143979	0.833038	0.726115	0.297382	0.143225	0.212957	0.686375	0	0.312863	0.603044	1.13032	0.702958	0.794928	1.19988	1.10738	1.21611
0.303909	0.879024	0.877042	1.09655	0.977472	0.245858	0.788969	0.323701	0.583335	0.316402	0.461407	1.11376	0	0.844692	1.22155	0.588213
FK866 [uM]	DMSO			GSK 5 pretreated			EPZ 5 pretreated			GSK5 non-pretreated			EPZ 5uM non-pretreated
0	100	100	100	100	100	100	100	100	100	100	100	100	100	100	100
0.0002	101.724	101.385	100.667	88.5654	90.2879	86.0251	90.6946	92.0605	94.9896	99.5542	101.817	100.408	83.4547	90.7084	87.3341
0.00239994	36.5032	51.0202	35.3726	34.8779	50.1516	45.6287	7.13628	7.8474	13.9937	43.8183	47.3507	55.648	41.381	42.4161	50.838
0.00459979	3.73337	3.3895	4.25331	0.0765849	1.44933	0	1.17789	0.899083	0.316402	2.18065	2.72432	1.54305	2.59845	2.45138	4.0886
0.00679954	0.781557	1.21346	2.17906	0.174845	0.307785	0.859774	1.28127	0.27881	0	0.168224	0.700507	2.28597	1.38581	1.6855	0.742019
0.00879921	0.932862	0.269872	0.520213	0.244205	1.01005	0.296225	0	1.01186	0	0.913989	0.572418	1.1844	0.905741	1.05836	1.53288
0.0111987	1.33726	0.902601	0.998886	0.293335	1.10542	1.23258	1.38152	0.260014	0	0.478485	1.23279	1.51174	0.567198	0.328553	0.531124
0.0135982	0.869589	1.0484	1.37852	-0.200855	1.43199	1.49557	0.0939808	1.65406	0.986799	1.68537	0.760282	1.46335	0.550548	0.844692	1.82147
0.0159975	1.60686	0.531217	1.41153	0.0765849	0.247095	2.22963	0	1.47237	1.77937	1.13032	0.731818	0.876986	1.97132	1.46073	0.622697
0.0175969	1.09242	0.833826	1.09242	1.27304	0.371365	1.41176	0	0.106512	0.764378	0.723278	2.32867	0.65781	1.70215	0.764219	0.500599
0.019996	0.836577	0.663265	1.64262	0.706605	-0.426275	2.4406	0.410383	0.47617	1.46297	1.11609	0.726125	1.37796	1.50513	0.533899	1.31921
CD532 [uM]	DMSO			GSK 5 pretreated			EPZ 5 pretreated			GSK5 non-pretreated			EPZ 5uM non-pretreated
0	100	100	100	100	100	100	100	100	100	100	100	100	100	100	100
0.048	85.321	93.6367	99.8531	75.5651	79.4407	97.5403	67.0455	92.5139	82.2207	102.11	93.0961	102.897	95.8087	93.9276	95.776
0.064	86.3304	90.9601	99.9177	75.7676	85.3224	97.7311	60.4627	88.1916	76.1903	102.88	97.5567	100.212	93.0463	91.1795	93.1121
0.083999	84.6646	82.8959	93.2892	70.2706	75.7379	95.6156	62.6469	84.0291	67.5425	102.502	97.5965	97.6088	90.0715	92.1553	88.8419
0.107999	77.0791	61.9377	83.8396	67.3028	73.2509	95.2977	45.3457	66.9062	49.8944	101.653	90.0427	94.1906	82.7429	84.6206	80.3204
0.139998	56.2796	35.4284	64.7202	62.2171	59.1859	84.1654	35.4006	54.1238	37.2618	93.9553	82.587	86.5816	62.0974	61.584	65.1313
0.179997	35.5112	20.3107	32.5775	48.9261	50.3087	72.2991	25.7642	28.165	20.6664	84.1807	67.9975	68.3592	34.656	32.6328	33.6711
0.231995	13.931	9.48546	11.0483	27.3612	26.6382	47.7919	12.7681	15.8481	12.9083	52.4515	39.2936	32.3161	13.8939	15.5137	16.147
0.299991	6.45139	4.15314	4.15152	17.0971	13.3672	23.4032	6.72559	5.30489	5.27233	19.1909	10.7584	10.5284	4.74348	5.9403	4.52685
0.387985	2.42301	2.3877	1.3744	5.18879	2.82557	8.02552	2.57619	1.75495	1.76841	4.38521	1.21492	2.45959	2.14753	2.86061	1.84129
0.499975	3.96699	2.62725	1.60686	10.1141	4.41377	4.42314	3.56071	1.47537	1.35332	2.16927	1.77288	0	1.04865	1.49065	1.06389
JQ1 [uM]	DMSO			GSK 5 pretreated			EPZ 5 pretreated			GSK5 non-pretreated			EPZ 5uM non-pretreated
0	100	100	100	100	100	100	100	100	100	100	100	100	100	100	100
0.004	83.1666	100.081	99.3153	74.7488	97.8665	98.1718	73.8005	96.5333	100.566	99.0348	100.92	101.885	96.1722	97.6651	96.6702
0.008	84.4231	96.8186	98.6262	76.432	99.5849	98.2527	71.3443	98.7699	97.7228	97.0138	99.7088	102.235	95.0456	97.994	94.7648
0.016	83.3045	93.8056	97.3745	71.3348	94.8487	97.6863	73.0286	94.4306	98.8929	97.5418	99.0956	102.75	94.3325	93.2399	97.1948
0.028	82.7101	88.2697	93.8009	66.0129	87.612	89.5697	70.528	87.3164	94.9206	91.7138	95.1164	96.3886	92.6286	94.4903	93.6123
0.052	72.4012	78.1991	87.3856	55.9967	76.9343	77.3696	65.5979	73.5132	87.6121	88.725	94.7516	85.9378	88.383	85.0636	85.7921
0.095999	60.4885	66.8325	76.6402	43.6137	59.787	62.2332	58.3747	63.8595	71.1498	76.8369	79.5796	77.17	80.1039	81.5083	76.7216
0.171997	46.2547	50.5447	64.1892	26.8159	35.1325	40.288	35.1816	37.1842	37.2728	64.8989	69.0337	67.9791	67.4072	64.0494	62.6876
0.307991	29.7146	32.0263	51.371	8.74093	13.3927	14.07	8.87811	11.1916	7.44172	50.9144	53.7513	50.235	50.2664	49.6105	48.3547
0.555969	14.1437	19.6018	36.5142	2.96237	5.14058	3.18478	2.84067	4.31923	2.80533	36.3236	32.8067	37.8773	34.8849	29.6672	34.4675
0.959904	21.5981	18.9454	38.4372	5.65179	6.1261	5.76699	5.62338	4.77695	4.21817	40.4894	41.7216	33.5179	35.2401	38.0555	30.73
BKM120 [uM]	DMSO			GSK 5 pretreated			EPZ 5 pretreated			GSK5 non-pretreated			EPZ 5uM non-pretreated
0	100	100	100	100	100	100	100	100	100	100	100	100	100	100	100
0.099999	77.2481	93.9939	98.2273	66.9537	93.2978	93.5362	64.4311	91.1928	91.564	89.2957	96.4316	96.217	97.149	93.8053	100.117
0.155998	71.7241	93.1382	97.5822	61.6634	95.6682	88.7302	62.743	89.3463	86.7193	91.5202	97.3022	98.9914	97.2226	91.8265	94.319
0.239994	74.1924	83.6048	93.7995	57.8919	88.7217	84.7116	60.4209	83.6273	81.4939	86.529	90.5639	92.9306	91.9266	90.5489	92.4761
0.367986	66.3012	75.1473	88.1256	51.0492	77.4457	77.1731	51.0351	75.2492	69.7682	80.6554	86.9096	85.0702	86.367	80.4889	85.0229
0.567968	52.9939	61.8449	77.9277	36.347	62.0063	62.0858	41.9151	60.2952	56.1911	72.4121	78.5342	79.9475	76.4202	74.1828	75.2184
0.879923	35.0157	36.0432	58.419	24.2605	47.1906	43.5291	30.8019	47.6234	42.5483	60.2948	68.9325	59.9409	62.9409	65.6858	58.3549
1.35981	8.33222	8.67128	16.7387	6.05362	14.8119	11.5571	9.29191	18.1276	11.1665	24.7785	26.4485	24.3822	31.3496	31.5863	29.1997
2.07956	3.77615	3.46774	3.47891	2.52046	6.38631	4.75838	3.36963	4.37905	4.14456	6.3279	6.61663	7.15313	7.35748	6.67149	5.64674
3.19896	2.35403	2.92911	2.82004	2.90858	5.05384	3.25125	3.08237	3.19963	2.35265	4.49765	4.44308	3.91271	3.45869	2.25717	2.08593
4.95752	1.99304	2.3794	1.74716	2.98663	4.78166	2.65157	2.11304	3.14632	2.16313	4.10769	3.60002	2.44119	2.58181	2.67305	1.3194
SGI1027 [uM]	DMSO			GSK 5 pretreated			EPZ 5 pretreated			GSK5 non-pretreated			EPZ 5uM non-pretreated
0	100	100	100	100	100	100	100	100	100	100	100	100	100	100	100
0.008	78.0552	100.541	101.849	70.4605	108.422	99.4983	76.1327	100.139	102.611	98.8028	102.361	105.699	104.075	100.372	104.539
0.02	81.0282	100.14	103.091	75.082	110.147	102.703	71.076	99.7568	100.522	100.976	101.962	106.398	102.725	102.055	102.686
0.04	84.8979	101.567	102.119	71.339	112.646	101.911	75.4013	100.389	98.0533	99.429	105.678	107.168	102.94	100.448	99.614
0.079999	84.7853	96.064	103.344	76.6946	110.744	101.479	75.1267	100.519	96.841	97.3853	100.797	105.236	103.029	98.872	99.5216
0.159997	81.8491	100.484	101.794	67.5949	108.517	95.5144	75.9226	97.883	98.9242	95.7841	104.963	102.272	100.417	98.8366	97.8771
0.31599	80.7304	100.01	102.004	61.8586	92.1388	91.9612	70.9089	99.6944	93.8869	99.577	99.2888	106.361	102.22	99.9701	104.996
0.62796	81.5019	97.5165	97.8119	32.2433	57.6844	67.8066	55.0517	94.1315	84.3635	96.1215	97.5168	102.333	100.365	96.48	100.688
1.27984	63.834	78.3057	89.5795	2.10808	2.50703	16.3502	22.4184	76.8083	38.6653	73.9492	74.4967	72.8627	95.663	94.9252	86.2107
2.47938	0	0	44.1152	0	0.47018	0.05202	1.07031	6.61434	1.28754	0.266426	0	0.614054	43.9617	40.4339	43.7664
4.95752	0.481245	0.183329	1.06078	0	0.018544	0	0	0.0033809	0	0.0785615	0.292158	0	1.58005	5.02156	0.433277
Vorinostat [uM]	DMSO			GSK 5 pretreated			EPZ 5 pretreated			GSK5 non-pretreated			EPZ 5uM non-pretreated
0	100	100	100	100	100	100	100	100	100	100	100	100	100	100	100
0.008	67.1703	96.3589	104.59	61.8343	106.077	102.528	70.2243	94.9599	96.5262	100.855	115.843	111.84	105.787	105.238	104.295
0.02	68.7304	96.6317	108.01	63.5629	110.412	97.6371	68.9576	96.6178	95.4814	95.8553	107.036	109.914	108.683	102.484	101.123
0.04	70.5066	98.116	105.059	64.8781	111.184	97.4811	60.8132	93.6374	90.6758	96.6267	116.297	109.58	105.214	102.721	104.477
0.079999	75.4214	99.4965	100.901	64.3729	107.139	92.7184	60.2792	93.2811	83.9531	97.1063	107.069	108.014	104.758	101.93	98.5295
0.159997	76.8216	98.2739	100.127	58.5521	95.562	83.4545	52.7486	86.1422	65.6566	100.708	102.336	102.327	103.741	98.4669	104.118
0.31599	72.8622	83.404	94.2782	38.449	69.406	61.6234	30.6058	64.1651	28.2553	94.2058	94.2059	94.4665	97.0575	95.9934	97.2329
0.62796	58.1317	67.7159	77.4311	11.0496	20.4827	12.6914	6.22953	26.8269	3.80936	77.604	76.1	79.8156	76.0095	69.9071	66.0881
1.27984	41.0031	39.2196	55.3544	0.777084	2.40384	0	0	2.91226	0.0751847	36.1115	32.8067	29.5693	33.7388	28.3462	24.7338
2.47938	10.7327	8.71144	11.7594	0.200177	0	0	0.341417	0.358375	0	4.05645	3.2536	2.77229	3.75699	3.71955	2.22184
4.95752	1.65044	1.79922	1.43217	0	0	0	0	0	0	0.26358	0	0.221648	1.13606	0	1.14272
Prima-MET [uM]	DMSO			GSK 5 pretreated			EPZ 5 pretreated			GSK5 non-pretreated			EPZ 5uM non-pretreated
0	100	100	100	100	100	100	100	100	100	100	100	100	100	100	100
0.959904	99.0883	93.2149	100.436	86.8835	79.67	89.5162	92.8844	87.3239	100.491	93.5056	86.4237	103.314	86.8956	80.5826	85.0364
6.47583	100.26	96.6812	105.927	86.0685	84.9905	100.562	100.206	98.376	102.452	93.1868	89.9191	102.446	91.7434	81.4484	92.1292
11.9058	102.191	96.8077	104.687	89.3111	87.4615	98.9723	99.8672	96.7345	104.717	95.444	93.7931	99.429	96.1084	83.4769	101.042
17.3299	97.7513	96.0402	103.647	89.2417	85.6465	96.1835	98.0627	95.9732	101.966	95.5237	90.9096	98.279	94.2215	79.5226	97.2239
22.7481	101.256	93.955	99.71	92.1057	78.9678	103.229	98.1003	96.3084	107.032	93.4857	95.6062	102.953	88.4801	83.0912	103.135
28.2401	101.504	96.1805	104.048	86.1378	83.349	100.31	99.2156	95.4031	105.183	96.8302	94.8178	101.057	96.4497	85.3167	102.349
33.6463	100.678	98.2548	101.729	87.8054	76.8118	99.8278	100.766	95.1807	108.144	90.4571	92.3926	95.7571	89.049	86.016	103.665
39.1264	95.9824	92.3731	107.669	92.0103	83.1756	103.946	92.8687	97.0853	105.428	91.4448	86.25	91.5899	85.153	80.8518	98.4449
44.5208	97.6248	90.6813	109.795	85.5136	81.7566	106.33	89.8144	93.8085	117.232	77.1699	68.7359	76.3814	77.2971	52.1423	88.1665
49.9888	90.5135	93.9165	109.768	88.4296	78.8868	93.5651	88.6615	79.5673	114.929	43.3002	45.2842	82.0885	64.5296	38.9113	94.8625
verteporfin (µM)	DMSO			GSK 5 pretreated			EPZ 5 pretreated			GSK5 non-pretreated			EPZ 5uM non-pretreated
0	100	100	100	100	100	100	100	100	100	100	100	100	100	100	100
0.02	108.396	101.05	104.125	108.261	106.998	106.223	94.1187	92.2297	94.858	101.236	96.5029	105.518	102.994	99.0499	97.1962
1.67972	100.96	103.947	101.875	102.315	103.099	102.741	84.4152	85.7011	88.3577	97.7724	96.1641	95.7913	100.376	96.4719	100.859
3.35888	98.6949	97.0939	97.1599	97.4435	93.9004	95.7529	77.8005	77.4496	72.0457	88.5599	94.0122	94.1346	92.8493	89.3043	92.2207
5.03747	91.2356	90.8628	94.8518	84.5599	81.3809	85.0656	56.4934	56.0752	58.431	89.3441	87.6903	90.9779	85.9965	84.1984	87.4562
6.63557	82.8354	86.0431	87.5727	69.2212	74.416	76.9101	38.4883	41.9155	37.4294	81.5477	76.185	84.7243	79.4671	81.2209	82.378
8.31307	78.1725	77.1904	81.9579	56.8101	56.8593	56.9055	26.5731	28.2287	23.7176	68.6335	74.9184	77.8075	67.5779	70.5817	72.8516
9.98999	66.65	64.346	71.9525	41.2186	34.1005	37.8373	18.8964	16.8194	16.384	58.0063	61.4633	63.3989	47.4249	56.1909	59.5208
11.6664	53.2444	51.7795	58.104	26.0851	21.4857	24.4104	10.8767	9.10048	11.9105	44.9156	47.5158	48.3583	35.7854	43.6593	44.2448
13.3422	37.0342	42.4426	39.6641	10.969	9.17141	12.2261	5.81115	6.68204	6.85434	36.1827	35.7799	39.9898	22.2006	27.3371	32.7204
15.0174	29.938	31.9421	29.8596	6.6889	4.31332	5.35661	3.28463	4.37951	2.83822	30.2394	28.1259	28.6866	23.7643	21.3238	21.9648

## Sheet: H82
Percentage survival in H82 cells for different library drugs
Venetoclax [uM]	DMSO			GSK 5 pretreated			EPZ 5 pretreated			GSK5 non-pretreated			EPZ 5uM non-pretreated
0	100	100	100	100	100	100	100	100	100	100	100	100	100	100	100
0.099999	95.5143	83.6986	91.165	88.2495	88.2203	86.7717	84.3203	92.3538	83.6282	90.9618	82.9347	76.2388	83.5785	88.8166	86.4524
1.75969	70.2263	62.6383	64.7079	86.669	93.174	90.3933	80.3479	92.8492	91.5969	74.4863	68.6548	68.6233	75.6985	72.5215	75.3273
3.43883	46.174	43.2547	43.8612	81.7408	91.264	88.0896	80.8807	92.3859	88.7382	52.5593	48.6048	45.7318	57.61	51.9952	60.6031
5.03745	32.0908	29.7885	35.8066	70.2132	85.0259	79.5481	80.8024	94.6473	76.7794	32.3958	35.7667	31.1028	37.1786	39.1277	38.3575
6.71549	23.8628	23.3117	24.016	54.3851	64.9792	67.9244	74.1392	75.5826	71.149	21.9041	24.5489	22.9276	27.31	31.181	28.8689
8.39297	21.0417	20.3203	19.9991	42.1589	48.1997	46.8245	61.8171	63.459	62.228	17.3559	18.4968	17.7692	21.8543	23.3289	23.7901
10.0699	17.1834	17.0677	15.4953	28.8494	35.8841	37.3499	53.5423	54.4239	46.9393	14.522	13.249	14.8119	16.4204	16.8471	20.1848
11.6663	8.68058	9.6326	10.8905	21.1929	23.9507	30.3493	43.7067	31.8074	36.8426	5.14388	5.8026	6.27615	11.1912	11.6369	15.2537
13.3422	6.42227	5.6318	5.76836	10.2037	13.1992	20.2404	31.1123	19.0673	19.976	2.14008	2.65712	2.68214	4.60106	5.36052	7.48625
15.0174	5.73758	4.03744	5.05738	4.97503	7.86143	14.1378	25.1044	27.2827	11.5492	1.47671	2.59093	2.26051	4.73615	3.62276	3.75481
Navitoclax [uM]	DMSO			GSK 5 pretreated			EPZ 5 pretreated			GSK5 non-pretreated			EPZ 5uM non-pretreated
0	100	100	100	100	100	100	100	100	100	100	100	100	100	100	100
0.099998	86.5281	71.0162	78.4822	78.8176	83.8806	76.4273	71.183	87.298	83.2243	85.9932	77.6034	73.9344	80.6879	81.8985	78.3328
0.165994	83.8304	76.1116	81.741	80.5963	88.8078	84.5402	75.8344	94.3943	78.9945	85.1181	80.536	75.663	80.9697	82.3678	79.9831
0.277985	84.1757	73.045	80.0839	77.4684	94.5974	82.5018	73.3597	85.2539	76.4231	84.1268	79.1186	76.2533	81.7991	80.3706	79.6063
0.479955	86.1299	75.7794	80.7507	81.8696	85.6201	90.2088	67.7927	81.6933	79.8615	84.8722	79.8266	74.5436	83.5334	82.8326	90.17
0.759882	86.8778	79.7049	82.4036	79.105	83.8988	87.7329	66.6813	79.1414	76.2409	90.7903	79.6913	69.5945	91.4207	85.7054	86.5385
1.27967	80.2733	70.5902	73.8857	79.8994	90.0624	83.8549	65.0934	71.7582	71.1999	83.6498	76.012	67.2014	82.6881	82.3348	88.455
2.15907	54.5313	49.9573	53.898	86.9266	83.7101	77.3639	59.7305	62.7818	67.4742	66.0518	61.1522	54.2705	64.4529	66.6425	70.733
3.59741	26.0696	24.1224	33.1744	64.7253	69.875	61.6444	52.79	57.3162	55.0492	30.2745	27.8671	27.0101	26.1175	26.668	30.787
5.99281	8.62915	7.96158	11.571	27.7709	25.1689	27.4078	23.5403	26.1635	29.1876	11.2066	9.51646	8.75067	7.95497	8.0039	12.3405
9.98	0.480458	0.488104	2.70588	2.88916	0	1.28238	2.84974	4.40959	2.9451	0.978808	0.521754	0.207615	0.253613	0.84744	2.5474
UNC0642 [uM]	DMSO			GSK 5 pretreated			EPZ 5 pretreated			GSK5 non-pretreated			EPZ 5uM non-pretreated
0	100	100	100	100	100	100	100	100	100	100	100	100	100	100	100
0.099999	96.8146	82.2761	90.6076	98.7845	90.7294	87.3165	84.9858	105.702	98.5655	96.6474	86.7593	81.1355	89.3697	89.5138	91.8865
0.175997	95.7214	85.9716	90.1926	103.301	95.4514	95.0814	83.9067	103.843	94.477	94.131	89.0976	84.3559	93.8973	92.481	92.9217
0.303991	97.6447	86.8788	91.4845	93.891	97.1098	94.2801	93.1245	105.662	99.733	92.2796	89.3652	86.6341	97.6434	97.9567	96.3855
0.531972	97.8872	85.7033	86.6474	95.9257	73.2647	101.723	88.2331	105.128	99.1747	99.8017	87.5925	87.0252	97.4241	95.4272	106.217
0.959911	106.093	95.8799	94.8444	90.8324	95.2495	98.7152	84.3135	100.876	99.3586	98.2111	93.5971	91.3956	103.606	105.361	107.675
1.59974	104.465	96.8198	101.914	74.5815	93.8807	89.7132	74.2907	89.4632	80.0306	104.322	100.462	95.3298	103.525	107.971	109.956
2.79921	106.549	102.5	104.398	1.41436	42.483	54.3996	47.0987	56.0331	52.1642	107.142	98.2477	97.6648	103.23	113.664	111.022
4.95756	97.5595	95.4285	99.1504	1.16993	0.562406	1.64962	0.434678	2.20872	0	94.2682	89.0199	90.0609	91.1622	102.017	109.019
8.55265	0	12.9278	16.6433	0	0.489581	0	1.01164	0.298321	0	0.337798	0	1.05523	0	2.1099	2.88271
15.0174	0.0293858	0	0	1.14846	0	0	0	0	3.6019	0.0545604	0	0	0	0	0
Panabinostat [uM]	DMSO			GSK 5 pretreated			EPZ 5 pretreated			GSK5 non-pretreated			EPZ 5uM non-pretreated
0	100	100	100	100	100	100	100	100	100	100	100	100	100	100	100
0.0004	87.6726	84.2594	91.8193	75.4552	82.2404	79.787	77.2657	85.4428	87.4902	85.2344	86.8097	83.9415	80.7751	98.0601	86.8415
0.0012	95.3115	88.459	94.4184	78.1025	90.0326	83.1116	75.4889	89.4561	80.9419	93.733	88.6817	87.1255	85.7921	89.7552	86.9507
0.002	93.8731	89.4571	90.5398	75.3181	77.0781	78.4375	73.8533	79.4639	80.7153	86.9159	87.1579	80.0116	82.8958	88.6096	87.7598
0.0044	89.7679	91.4631	86.379	60.8557	65.2573	64.9584	60.1594	66.6632	68.2886	85.0913	83.1332	76.9977	80.1243	86.476	85.5465
0.0084	76.581	83.453	76.9357	50.6428	50.1246	50.7043	34.3698	39.9426	40.698	65.9981	68.8217	70.1804	64.5066	73.631	76.1425
0.0176	50.9227	61.4301	48.6721	18.3193	16.938	22.2225	5.9626	6.24336	8.71838	35.8945	37.7496	38.128	31.7432	39.6135	42.4165
0.035599	8.00029	11.7295	10.1961	3.20956	1.51906	2.54753	2.16215	0.212781	1.28832	2.14455	1.53332	2.24161	1.08301	2.16988	2.76581
0.071995	1.50162	1.92629	1.86487	0.499419	0	1.08909	0	1.60815	1.52805	0.653831	1.8024	0.75864	1.43017	0	1.10005
0.143979	0.452542	0	1.08473	0.628237	0.502822	0.387981	1.56137	0	2.27352	1.26503	1.18654	1.15701	0.667587	0.454607	0.457124
0.303909	0.0587717	0	0.571552	0.98001	0	0.138464	0.892502	1.73468	0	1.14577	0.225335	1.44342	0	1.12332	0.661691
FK866 [uM]	DMSO			GSK 5 pretreated			EPZ 5 pretreated			GSK5 non-pretreated			EPZ 5uM non-pretreated
0	100	100	100	100	100	100	100	100	100	100	100	100	100	100	100
0.000479998	87.3435	92.6884	87.5368	79.8267	83.0894	91.3298	79.6587	97.962	92.8267	90.3297	91.702	89.3456	82.7592	90.6728	89.3486
0.000639996	83.1369	89.7126	92.4251	87.5806	90.213	94.9707	78.2188	93.3642	87.7874	91.8875	92.043	84.2919	86.4458	88.3757	90.9929
0.000839993	86.916	92.8091	99.5045	87.5789	95.0046	95.7842	90.0967	97.9656	95.183	92.9563	100.105	90.4462	88.3007	94.0643	95.7887
0.00107999	79.0876	91.1721	91.7321	95.8696	100.334	105.832	86.5975	98.7426	99.7199	91.075	93.4071	92.803	89.7692	98.7378	95.8902
0.00139998	75.3805	90.9336	90.3849	89.9505	102.668	105.011	83.5051	99.2451	97.6756	92.0231	92.9524	89.286	93.1594	96.4498	95.298
0.00179997	69.7943	85.1553	87.6558	88.043	101.878	107.691	78.3618	96.6254	101.756	92.2557	92.669	87.7056	90.2122	91.265	97.2576
0.00231995	54.3432	68.1014	67.9986	88.1983	92.2124	92.6512	76.9968	81.1837	87.4935	80.3687	79.0366	83.1462	76.9869	85.1431	84.8374
0.00299991	31.6779	48.8314	49.4038	73.5675	77.4389	81.864	71.9301	75.1887	79.1094	65.9787	67.6921	72.3206	64.1174	76.3389	74.9182
0.00387985	25.9976	36.0794	37.3476	59.8582	67.2533	67.5607	57.6661	64.7047	67.6827	51.1327	57.4355	56.4746	46.5881	54.5966	57.9406
0.00499975	25.1073	38.9799	36.786	59.0919	69.4613	61.2191	53.9473	63.7335	60.806	45.9092	55.2771	53.8765	47.2098	56.1709	49.8594
CD532 [uM]	DMSO			GSK 5 pretreated			EPZ 5 pretreated			GSK5 non-pretreated			EPZ 5uM non-pretreated
0	100	100	100	100	100	100	100	100	100	100	100	100	100	100	100
0.048	95.1499	94.9557	90.6339	75.7078	84.2397	82.7443	72.5717	81.2514	81.4263	92.2542	97.334	92.8742	88.2048	94.0103	95.3165
0.064	94.5519	89.6757	99.0757	80.8424	90.698	88.2232	72.502	75.5131	80.873	91.9948	100.642	88.6128	90.2616	95.0359	91.5558
0.083999	106.053	96.3484	89.0487	76.8589	85.2626	89.1703	68.8887	76.2419	72.7647	92.767	94.4734	92.6997	87.204	91.4794	84.8605
0.107999	90.3218	88.3539	90.3558	61.4569	80.1582	88.8698	59.0668	69.1118	69.9832	88.0683	94.8187	91.7794	86.0216	88.3652	82.3303
0.139998	70.2689	78.9113	72.4028	67.9292	85.1037	74.3838	54.509	56.614	61.32	80.479	95.7353	91.887	73.6576	82.3798	80.6184
0.179997	61.2254	69.1648	62.9692	57.8153	64.9494	73.5474	44.1952	48.1331	48.9606	79.1403	81.4785	81.9075	66.9338	73.1362	68.2936
0.231995	40.8052	42.8373	34.8453	52.6758	61.4787	58.9541	31.0102	31.3833	29.2894	61.0653	68.344	75.6267	46.9338	53.4901	43.5424
0.299991	18.5116	26.35	16.671	42.6841	47.8207	44.194	15.4527	16.1714	16.3882	40.1878	47.6292	49.1834	26.8845	41.5057	22.5166
0.387985	7.2965	8.73959	7.02018	22.1392	32.309	20.8185	5.97622	8.11633	8.25041	18.3219	28.7059	27.9522	10.2572	16.9116	9.2566
0.499975	2.14957	4.38243	3.92313	17.4968	20.5048	11.2349	4.33214	6.31465	2.14052	11.4899	16.5499	13.5194	7.14736	10.3444	5.87432
JQ1 [uM]	DMSO			GSK 5 pretreated			EPZ 5 pretreated			GSK5 non-pretreated			EPZ 5uM non-pretreated
0	100	100	100	100	100	100	100	100	100	100	100	100	100	100	100
0.0479998	114.174	98.7137	99.4589	76.0167	78.3773	83.2609	71.5233	80.8736	79.4953	97.6402	100.079	98.7799	92.3242	111.344	97.4652
0.0839993	106.034	95.0352	99.3219	80.8275	75.8202	74.5419	61.0632	70.1793	74.9765	96.3254	96.8562	94.1274	94.4217	94.2757	100.501
0.139998	98.6086	92.8928	96.2678	70.854	73.8622	68.564	61.4478	71.4553	70.9536	96.8889	98.252	94.1871	89.0502	91.6384	92.554
0.231995	96.9733	88.2872	92.8332	59.8269	48.7161	60.6955	56.7181	62.1884	55.724	88.9359	90.571	87.505	84.7158	85.9423	89.0087
0.387985	91.1049	83.1833	84.3235	59.4354	64.2361	55.359	47.0953	50.6209	50.5008	83.4276	83.575	83.722	79.6668	81.7336	80.2077
0.643958	84.7399	83.2826	80.1144	55.3661	50.8281	53.0413	43.014	50.3215	43.675	84.3951	82.8239	79.0099	71.2755	75.9925	76.9515
1.03989	82.608	79.5857	82.0135	47.2522	46.0928	43.1766	32.2849	41.5109	37.8393	75.3271	77.7229	80.048	73.3802	73.8844	74.0615
1.75968	78.3544	74.7983	75.1126	41.3034	40.4753	43.2451	34.2337	37.2998	36.5717	70.3272	74.845	70.1775	62.4281	68.2693	69.0718
2.95911	73.6747	71.7885	74.995	39.4356	33.6596	40.0787	27.8565	31.3939	32.7146	65.4943	67.2734	65.3026	57.6361	63.5283	65.325
4.95752	74.355	67.4782	74.3297	36.9088	36.9218	33.6756	27.945	32.5024	27.5423	59.9011	67.2302	64.2282	58.8693	60.8025	58.7727
BKM120 [uM]	DMSO			GSK 5 pretreated			EPZ 5 pretreated			GSK5 non-pretreated			EPZ 5uM non-pretreated
0	100	100	100	100	100	100	100	100	100	100	100	100	100	100	100
0.099999	108.437	98.1061	100.824	97.1676	93.2501	94.1061	84.2829	94.4994	89.9434	103.824	99.9787	100.997	93.7448	99.1322	105.065
0.155998	105.87	96.7119	99.1477	90.2181	90.4745	88.304	75.0328	90.3418	89.5165	101.933	97.4318	95.9855	95.8626	97.5698	105.654
0.239994	107.092	93.9406	95.8998	84.5831	88.7069	78.7099	75.7527	83.0459	73.1588	92.53	93.8417	94.3077	88.3791	91.8768	106.262
0.367986	91.2607	86.5566	91.8663	71.8615	74.8553	70.5461	59.545	75.5843	64.2887	90.5935	86.8385	83.8761	82.6285	85.8373	90.0454
0.567968	64.4872	66.8876	68.2006	57.6287	65.4923	59.8573	54.029	55.4717	57.3201	67.14	69.0735	62.8267	56.9651	66.0247	75.4027
0.879923	33.0547	41.3594	43.0299	42.5883	44.158	43.0378	38.6979	46.1728	39.8573	45.2443	49.271	42.5318	36.814	43.5538	49.0135
1.35981	12.0629	15.073	16.2228	12.9634	18.7736	16.8824	14.5608	22.2518	19.8134	15.7086	16.3629	13.313	12.5058	14.4856	17.8454
2.07956	7.77549	8.01695	8.50301	6.27312	5.20002	5.65068	4.14492	5.25252	5.24883	7.65724	8.18402	6.11768	5.99404	6.10421	7.03405
3.19896	3.81869	5.2002	5.43362	2.93541	1.89808	1.11017	0.193001	2.47425	1.35235	4.36275	5.68893	3.9383	2.98293	3.91064	3.6333
4.95752	3.59389	3.99342	3.68244	2.60841	2.05697	1.38956	1.79964	1.53865	1.36877	3.26558	3.61832	2.18636	2.45857	3.36937	2.82272
SGI1027 [uM]	DMSO			GSK 5 pretreated			EPZ 5 pretreated			GSK5 non-pretreated			EPZ 5uM non-pretreated
0	100	100	100	100	100	100	100	100	100	100	100	100	100	100	100
0.0479998	106.628	102.909	107.11	103.8	107.696	104.633	94.4469	100.906	93.9532	105.701	106.117	104.197	105.014	111.367	114.809
0.099999	108.617	104.506	105.134	107.126	114.252	100.219	99.2991	104.93	89.1716	104.407	106.635	105.825	101.57	109.673	119.217
0.151998	104.555	103.458	102.853	98.9992	100.918	97.8577	91.4583	101.622	91.234	106.699	103.127	106.529	106.771	116.516	112.349
0.235994	112.147	102.455	101.917	100.875	102.28	90.3423	96.9607	91.7087	91.1782	104.108	101.895	105.648	103.908	112.415	115.692
0.359987	108.415	102.441	99.0494	89.5839	88.5397	94.4945	101.903	105.734	95.2241	105.364	104.199	110.905	106	112.358	112.665
0.551969	106.093	102.912	106.661	61.2604	70.408	72.674	90.5681	99.4554	94.6346	106.392	105.752	105.636	104.25	110.458	110.959
0.879925	99.045	99.1198	100.316	0.236828	13.3663	3.96907	86.4954	95.9679	92.8957	95.0806	102.848	96.8738	100.668	102.09	107.437
1.27983	90.8301	95.5633	100.152	0	0	0	4.92612	46.1104	40.0708	76.9773	90.9984	84.0709	87.8242	95.1394	98.385
1.9996	5.95357	49.7642	50.3375	0	0	0	0	0	0	0.151457	0	0.174176	41.1048	37.0106	23.864
4.95752	0	0	0.0984862	0	0	0	0	0	0	0	0	0	0	0	0
Vorinostat [uM]	DMSO			GSK 5 pretreated			EPZ 5 pretreated			GSK5 non-pretreated			EPZ 5uM non-pretreated
0	100	100	100	100	100	100	100	100	100	100	100	100	100	100	100
0.008	109.963	103.054	103.925	110.225	115.51	103.716	99.3519	94.797	87.7628	109.026	109.149	108.047	99.1613	134.046	116.639
0.02	107.705	102.155	105.097	110.7	115.778	108.446	96.2663	91.4431	95.0369	107.77	108.437	106.893	101.362	131.084	117.194
0.04	112.73	105.287	106.28	114.88	109.238	103.535	93.6351	93.8775	80.1275	106.665	103.631	107.419	100.068	127.957	110.547
0.079999	108.745	104.006	101.649	98.4228	91.5189	96.0004	87.4468	92.3467	75.7745	106.459	102.625	105.95	102.226	129.361	113.209
0.159997	102.197	105.699	100.781	84.1917	83.1176	81.1348	79.2893	73.886	74.7778	98.8909	99.324	100.843	91.5122	111.689	111.36
0.31599	98.8407	100.4	99.9278	63.9127	67.0514	64.1114	61.4904	61.1584	62.1656	90.8216	85.2053	85.1555	74.9504	91.6953	94.5136
0.62796	74.6635	79.1995	68.498	41.3497	43.3768	45.0778	32.5555	38.9856	39.1152	58.2136	57.624	57.9183	48.5839	60.5521	61.409
1.27984	31.9835	35.7415	29.6997	16.2929	16.7047	14.6737	8.09685	7.72071	7.98112	21.1259	26.0655	23.5614	16.5918	28.0249	24.3731
2.47938	3.01793	2.46437	2.03086	1.33013	1.10694	0	2.73741	0	0.485376	1.1085	0.854145	0.648144	0.748929	1.84901	0.590939
4.95752	0.598002	0	1.44714	0	0.62199	0.113864	0.373407	0	1.13397	0	0	0	0	0	0.603244
Prima-MET [uM]	DMSO			GSK 5 pretreated			EPZ 5 pretreated			GSK5 non-pretreated			EPZ 5uM non-pretreated
0	100	100	100	100	100	100	100	100	100	100	100	100	100	100	100
0.499975	92.3949	81.9708	85.538	82.5765	80.4694	82.9675	85.1542	92.3092	86.487	81.3406	91.2488	79.9288	84.2742	85.6379	79.2341
2.07956	93.4161	86.2116	90.7694	83.9522	84.1504	82.0784	85.9474	97.8087	87.1766	89.4308	88.5738	83.6362	86.2395	87.0383	86.5232
3.7586	94.521	87.8045	92.9688	86.7515	82.0103	84.3064	82.7375	91.9279	80.7597	90.7844	84.634	82.0369	88.8585	92.0357	86.1048
5.35714	89.9897	85.8808	87.4538	81.2322	85.6598	81.9079	82.0839	86.3481	90.5329	86.1363	83.9635	79.4155	86.4908	88.6021	87.1768
6.95517	85.5716	87.8386	85.26	74.0497	76.2025	79.3372	78.6188	82.5969	84.9123	82.5362	83.0685	81.8377	86.2933	86.8224	82.1088
8.55268	94.3021	86.2158	89.7818	82.1686	83.1738	80.6375	80.1812	85.7351	86.8745	85.7114	89.6875	82.979	86.6375	88.5647	91.8204
10.1497	90.407	87.1699	89.4429	70.7285	73.1968	83.9164	76.5952	78.245	83.5839	95.6695	91.0934	82.681	89.7489	93.3326	91.2344
11.7461	85.3115	85.5343	91.9299	67.7211	70.84	70.2017	67.3842	73.3514	76.4395	85.8784	85.5636	84.7528	82.2973	93.5186	83.2393
13.422	88.6732	89.0681	89.4014	57.0292	64.0689	64.4945	55.7276	75.4418	66.4381	85.1077	86.4111	82.9034	84.665	94.859	83.8761
15.0174	87.3891	86.8504	94.0878	42.0053	68.0975	58.441	46.5626	67.2513	55.435	80.6758	89.3235	88.2377	80.9523	90.8857	83.9007
Verteporfin [uM]	DMSO			GSK 5 pretreated			EPZ 5 pretreated			GSK5 non-pretreated			EPZ 5uM non-pretreated
0	100	100	100	100	100	100	100	100	100	100	100	100	100	100	100
0.0479998	108.783	102.11	111.225	100.619	103.254	108.539	96.8143	100.275	100.882	116.134	109.863	104.533	103.316	114.899	113.171
1.67971	104.182	100.319	104.131	95.5409	101.062	98.1054	98.0976	92.27	91.6084	105.07	103.236	104.199	103.497	109.682	110.748
3.35887	96.3914	97.6234	106.195	91.0669	100.043	100.878	103.847	93.7937	93.6625	103.596	101.068	101.134	97.748	109.113	110.044
5.03746	84.6929	89.9156	98.5791	92.5764	91.7324	99.2546	96.3956	92.4055	92.5394	100.981	100.046	90.958	92.2298	98.9582	101.784
6.7155	73.084	82.6807	87.7457	87.1545	100.309	97.0634	92.1067	88.925	96.2503	96.1256	89.5077	88.6826	85.2954	96.7422	95.6718
8.31305	60.7523	72.7681	76.2385	87.3246	88.7135	91.6742	95.7829	91.3184	92.1437	80.1153	83.385	79.8241	79.0771	83.4488	87.1645
9.98998	52.6917	62.1386	68.5699	69.9407	76.2621	83.9743	84.6879	87.3746	92.812	64.0006	70.7081	65.8638	63.1384	67.0458	72.7541
11.6664	35.05	49.3581	56.2979	60.3157	74.4464	70.6094	74.6958	84.7906	85.6479	51.4248	58.1032	55.1167	50.6117	55.4992	60.9768
13.3422	26.8014	41.1918	43.7768	36.2135	61.9951	62.7232	71.6135	74.6006	80.2621	35.3608	38.6244	44.0279	41.0191	43.1145	46.7232
15.0174	18.5954	20.8698	31.6155	37.7956	47.397	48.0387	57.5129	61.2011	66.4381	29.7333	31.0658	31.097	32.7818	33.8049	37.9145
UNC6852	DMSO			GSK 5 pretreated			EPZ 5 pretreated			GSK5 non-pretreated			EPZ 5uM non-pretreated
0	100	100	100	100	100	100	100	100	100	100	100	100	100	100	100
0.499975	88.71	87.5447	92.865	86.9167	89.5626	92.1047	79.6399	92.6211	88.2751	95.6188	94.5453	86.6167	90.2355	117.612	94.9919
2.07956	100.757	87.4936	91.6215	90.4344	100.346	96.4379	93.5227	108.389	98.6115	98.6092	97.2563	95.3647	92.9488	118.537	101.298
3.7586	98.3368	87.5674	92.7364	93.2602	105.819	96.7612	96.496	109.711	103.833	101.495	94.2273	93.9123	95.5474	104.542	103.307
5.35714	99.2786	91.9004	97.1475	95.6251	103.209	108.938	87.4519	109.841	103.181	102.935	99.8017	95.167	100.599	114.792	105.376
6.95517	102.953	98.3091	99.2638	102.256	97.2936	103.584	92.7058	99.0366	106.731	109.842	98.4966	93.5168	102.078	117.262	109.613
8.55268	102.138	98.7804	96.0838	96.6045	104.152	98.8101	95.2468	101.289	97.9662	109.666	99.4808	103.019	104.223	143.752	108.507
10.1497	105.814	102.617	100.601	100.04	104.674	98.5974	91.9961	100.295	96.8414	110.471	109.857	104.793	103.599	134.261	110.039
11.7461	103.063	105.536	99.7341	94.8489	101.355	98.0914	89.6099	92.6692	90.1454	105.687	106.211	110.991	99.7946	133.36	112.057
13.422	99.6797	104.901	100.933	99.1627	105.104	92.3121	84.4122	92.2718	83.4788	102.266	103.546	103.051	98.5135	130.809	117.368
15.0174	103.438	96.8794	99.1117	111.595	97.5435	103.872	91.8991	88.3797	69.9356	105.908	107.391	103.328	98.4844	123.398	112.645

## Sheet: IC50
IC50s for each drug in both cell line in all conditions
H69	DMSO	GSK 5 pretreated	EPZ 5 pretreated	GSK5	EPZ5		H82	DMSO	GSK 5 pretreated	EPZ 5 pretreated	GSK5	EPZ5
Venetoclax	3.827	2.784	2.993	3.384	3.765		Venetoclax	2.886	7.794	9.633	3.196	3.778
Navitoclax	1.798	0.7517	0.4762	2.069	2.134		Navitoclax	1.932	4.052	2.429	2.015	2.56
UNC0642	7.999	0.4569	0.1831	6.808	8.947		UNC0642	6.955	2.376	2.676	5.845	7.464
Panabinostat	0.0185	0.003333	0.002853	0.01769	0.01774		Panabinostat	0.01656	0.006179	0.005331	0.01146	0.01222
FK866	0.002202	0.002319	0.0007326	0.002382	0.0023		FK866	0.003024	0.005965	0.006366	0.00494	0.004798
CD532	0.1415	0.1777	0.1132	0.2154	0.1549		CD532	0.2035	0.2417	0.1449	0.2829	0.2215
JQ1	0.2034	0.09552	0.1118	0.3832	0.3393		JQ1	19.12	0.876	0.4889	10.46	7.37
BKM120	0.6713	0.5459	0.525	0.9382	0.9485		BKM120	0.7489	0.661	0.5833	0.7696	0.7541
SGI1027	1.674	0.6063	1.073	1.421	2.31		SGI1027	1.858	0.6116	1.162	1.412	1.835
Vorinostat	0.9557	0.3157	0.2149	0.9772	0.8935		Vorinostat	0.9535	0.4818	0.3764	0.73	0.7236
Prima-MET	1000	1000	1000	52.2	60.75		Prima-MET	1000	47.53	25.93	1000	1000
verteporfin	12.04	8.605	5.389	11.29	10.34		verteporfin	11.08	14.09	18.28	12.09	12.48
Note: Prima-MET was largely ineffective in most conditions. Where IC50 was not available/unstable 1000 was used as referecne.
Fold change
H69		GSK 5 pretreated	EPZ 5 pretreated	GSK5	EPZ5		H82		GSK 5 pretreated	EPZ 5 pretreated	GSK5	EPZ5
Venetoclax		1.37464	1.27865	1.13091	1.01647		Venetoclax		0.370285	0.299595	0.903004	0.763896
Navitoclax		2.39191	3.77572	0.869019	0.842549		Navitoclax		0.476802	0.795389	0.958809	0.754687
UNC0642		17.5071	43.6865	1.17494	0.894043		UNC0642		2.92719	2.59903	1.18991	0.931806
Panabinostat		5.55056	6.4844	1.04579	1.04284		Panabinostat		2.68005	3.10636	1.44503	1.35516
FK866		0.949547	3.00573	0.924433	0.957391		FK866		0.506957	0.475024	0.612146	0.630263
CD532		0.796286	1.25	0.656917	0.913493		CD532		0.841953	1.40442	0.719335	0.918736
JQ1		2.1294	1.81932	0.530793	0.599469		JQ1		21.8265	39.1082	1.82792	2.5943
BKM120		1.22971	1.27867	0.715519	0.707749		BKM120		1.13298	1.2839	0.973103	0.993104
SGI1027		2.76101	1.56011	1.17804	0.724675		SGI1027		3.03793	1.59897	1.31586	1.01253
Vorinostat		3.02724	4.44718	0.977998	1.06961		Vorinostat		1.97904	2.53321	1.30616	1.31772
Prima-MET		1	1	19.1571	16.4609		Prima-MET		21.0393	38.5654	1	1
verteporfin		1.39919	2.23418	1.06643	1.16441		verteporfin		0.786373	0.606127	0.91646	0.887821
log fold change
H69		GSK 5 pretreated	EPZ 5 pretreated	GSK5	EPZ5		H82		GSK 5 pretreated	EPZ 5 pretreated	GSK5	EPZ5
Venetoclax		0.459055	0.354622	0.177484	0.023564		Venetoclax		-1.43329	-1.73891	-0.147196	-0.388551
Navitoclax		1.25816	1.91675	-0.202541	-0.247167		Navitoclax		-1.06854	-0.330267	-0.0606847	-0.406049
UNC0642		4.12987	5.44912	0.232589	-0.161584		UNC0642		1.54952	1.37797	0.250847	-0.101898
Panabinostat		2.47263	2.69697	0.0645912	0.0605193		Panabinostat		1.42226	1.63522	0.531096	0.438458
FK866		-0.0746884	1.58772	-0.113359	-0.0628194		FK866		-0.980064	-1.07393	-0.708053	-0.665975
CD532		-0.328642	0.321928	-0.606216	-0.130535		CD532		-0.248189	0.489971	-0.475263	-0.122278
JQ1		1.09044	0.863399	-0.913778	-0.738242		JQ1		4.44801	5.2894	0.8702	1.37535
BKM120		0.298321	0.35464	-0.482938	-0.49869		BKM120		0.180123	0.360535	-0.0393357	-0.00998276
SGI1027		1.4652	0.641649	0.236393	-0.464593		SGI1027		1.60309	0.67714	0.39601	0.0179704
Vorinostat		1.598	2.15289	-0.032096	0.0970901		Vorinostat		0.984799	1.34097	0.385336	0.398041
Prima-MET		0	0	4.25981	4.04097		Prima-MET		4.39502	5.26923	0	0
verteporfin		0.484588	1.15975	0.0927899	0.219599		verteporfin		-0.346714	-0.722308	-0.125856	-0.17166
